# Supplementary material for: A Multiomics Evaluation of the Countermeasure Influence of 4-Weeks Cranberry Beverage Supplementation on Exercise-Induced Changes in Innate Immunity
Source: Preprints.org preprint supplement (doi:10.20944/preprints202409.0178.v1), 2024-09-03
Supplement: Supplementary file 1 [file supplementary]

## Sheet: Proteins ANOVA
Protein.Group	Genes	First.Protein.Description	A_T1	A_T2	A_T3	A_T4	A_T5	A_T6	B_T1	B_T2	B_T3	B_T4	B_T5	B_T6	Two-way ANOVA p value Supp	Two-way ANOVA p value TP	Two-way ANOVA p value Interaction
A0A075B6H7	IGKV3-7	Probable non-functional immunoglobulin kappa variable 3-7	-0.0476866	0.411033	-0.220013	-0.320485	-0.252285	-0.503597	-0.0476866	0.375158	0.019515	0.114214	0.340043	0.13179	0.00628984	0.0510176	0.359824
A0A075B6P5	IGKV2-28	Immunoglobulin kappa variable 2-28	-0.243953	-0.499392	0.104321	0.320753	0.243442	0.0934931	-0.243953	-0.543671	0.329375	0.1783	0.119628	0.141658	0.955946	0.000157887	0.945583
A0A075B6R2	IGHV4-4	Immunoglobulin heavy variable 4-4	-0.00618409	-0.106586	-0.174836	-0.379949	0.104319	-0.141686	-0.00618409	0.185671	-0.00683572	0.0425553	0.220736	0.26898	0.0433579	0.635979	0.878405
A0A075B6S2	IGKV2D-29	Immunoglobulin kappa variable 2D-29	0.114365	0.281995	-0.13704	-0.574658	-0.148357	-0.418178	0.114365	0.453886	0.0268672	-0.00817522	0.328573	-0.0336447	0.00963418	0.00968501	0.689611
A0A075B6S5	IGKV1-27	Immunoglobulin kappa variable 1-27	0.325216	0.270252	-0.204612	-0.145367	0.0545112	-0.0223337	0.325216	0.119401	-0.453483	-0.259044	-0.0449528	0.0351953	0.419382	0.0121653	0.979582
A0A087WW87	IGKV2-40	Immunoglobulin kappa variable 2-40	-0.0808908	0.114318	-0.1607	-0.217767	-0.10038	-0.335192	-0.0808908	0.219072	0.0968127	0.0960027	0.143815	0.305802	0.0252175	0.851312	0.701469
A0A0A0MS14	IGHV1-45	Immunoglobulin heavy variable 1-45	0.271484	0.585296	-0.0520183	-0.640648	-0.19613	-0.428515	0.271484	0.503298	-0.184269	-0.075201	0.206916	-0.261697	0.163446	3.64e-06	0.368965
A0A0A0MT36	IGKV6D-21	Immunoglobulin kappa variable 6D-21	0.0805722	0.334105	0.292107	0.0752455	0.135307	0.00981371	0.0805722	-0.281453	-0.00228037	-0.521001	-0.186893	-0.0160938	0.0073962	0.551982	0.484614
A0A0B4J1U7	IGHV6-1	Immunoglobulin heavy variable 6-1	0.101827	0.442904	0.371607	-0.165859	0.174997	-0.226947	0.101827	0.0819645	-0.207411	-0.332149	-0.0211457	-0.321615	0.0420402	0.0410637	0.736635
A0A0B4J1V2	IGHV2-26	Immunoglobulin heavy variable 2-26	0.0885959	-0.300296	0.0218525	-0.0102814	0.364909	0.188514	0.0885959	-0.477643	0.135747	-0.224918	-0.0802839	0.205208	0.304825	0.0359892	0.759128
A0A0B4J1X5	IGHV3-74	Immunoglobulin heavy variable 3-74	0.0538126	0.144453	-0.231899	-0.391038	0.0223185	-0.280739	0.0538126	0.412026	-0.103239	-0.00686395	0.359787	-0.0324297	0.0477778	0.0626771	0.937317
A0A0B4J1X8	IGHV3-43	Immunoglobulin heavy variable 3-43	0.148317	0.481715	0.205901	-0.218191	-0.175774	-0.109908	0.148317	0.258034	-0.185526	-0.337375	-0.036639	-0.178872	0.333985	0.0197258	0.828846
A0A0B4J1Y9	IGHV3-72	Immunoglobulin heavy variable 3-72	0.197743	0.44187	0.0829326	-0.460954	0.0816621	-0.56317	0.197743	0.530665	-0.31949	-0.224937	0.228359	-0.192422	0.509012	1.68e-05	0.445622
A0A0B4J2D9	IGKV1-13	Immunoglobulin kappa variable 1D-13	0.0145694	0.0197151	-0.401111	-0.416987	-0.068819	-0.172102	0.0145694	0.479735	-0.155814	0.197248	0.24638	0.242616	0.0029063	0.143608	0.724671
A0A0C4DH30	IGHV3-16	Probable non-functional immunoglobulin heavy variable 3-16	0.195475	0.534701	-0.215969	-0.602039	-0.0332726	-0.483982	0.195475	0.531183	-0.0396703	-0.117975	0.238397	-0.202322	0.0690978	9.42e-06	0.794145
A0A0C4DH34	IGHV4-28	Immunoglobulin heavy variable 4-28	0.18128	0.406697	-0.0571092	-0.240787	0.0641515	-0.371537	0.18128	0.369675	-0.192868	-0.137345	0.0246095	-0.228046	0.959773	0.00602753	0.984453
A0A0C4DH35	IGHV3-35	Probable non-functional immunoglobulin heavy variable 3-35	0.118019	0.512227	0.0230843	-0.67683	-0.070279	-0.429836	0.118019	0.526224	-0.121775	0.00250606	0.188398	-0.189758	0.117172	9.26e-05	0.335705
A0A0C4DH36	IGHV3-38	Probable non-functional immunoglobulin heavy variable 3-38	0.160445	0.326597	0.00950703	-0.388042	-0.248767	-0.624339	0.160445	0.584819	0.0308124	-0.124217	0.139159	-0.0264185	0.0234967	0.000788949	0.63995
A0A0C4DH38	IGHV5-51	Immunoglobulin heavy variable 5-51	0.252499	0.332077	-0.127233	-0.362825	-0.0189099	-0.378504	0.252499	0.296088	-0.185886	-0.15799	0.0320083	0.0661753	0.377591	0.015689	0.795096
A0A0C4DH43	IGHV2-70D	Immunoglobulin heavy variable 2-70D	-0.000365753	0.612047	0.0416623	0.0175848	0.263293	-0.208308	-0.000365753	0.195734	-0.368914	-0.135752	-0.216579	-0.200036	0.0343437	0.035608	0.677696
A0A0C4DH68	IGKV2-24	Immunoglobulin kappa variable 2-24	-0.141867	0.180279	-0.363367	-0.378941	-0.256711	-0.53295	-0.141867	0.690761	0.222509	0.401927	0.359087	-0.0388601	8.71e-06	0.00647335	0.439739
A0A0C4DH72	IGKV1-6	Immunoglobulin kappa variable 1-6	-0.155991	0.564017	-0.138539	-0.302956	-0.037721	-0.324549	-0.155991	0.426435	-0.229197	0.131939	0.276377	-0.0538232	0.244282	0.0025726	0.593945
B9A064	IGLL5	Immunoglobulin lambda-like polypeptide 5	-0.278232	-0.289547	0.239499	0.208701	-0.058362	-0.0632267	-0.278232	-0.166094	0.393316	0.173708	0.024633	0.0938374	0.484417	0.0212435	0.994824
O00187	MASP2	Mannan-binding lectin serine protease 2	0.0268473	-0.186993	0.439506	0.136239	0.309306	0.0771108	0.0268473	-0.746138	0.0446242	-0.073855	-0.102535	0.0490409	0.018656	0.0105206	0.651222
O00533	CHL1	Neural cell adhesion molecule L1-like protein	-0.204617	-0.200142	0.276495	0.129276	0.237153	0.0413821	-0.204617	-0.427601	0.505661	0.0288453	0.079973	-0.26181	0.413177	0.00458904	0.805007
O14786	NRP1	Neuropilin-1	0.116453	-0.514013	0.0278491	-0.216276	-0.0396251	-0.0956054	0.116453	-0.0572903	0.36372	0.0646301	0.118202	0.115503	0.037591	0.217557	0.907001
O15143	ARPC1B	Actin-related protein 2/3 complex subunit 1B	0.00611109	-0.0801716	-0.302716	-0.132811	-0.0604774	-0.194695	0.00611109	-0.173208	0.126791	0.378704	0.220237	0.206123	0.0280702	0.810642	0.578829
O15394	NCAM2	Neural cell adhesion molecule 2	-0.158391	-0.00914329	-0.122645	-0.339432	-0.190181	-0.289663	-0.158391	0.176774	0.253657	0.372634	0.171229	0.29355	0.00137016	0.865955	0.516021
O43157	PLXNB1	Plexin-B1	-0.124587	0.0871019	-0.123418	-0.358581	-0.0748921	-0.270398	-0.124587	0.0938288	0.181875	0.373894	0.151826	0.187937	0.0128668	0.92418	0.425923
O60462	NRP2	Neuropilin-2	0.0183471	0.415905	0.0155757	0.186484	0.429072	0.0366686	0.0183471	0.012282	-0.276478	-0.59641	-0.21256	-0.047233	0.00132189	0.301944	0.299012
O75882	ATRN	Attractin	0.170974	0.60675	0.0323108	-0.283445	0.0385907	-0.877027	0.170974	0.399242	-0.0628009	-0.110551	0.208159	-0.293177	0.343656	1.14e-06	0.375126
O94985	CLSTN1	Calsyntenin-1	0.0747792	0.190724	-0.037776	-0.455806	-0.307725	-0.370013	0.0747792	0.402355	0.344912	0.0227676	0.174246	-0.113244	0.00829395	0.0415313	0.818177
O95445	APOM	Apolipoprotein M	0.256041	0.702308	0.178533	-0.141679	-0.052233	-0.330202	0.256041	0.358178	-0.102552	-0.284771	-0.272712	-0.566952	0.0656429	5.39e-06	0.96345
O95497	VNN1	Pantetheinase	0.0867564	0.370024	-0.140431	-0.482062	-0.168449	-0.458159	0.0867564	0.513991	0.168495	0.000940114	0.00928098	0.0128572	0.0200699	0.00634822	0.789873
P00734	F2	Prothrombin	0.355707	-0.209199	-0.166059	-0.410081	0.0318141	-0.201166	0.355707	-0.22413	-0.054892	0.211352	0.2623	0.0486462	0.0813203	0.0466804	0.620968
P00736	C1R	Complement C1r subcomponent	0.120318	0.246302	0.139228	-0.35723	-0.26836	0.470688	0.120318	0.087977	-0.0963699	-0.423018	-0.489846	0.449992	0.296099	3.43e-05	0.982949
P00739	HPR	Haptoglobin-related protein	0.0224613	-0.147423	-0.380267	-0.0506038	-0.26177	-0.0978781	0.0224613	0.223015	0.18765	0.234574	0.0599585	0.187822	0.00871087	0.901762	0.835942
P00740	F9	Coagulation factor IX	0.134302	0.218164	-0.0631986	-0.338463	0.466129	0.193133	0.134302	-0.0286966	-0.476773	-0.579367	0.276065	0.0644038	0.0707316	0.000239504	0.939176
P00742	F10	Coagulation factor X	0.224221	0.212118	-0.276027	-0.542539	-0.317687	-0.274688	0.224221	0.588906	-0.12541	-0.071992	0.292429	0.0664469	0.0039649	0.00239604	0.666848
P00746	CFD	Complement factor D	0.308555	0.28052	0.1745	-0.178643	-0.358474	0.100364	0.308555	0.184235	0.0573003	-0.218622	-0.42347	-0.23482	0.338816	0.00287603	0.96984
P00747	PLG	Plasminogen	0.0111163	-0.0533609	0.624606	0.217481	0.0837276	-0.0134067	0.0111163	-0.19174	-0.00702408	-0.263605	-0.101378	-0.317534	0.0117132	0.219659	0.629625
P00748	F12	Coagulation factor XII	0.246937	0.0122235	0.205457	0.157935	0.156959	0.051604	0.246937	-0.436414	-0.0865858	-0.146021	-0.0201418	-0.388889	0.0163701	0.208096	0.87277
P00751	CFB	Complement factor B	-0.143728	-0.210504	-0.298097	-0.0960567	-0.136984	0.189559	-0.143728	-0.0204331	0.161693	0.154722	0.107011	0.436545	0.0450358	0.230435	0.928398
P00915	CA1	Carbonic anhydrase 1	-0.0294128	-0.0270729	-0.205334	-0.335878	-0.281563	-0.558107	-0.0294128	0.463875	0.409744	0.337222	0.200939	0.0550018	2.64e-05	0.258413	0.547039
P01019	AGT	Angiotensinogen	0.296888	0.488339	0.219636	-0.048842	0.12912	0.273132	0.296888	-0.163407	-0.400611	-0.463468	-0.364723	-0.262951	6.6e-05	0.0588927	0.583734
P01023	A2M	Alpha-2-macroglobulin	0.15456	0.164419	-0.405633	-0.427194	-0.208758	-0.384985	0.15456	0.52417	-0.00438609	0.130246	0.236567	0.0664351	0.00119421	0.0352004	0.786865
P01024	C3	Complement C3	0.192513	0.0544684	-0.607341	-0.590472	-0.345622	-0.211427	0.192513	0.611524	-0.171841	0.167153	0.31853	0.390003	6.34e-06	0.00180516	0.413309
P01033	TIMP1	Metalloproteinase inhibitor 1	0.0711658	-0.287223	-0.317399	-0.333567	-0.437676	-0.0790379	0.0711658	0.114759	0.362332	0.451307	0.111003	0.273168	5.75e-05	0.738708	0.409287
P01042	KNG1	Kininogen-1	0.022678	-0.383791	0.0449014	0.246088	0.114973	0.229491	0.022678	-0.582416	0.175859	0.174658	-0.0735151	0.00839511	0.424117	0.00935972	0.942081
P01344	IGF2	Insulin-like growth factor II	0.265768	0.0737109	-0.260752	-0.457427	-0.655673	-0.320368	0.265768	0.483625	0.271723	0.00215204	0.134373	0.1971	6.09e-05	0.0130965	0.483769
P01593	IGKV1-33	Immunoglobulin kappa variable 1D-33	-0.183902	0.285653	-0.0695444	0.0404381	0.11948	-0.405054	-0.183902	0.3158	-0.247974	0.0869763	0.500967	-0.258938	0.532404	0.00278687	0.817811
P01619	IGKV3-20	Immunoglobulin kappa variable 3-20	0.214679	0.61897	-0.0367946	-0.46492	0.197713	-0.279606	0.214679	0.331332	-0.478176	-0.286695	0.235826	-0.267008	0.452429	8.98e-06	0.600414
P01700	IGLV1-47	Immunoglobulin lambda variable 1-47	-0.0145028	-0.0414229	-0.31166	-0.0566969	-0.0283598	-0.259925	-0.0145028	0.287853	0.25523	0.153855	-0.02911	0.0592406	0.0413938	0.917164	0.708461
P01714	IGLV3-19	Immunoglobulin lambda variable 3-19	-0.1238	0.231781	0.344355	0.283172	0.341393	0.287363	-0.1238	-0.296475	-0.22547	-0.281441	-0.153111	-0.283968	7.99e-05	0.914282	0.659938
P01715	IGLV3-1	Immunoglobulin lambda variable 3-1	-0.159833	0.532427	0.511554	0.190909	0.357206	0.109715	-0.159833	-0.341047	-0.0956259	-0.274464	-0.266757	-0.404251	6.13e-06	0.356126	0.352053
P01717	IGLV3-25	Immunoglobulin lambda variable 3-25	0.0470874	0.107758	0.472166	0.13048	0.204356	-0.0283729	0.0470874	-0.305853	-0.0991148	-0.128906	-0.168414	-0.278273	0.0072452	0.615057	0.801134
P01742	IGHV1-69	Immunoglobulin heavy variable 1-69	0.210035	0.542752	0.262672	-0.415059	0.154171	-0.438098	0.210035	0.367108	-0.400189	-0.246824	0.0626985	-0.309302	0.343161	6.31e-05	0.293453
P01766	IGHV3-13	Immunoglobulin heavy variable 3-13	-0.0010072	-0.627195	0.0388299	-0.046908	-0.161717	-0.178039	-0.0010072	-0.167265	0.252605	0.157588	0.22914	0.504975	0.00437037	0.0561986	0.596884
P01768	IGHV3-30	Immunoglobulin heavy variable 3-30	0.167438	0.600518	0.0779316	-0.572171	-0.0531118	-0.467563	0.167438	0.548708	-0.161565	-0.107413	0.193869	-0.394077	0.454904	1.72e-06	0.528373
P01782	IGHV3-43D	Immunoglobulin heavy variable 3-9	-0.0433251	0.0712633	-0.113573	-0.42845	-0.0511078	-0.292077	-0.0433251	0.370561	0.18144	0.0768005	0.234509	0.0372833	0.0135608	0.370484	0.893122
P01817	IGHV2-5	Immunoglobulin heavy variable 2-5	-0.17548	0.172473	-0.0577125	-0.251602	-0.371601	-0.197953	-0.17548	0.217319	0.228748	0.260152	0.233486	0.11765	0.0109673	0.526128	0.592927
P01857	IGHG1	Immunoglobulin heavy constant gamma 1	-0.380876	-0.183764	0.195782	0.310412	0.238721	-0.0195997	-0.380876	-0.375027	0.248576	0.212229	0.155507	-0.0210837	0.637998	0.00187763	0.992076
P01876	IGHA1	Immunoglobulin heavy constant alpha 1	0.0145912	-0.0987412	-0.263939	-0.32068	-0.214509	-0.312486	0.0145912	0.287317	0.230705	0.230245	0.1747	0.258206	0.000583238	0.9861	0.72963
P01877	IGHA2	Immunoglobulin heavy constant alpha 2	0.173457	0.0502364	-0.321432	-0.268219	-0.218253	-0.101813	0.173457	0.299933	0.0602219	-0.0359809	-0.0586593	0.247052	0.0484638	0.283377	0.945127
P01889	HLA-B	HLA class I histocompatibility antigen, B alpha chain	0.111545	-0.183457	0.276612	0.0279853	0.162145	0.37211	0.111545	-0.500568	0.0473758	-0.135225	-0.0957346	-0.194334	0.0264286	0.134128	0.817273
P02452	COL1A1	Collagen alpha-1(I) chain	0.284511	0.159581	-0.257004	-0.0942514	-0.200249	-0.107549	0.284511	0.260378	-0.0438022	0.0290904	0.154495	-0.469712	0.532012	0.0399837	0.583022
P02538	KRT6A	Keratin, type II cytoskeletal 6A	-0.0333916	-0.415697	-0.130046	-0.0167547	-0.299468	-0.161508	-0.0333916	0.0699268	0.189034	0.314863	0.256488	0.259945	0.00234658	0.717762	0.791048
P02649	APOE	Apolipoprotein E	0.432582	0.428826	-0.476624	-0.694736	-0.0758919	-0.227808	0.432582	0.570964	-0.403775	-0.212117	0.31923	-0.0932308	0.058128	6.17e-09	0.758371
P02654	APOC1	Apolipoprotein C-I	0.373009	0.296251	-1.46421	-0.67703	0.319955	0.2374	0.373009	0.55562	-1.00546	-0.188184	0.610051	0.569587	0.000664687	9.06e-32	0.660241
P02655	APOC2	Apolipoprotein C-II	0.492744	0.224676	-0.310447	-0.687084	-0.289529	0.257497	0.492744	0.224697	-0.110728	-0.494532	-0.076236	0.276199	0.341784	8.09e-08	0.976351
P02656	APOC3	Apolipoprotein C-III	0.35975	0.202478	-0.179711	-0.546615	-0.074791	-0.0476692	0.35975	0.123025	0.106321	-0.36577	0.00385165	0.0593807	0.401295	0.00245586	0.955488
P02743	APCS	Serum amyloid P-component	0.514847	0.583976	0.162678	-0.683908	-0.31813	-0.474441	0.514847	0.418599	-0.216091	-0.420135	0.0892645	-0.171506	0.502289	1.04e-09	0.236017
P02746	C1QB	Complement C1q subcomponent subunit B	0.144603	0.164107	-0.209366	-0.272644	0.197163	-0.202961	0.144603	0.466004	-0.526589	-0.294131	0.404721	-0.0155096	0.59628	0.000458712	0.657757
P02748	C9	Complement component C9	0.0466362	-0.0979742	-0.175871	-0.080984	-0.0498383	0.436248	0.0466362	-0.139995	-0.181322	-0.114228	-0.0777769	0.388469	0.821321	0.0431361	0.999995
P02749	APOH	Beta-2-glycoprotein 1	0.163847	-0.126258	-0.373777	-0.200738	-0.122748	0.577808	0.163847	0.0948265	-0.156177	-0.201924	-0.122166	0.303461	0.810585	0.00374662	0.82739
P02750	LRG1	Leucine-rich alpha-2-glycoprotein	-0.172404	-0.185464	-0.0316947	-0.12854	-0.0726908	0.681919	-0.172404	-0.319092	-0.138676	-0.0753605	-0.0182657	0.632672	0.786549	4.14e-05	0.994574
P02760	AMBP	Protein AMBP	-0.194923	-0.449879	-0.481757	-0.0288684	0.106732	0.553616	-0.194923	-0.210811	0.0264771	0.206262	0.0664314	0.601643	0.13876	3.2e-05	0.723071
P02763	ORM1	Alpha-1-acid glycoprotein 1	-0.150415	-0.36215	-0.132465	-0.0659546	-0.129551	0.0154954	-0.150415	0.0545936	0.278734	0.206955	0.149156	0.286016	0.017869	0.554457	0.920665
P02766	TTR	Transthyretin	0.383904	0.180236	-1.04779	-0.598825	0.66583	0.390783	0.383904	0.200541	-1.27452	-0.462263	0.836678	0.341515	0.923145	1.99e-32	0.83104
P02787	TF	Serotransferrin	-0.0959558	-0.470165	-0.208418	0.182208	0.123973	-0.0149005	-0.0959558	-0.314338	0.251229	0.367027	0.200934	0.0743617	0.159781	0.0203511	0.896866
P03951	F11	Coagulation factor XI	0.261473	-0.0355828	-0.417671	-0.31999	-0.125153	-0.083979	0.261473	0.421936	-0.294201	-0.0280408	0.25009	0.109646	0.0355268	0.0191905	0.872457
P04004	VTN	Vitronectin	0.0261204	0.411583	0.00161934	-0.384636	-0.118978	0.211252	0.0261204	0.280928	-0.17474	-0.344207	-0.0527493	0.117687	0.669238	0.0117251	0.987109
P04075	ALDOA	Fructose-bisphosphate aldolase A	0.0150618	-0.184555	-0.394035	-0.66606	-0.336491	0.149158	0.0150618	0.535568	0.213347	0.162753	0.487394	0.00279628	2.71e-05	0.290665	0.0283648
P04114	APOB	Apolipoprotein B-100	0.534961	0.231759	-0.0114779	-0.257496	-0.246207	-0.322902	0.534961	0.128298	-0.0389143	-0.190528	-0.15099	-0.211464	0.833033	0.000192293	0.993896
P04180	LCAT	Phosphatidylcholine-sterol acyltransferase	0.346471	0.357578	0.133856	-0.401401	-0.30511	-0.225001	0.346471	-0.043877	-0.0363959	0.0558291	-0.000465872	-0.227953	0.784342	0.0262943	0.286302
P04217	A1BG	Alpha-1B-glycoprotein	-0.267196	-0.286218	-0.166149	0.439433	0.255278	0.378767	-0.267196	-0.496532	0.00608308	0.174034	0.143763	0.0859348	0.296677	0.000728116	0.837298
P04433	IGKV3-11	Immunoglobulin kappa variable 3-11	0.227241	0.186914	-0.196159	-0.12068	0.105035	-0.0450874	0.227241	0.231269	-0.361335	-0.269152	0.216163	-0.201449	0.648644	0.0283989	0.969726
P05109	S100A8	Protein S100-A8	-0.284644	-0.0305206	0.314684	0.144232	-0.0739915	-0.19929	-0.284644	-0.30538	0.401234	0.222451	0.222187	-0.126319	0.705588	0.00965969	0.822341
P05154	SERPINA5	Plasma serine protease inhibitor	0.399958	0.568817	-0.093969	-0.231926	-0.0798857	0.330733	0.399958	-0.0919105	-0.0741494	-0.366003	-0.338703	-0.422919	0.00784475	0.00207855	0.189509
P05155	SERPING1	Plasma protease C1 inhibitor	0.318077	0.271621	-0.411336	-0.209107	0.119468	-0.143238	0.318077	0.217681	-0.234305	-0.0461229	0.0874781	-0.288294	0.873537	0.00460738	0.95929
P05452	CLEC3B	Tetranectin	-0.0931402	-0.690879	0.194148	0.354023	0.284182	-0.0935091	-0.0931402	-0.48326	0.37352	0.265867	0.149635	-0.167448	0.892553	1.21e-05	0.922334
P05543	SERPINA7	Thyroxine-binding globulin	0.0699079	0.295583	-0.298329	-0.359571	0.30088	0.264765	0.0699079	0.140622	-0.574594	-0.194766	0.110855	0.174738	0.421342	0.000907502	0.90216
P05546	SERPIND1	Heparin cofactor 2	0.230372	0.510813	-0.168423	-0.295455	0.0138877	-0.0971116	0.230372	0.17419	-0.315646	-0.197635	0.124125	-0.209488	0.571005	0.00703219	0.869284
P06310	IGKV2-30	Immunoglobulin kappa variable 2-30	-0.0175123	-0.541579	0.299333	0.426486	0.108395	0.16369	-0.0175123	-0.810764	0.179818	0.22154	-0.0824786	0.0705841	0.187807	4.35e-06	0.987068
P06331	IGHV4-34	Immunoglobulin heavy variable 4-34	0.0920838	0.50062	-0.0150803	-0.208081	0.146504	-0.166862	0.0920838	0.390803	-0.274332	-0.265271	0.102001	-0.39447	0.306093	0.00189707	0.982158
P06396	GSN	Gelsolin	-0.213511	-0.333035	0.24719	0.445618	0.140783	-0.48626	-0.213511	-0.363197	0.54427	0.510104	0.147981	-0.426433	0.544516	1.09e-07	0.963824
P06681	C2	Complement C2	0.121419	-0.0986933	-0.299864	-0.385745	-0.2343	-0.140502	0.121419	0.0630766	0.455668	0.177871	-0.0713263	0.290977	0.00268481	0.68258	0.390716
P06702	S100A9	Protein S100-A9	-0.244772	-0.172478	0.242864	0.362331	0.163841	-0.282614	-0.244772	-0.143225	0.161772	0.136318	0.269676	-0.248939	0.840454	0.00942718	0.972748
P06727	APOA4	Apolipoprotein A-IV	0.275511	0.644102	-0.234322	-0.446531	-0.336892	0.690267	0.275511	0.41239	-0.295498	-0.576513	-0.56033	0.152306	0.0624515	3.28e-11	0.747069
P07339	CTSD	Cathepsin D	-0.088526	0.323691	0.59115	0.481919	-0.0998061	0.16849	-0.088526	-0.33617	0.0790797	-0.190272	-0.398042	-0.442987	4.91e-05	0.0380411	0.457346
P07357	C8A	Complement component C8 alpha chain	0.206044	-0.0270225	-0.151497	0.138556	0.180307	0.500817	0.206044	-0.34174	-0.503149	-0.0551811	-0.317821	0.164643	0.0130693	0.00897412	0.867358
P07358	C8B	Complement component C8 beta chain	0.0636206	-0.309603	-0.370925	0.058341	0.220149	0.503885	0.0636206	-0.170962	-0.417182	-0.165527	0.0476688	0.476915	0.624588	0.000194934	0.953739
P07360	C8G	Complement component C8 gamma chain	0.279917	0.742631	-0.199813	-0.567028	-0.0593756	-0.137014	0.279917	0.378387	-0.487163	-0.396971	0.120812	0.0457018	0.856516	2.26e-07	0.508975
P07942	LAMB1	Laminin subunit beta-1	-0.139493	-0.516177	-0.160275	-0.0713096	-0.23325	-0.203379	-0.139493	0.0824114	0.374798	0.424988	0.333058	0.24812	0.00011694	0.322605	0.66542
P08519	LPA	Apolipoprotein(a)	-0.0990442	0.36007	0.508486	0.378549	0.0816912	0.175552	-0.0990442	-0.248297	-0.122713	-0.247621	-0.215986	-0.471644	4.23e-05	0.515643	0.466143
P08571	CD14	Monocyte differentiation antigen CD14	-0.113299	-0.0396613	-0.2427	0.0402012	0.36847	0.629606	-0.113299	-0.590676	-0.0693987	-0.296761	0.0100121	0.417505	0.0555033	0.000219911	0.463395
P08697	SERPINF2	Alpha-2-antiplasmin	0.372138	0.621814	-0.460055	-0.559347	-0.022663	0.0566498	0.372138	0.334966	-0.455083	-0.205337	-0.0165266	-0.0386936	0.979331	4.36e-07	0.700115
P08709	F7	Coagulation factor VII	0.102	0.161548	-0.221697	-0.240655	-0.162268	-0.296558	0.102	0.528	-0.177708	-0.0755927	0.305121	-0.0241909	0.056057	0.0453653	0.828778
P09211	GSTP1	Glutathione S-transferase P	0.0686582	0.676512	0.217833	-0.594406	-0.181484	-0.220712	0.0686582	0.408127	0.23897	-0.165741	-0.0629676	-0.453447	0.91934	5.03e-06	0.49236
P09486	SPARC	SPARC	0.0276012	-0.133189	-0.185735	-0.171672	-0.0895842	-0.226349	0.0276012	0.244706	-0.010029	0.0656873	0.487911	-0.0369478	0.0252567	0.599234	0.785509
P09871	C1S	Complement C1s subcomponent	0.233885	0.161636	-0.30546	-0.406955	-0.196248	0.469124	0.233885	0.119944	-0.206016	-0.177979	-0.390107	0.464292	0.895922	5.85e-05	0.9312
P0DJI8	SAA1	Serum amyloid A-1 protein	-0.0653433	-0.0450504	-0.260724	-0.197175	-0.0869588	0.836922	-0.0653433	-0.10599	-0.342678	-0.311719	-0.16614	0.810199	0.578188	1.45e-08	0.999742
P0DOY3	IGLC3	Immunoglobulin lambda constant 3	-0.0535556	-0.243204	0.0510145	-0.0536705	-0.199463	-0.420704	-0.0535556	0.0728401	0.330434	0.226516	0.24861	0.0947388	0.00814951	0.53812	0.848108
P0DP23	CALM1	Calmodulin-1	0.168886	-0.205453	-0.251596	-0.218127	-0.372544	-0.11747	0.168886	0.0862146	0.33425	0.226918	0.0607899	0.119247	0.00414432	0.710194	0.756458
P10643	C7	Complement component C7	0.457994	0.0382751	-0.299017	0.0155227	0.0141106	-0.362161	0.457994	-0.0405404	-0.283042	-0.016741	0.0164352	0.00116913	0.692829	0.00581094	0.896905
P10909	CLU	Clusterin	-0.0602442	0.138947	-0.481945	-0.315888	-0.252897	0.0362207	-0.0602442	0.381581	0.184599	0.0624858	0.129881	0.237504	0.00672124	0.243951	0.671541
P11021	HSPA5	Endoplasmic reticulum chaperone BiP	0.107293	-0.197573	-0.443399	-0.388992	-0.342704	-0.371993	0.107293	0.634509	0.518357	0.0136775	0.0505148	0.313017	1.29e-06	0.267015	0.137848
P12109	COL6A1	Collagen alpha-1(VI) chain	-0.0938256	-0.196506	-0.00753668	0.00407339	-0.189159	-0.349715	-0.0938256	0.366674	0.117377	0.203971	0.308589	-0.0701155	0.0165594	0.565182	0.704272
P12955	PEPD	Xaa-Pro dipeptidase	0.0236449	-0.150287	-0.242333	-0.159983	-0.0510847	-0.23682	0.0236449	-0.168918	0.272245	0.312966	0.130832	0.246093	0.0190126	0.890101	0.567665
P13489	RNH1	Ribonuclease inhibitor	0.196902	0.309892	0.341088	-0.326973	-0.0485216	-0.242207	0.196902	0.38789	-0.0388339	-0.498	0.0682411	-0.346378	0.496615	0.000452684	0.818267
P13671	C6	Complement component C6	0.101527	0.0789551	0.185195	0.106296	-0.0248629	0.466873	0.101527	-0.367414	-0.106275	-0.296392	-0.275394	0.0299653	0.0083195	0.273606	0.873714
P14618	PKM	Pyruvate kinase PKM	-0.0666572	0.296474	0.156831	-0.119759	0.238595	0.307776	-0.0666572	-0.171902	0.019407	-0.509936	-0.00478042	-0.0793914	0.0188192	0.210833	0.847447
P14625	HSP90B1	Endoplasmin	-0.179523	-0.0433091	0.59673	0.208374	0.0373697	-0.0222424	-0.179523	-0.328625	0.224201	-0.140225	-0.0203599	-0.152868	0.0825796	0.0314054	0.902744
P15169	CPN1	Carboxypeptidase N catalytic chain	0.120087	0.38617	-0.31697	-0.191955	0.13277	-0.00197556	0.120087	0.206895	-0.353667	-0.163426	-0.0222981	0.0842817	0.710608	0.029072	0.983297
P15814	IGLL1	Immunoglobulin lambda-like polypeptide 1	-0.281527	-0.520804	0.168036	0.215324	0.0609227	0.00191958	-0.281527	-0.323412	0.705239	0.173235	0.0676726	0.0149219	0.289567	0.000132572	0.659911
P18428	LBP	Lipopolysaccharide-binding protein	-0.0351194	-0.0438081	-0.123011	-0.23662	-0.0157976	1.06093	-0.0351194	-0.351817	-0.345414	-0.459235	-0.24008	0.825091	0.0556515	7.57e-12	0.975488
P19652	ORM2	Alpha-1-acid glycoprotein 2	-0.0531251	-0.254801	-0.109971	-0.269765	-0.284729	-0.0740815	-0.0531251	0.0980567	0.376246	0.327038	0.17668	0.121578	0.00262577	0.905102	0.699195
P19823	ITIH2	Inter-alpha-trypsin inhibitor heavy chain H2	0.0546814	0.0397973	-0.369823	-0.236205	-0.260641	-0.274725	0.0546814	0.336928	0.138072	0.293481	0.0991556	0.124597	0.00256888	0.656285	0.799546
P19827	ITIH1	Inter-alpha-trypsin inhibitor heavy chain H1	0.163961	0.236978	-0.539257	-0.18375	0.036023	-0.141348	0.163961	0.338406	-0.436074	-0.0150288	0.171186	0.204943	0.210381	0.00228783	0.973409
P20742	PZP	Pregnancy zone protein	0.21881	0.194794	0.0574162	-0.64274	-0.141617	-0.25836	0.21881	0.361985	0.331175	-0.243554	0.0341981	-0.130917	0.0923899	0.0010842	0.94477
P22352	GPX3	Glutathione peroxidase 3	0.29422	0.340649	0.221337	-0.171042	0.169576	-0.0982492	0.29422	-0.114874	-0.319726	-0.197652	-0.135213	-0.283247	0.0282554	0.121643	0.678275
P22792	CPN2	Carboxypeptidase N subunit 2	0.460167	0.715956	-0.069696	-0.514738	-0.283525	-0.107315	0.460167	0.241047	-0.168982	-0.46647	-0.184326	-0.0822845	0.54058	1.67e-07	0.686381
P22897	MRC1	Macrophage mannose receptor 1	-0.00865631	-0.512384	-0.395551	0.151543	0.17205	0.107639	-0.00865631	-0.359149	0.0980647	0.530739	0.0443522	0.180009	0.153111	0.00252643	0.609126
P23083	IGHV1-2	Immunoglobulin heavy variable 1-2	0.16063	0.199012	0.0191741	-0.56291	-0.00271772	-0.214477	0.16063	0.12578	0.0424274	-0.111631	0.324077	-0.139995	0.244168	0.0473484	0.74259
P23142	FBLN1	Fibulin-1	0.143009	0.159449	0.209443	0.214765	0.135509	-0.426483	0.143009	-0.0358847	-0.0546704	-0.02025	0.160023	-0.627921	0.202707	0.00436926	0.962142
P24821	TNC	Tenascin	-0.00681653	0.139783	0.457647	0.0654092	0.144162	0.298836	-0.00681653	-0.338888	0.139798	-0.195883	-0.41864	-0.278592	0.00143387	0.281407	0.679831
P25311	AZGP1	Zinc-alpha-2-glycoprotein	0.230405	0.519793	0.237708	0.16928	0.0461023	0.632936	0.230405	-0.156557	-0.459121	-0.635796	-0.607041	-0.208116	3.35e-08	0.00837156	0.2361
P27797	CALR	Calreticulin	-0.0749648	-0.108747	-0.325505	-0.145173	-0.314723	-0.0787676	-0.0749648	0.175313	0.0972348	0.421129	0.0210315	0.408137	0.0024888	0.487956	0.773614
P29401	TKT	Transketolase	-0.183948	-0.0666004	0.100029	-0.348275	-0.305978	-0.114556	-0.183948	0.336424	0.52355	0.219724	0.132244	-0.108665	0.00748912	0.115666	0.583304
P29508	SERPINB3	Serpin B3	0.0607603	-0.597192	0.0854618	-0.235793	-0.0149601	-0.153812	0.0607603	-0.198975	0.404866	0.267211	0.167082	0.15459	0.0127371	0.0409306	0.851176
P29622	SERPINA4	Kallistatin	0.307525	0.611055	0.217161	-0.439546	0.0499864	-0.256452	0.307525	0.421558	-0.349452	-0.384651	-0.0485196	-0.436189	0.138783	2.17e-06	0.648556
P30101	PDIA3	Protein disulfide-isomerase A3	-0.218233	0.0832939	0.398753	0.142508	0.304392	0.171834	-0.218233	-0.24646	0.0895819	-0.0717585	-0.312114	-0.123564	0.0108402	0.322595	0.774416
P30740	SERPINB1	Leukocyte elastase inhibitor	-0.13373	0.111899	0.168497	0.281317	0.349956	0.0302103	-0.13373	-0.328285	-0.194926	-0.0162486	0.0463922	-0.181351	0.0202314	0.465185	0.918198
P31025	LCN1	Lipocalin-1	0.270521	0.249233	0.22443	-0.190081	-0.253786	-0.245924	0.270521	0.0935418	0.195542	-0.172898	-0.219228	-0.221872	0.874505	0.0131546	0.997242
P31146	CORO1A	Coronin-1A	0.0321404	0.0603208	-0.102977	-0.359018	-0.416417	-0.165681	0.0321404	0.401825	0.288837	0.236652	-0.146527	0.138705	0.00584373	0.191601	0.793286
P32119	PRDX2	Peroxiredoxin-2	-0.138767	-0.127259	0.0474711	-0.167051	-0.102421	-0.264331	-0.138767	-0.174636	0.529699	0.372382	0.0871141	0.076565	0.0293372	0.199106	0.576506
P33151	CDH5	Cadherin-5	-0.18106	-0.622435	0.329843	-0.165946	0.117567	-0.0136242	-0.18106	-0.314276	0.434278	0.290298	0.172456	0.133959	0.11362	0.000585119	0.856568
P35858	IGFALS	Insulin-like growth factor-binding protein complex acid labile subunit	0.22821	0.314258	0.131748	-0.365141	-0.162707	-0.0853823	0.22821	0.212955	-0.144046	-0.249384	-0.0751548	-0.0335663	0.85988	0.0407829	0.928801
P36955	SERPINF1	Pigment epithelium-derived factor	0.223194	0.380536	-0.22977	-0.264508	-0.105351	0.484372	0.223194	0.0311527	-0.283191	-0.276683	-0.460162	0.277215	0.148258	0.000300133	0.878084
P41222	PTGDS	Prostaglandin-H2 D-isomerase	0.277243	0.0140779	-0.259934	0.144861	-0.38816	0.278494	0.277243	0.0431277	-0.0856173	-0.0555956	-0.490516	0.244776	0.845425	0.0022737	0.95968
P43121	MCAM	Cell surface glycoprotein MUC18	0.144117	0.0515608	-0.45705	-0.301489	0.051077	-0.448888	0.144117	0.261047	0.235104	0.200276	0.0443188	0.0758085	0.00533424	0.420629	0.352952
P49747	COMP	Cartilage oligomeric matrix protein	-0.122938	-0.119297	0.144927	0.234771	-0.0169981	0.113973	-0.122938	-0.544144	0.198846	0.291954	0.0337012	-0.0918562	0.496771	0.0480186	0.781616
P49908	SELENOP	Selenoprotein P	0.200284	0.364706	0.249429	-0.463019	0.0278307	0.129954	0.200284	0.230625	-0.313649	-0.220739	-0.21914	-0.186566	0.136589	0.0233427	0.42703
P51153	RAB10	Ras-related protein Rab-13	0.0100101	0.210478	0.0907134	0.202196	-0.0776394	0.289494	0.0100101	-0.324069	-0.434317	-0.00840888	-0.0732336	0.104766	0.0367314	0.500322	0.604062
P55056	APOC4	Apolipoprotein C-IV	0.171476	-0.0264817	0.596232	-0.114412	-0.513212	-0.294034	0.171476	-0.12786	0.511234	0.209087	-0.414919	-0.168585	0.588607	7.4e-06	0.888418
P55058	PLTP	Phospholipid transfer protein	0.154924	0.506726	-0.24694	-0.387875	-0.233637	-0.314687	0.154924	0.49469	-0.263306	-0.0293947	0.231094	-0.0665189	0.123108	0.000668386	0.704569
P55285	CDH6	Cadherin-6	-0.00125587	0.159764	0.583095	0.350276	0.0836879	0.226702	-0.00125587	-0.312781	-0.154009	-0.326501	-0.417626	-0.190096	4.43e-05	0.520644	0.488749
P55290	CDH13	Cadherin-13	0.0675974	0.244366	-0.486141	-0.0250012	-0.0928752	-0.386698	0.0675974	0.387268	-0.103453	0.284603	0.259906	-0.21717	0.0472536	0.00845185	0.923205
P61224	RAP1B	Ras-related protein Rap-1b	-0.0596845	0.19207	0.125049	0.157367	0.0744854	0.470466	-0.0596845	-0.0584906	-0.074496	-0.0590229	-0.298773	-0.409286	0.00566282	0.940136	0.341671
P62937	PPIA	Peptidyl-prolyl cis-trans isomerase A	-0.00666879	0.196036	0.258049	0.236542	0.162211	-0.0539015	-0.00666879	-0.19383	0.0455586	-0.20695	-0.255715	-0.174662	0.0233369	0.860172	0.842403
P68871	HBB	Hemoglobin subunit beta	-0.150651	-0.18274	-0.00469922	-0.259398	-0.189212	-0.351836	-0.150651	-0.0556091	0.570292	0.518111	0.140345	0.116047	0.0008854	0.175053	0.369752
P69905	HBA1	Hemoglobin subunit alpha	-0.144348	-0.173842	-0.0111818	-0.257827	-0.186732	-0.353453	-0.144348	-0.0552096	0.537064	0.51104	0.156799	0.122038	0.00101601	0.231221	0.389988
P78417	GSTO1	Glutathione S-transferase omega-1	0.0529877	0.307228	-0.224754	-0.543985	-0.432376	-0.163634	0.0529877	0.342001	0.196601	0.189398	0.109384	0.114161	0.00337005	0.127491	0.373093
P78509	RELN	Reelin	-0.104435	0.0220093	0.583322	0.392026	0.197021	-0.059792	-0.104435	-0.308252	0.0697703	-0.270083	-0.0272487	-0.389902	0.00264334	0.0685706	0.636018
P80748	IGLV3-21	Immunoglobulin lambda variable 3-21	0.121	0.38299	0.0865017	-0.176217	-0.287253	-0.642959	0.121	0.515564	-0.00984415	-0.0800276	0.282347	-0.313102	0.125083	0.000236181	0.565917
P84085	ARF5	ADP-ribosylation factor 5	0.042662	-0.164893	-0.342254	-0.457883	-0.0958535	-0.179099	0.042662	0.191134	0.160613	0.342367	0.285884	0.174661	0.000549499	0.948722	0.510746
Q00610	CLTC	Clathrin heavy chain 1	0.172586	0.162227	0.330029	-0.287458	-0.599859	-0.487909	0.172586	0.358489	0.586246	-0.065544	-0.152672	-0.18872	0.0329525	9.7e-06	0.917951
Q01459	CTBS	Di-N-acetylchitobiase	0.0636766	0.467072	0.0863753	-0.422198	-0.33071	0.0271636	0.0636766	0.486415	-0.121758	0.149065	-0.225806	-0.242972	0.749126	0.00404805	0.327828
Q01518	CAP1	Adenylyl cyclase-associated protein 1	-0.054385	-0.188735	0.484734	0.2047	0.156225	0.255731	-0.054385	-0.540545	-0.0785827	-0.178788	-0.0790002	0.073031	0.0125641	0.0636628	0.793102
Q02413	DSG1	Desmoglein-1	-0.0874995	0.0577716	0.115107	0.377957	0.311814	0.206177	-0.0874995	-0.0876437	-0.294046	-0.219784	-0.0566859	-0.235668	0.0048005	0.856328	0.706858
Q03181	PPARD	Peroxisome proliferator-activated receptor delta	-0.0322555	0.157085	0.342153	0.280875	0.31894	-0.227553	-0.0322555	-0.320037	0.0189916	-0.132401	-0.171401	-0.202142	0.0154515	0.427237	0.628635
Q03591	CFHR1	Complement factor H-related protein 1	-0.0177099	-0.200925	0.579944	0.326819	0.34483	0.1951	-0.0177099	-0.390065	-0.180586	-0.25574	-0.223278	-0.160679	0.000336462	0.227501	0.39352
Q04756	HGFAC	Hepatocyte growth factor activator	0.185337	-0.118422	0.463158	0.224239	0.0948401	-0.0752042	0.185337	-0.369944	0.136244	-0.378119	0.0303636	-0.377829	0.0239235	0.0292155	0.70599
Q08380	LGALS3BP	Galectin-3-binding protein	-0.000780195	0.0917718	0.449602	0.0689391	9.36e-05	-0.637686	-0.000780195	0.0235316	0.201196	-0.120475	0.0605365	-0.13595	0.93476	0.0225519	0.47263
Q08830	FGL1	Fibrinogen-like protein 1	0.0550617	-0.149281	0.359011	-0.126522	-0.582232	-0.0859671	0.0550617	-0.371874	0.426475	0.213232	-0.0122609	0.219296	0.119001	0.00597232	0.390959
Q12805	EFEMP1	EGF-containing fibulin-like extracellular matrix protein 1	-0.0654477	0.103035	0.426398	0.0999045	0.0138034	-0.607658	-0.0654477	0.142969	0.248905	0.0215632	0.0601595	-0.378183	0.929996	0.00179549	0.943861
Q12913	PTPRJ	Receptor-type tyrosine-protein phosphatase eta	0.140972	0.760252	0.383362	-0.453082	-0.148771	-0.543976	0.140972	0.51929	0.0626423	-0.265043	-0.0153996	-0.581219	0.667419	1.77e-09	0.712159
Q13201	MMRN1	Multimerin-1	-0.0453818	0.295831	0.286923	0.226079	0.00696117	0.127845	-0.0453818	-0.279736	-0.0525821	-0.226065	-0.0741064	-0.220386	0.0100385	0.96585	0.698756
Q13740	ALCAM	CD166 antigen	-0.0203767	0.0731073	-0.0515057	-0.262275	-0.250144	-0.387055	-0.0203767	0.305378	0.0879277	0.297172	0.0631745	0.164973	0.00977556	0.7131	0.675236
Q13790	APOF	Apolipoprotein F	0.458785	-0.136945	-0.17218	-0.334112	-0.245456	-0.373133	0.458785	0.307201	0.236948	-0.22291	-0.0822921	0.105309	0.0181311	0.00367383	0.751699
Q13822	ENPP2	Ectonucleotide pyrophosphatase/phosphodiesterase family member 2	0.00643297	0.115634	0.202101	0.186435	0.35679	0.0744269	0.00643297	-0.202504	-0.144281	-0.0827202	-0.0724875	-0.446259	0.00681743	0.696051	0.851363
Q14515	SPARCL1	SPARC-like protein 1	0.084634	-0.162052	0.345905	0.10884	0.418083	0.335328	0.084634	-0.182276	-0.0718718	-0.289999	-0.403619	-0.267606	0.00102024	0.64518	0.245434
Q14624	ITIH4	Inter-alpha-trypsin inhibitor heavy chain H4	0.328153	0.516	-0.531285	-0.3123	0.134893	0.273006	0.328153	0.311167	-0.61947	-0.397998	0.0507639	-0.0810823	0.21468	2.03e-07	0.95479
Q15166	PON3	Serum paraoxonase/lactonase 3	-0.131018	-0.287071	0.183821	-0.308684	-0.0825186	-0.558546	-0.131018	0.368401	0.487784	0.0855488	0.170622	0.20268	0.000526056	0.0995738	0.407885
Q15555	MAPRE2	Microtubule-associated protein RP/EB family member 2	0.0302564	-0.155854	-0.196544	-0.359999	-0.0651459	-0.156911	0.0302564	0.247077	0.0683846	0.216931	0.0466298	0.294919	0.00956824	0.973367	0.706356
Q15691	MAPRE1	Microtubule-associated protein RP/EB family member 1	-0.0677902	-0.277192	-0.129503	-0.10502	-0.134131	-0.336432	-0.0677902	0.143496	0.247379	0.174669	0.268694	0.28362	0.00257884	0.965889	0.757008
Q15762	CD226	CD226 antigen	0.191863	0.000726755	-0.353871	-0.339895	0.154069	0.168066	0.191863	0.318865	-0.544728	-0.27327	0.349891	0.13642	0.596925	0.000410081	0.8348
Q15848	ADIPOQ	Adiponectin	-0.0542079	0.249661	0.223616	0.372272	0.0398809	0.0890364	-0.0542079	-0.312479	-0.0782959	-0.176349	0.0103679	-0.309294	0.00817692	0.902488	0.578236
Q16270	IGFBP7	Insulin-like growth factor-binding protein 7	0.0603715	0.182234	0.216441	0.106368	0.0962292	0.0782416	0.0603715	-0.206731	-0.210913	-0.183047	-0.00563894	-0.193928	0.0348187	0.991059	0.889649
Q16610	ECM1	Extracellular matrix protein 1	-0.135143	-0.323156	0.391412	0.258603	0.161905	-0.157076	-0.135143	-0.361441	0.142797	0.057097	0.0877303	0.0124135	0.568641	0.0278321	0.921576
Q16706	MAN2A1	Alpha-mannosidase 2	-0.194595	-0.17639	-0.137255	-0.196743	-0.343288	-0.294758	-0.194595	0.533597	0.434286	0.265548	0.119846	0.184346	9.16e-05	0.340946	0.58747
Q5SYB0	FRMPD1	FERM and PDZ domain-containing protein 1	0.0500308	0.454266	-0.0827603	-0.0562691	0.490921	0.157311	0.0500308	-0.0264615	-0.540351	-0.341241	0.017402	-0.172879	0.00303528	0.025283	0.817407
Q6GTS8	PM20D1	N-fatty-acyl-amino acid synthase/hydrolase PM20D1	-0.0220048	0.00592968	0.0310456	-0.471646	-0.0147894	-0.311904	-0.0220048	0.288632	0.391149	0.045413	0.106472	-0.0262928	0.0236718	0.208055	0.838175
Q6P179	ERAP2	Endoplasmic reticulum aminopeptidase 2	-0.0779934	-0.555241	-0.138032	0.0973695	-0.0760799	-0.16841	-0.0779934	-0.215594	0.305835	0.410569	0.155042	0.340528	0.00740009	0.035033	0.837731
Q7Z794	KRT77	Keratin, type II cytoskeletal 1b	-0.128362	-0.250087	-0.0636172	-0.175162	-0.192101	-0.0948425	-0.128362	0.0791597	0.31563	0.142803	0.15994	0.335001	0.00952391	0.741343	0.916894
Q86VB7	CD163	Scavenger receptor cysteine-rich type 1 protein M130	0.153813	0.0562377	0.0406094	-0.365386	-0.281074	-0.317205	0.153813	0.611997	0.268481	-0.145953	-0.142936	-0.0323972	0.0369241	0.00940418	0.819351
Q8N1N4	KRT78	Keratin, type II cytoskeletal 78	0.0423606	0.145436	0.109709	-0.258804	-0.33945	-0.482221	0.0423606	0.32076	0.0754873	0.116311	0.198353	0.0296979	0.0234899	0.273023	0.55032
Q8NBJ4	GOLM1	Golgi membrane protein 1	0.0336448	0.0229179	-0.412484	-0.119114	-0.248443	0.038633	0.0336448	0.345142	0.297137	-0.00289665	0.15046	-0.138642	0.0484168	0.797092	0.284291
Q8WZ75	ROBO4	Roundabout homolog 4	-0.092968	0.360698	0.0594535	0.159511	0.378298	0.127958	-0.092968	0.0417927	-0.283249	-0.320162	-0.167979	-0.170386	0.00422706	0.546224	0.810381
Q92954	PRG4	Proteoglycan 4	-0.0931642	0.322507	0.488256	0.141834	0.190834	-0.11055	-0.0931642	-0.142969	-0.240949	-0.24117	-0.0891385	-0.132328	0.0067108	0.757196	0.432749
Q96IY4	CPB2	Carboxypeptidase B2	0.0510981	0.677679	-0.0183785	-0.255542	0.176252	0.199859	0.0510981	0.0631537	-0.408361	-0.395241	0.131431	-0.273048	0.0144199	0.0061141	0.530541
Q9HDC9	APMAP	Adipocyte plasma membrane-associated protein	-0.0612925	-0.104464	-0.078992	-0.161447	-0.148118	-0.376072	-0.0612925	0.242189	0.252613	0.179429	0.135771	0.181677	0.00770734	0.936807	0.847547
Q9NPR2	SEMA4B	Semaphorin-4B	-0.0503672	0.153982	0.208953	0.148387	0.153241	0.392767	-0.0503672	-0.26137	-0.393146	0.137014	-0.159429	-0.279665	0.00366652	0.861919	0.39497
Q9NY97	B3GNT2	N-acetyllactosaminide beta-1,3-N-acetylglucosaminyltransferase 2	0.0309057	0.363638	-0.0747665	-0.173282	-0.295791	-0.249288	0.0309057	0.565314	-0.125164	-0.153361	-0.0488988	0.129789	0.245514	0.0134096	0.872953
Q9UHG3	PCYOX1	Prenylcysteine oxidase 1	0.197747	-0.121578	-0.532995	-0.677244	-0.440923	-0.221538	0.197747	0.517373	0.0527445	0.39711	0.34536	0.286197	8.49e-08	0.115756	0.119003
Q9UK55	SERPINA10	Protein Z-dependent protease inhibitor	-0.0209331	-0.00688157	-0.330069	-0.44064	-0.404552	-0.0703583	-0.0209331	0.220732	0.369065	0.150234	0.1278	0.426536	0.000215293	0.497992	0.494226
Q9UNW1	MINPP1	Multiple inositol polyphosphate phosphatase 1	-0.198683	-0.298722	-0.155858	-0.311705	-0.281933	-0.119768	-0.198683	0.378848	0.14408	0.408062	0.230465	0.403898	7.09e-05	0.64545	0.457491
Q9Y279	VSIG4	V-set and immunoglobulin domain-containing protein 4	0.201982	-0.353696	-0.118929	-0.314727	-0.312845	-0.359792	0.201982	0.359287	0.241012	0.0575715	0.0706134	0.32754	0.000260218	0.559041	0.49229
Q9Y5Y7	LYVE1	Lymphatic vessel endothelial hyaluronic acid receptor 1	-0.295445	-0.189441	0.362161	0.443892	0.316845	0.253651	-0.295445	-0.66484	0.258535	-0.0374276	-0.0471784	-0.105308	0.00809291	0.000446224	0.748994
Q9Y646	CPQ	Carboxypeptidase Q	-0.0295355	-0.385299	0.171349	0.39703	0.25686	-0.157661	-0.0295355	-0.668778	-0.0405197	0.131722	-0.145884	0.500252	0.451622	0.001272	0.079244

## Sheet: Proteins Log2 Intensity
Protein.Group	Genes	First.Protein.Description	S01_A	S01_B	S01_C	S01_D	S01_E	S01_F	S01_G	S01_H	S01_I	S01_J	S01_K	S01_L	S02_A	S02_B	S02_C	S02_D	S02_E	S02_F	S02_G	S02_H	S02_I	S02_J	S02_K	S02_L	S03_A	S03_B	S03_C	S03_D	S03_E	S03_F	S03_G	S03_H	S03_I	S03_J	S03_K	S03_L	S04_A	S04_B	S04_C	S04_D	S04_E	S04_F	S04_G	S04_H	S04_I	S04_J	S04_K
A0A075B6H7	IGKV3-7	Probable non-functional immunoglobulin kappa variable 3-7	26.0646	26.2344	26.1698	26.1507	26.2007	26.1748	26.0019	26.105	25.9818	26.0971	26.108	26.0695	25.8868	25.9034	25.8621	25.7976	25.9649	25.8758	25.7223	25.8443	25.9185	25.7631	25.9687	25.9607	25.6237	25.6651	25.6376	25.6816	25.6959	25.5379	25.597	25.5043	25.5754	25.5778	25.6803	25.655	24.7999	25.1213	25.3575	25.2748	25.283	25.1825	25.167	25.4078	25.3322	25.2876	25.3766
A0A075B6H9	IGLV4-69	Immunoglobulin lambda variable 4-69	21.5793	21.4712	21.1427	21.254	21.6544	21.6594	20.6138	21.1268	20.821	21.3352	20.5526	20.6731	21.5467	21.3445	21.4618	21.854	21.4706	21.7928	21.8254	21.5504	20.8038	21.4401	20.9064	21.1678	20.9445	20.5166	21.4182	20.9709	21.2832	21.2642	20.8481	20.8677	21.2501	20.8904	21.034	21.2446	21.3482	21.118	20.6157	20.8523	20.5337	20.7742	21.1295	21.5091	21.3448	21.4167	21.2761
A0A075B6J9	IGLV2-18	Immunoglobulin lambda variable 2-18	27.3771	27.3226	27.1452	25.5118	27.4846	27.8225	27.3248	26.1798	27.3617	27.3806	26.2446	27.1245	27.1931	27.3143	27.4551	27.5271	27.4267	27.4535	27.4545	27.4745	27.3991	27.4636	27.4745	27.4274	27.5084	27.2195	27.3288	27.5593	27.3784	27.2973	27.255	27.3343	27.4065	27.297	27.2996	27.1946	27.1936	27.4573	27.3527	27.4375	27.3801	27.2839	27.27	27.3325	27.4816	27.5261	27.4224
A0A075B6P5	IGKV2-28	Immunoglobulin kappa variable 2-28	24.2053	24.332	24.3341	24.5092	24.5102	24.4576	24.3951	24.4443	24.4399	24.5078	24.5197	24.4669	23.2849	23.4162	23.4823	23.6189	23.7449	23.7247	23.617	23.5872	23.6749	23.6895	23.7343	23.7958	23.9945	24.0386	24.1187	24.1353	24.1787	23.9095	24.2068	24.0932	24.042	24.073	24.1105	24.1673	24.1904	24.544	24.7886	24.6947	24.4541	24.6262	24.5917	24.7039	24.8625	24.9046	24.7414
A0A075B6R2	IGHV4-4	Immunoglobulin heavy variable 4-4	20.4436	20.5156	20.5283	20.0867	20.4548	20.6189	20.6429	20.1666	20.2039	20.5398	20.1371	19.9895	20.298	20.3231	20.2807	18.6579	20.0958	20.4255	18.739	20.5609	20.5784	20.1572	20.1325	19.8118	20.894	20.0372	20.6868	19.9134	19.9111	20.1523	20.1972	19.9994	20.143	19.9523	20.3666	20.9015	19.8275	19.4736	20.5634	20.3044	20.4905	19.7833	20.879	19.5819	19.5698	19.0281	19.726
A0A075B6S2	IGKV2D-29	Immunoglobulin kappa variable 2D-29	24.2228	24.1971	24.169	24.1434	24.0915	24.082	24.0937	24.0436	23.8635	23.9545	23.9877	23.8305	21.9568	22.5743	22.4715	22.318	22.3331	22.3373	22.2605	22.1326	22.1148	22.2225	22.0441	22.193	22.7531	22.3772	22.4951	22.4009	22.3782	22.4586	22.3549	22.1709	22.1738	22.2784	22.4293	22.3639	22.7527	22.9238	22.8165	22.9196	22.8087	22.8491	22.9694	23.2617	22.938	22.9019	23.1523
A0A075B6S5	IGKV1-27	Immunoglobulin kappa variable 1-27	26.5867	26.5899	26.5677	26.5208	26.531	26.6263	26.5083	26.634	26.4151	26.4103	26.5038	26.8234	26.2522	26.1393	26.2231	26.0182	26.2733	26.4167	26.2696	26.0986	26.0798	26.0424	26.049	26.3848	26.3819	26.2438	26.3216	26.1932	26.4324	26.3085	26.0507	26.0596	26.2299	26.0914	26.263	26.2467	25.7931	26.1988	26.1105	26.298	26.2555	25.8678	26.3183	26.2369	26.1071	26.2068	26.1773
A0A087WSY6	IGKV3D-15	Immunoglobulin kappa variable 3D-15	23.0617	23.0494	22.9169	22.8509	22.8517	22.8145	22.8879	22.7681	22.4236	22.7594	22.771	22.6727	21.9803	22.6748	22.5751	22.4938	22.5335	22.4822	22.5984	22.6008	22.4893	22.3726	22.5208	22.4056	21.9782	22.0316	21.972	21.9467	22.0803	22.0459	21.8775	21.6618	21.7653	21.8133	21.8535	21.9165	20.7169	22.1469	21.7485	21.8162	21.9364	22.0505	21.9932	22.1522	21.3287	21.932	22.203
A0A087WW87	IGKV2-40	Immunoglobulin kappa variable 2-40	21.1398	21.718	21.2904	21.0225	20.7669	20.7027	21.2541	21.0251	19.9379	20.6638	20.4197	20.3969	20.3428	20.1513	20.0016	19.8338	20.3948	19.6048	20.0096	19.9257	19.8357	19.3344	19.8095	19.9001	19.4168	19.7314	19.9397	19.7964	20.0664	19.6262	19.9882	20.7059	19.9329	20.7548	20.0226	20.3404	19.7896	20.1151	20.0686	20.1635	20.3476	20.1273	19.9011	20.7276	21.2729	20.5817	20.1974
A0A0A0MS14	IGHV1-45	Immunoglobulin heavy variable 1-45	19.5465	19.5121	19.4275	19.3721	19.0171	19.2988	19.1903	19.0453	18.6431	19.0033	18.9929	19.1355	18.8818	19.1738	19.2167	18.7624	18.5551	18.9856	19.0229	18.7987	18.7353	18.6481	18.5908	18.744	19.1337	18.8978	18.8344	18.5907	18.6654	19.1518	18.3202	18.354	18.2747	18.353	18.6182	18.3695	19.5476	19.798	18.8693	19.451	19.8105	19.1849	19.9038	20.0838	19.5188	19.5913	19.9371
A0A0A0MS15	IGHV3-49	Immunoglobulin heavy variable 3-49	27.6546	27.7081	27.7363	27.5458	27.423	27.537	27.6061	27.5579	27.4638	27.5924	27.5141	27.5646	26.5477	27.0205	27.0845	26.8667	27.1561	27.0727	26.9517	26.9315	26.7461	26.8563	26.8704	26.8239	27.2409	27.0688	27.2128	27.1504	27.1903	27.2707	27.1641	27.0523	26.9246	27.0103	27.0531	27.0498	26.3237	26.5914	26.4993	26.4102	26.5536	26.4886	26.5534	26.636	26.5987	26.6342	26.7502
A0A0A0MT36	IGKV6D-21	Immunoglobulin kappa variable 6D-21	19.6893	19.8545	20.1037	19.815	19.9227	19.5655	20.0501	19.992	20.4474	19.7881	19.8766	20.2031	19.2254	18.9725	19.2771	18.9313	19.0913	19.0039	19.0936	18.6759	18.5145	18.9439	18.6087	18.7355	19.4656	19.5105	19.2363	19.3119	19.3572	19.6324	19.3526	18.7764	19.3383	19.3285	19.3826	19.3402	18.6295	18.5656	18.1159	18.2909	17.9167	18.564	18.9945	18.7584	18.6269	18.9319	18.762
A0A0B4J1U7	IGHV6-1	Immunoglobulin heavy variable 6-1	23.8946	24.1288	23.7509	23.8737	23.9707	23.8892	23.7887	23.7367	23.5545	23.6813	23.7799	23.879	22.5838	23.3184	23.6416	22.9938	23.212	23.2876	23.2877	22.7999	22.7815	22.5489	22.9542	22.8021	22.5624	22.7161	22.7366	22.0361	22.6292	22.5093	22.6311	22.5259	22.2275	21.8627	22.3465	22.3738	23.2036	23.1646	23.0005	23.2883	23.3659	23.2868	23.3625	23.4089	23.4926	23.3386	23.5993
A0A0B4J1V0	IGHV3-15	Immunoglobulin heavy variable 3-15	22.2661	22.4224	22.3558	22.2426	22.3437	22.3733	22.2847	22.3671	22.2738	22.3061	22.3763	22.3102	21.9857	22.031	22.0167	22.046	22.0945	22.033	21.9961	22.2385	22.1782	22.1089	22.1852	22.1529	21.6546	20.9049	21.2957	21.7191	21.7991	21.6582	21.7495	21.7211	21.6508	21.6626	21.7075	21.6824	21.5462	21.8098	22.1819	22.1967	22.1505	21.9063	22.066	22.2252	22.2852	22.3605	22.1492
A0A0B4J1V2	IGHV2-26	Immunoglobulin heavy variable 2-26	21.5645	21.4845	21.4567	21.7129	21.8657	21.6503	21.5637	21.1688	21.5488	21.6479	21.568	21.8539	20.8704	20.8287	21.0773	21.2763	21.3352	21.4501	21.384	20.832	21.1821	20.6988	20.9922	21.1541	21.3734	20.6956	21.451	21.595	21.675	21.6388	21.5918	21.0448	21.4877	21.1467	21.3845	21.6127	20.6151	20.9386	21.0741	20.8243	20.7988	20.6365	21.1693	21.1208	21.1129	20.8985	21.1569
A0A0B4J1X5	IGHV3-74	Immunoglobulin heavy variable 3-74	27.6559	27.6115	27.5519	27.4846	27.5044	27.5568	27.4656	27.377	27.3449	27.3749	27.3314	27.2927	26.7719	26.9643	26.9619	26.8585	26.9242	26.8225	26.8124	26.8016	26.7216	26.8632	26.7101	26.7284	26.9764	26.7428	26.9454	26.7754	26.8766	26.9912	26.7002	26.8356	26.7738	26.2849	26.6858	26.6769	26.0921	26.3992	26.2886	26.425	26.4963	26.5266	26.5949	26.7003	26.5026	26.5839	26.7012
A0A0B4J1X8	IGHV3-43	Immunoglobulin heavy variable 3-43	21.0829	21.4113	21.247	21.2953	21.3559	21.011	21.1446	21.0617	21.1462	21.1371	21.2513	21.1778	21.305	20.8397	21.4097	20.8636	21.3146	20.8202	20.6508	21.2947	21.0834	21.0067	20.9831	21.0334	20.8859	20.5805	20.6697	20.5666	20.2303	20.2602	20.351	20.2841	20.2556	19.9849	20.2143	20.2841	21.139	21.4419	20.8461	21.0677	21.3251	20.9715	21.358	21.7155	21.4339	21.2641	21.4548
A0A0B4J1Y9	IGHV3-72	Immunoglobulin heavy variable 3-72	25.5735	25.5412	25.6223	25.5272	25.3929	25.5702	25.6265	25.3546	25.3393	25.4047	25.4276	25.4223	24.9421	25.1089	24.9839	24.8847	24.9374	24.9501	24.9247	24.8934	24.827	24.7499	24.8334	24.832	24.9981	24.7597	24.9926	24.7885	24.8848	24.9946	24.7516	24.7253	24.6042	24.588	24.8252	24.8246	24.6064	24.9061	24.5809	24.8036	24.9183	24.8383	25.0198	25.0558	24.9289	24.9069	25.2356
A0A0B4J2D9	IGKV1-13	Immunoglobulin kappa variable 1D-13	23.3698	23.6418	23.61	23.2367	22.9964	23.2067	23.1189	23.267	23.0168	23.1142	23.4255	23.1787	22.7113	22.8619	22.8134	22.5978	22.819	22.8643	22.5398	22.3789	22.4493	22.6008	22.7158	22.6878	22.8477	22.8051	22.9376	22.2921	22.5936	22.6212	22.324	22.5184	22.3771	22.492	22.6222	22.6727	22.3427	22.3417	22.4008	22.5466	22.8605	22.7085	22.8906	23.0524	22.7138	22.609	22.9544
A0A0C4DH25	IGKV3D-20	Immunoglobulin kappa variable 3D-20	23.8423	23.8873	23.9114	23.9197	23.9046	23.903	23.7747	23.8537	23.6275	23.7438	23.7523	23.6754	23.0068	23.1272	23.0721	22.9893	23.0821	23.0684	22.9406	22.9767	22.9406	22.9163	22.9497	22.9627	22.9429	23.2493	23.1861	22.7777	23.1237	23.1709	23.0953	23.1997	23.0219	22.952	23.1452	23.0479	22.5171	22.8553	22.9673	22.9194	22.8664	22.9009	22.8253	23.0068	23.1109	23.0559	23.1051
A0A0C4DH30	IGHV3-16	Probable non-functional immunoglobulin heavy variable 3-16	20.1	20.0041	20.0405	19.9905	19.8948	19.8755	19.8058	19.6956	19.5825	19.8307	19.6954	19.7293	19.0633	18.9298	18.7237	18.6525	18.7657	18.5429	18.9191	18.6792	18.6575	18.3268	18.6885	18.4668	19.2163	19.0571	18.8513	18.6444	18.6809	18.9041	18.6161	18.6217	18.516	18.5049	18.7032	18.3962	18.8875	19.053	18.7729	18.8118	19.205	18.88	19.3048	19.4394	18.9715	19.0109	19.2045
A0A0C4DH34	IGHV4-28	Immunoglobulin heavy variable 4-28	23.8444	24.0588	23.8443	24.0184	23.8358	23.9078	23.8106	23.7769	23.5879	23.741	23.7322	23.6305	22.924	23.0352	23.0116	22.7727	22.9127	22.7985	22.7043	22.7773	22.7622	22.7917	22.9095	22.6931	22.8264	22.8458	22.9786	22.6781	22.7521	22.8475	22.5782	22.4168	22.6155	22.5839	22.8135	22.7712	23.1861	23.3521	23.0628	23.1768	23.1754	23.2593	23.3769	23.5074	23.2074	23.3487	23.4193
A0A0C4DH35	IGHV3-35	Probable non-functional immunoglobulin heavy variable 3-35	21.3243	21.165	21.1864	21.0843	20.8887	20.8419	20.8416	20.7175	20.4927	20.7673	20.5193	20.7393	20.0759	20.3452	20.2973	19.9493	20.1671	20.1238	20.0021	20.0046	19.4372	19.8985	19.982	19.8495	20.833	20.6577	20.6338	20.3321	20.4697	20.8292	20.2593	20.2283	20.2538	20.2059	20.4625	20.2874	20.835	20.9068	20.2001	20.4541	20.9921	20.5898	21.0834	21.1481	20.4111	20.5384	21.0816
A0A0C4DH36	IGHV3-38	Probable non-functional immunoglobulin heavy variable 3-38	24.8528	24.7873	24.8483	24.716	24.4991	24.5669	24.5895	24.6524	24.4216	24.4897	24.6148	24.5527	24.2065	24.2276	24.2151	24.2596	24.1283	24.3921	24.1875	24.0219	23.9283	24.0285	23.956	24.3496	24.4506	24.2179	24.4055	24.6746	24.4336	24.5702	24.2752	24.2161	24.1402	24.098	24.2755	24.1848	24.1258	24.2989	24.1916	24.3652	24.4056	24.239	24.4027	24.5704	24.3599	24.4086	24.4316
A0A0C4DH38	IGHV5-51	Immunoglobulin heavy variable 5-51	21.495	21.5987	21.6205	21.6596	21.513	21.4572	21.4177	21.154	21.3369	21.3501	21.4232	21.33	21.0469	21.1049	20.7727	20.8102	20.8635	20.7197	20.8699	20.7649	20.4452	20.5519	20.4744	20.7798	20.8898	20.77	21.1147	20.6849	20.8426	20.9251	20.8999	20.6939	20.6062	20.4127	20.6814	20.8443	21.0051	21.1737	20.9794	21.0421	21.0128	21.1061	21.0451	21.2605	21.0266	21.1495	21.216
A0A0C4DH43	IGHV2-70D	Immunoglobulin heavy variable 2-70D	24.524	24.6933	24.4067	24.5171	24.4237	24.2834	24.2373	23.9308	24.0481	24.1721	24.0108	24.2188	23.0477	23.6133	23.2104	23.3826	23.3519	23.578	23.347	23.3003	23.1794	23.3621	23.3685	23.1482	23.6252	23.7142	23.4909	23.5055	23.3524	23.542	23.4744	23.3729	23.419	23.4169	23.5386	23.4426	23.733	23.8429	23.5981	23.9579	23.5502	24.0524	23.8029	24.0718	23.8838	23.8734	24.0264
A0A0C4DH67	IGKV1-8	Immunoglobulin kappa variable 1-8	20.8999	21.0338	21.3474	21.1273	20.9464	21.1181	20.6149	20.481	20.4653	20.9845	20.6679	20.8166	20.5214	20.6207	20.8875	20.6804	20.7273	20.8396	20.6678	20.4681	20.6727	20.6491	20.5383	20.335	20.5308	20.6848	20.6254	20.4292	20.3716	20.5427	20.7608	20.8089	20.5673	20.5436	20.6943	20.5668	19.98	20.2147	20.382	20.3712	20.359	20.5419	20.0217	20.4702	20.5641	20.6381	20.5166
A0A0C4DH68	IGKV2-24	Immunoglobulin kappa variable 2-24	26.6924	26.6834	26.6438	26.6125	26.4676	26.5695	26.3628	26.5845	26.4125	26.5113	26.4357	26.4959	26.2717	26.1248	25.9733	26.3428	26.376	26.4136	25.9239	26.2341	26.3279	26.3517	26.2736	26.2931	26.6802	26.6991	26.5214	26.5627	26.6053	26.6029	26.4371	26.2919	26.3124	26.3914	26.5568	26.4628	25.2251	26.038	25.995	26.2568	26.1277	25.5476	26.1475	26.1493	26.0045	25.8306	25.8612
A0A0C4DH72	IGKV1-6	Immunoglobulin kappa variable 1-6	21.5055	21.5342	21.5757	21.4397	21.4886	21.2776	21.3969	21.3358	21.2009	21.3201	21.342	21.3785	21.2989	21.6418	21.3684	21.4832	21.4892	21.5745	21.3163	21.4844	21.2361	21.3814	21.4048	21.4284	21.1927	21.2097	21.21	21.1688	21.252	21.1301	20.9444	20.734	21.0246	21.0142	21.0209	21.1856	20.6463	21.3518	20.835	21.2183	21.3986	21.1806	21.4734	21.4245	21.284	21.2821	21.4302
A0M8Q6	IGLC7	Immunoglobulin lambda constant 7	24.6923	24.6176	24.6976	24.6663	24.7244	24.6917	24.6189	24.7602	24.6205	24.6408	24.7151	24.7718	24.3102	24.5606	24.5283	24.574	24.4157	24.4497	24.4264	24.5022	24.5689	24.5656	24.5117	24.4932	24.5838	24.3603	24.5136	24.4296	24.6486	24.4315	24.4374	24.5198	24.5332	24.5716	24.592	24.5575	24.0658	23.9429	24.1522	24.3765	24.3529	24.0531	24.3836	24.3287	24.4904	24.5066	24.5086
B9A064	IGLL5	Immunoglobulin lambda-like polypeptide 5	27.6999	27.5501	27.7403	27.794	27.7294	27.7263	27.6382	27.6873	27.7422	27.7086	27.6997	27.6734	27.1648	27.4072	27.1395	27.2733	27.288	27.3354	27.3174	27.2639	27.3555	27.2609	27.3827	27.3895	27.3775	27.3312	27.4735	27.4425	27.5458	27.3309	27.428	27.5489	27.47	27.408	27.3236	27.4468	26.6015	26.8697	27.0674	26.9756	27.0099	26.8778	27.1087	27.0478	27.2688	27.2569	27.1545
O00151	PDLIM1	PDZ and LIM domain protein 1	23.5295	23.3524	23.4549	23.2918	23.7585	23.0634	24.0124	22.2874	23.7038	23.1588	23.5491	22.4856	23.7102	23.5248	23.241	23.592	23.599	23.3601	23.4826	23.5254	23.2402	23.5397	23.4644	21.8724	23.0246	23.4514	23.6487	23.6694	23.7339	23.7212	23.7081	23.8595	23.1017	23.5698	23.8299	23.8914	22.8861	23.2946	23.9451	23.7981	22.6054	23.7354	23.5426	23.4225	23.571	23.5678	23.3959
O00187	MASP2	Mannan-binding lectin serine protease 2	22.2017	22.2228	22.2655	22.0606	22.2716	22.2183	22.0989	22.1099	22.2866	22.1719	21.9514	21.9219	22.4124	22.2392	22.5415	22.4355	22.4522	22.4351	22.6269	22.3291	22.3372	22.309	22.3209	22.2424	22.3264	22.1567	22.4404	22.5882	22.5789	22.3575	22.3118	22.1039	22.3769	22.4107	22.3105	22.3199	22.277	22.3023	22.2362	22.2827	22.1662	22.4774	22.3154	22.308	22.1591	22.2469	22.3753
O00391	QSOX1	Sulfhydryl oxidase 1	26.5305	26.5649	26.5824	26.6297	26.4423	26.417	26.4471	26.3911	26.4071	26.3803	26.3384	26.2911	26.3985	26.4621	26.2654	26.3087	26.1902	26.2272	26.1867	26.1534	26.0093	25.9754	26.0845	26.102	26.2494	26.2365	26.3259	26.2032	26.4014	26.3206	26.2158	26.1279	26.2417	26.2501	26.2701	26.2854	26.5125	26.4681	26.4201	26.4962	26.3471	26.3989	26.4184	26.1919	26.1813	26.4895	26.4931
O00533	CHL1	Neural cell adhesion molecule L1-like protein	22.5345	22.2814	22.7025	22.5929	22.5186	22.3953	22.3161	22.515	22.5482	22.4104	22.3237	22.3647	22.2169	22.4127	22.5035	22.6221	22.5026	22.7417	22.5859	22.4566	22.7013	22.7029	22.8171	22.8294	22.0119	22.3204	22.3574	22.1424	22.2398	22.3968	22.2919	22.5779	22.3307	22.1568	22.1603	22.0462	22.3824	22.3424	22.2632	22.1709	22.2941	22.5597	22.497	22.539	22.7502	22.3911	22.5721
O14786	NRP1	Neuropilin-1	26.1439	25.6225	25.7112	26.0338	26.2476	26.034	25.8078	25.9049	26.1414	25.9286	25.9453	25.8607	25.8115	25.4879	26.221	25.5853	25.8388	25.9086	25.8534	25.4944	25.8609	25.5621	25.7025	25.8512	25.636	25.5641	25.6073	25.2025	25.6399	25.5716	25.452	25.4991	25.4193	25.3346	25.2191	25.7055	25.344	24.6804	25.4806	25.3888	25.2565	25.0953	25.3719	25.5191	25.3845	25.2474	25.6838
O14791	APOL1	Apolipoprotein L1	20.8291	20.7981	20.7573	20.597	20.7304	20.7374	20.802	20.6915	20.601	20.7206	20.6573	20.6503	21.2925	21.2797	21.1138	21.1507	21.0467	21.1381	21.1904	21.0641	20.9471	20.8681	20.998	20.9576	21.5142	21.2166	21.2141	21.2823	21.3832	21.3026	21.3089	21.3157	21.1975	21.2822	21.4025	21.4074	20.6301	20.639	20.5456	20.7067	20.7035	20.5912	20.5416	20.8407	20.8153	20.793	20.778
O15031	PLXNB2	Plexin-B2	24.4124	24.5247	24.5741	24.3896	24.4041	24.6608	24.3183	24.451	24.4546	24.756	24.6267	24.1876	23.946	24.6071	24.5429	24.606	24.5979	24.6294	24.5486	24.6611	24.4825	24.2694	24.543	24.57	24.5625	23.7302	24.2557	24.4634	24.754	24.2917	24.2554	24.3733	24.5633	24.3497	24.5987	24.2515	24.2133	23.9502	24.3517	24.4911	24.3958	24.4147	24.1721	24.2506	24.4337	24.449	23.9629
O15143	ARPC1B	Actin-related protein 2/3 complex subunit 1B	24.1313	24.2299	24.3689	24.3284	24.3649	24.3452	24.2568	24.4953	24.4074	24.3924	24.3989	24.4045	23.7543	23.9827	23.3969	24.1292	23.744	23.9813	23.5718	23.3987	23.9794	23.4422	24.0823	23.6628	24.0278	23.4504	23.4257	23.8467	24.0986	23.7148	23.928	23.6888	23.8492	23.9833	23.9893	23.8678	24.067	24.0182	23.9982	23.8368	23.9301	23.9411	24.0058	23.9557	23.9797	24.0909	23.9387
O15394	NCAM2	Neural cell adhesion molecule 2	24.8147	24.9648	24.9206	24.6783	24.8103	24.9765	24.7702	24.3914	24.9828	25.0882	24.9733	24.8921	24.9398	24.6042	24.9921	24.9349	24.9232	24.7808	24.7312	24.6034	24.6424	25.1076	24.486	25.0394	25.1028	24.7525	24.9234	24.9602	25.0355	24.9925	24.9679	24.7001	25.0997	24.8138	24.7939	25.0308	24.6157	24.7628	22.1515	25.0684	24.7417	24.7779	24.4336	24.4698	24.1397	24.5931	24.0567
O15511	ARPC5	Actin-related protein 2/3 complex subunit 5	21.7935	21.4185	22.3981	21.5649	21.8542	22.4999	22.0666	22.0414	21.5597	22.0951	22.0042	22.48	22.1946	21.4105	21.6501	21.7021	21.7351	21.7058	21.5722	21.5004	21.9754	21.9382	21.9278	21.887	21.7776	22.196	21.8485	21.6886	22.0393	21.9523	21.9882	21.2764	22.0191	22.0935	22.026	22.2158	21.5839	22.0905	21.0699	20.7815	21.667	21.7826	21.4786	21.3617	21.5522	21.4995	21.7453
O43157	PLXNB1	Plexin-B1	28.4883	28.6705	28.5309	28.6186	28.6032	28.586	28.4373	28.4041	29.1806	28.4698	28.5285	28.4274	28.2538	28.4456	28.4106	28.5831	28.5291	28.4226	28.3902	28.0418	28.44	28.5781	27.9698	28.3858	28.2081	27.7196	28.1881	28.3947	28.0323	27.5703	27.9998	27.7247	28.5172	28.1107	28.2431	28.3545	27.9642	28.0523	28.2737	27.9118	28.0713	28.4287	28.0706	28.316	28.2796	28.0712	28.1496
O43505	B4GAT1	Beta-1,4-glucuronyltransferase 1	23.1686	22.8192	23.0802	21.9691	23.0575	22.8375	22.94	22.9581	22.7135	22.3048	22.0939	22.0814	22.8895	23.7692	23.7059	23.238	23.5591	23.6993	23.927	23.3612	23.3385	23.3443	23.3083	22.9925	21.7681	21.8517	22.2788	22.8489	22.7297	22.5765	22.779	22.4799	22.3994	22.7292	22.0067	22.2728	23.1796	23.32	22.8589	22.9903	23.0177	22.7324	23.5019	23.3794	22.8133	23.0001	23.2512
O43866	CD5L	CD5 antigen-like	23.3456	23.3369	23.4134	23.4024	23.308	23.327	23.3319	23.297	23.2136	23.2632	23.2655	23.2271	23.5388	24.0598	24.1176	24.0697	24.0293	24.0795	24.0484	23.7598	23.7485	23.7987	23.8348	23.8056	22.8439	22.6837	22.8022	22.7321	22.7833	22.7513	22.7455	22.6902	22.7616	22.7567	22.7496	22.7446	22.7596	23.2235	23.1184	23.1406	23.0714	23.1473	23.123	23.2729	23.3047	23.2899	23.2641
O60462	NRP2	Neuropilin-2	23.8611	24.0997	24.0007	24.1008	23.7042	23.7159	23.9746	23.9917	23.6631	23.6341	23.416	23.8398	24.0469	23.9354	23.7183	23.8535	23.8738	23.6292	23.655	23.9012	23.6862	23.4098	23.7935	23.6795	23.8672	24.202	23.8487	23.7958	24.0463	23.9535	23.9505	23.9867	23.9767	23.8156	24.1815	24.0538	24.3336	24.0087	23.8374	24.1591	24.0132	24.1604	23.8961	24.044	23.4595	24.056	24.0235
O75015	FCGR3B	Low affinity immunoglobulin gamma Fc region receptor III-B	25.8884	25.7242	25.9149	25.8429	25.6479	25.8024	25.776	25.9063	25.9828	25.8172	25.9776	25.9436	25.7551	25.7828	25.6862	25.6654	25.9275	25.8391	25.6389	25.73	25.6675	25.8636	25.7283	25.8429	25.0943	25.5316	25.7044	25.7194	25.8447	25.6427	25.6453	25.5393	25.6704	25.694	25.78	25.5023	25.5003	25.5881	25.7891	25.6677	25.4987	25.6335	25.7032	25.6294	25.6049	25.425	25.6817
O75083	WDR1	WD repeat-containing protein 1	27.9585	28.1497	28.124	27.9872	28.2673	28.3159	28.3173	28.1897	28.3187	28.1544	28.0723	27.951	27.905	27.3839	27.7053	28.1465	28.2675	28.1991	27.9054	28.0023	28.0944	27.9051	27.946	27.728	27.7227	27.8408	27.869	27.9844	28.0723	27.899	28.0155	28.0972	27.8596	27.8723	27.7898	27.8653	28.1619	27.7265	28.2296	28.0879	27.8863	28.0561	27.7772	27.9499	27.9041	27.984	27.8903
O75223	GGCT	Gamma-glutamylcyclotransferase	21.3094	21.5448	20.889	21.1446	21.1176	20.9034	20.9308	20.8593	20.8421	21.0196	20.8126	20.798	20.8663	21.0007	21.6264	20.6957	20.9482	21.4045	21.887	20.8318	20.8152	20.7474	20.8704	20.8608	21.5227	21.467	22.301	21.9242	21.6713	22.0774	21.4019	21.3372	21.3147	21.265	21.3594	21.5183	22.1328	22.2638	21.2142	21.6733	21.7659	21.8823	22.5657	21.8754	21.5266	21.6862	21.6816
O75636	FCN3	Ficolin-3	23.9498	23.8891	23.936	23.6336	23.6289	23.7721	23.8141	23.6578	23.4747	23.8846	23.5741	23.6099	24.4402	24.4812	24.5754	24.4376	24.4596	24.7005	24.2946	24.2061	24.3404	24.1057	24.3246	24.301	24.0205	23.9267	23.9495	23.7105	23.9712	23.9333	23.6529	23.6342	23.8065	23.8742	23.8659	23.7551	24.0577	24.1222	24.0352	24.0664	24.0642	24.1876	23.8958	24.0986	24.1015	24.1296	24.078
O75882	ATRN	Attractin	24.5995	24.6254	24.6656	24.6733	24.5469	24.4785	24.5756	24.4245	24.4574	24.524	24.5279	24.4557	24.6019	24.7325	24.5766	24.513	24.537	24.4113	24.4117	24.5197	24.5079	24.3592	24.4431	24.4292	24.8885	24.8451	24.7018	24.6891	24.8536	24.7405	24.7077	24.6458	24.5891	24.6276	24.762	24.7046	24.7309	24.9702	24.6878	24.7899	24.9763	24.6982	24.8289	25.0024	24.8582	24.8647	25.0096
O94985	CLSTN1	Calsyntenin-1	27.368	27.0106	27.4877	27.481	27.1955	27.2838	27.2089	27.0374	27.4452	27.304	27.0738	27.1681	26.8851	27.3331	27.3201	26.9615	27.2946	27.3338	27.3002	27.353	27.3456	27.2397	27.1694	27.0603	27.4247	27.327	27.1122	27.1882	27.3134	27.2671	27.2791	27.0511	27.4476	27.1792	27.2532	27.2353	27.2403	26.9078	27.2129	27.4756	27.3031	27.3287	27.4142	27.296	27.384	27.1649	27.2123
O95445	APOM	Apolipoprotein M	23.1161	23.0518	23.0879	23.0799	22.8888	22.7908	22.9133	22.7727	22.7514	22.8767	22.7706	22.8701	23.0378	23.1552	23.0681	22.9605	23.0096	22.9597	22.7453	22.8652	22.9107	22.7873	22.6589	22.8192	23.2574	23.131	22.9208	22.7588	22.99	23.0404	22.9333	22.931	22.9416	22.8747	22.979	23.0378	23.4275	23.4474	23.1177	23.2569	23.2	23.164	23.2673	23.4784	23.2742	23.3435	23.2969
O95479	H6PD	GDH/6PGL endoplasmic bifunctional protein	20.4394	20.4069	20.764	20.4707	20.5348	20.5063	20.5936	20.4712	20.564	20.6629	20.4606	20.422	20.5476	20.6133	20.6738	20.9815	20.6889	20.2945	20.6126	20.7808	20.4041	20.6129	20.4763	20.6396	20.734	20.51	19.8377	19.8871	20.4392	19.9975	20.4788	20.7708	20.2841	20.7718	20.6309	20.3118	20.1233	20.1747	20.3843	20.2107	19.7899	18.982	21.1596	20.2318	20.1837	20.2694	19.955
O95497	VNN1	Pantetheinase	24.8362	24.3272	24.4213	24.1354	23.8783	24.1767	23.9026	23.956	24.1417	23.9578	23.8871	24.0289	24.437	24.2574	24.2888	23.6136	24.1693	23.9618	24.0099	23.8832	23.8995	24.0953	23.8556	23.8742	24.2992	24.6542	24.5879	24.0217	24.3528	24.4794	23.9102	23.8694	23.9347	24.0038	23.813	24.2456	25.0463	24.5037	23.9682	24.8082	25.1053	24.4631	24.0358	24.2315	24.1914	24.1361	24.4221
O95810	CAVIN2	Caveolae-associated protein 2	28.2342	28.5156	28.3211	28.5809	28.4772	28.7394	28.5909	28.7299	28.6207	28.6817	28.5631	28.419	28.3255	28.1109	28.343	28.3177	28.1139	28.0268	28.2662	28.3041	28.471	28.3085	28.3083	28.3633	28.2278	27.4938	28.1966	28.5117	28.3851	28.2984	28.1722	28.1287	28.3888	28.2068	28.1807	28.3794	28.0356	26.5067	28.1169	27.6285	26.1329	27.281	27.8659	27.5616	27.9589	27.692	28.1359
P00338	LDHA	L-lactate dehydrogenase A chain	21.972	20.6328	20.8178	20.8379	21.5802	20.9476	20.705	20.7845	21.4003	20.7997	20.9296	20.5366	20.3899	19.9335	20.176	20.6738	20.2346	20.7517	21.1317	20.6011	20.4391	20.3937	20.0897	20.3041	20.5833	20.8407	20.7929	20.3507	20.7519	20.6195	20.7812	20.9269	20.7668	20.4785	20.5927	20.3552	20.0099	21.3195	21.0632	20.5101	21.001	21.652	21.138	20.4499	20.9068	21.1178	21.1349
P00450	CP	Ceruloplasmin	25.1366	25.1024	25.2025	25.1867	25.1534	25.1815	25.1222	25.0376	25.0286	25.0321	25.0189	25.0611	25.3863	25.3694	25.3146	25.3896	25.4095	25.3256	25.2883	25.3212	25.3394	25.3363	25.3396	25.3061	25.3874	25.2491	25.2452	25.2789	25.3538	25.244	25.3994	25.3131	25.3068	25.3045	25.2924	25.2888	24.8304	24.7656	24.9652	24.9341	24.8577	24.8893	24.757	24.8145	24.9492	24.9433	24.8866
P00488	F13A1	Coagulation factor XIII A chain	25.0992	24.9794	25.2214	25.0702	25.2522	25.2268	25.0851	25.1222	25.1535	25.1901	25.1544	25.0801	25.3055	25.2703	25.743	25.1676	25.2533	25.4651	25.7423	25.1518	25.4044	25.3664	25.2184	25.3329	25.2595	25.2673	25.6661	25.2903	25.327	25.5597	25.0568	25.2584	25.3376	25.1505	25.2988	25.2254	25.1215	25.7555	25.3479	25.2806	25.2959	25.3526	25.874	25.4501	25.44	25.3142	25.392
P00533	EGFR	Epidermal growth factor receptor	23.3235	23.4494	23.2026	22.8012	23.0673	23.1732	23.0064	23.1015	22.3804	23.0405	23.0187	22.9939	22.3145	23.1047	21.8124	22.7283	22.2884	22.7518	22.4792	22.4974	22.2264	22.7919	22.8366	22.8171	22.5665	22.7834	21.8849	21.4852	23.0064	22.8628	22.6027	22.3249	21.6188	23.4393	21.7933	22.9132	22.3042	22.6337	22.7278	22.641	22.9817	22.8313	22.4633	23.0722	22.7486	22.4085	23.0947
P00558	PGK1	Phosphoglycerate kinase 1	25.3694	25.454	25.299	25.446	25.5242	25.4668	25.516	25.475	25.5494	25.6019	25.5445	25.5784	25.5755	25.1943	25.3507	25.5425	25.5925	25.437	25.2907	25.5735	25.2005	25.5017	24.9568	25.2164	25.4066	25.1728	25.5393	25.512	25.5603	25.0104	25.4531	25.5468	25.4721	25.4041	25.4959	25.3858	26.1169	25.9342	25.4163	25.571	25.3571	25.4854	25.4287	25.5968	25.4725	25.5255	25.6465
P00734	F2	Prothrombin	24.6564	24.6578	24.6724	24.5628	24.6	24.6691	24.6885	24.7148	24.621	24.6893	24.6871	24.6591	24.7256	24.7268	24.6699	24.6597	24.7126	24.6423	24.6113	24.7275	24.7595	24.7031	24.7515	24.7348	24.8867	24.7413	24.7266	24.755	24.8733	24.7518	24.8261	24.8055	24.8138	24.7832	24.8559	24.8639	24.4437	24.3848	24.5272	24.5161	24.4843	24.4668	24.3797	24.5355	24.5787	24.565	24.563
P00736	C1R	Complement C1r subcomponent	25.6461	25.6794	25.7502	25.6687	25.6989	25.8165	25.8375	25.7871	25.7641	25.7158	25.6984	25.788	25.4221	25.5688	25.5127	25.4464	25.4628	25.6098	25.5903	25.6107	25.524	25.523	25.5701	25.579	25.4931	25.2434	25.3254	25.319	25.4202	25.4469	25.4897	25.4396	25.4403	25.4004	25.4072	25.4759	25.5299	25.563	25.5601	25.5501	25.5123	25.6686	25.5726	25.5641	25.572	25.5475	25.5331
P00738	HP	Haptoglobin	26.5613	27.0031	27.0655	27.0378	27.0281	27.3125	27.2995	27.3288	27.0746	27.2729	27.1791	27.2521	28.1854	27.6657	27.5394	27.6889	27.639	27.6785	27.6672	27.8229	27.7761	27.8001	27.7889	27.8837	27.4595	27.5662	27.5524	27.6875	27.7378	27.7205	28.0025	28.0928	28.001	28.0385	28.0142	28.0742	26.2857	22.9448	22.7615	22.7656	22.6672	24.9965	25.6768	26.5653	25.9234	26.5296	26.5153
P00739	HPR	Haptoglobin-related protein	25.6035	25.7858	25.8312	25.8666	25.8268	25.8053	25.875	25.8736	25.8447	25.8027	25.8111	25.7954	26.1186	25.832	25.7933	25.8264	25.8676	25.8425	25.7166	25.7479	25.822	25.9683	25.9399	25.858	26.9038	26.6652	26.7001	26.7841	26.8602	26.7165	26.9047	26.7662	26.8401	26.8656	26.8511	26.8417	25.0224	25.2188	25.3532	25.3679	25.2504	25.171	25.1822	25.6155	25.4438	25.507	25.3013
P00740	F9	Coagulation factor IX	21.7269	21.6261	21.5003	21.6447	21.4885	21.6464	21.4606	21.6358	21.7021	21.5817	21.564	21.7091	21.8153	21.9317	21.911	21.9243	22.0407	21.9623	21.8579	21.8362	21.7202	21.6465	21.7204	21.8243	21.8464	22.0672	22.0855	21.9297	22.1865	22.2478	22.0258	21.8255	21.9124	21.7539	22.134	21.9797	22.192	21.9346	21.7438	21.9562	22.1278	22.0914	21.9097	22.0258	21.8759	22.0465	22.0891
P00742	F10	Coagulation factor X	25.0457	24.96	25.1612	25.1296	24.9879	25.1519	25.0501	25.077	24.6684	25.221	25.0249	25.2403	25.3693	25.3478	25.2496	25.1601	25.3301	25.361	25.2119	25.1204	24.9524	25.117	25.0261	25.2786	25.552	25.4861	25.3724	25.4439	25.6106	25.4251	25.3398	25.4175	25.471	25.4897	25.5357	25.4507	25.3604	25.5858	25.3589	25.4893	25.468	25.4109	25.4603	25.4267	25.4279	25.4199	25.5076
P00746	CFD	Complement factor D	20.3052	20.3299	20.2812	19.9644	20.1364	20.285	19.6607	20.0575	19.9667	20.07	19.5957	20.4478	20.323	20.2783	20.2154	19.8856	20.1797	20.1961	19.9186	20.0549	19.9263	19.9397	19.8432	19.7064	19.9889	20.2793	19.7372	19.9784	19.6623	20.2085	20.2329	20.0146	20.2566	20.2247	20.2374	20.3192	20.3974	20.1201	19.5521	20.3821	20.2614	20.3319	20.1726	20.4444	20.1078	20.2552	20.0493
P00747	PLG	Plasminogen	23.6111	23.7881	23.6498	23.6337	23.6495	23.6128	23.659	23.6653	23.5853	23.6635	23.5878	23.6135	23.5795	23.6532	23.9423	23.4601	23.4589	23.7775	23.8581	23.4165	23.3959	23.4042	23.4159	23.4614	23.9125	23.6421	24.4896	23.9618	23.8442	24.3317	23.8178	23.7517	23.7817	23.7838	23.8371	23.8524	23.7858	23.8831	23.6153	23.6828	23.6387	23.5309	24.1279	23.6862	23.6055	23.5991	23.6325
P00748	F12	Coagulation factor XII	23.4262	23.3217	23.3804	23.3101	23.2278	23.2969	23.2703	23.24	23.2961	23.2487	23.23	23.1972	24.3087	24.3696	24.4369	24.2596	24.289	24.3782	24.427	24.2438	24.1275	24.227	24.101	24.2221	25.0074	24.8816	25.2898	25.0265	25.0608	25.2416	24.966	24.9925	24.9272	24.9463	25.0265	25.0603	24.7209	24.7871	24.7374	24.7045	24.7259	24.6699	24.9206	24.694	24.777	24.7787	24.7463
P00751	CFB	Complement factor B	25.5786	25.5716	25.6205	25.6254	25.66	25.6672	25.6532	25.5759	25.5643	25.5597	25.51	25.674	25.9023	25.7013	25.5902	25.6999	25.6913	25.6191	25.5927	25.7381	25.7503	25.7875	25.7444	25.7559	25.8889	25.756	25.722	25.7872	25.8593	25.8286	26.0135	25.9487	25.9246	25.9518	25.9528	25.9955	25.6282	25.4656	25.6126	25.5524	25.5637	25.6665	25.5391	25.4635	25.5053	25.5407	25.4667
P00915	CA1	Carbonic anhydrase 1	25.3231	24.5058	24.3134	24.2521	24.5496	24.1306	23.9849	23.9756	24.2417	23.8599	24.4783	24.5597	23.7214	23.5983	23.6596	23.9329	23.68	23.6985	23.5523	23.5026	23.5387	23.511	23.5546	23.4296	23.6241	23.2678	23.5144	23.1434	23.573	23.3333	23.3557	23.3872	23.6403	23.14	23.0569	23.1557	23.9524	24.1777	23.7417	23.7434	23.9955	23.6471	23.8437	23.9375	24.4384	23.9807	23.8228
P00918	CA2	Carbonic anhydrase 2	20.7253	20.381	20.3481	20.3171	20.3655	20.4489	20.2764	20.2281	20.1791	20.4356	20.5948	20.6929	20.7492	20.8418	21.6604	20.8115	20.647	21.254	21.5195	20.7413	20.5194	20.6628	20.5026	20.4839	20.8594	20.7406	21.7632	20.6075	20.674	21.5956	20.7088	20.6789	20.7384	20.665	20.7299	20.7251	21.1442	21.0527	20.9111	19.8506	20.8614	21.0765	21.7801	21.1438	21.1902	20.6777	20.8119
P01008	SERPINC1	Antithrombin-III	24.723	24.7081	24.7196	24.7369	24.6856	24.7169	24.6848	24.6757	24.6489	24.6999	24.6548	24.6904	24.6965	24.7764	24.6794	24.7079	24.7582	24.7636	24.6111	24.7693	24.6943	24.6983	24.7117	24.692	24.7914	24.7654	24.7315	24.7577	24.8146	24.7566	24.8307	24.843	24.8171	24.7853	24.8455	24.8428	24.8983	24.8087	24.9378	24.9527	24.8881	24.9627	24.7355	24.8606	24.9697	24.9886	24.94
P01009	SERPINA1	Alpha-1-antitrypsin	26.7553	26.5521	26.8208	26.8148	26.722	26.8431	26.6976	26.8097	26.9547	26.8233	26.8297	26.8892	26.5874	26.4918	26.1335	26.5697	26.5169	26.4036	26.31	26.5715	26.562	26.655	26.6625	26.6234	26.2694	26.3356	26.1009	26.3008	26.3646	26.1062	26.4204	26.383	26.4269	26.4436	26.3474	26.3628	26.3861	26.2706	26.647	26.5222	26.4673	26.5479	26.3656	26.3822	26.4433	26.4467	26.4468
P01011	SERPINA3	Alpha-1-antichymotrypsin	25.5368	25.4879	25.5649	25.5769	25.5616	25.5576	25.4998	25.4495	25.3988	25.4319	25.4526	25.478	26.0445	25.7699	25.7904	25.738	25.873	25.7545	25.7795	25.7538	25.7055	25.6926	25.7692	25.725	25.6649	25.6851	25.7139	25.6384	25.7092	25.7238	25.7532	25.6439	25.6186	25.5895	25.6657	25.6562	25.7825	25.881	25.9926	26.0913	26.0148	26.063	26.0856	26.0036	26.0328	26.0124	26.0113
P01019	AGT	Angiotensinogen	25.1271	25.0035	24.9553	25.0321	24.9319	25.0589	25.0244	24.9919	24.9112	24.9692	25.0187	24.9026	25.358	25.5555	25.5417	25.3271	25.5105	25.4412	25.4734	25.5103	25.4846	25.3712	25.3782	25.3111	25.3182	25.6591	25.6639	25.6079	25.6371	25.5883	25.4948	25.4516	25.4152	25.2271	25.3788	25.3671	25.6808	25.5212	25.4788	25.5608	25.5789	25.483	25.4579	25.6182	25.5128	25.5632	25.5278
P01023	A2M	Alpha-2-macroglobulin	28.4181	28.4394	28.4666	28.4777	28.4394	28.4178	28.3939	28.3606	28.3391	28.3641	28.3581	28.3616	28.1871	28.3742	28.2878	28.2888	28.3255	28.2882	28.2098	28.2521	28.2715	28.2429	28.2567	28.2681	28.0436	28.0273	27.937	27.9106	27.9989	27.9729	27.979	27.9587	27.8715	27.8344	27.9487	27.8992	27.6904	27.8876	27.9374	28.0104	27.9631	27.9277	27.9166	28.0253	27.9959	27.9761	27.9848
P01024	C3	Complement C3	26.0316	25.9834	25.9702	25.9427	25.9434	25.9813	26.022	25.9298	25.8299	25.9288	25.9175	25.9477	26.3435	26.2546	26.2357	26.1723	26.2125	26.1932	26.1802	26.2061	26.2136	26.1712	26.2023	26.2121	26.3597	26.2896	26.2883	26.2285	26.3157	26.3512	26.3785	26.3975	26.3367	26.3365	26.3937	26.392	26.1482	26.0885	26.1439	26.1562	26.1349	26.2193	26.1971	26.1934	26.1723	26.1742	26.1733
P01031	C5	Complement C5	26.0475	26.0395	25.991	25.995	25.9644	26.0334	26.0374	26.0154	25.9099	25.9508	25.9533	25.9706	26.1864	26.2011	26.2876	26.0459	26.1212	26.231	26.2705	26.1307	26.0704	26.0218	26.1258	26.1046	26.2238	26.0522	26.2762	26.1248	26.1706	26.3112	26.1823	26.0812	26.0763	26.0847	26.1858	26.2154	26.2782	26.2942	26.1621	26.2059	26.2429	26.3033	26.4134	26.2213	26.1626	26.2238	26.208
P01033	TIMP1	Metalloproteinase inhibitor 1	25.0619	25.1524	24.811	25.1623	25.2611	25.3087	24.2501	24.7238	25.3159	25.1137	24.3284	25.2568	24.9427	24.4811	24.4108	24.4412	24.4702	24.8907	24.351	24.1108	24.4519	24.9636	24.5416	24.5558	25.0354	24.5043	24.608	24.8645	24.7648	25.1635	25.1085	24.5314	25.1712	24.3064	25.0514	25.3231	25.1918	24.8076	25.3441	25.4372	24.8695	24.9685	24.7322	24.5067	25.5302	25.367	24.8176
P01034	CST3	Cystatin-C	27.8397	28.0784	28.0121	28.0401	27.8305	27.8491	27.7558	27.9138	27.8052	27.8237	27.8372	27.891	27.9142	27.9246	27.8717	27.9234	27.9573	27.7694	27.7992	27.9081	27.8048	27.8516	27.7579	27.7367	27.7261	27.7228	27.7053	27.6306	27.7288	27.626	27.5429	27.5635	27.5735	27.5822	27.7372	27.6523	27.2825	27.4714	27.5774	27.6439	27.5294	27.4529	27.5596	27.5118	27.4334	27.5924	27.6795
P01042	KNG1	Kininogen-1	24.4675	24.3871	24.5165	24.449	24.4424	24.5598	24.5233	24.5651	24.5129	24.5524	24.4867	24.5603	24.7947	24.8539	24.787	24.9657	24.9396	24.8593	24.7608	24.8484	24.8874	24.8985	24.8351	24.845	24.6614	24.5327	24.6005	24.6758	24.7376	24.5802	24.7249	24.6626	24.6302	24.6544	24.6344	24.6066	24.7813	24.6808	24.8107	24.7733	24.6717	24.8212	24.6137	24.7499	24.8547	24.8262	24.7492
P01344	IGF2	Insulin-like growth factor II	18.4142	18.3673	18.5199	18.3606	18.1069	18.3681	18.3345	18.3499	18.4014	18.2403	18.2803	18.4672	18.634	18.7662	18.6131	18.7253	18.624	18.727	18.324	18.5032	18.6306	18.6661	18.5021	18.6334	18.2367	18.1396	18.0566	18.0235	18.2557	18.1495	18.201	18.1694	18.2036	18.2597	18.1272	18.1401	18.9426	18.5737	18.5561	18.6608	18.7041	18.6988	18.6476	18.3367	18.7232	18.6808	18.7075
P01591	JCHAIN	Immunoglobulin J chain	24.3215	24.3174	24.3842	24.3516	24.3562	24.3697	24.1978	24.2362	24.3177	24.3429	24.1477	24.1183	24.4578	24.618	24.6677	24.6504	24.7001	24.6074	24.5669	24.6523	24.5073	24.5978	24.6574	24.6496	23.4132	23.5822	23.3721	23.6091	23.4494	23.5081	23.6063	23.5861	23.4173	23.4108	23.2943	23.383	23.6803	23.9257	23.8337	23.9539	23.9788	23.9627	23.8952	24.0859	24.0547	24.0841	23.9968
P01593	IGKV1-33	Immunoglobulin kappa variable 1D-33	20.9397	21.0601	20.9724	20.8428	20.746	20.8586	20.6161	20.6198	20.3765	20.5682	20.7748	20.6854	20.6382	20.4551	20.5932	20.1619	20.3381	20.0826	20.1229	20.3882	20.2302	20.0289	20.5537	20.1031	20.4971	20.3587	20.3803	20.3249	20.4162	20.3518	20.181	20.1851	20.3337	20.4435	20.5276	20.4075	20.7462	21.0306	20.7891	20.9233	20.8393	20.8621	20.7187	20.8266	21.0141	20.9611	20.9699
P01597	IGKV1-39	Immunoglobulin kappa variable 1-39	23.0789	23.1488	23.1541	23.2144	23.2014	23.288	23.146	23.1844	22.8949	23.1426	23.0806	23.1098	22.7844	22.8064	22.7546	22.7451	22.9166	22.8225	22.7062	22.7058	22.7819	22.7731	22.7455	22.8083	22.9029	22.8131	22.9276	22.9071	23.0158	22.7462	22.9403	22.9062	22.7679	22.7183	22.6577	22.8856	22.6481	22.8076	23.0018	23.0541	22.9954	23.0852	22.8925	22.8307	22.6299	23.0482	22.8384
P01601	IGKV1D-16	Immunoglobulin kappa variable 1D-16	21.3538	21.3007	21.0103	21.1404	21.0892	21.2522	21.1497	21.3196	21.1671	21.3002	21.4966	21.2954	20.7172	20.5937	20.5737	20.5788	20.6887	20.6753	20.6555	20.4092	20.4472	20.517	20.5548	20.5241	20.756	20.5181	20.7323	20.5852	20.6257	20.7308	20.7235	20.5879	20.4587	20.6292	20.6335	20.6259	20.4188	20.7463	20.7488	20.6575	20.6351	20.5262	20.6323	20.6657	20.8535	20.8298	20.781
P01602	IGKV1-5	Immunoglobulin kappa variable 1-5	23.2984	23.5762	23.3751	23.4099	23.3636	23.3927	23.222	23.1792	22.8859	23.2326	23.3389	23.1828	22.7826	23.0743	22.9246	22.8218	23.0656	23.0892	23.0016	22.7185	22.8471	22.7241	22.9148	22.8256	22.773	22.452	22.6614	22.482	22.8209	22.7138	22.5677	22.4505	22.4778	22.5582	22.6354	22.6328	22.5688	22.9902	22.8834	22.9433	23.1676	23.0728	23.0255	23.2199	23.2141	22.9374	23.1393
P01619	IGKV3-20	Immunoglobulin kappa variable 3-20	25.9219	26.2055	26.015	25.9247	25.821	25.7306	25.746	25.6954	25.323	25.6931	25.6413	25.4415	25.6972	25.8354	25.8957	25.386	25.6572	25.6998	25.668	25.5113	25.4735	25.3363	25.5064	25.4905	25.4976	25.4872	25.5111	25.2137	25.4068	25.6335	25.0793	24.9181	24.9962	24.9992	25.3281	25.26	25.5785	25.5544	25.6059	25.831	25.8554	25.7194	25.9288	26.0254	25.7736	25.7417	26.2307
P01700	IGLV1-47	Immunoglobulin lambda variable 1-47	20.964	21.0011	21.0555	21.2578	21.336	21.3345	21.299	21.3056	21.2517	21.3148	21.0684	21.0351	20.4208	20.8207	20.4736	20.8691	20.6383	20.8188	20.8683	20.5813	20.7221	20.6994	20.7322	20.6903	21.419	21.4119	21.7475	21.7368	21.4318	21.4003	21.2056	21.2737	21.3395	21.3077	21.5045	21.4	20.7706	21.3163	21.1864	21.1713	20.627	21.2095	21.3715	20.9213	21.5991	21.161	21.1532
P01701	IGLV1-51	Immunoglobulin lambda variable 1-51	22.5021	22.2734	22.4646	21.7775	22.4935	22.5059	22.2884	22.5619	22.0654	22.3546	22.2248	22.364	23.2024	23.3478	23.3592	23.3039	23.1906	23.337	23.213	23.2065	23.1963	23.2002	23.12	23.2162	22.9349	22.4786	22.8906	22.8787	22.73	22.8037	22.3762	22.6868	22.8054	22.1588	22.6969	22.7619	22.1199	22.2459	22.3645	22.4175	22.4499	22.426	22.5236	22.5905	22.5074	22.5479	22.485
P01703	IGLV1-40	Immunoglobulin lambda variable 1-40	20.3611	20.5251	20.8289	20.7855	20.956	20.6772	20.7328	20.6256	20.6705	20.656	20.2902	20.5326	20.5167	20.4063	20.4471	20.9621	20.9906	20.7954	20.7288	20.8566	20.9355	20.7631	20.7621	20.6339	19.935	19.8903	20.0996	20.4713	20.1202	19.9573	20.2791	20.2391	20.2291	20.3764	20.2401	20.2879	19.9088	20.356	20.368	20.5496	20.3269	20.4509	20.2728	19.6583	20.5396	20.8278	20.3479
P01706	IGLV2-11	Immunoglobulin lambda variable 2-11	20.3477	20.346	20.4644	20.3531	20.469	20.4129	20.336	20.3717	20.5639	20.5487	20.5178	20.8579	18.3472	18.5306	18.7069	18.3295	18.7259	18.5522	18.5564	18.4195	18.7407	18.7348	18.3714	18.7586	19.2289	19.2128	19.2208	19.4742	19.4695	19.3274	19.1059	19.3297	18.653	19.3318	19.3248	19.2503	18.2889	17.9341	18.2274	19.0068	18.8589	18.3134	18.5096	18.6576	18.3443	18.9832	18.3223
P01714	IGLV3-19	Immunoglobulin lambda variable 3-19	19.2831	19.2765	19.5273	19.366	19.5312	19.4891	19.3864	19.2697	19.3046	19.1766	19.3943	19.3082	21.1443	21.6002	21.6262	21.614	21.637	21.6605	21.5692	21.4833	21.477	21.4444	21.4569	21.4653	20.864	20.4666	20.7822	20.8325	20.8633	20.8239	20.7955	20.573	20.6807	20.7469	20.7671	20.7578	20.4096	20.702	20.6832	20.7933	20.718	20.6771	20.7387	20.8258	20.7524	20.7451	20.8175
P01715	IGLV3-1	Immunoglobulin lambda variable 3-1	19.145	19.2779	19.6926	19.2129	19.1931	19.3034	19.1859	19.4636	19.5074	19.1799	19.4863	19.0178	18.428	18.7615	18.7065	18.7257	18.7114	18.6182	18.8512	18.5578	18.5965	18.52	18.4104	18.4312	18.438	18.7062	18.4377	18.4284	18.2417	18.6393	18.2523	18.2684	17.8225	18.2533	17.8704	18.2123	18.1519	18.2097	18.3647	18.55	17.9986	18.4493	18.5731	18.6804	18.7391	18.6827	18.7636
P01717	IGLV3-25	Immunoglobulin lambda variable 3-25	24.0023	23.9208	24.0035	23.9305	23.9275	23.7677	23.5726	23.5421	23.5766	23.6271	23.682	23.7158	23.1003	23.4213	23.4787	23.3181	23.3618	23.4604	23.3473	23.0259	23.0042	23.0172	22.9585	22.9934	23.4373	23.1765	23.6079	23.2395	23.2444	23.5052	23.3216	23.208	23.3508	23.1855	23.2511	23.3039	23.1416	23.3637	23.2578	23.3931	23.4951	23.522	23.3923	23.531	23.492	23.4143	23.5621
P01742	IGHV1-69	Immunoglobulin heavy variable 1-69	23.6936	23.615	23.6446	23.4447	23.2192	23.1909	23.2845	23.1812	23.123	23.1781	23.143	23.1608	23.0958	23.3901	23.3469	23.0869	23.0762	23.2534	23.1864	22.9558	23.0684	23.1743	22.9741	23.0326	22.8445	22.8327	22.7723	22.7299	22.8432	22.8798	22.7776	22.7119	22.7609	22.3004	22.6782	22.6996	22.9831	23.2994	22.9019	23.1388	23.3605	23.064	23.3684	23.4857	23.2417	23.2648	23.484
P01766	IGHV3-13	Immunoglobulin heavy variable 3-13	21.5713	21.3024	21.5821	21.6242	21.7741	21.7226	21.7	21.6939	21.8119	21.7578	21.7645	21.8859	21.2	21.2357	21.0987	21.2398	21.1987	20.9491	21.2167	21.255	21.375	21.391	21.4575	21.4362	21.6416	21.5559	21.6398	21.719	21.6596	21.2021	21.7356	21.4838	21.6199	21.5808	21.6403	21.6508	20.9926	21.039	21.5783	20.949	21.2303	21.2717	21.6402	21.796	21.3595	21.5838	21.8783
P01768	IGHV3-30	Immunoglobulin heavy variable 3-30	22.7454	22.7046	22.6807	22.4941	22.5318	22.5533	22.4702	22.4475	22.326	22.5035	22.2678	22.342	22.4921	22.528	22.5732	22.2682	22.4103	22.4332	22.3555	22.2568	22.2333	22.1695	22.227	22.1212	22.5041	22.2969	22.2354	22.1245	22.2881	22.3976	22.1831	22.1625	21.9638	21.9134	22.1541	22.1053	22.363	22.6584	22.3919	22.5697	22.7957	22.5942	22.8494	22.8854	22.6872	22.6769	22.897
P01780	IGHV3-7	Immunoglobulin heavy variable 3-7	28.7273	28.7166	28.7513	28.7053	28.5369	28.6009	28.59	28.5012	28.3981	28.5591	28.55	28.57	28.3162	28.7081	28.7302	28.6002	28.7334	28.6681	28.4986	28.5229	28.4652	28.3655	28.4674	28.4598	28.2943	28.0519	28.2284	28.2371	28.2422	28.2755	28.1212	27.975	27.9582	27.9386	28.126	28.0355	27.8748	28.202	28.0187	28.1157	28.3139	28.1382	28.3551	28.3591	28.259	28.2052	28.4351
P01782	IGHV3-43D	Immunoglobulin heavy variable 3-9	20.6695	20.7113	20.7673	20.7148	20.5204	20.5489	20.6381	20.5438	20.4979	20.7844	20.5851	20.6739	20.5096	20.2755	20.3884	20.3323	20.4525	20.2811	20.4092	20.2482	20.4296	20.3228	20.1039	20.3713	20.327	20.1974	20.1847	20.1445	20.2385	20.1756	20.1395	20.2178	20.1205	19.988	20.1535	20.1406	20.0856	20.3673	20.2063	20.3625	20.4951	20.3319	20.537	20.6837	20.5265	20.3964	20.5274
P01817	IGHV2-5	Immunoglobulin heavy variable 2-5	20.8992	21.6573	20.9329	21.4895	21.1039	21.7324	20.7561	20.9215	20.6557	20.9206	20.5904	21.3557	21.0437	19.9703	20.469	18.8843	19.637	20.4273	20.6163	19.7965	20.0319	20.2891	20.4085	19.0272	20.0542	20.275	20.4196	20.2555	20.2347	20.3333	19.7504	21.02	20.2635	19.5163	19.7027	19.4555	18.6197	19.6684	19.1601	19.7769	20.0768	19.1863	19.6557	19.6711	20.6176	19.6312	20.5228
P01834	IGKC	Immunoglobulin kappa constant	28.5556	28.6381	28.6792	28.7397	28.7908	28.6597	28.6101	28.6354	28.7011	28.6491	28.6313	28.6346	27.8365	27.8992	27.8609	27.9364	27.9504	27.9311	27.9	27.8846	27.9118	27.9256	27.9101	27.9225	27.9547	27.9029	27.8874	27.7686	27.936	27.8245	27.8547	27.8789	27.9733	27.9473	27.9425	27.9109	27.234	27.5398	27.7732	27.7188	27.6533	27.4798	27.5843	27.6877	27.8502	27.8202	27.7928
P01857	IGHG1	Immunoglobulin heavy constant gamma 1	28.8249	28.802	28.7944	28.815	28.7767	28.7853	28.6694	28.6892	28.7338	28.7647	28.7111	28.7131	28.7782	28.9113	28.9419	28.9388	28.9233	28.9201	28.8803	28.8715	28.9084	28.877	28.8989	28.8825	28.5668	28.5606	28.589	28.5462	28.6117	28.5807	28.5229	28.4573	28.4775	28.4836	28.5177	28.5181	27.7668	28.0036	28.2609	28.2027	28.0779	28.0503	28.1221	28.2333	28.3479	28.3211	28.2264
P01859	IGHG2	Immunoglobulin heavy constant gamma 2	29.9275	29.9384	29.9499	29.9854	29.9572	29.9506	29.9193	29.9161	29.9281	29.9587	29.9791	29.9479	28.1862	28.4023	28.338	28.3126	28.3055	28.3249	28.2082	28.2276	28.2395	28.2023	28.2416	28.2107	28.9653	28.9859	29.0169	29.019	28.998	29.0018	28.9797	28.979	28.9801	28.9286	28.9638	28.8985	28.1484	28.4205	28.6878	28.6058	28.588	28.4406	28.5172	28.7167	28.785	28.7985	28.7518
P01860	IGHG3	Immunoglobulin heavy constant gamma 3	25.6323	25.4816	25.5715	25.6028	25.6019	25.6278	25.5355	25.5596	25.5502	25.5222	25.5342	25.5014	24.5608	24.484	24.472	24.461	24.4602	24.5152	24.6048	24.3051	24.2831	24.2928	24.2856	24.2797	25.1512	24.7041	25.1883	25.0873	25.3799	25.1158	25.1587	25.1547	25.182	25.2046	25.1791	25.3038	23.1729	23.548	23.6209	23.5772	23.5976	23.6074	23.7464	23.6577	23.7117	23.6054	23.7268
P01861	IGHG4	Immunoglobulin heavy constant gamma 4	26.2974	26.1857	26.3171	26.3266	26.2303	26.3626	26.2771	26.3388	26.3626	26.3988	26.3599	26.1992	23.9857	23.7887	23.4457	23.877	23.6475	23.567	23.8918	23.8218	23.8818	23.942	23.8769	23.8009	25.4305	24.9693	25.4394	25.6552	25.7979	25.3817	25.6011	25.5532	25.4683	25.7062	25.3644	25.4561	25.5134	25.9815	26.0984	26.1751	25.872	26.0053	25.7976	26.2003	26.3156	26.4711	26.2428
P01871	IGHM	Immunoglobulin heavy constant mu	27.9853	28.0048	28.0993	28.0405	28.0034	28.0332	27.9865	27.9856	27.9504	28.007	27.9693	28.0144	28.1613	28.8081	28.888	28.8164	28.7432	28.8074	28.7092	28.4607	28.4439	28.4873	28.4424	28.413	27.6194	27.4753	27.4738	27.4963	27.5431	27.3841	27.4628	27.504	27.4293	27.4527	27.4918	27.4275	27.3462	27.7466	27.8168	27.8121	27.7912	27.8048	27.7854	27.9562	27.9653	27.9728	27.9566
P01876	IGHA1	Immunoglobulin heavy constant alpha 1	27.8258	27.7628	27.851	27.7877	27.8107	27.8088	27.8147	27.8497	27.8258	27.7844	27.8247	27.8477	27.8398	27.8774	27.8077	27.9134	27.9455	27.8891	27.8229	28.0405	28.1397	28.1214	28.1303	28.1529	27.8011	27.7051	27.7013	27.7684	27.7847	27.6731	27.7188	27.8078	27.7119	27.6458	27.6862	27.6807	27.4439	27.5753	27.8418	27.7434	27.7562	27.7872	27.6852	27.8334	27.7791	27.7293	27.7597
P01877	IGHA2	Immunoglobulin heavy constant alpha 2	26.2287	26.2623	26.3195	26.2765	26.3444	26.2832	26.4208	26.3339	26.4738	26.2326	26.2413	26.542	26.2395	26.1476	25.9624	26.1514	26.3322	26.3348	26.0849	26.3897	26.333	26.4373	26.3227	26.5357	26.3012	26.3199	26.2493	26.1952	26.1586	26.0327	26.2582	26.4021	26.1509	26.0088	25.9836	26.0826	25.7391	25.4183	26.539	26.2759	26.2515	26.3753	26.1712	26.4618	26.3227	26.1328	26.2611
P01880	IGHD	Immunoglobulin heavy constant delta	23.1292	23.1031	22.9811	23.1312	23.1127	23.1004	23.0107	23.0307	23.0709	22.913	23.0303	22.8966	21.6279	21.5144	21.2069	21.2357	21.3525	21.348	21.1503	21.6823	21.714	21.7673	21.7406	21.7461	21.3729	21.2303	21.3078	21.2352	21.3867	21.1835	21.2691	21.0019	21.0976	21.0862	21.2749	21.1123	22.2633	22.1529	22.1828	22.0632	22.0539	22.099	22.0336	21.977	22.1627	22.139	22.0657
P01889	HLA-B	HLA class I histocompatibility antigen, B alpha chain	19.0995	19.0941	18.8417	18.5676	19.0761	19.0835	18.9543	18.7072	18.7346	19.1233	18.7291	18.8914	18.3482	18.2143	18.8057	18.2979	18.1611	18.7366	19.3403	18.3514	18.4194	18.2167	18.3664	18.3688	18.8773	19.5456	19.176	19.2431	18.9179	19.306	18.6628	18.9665	18.6547	18.8071	18.2129	18.9489	18.8456	19.146	19.0112	18.8377	19.1218	18.8206	19.5331	18.8786	19.2648	18.8785	19.089
P02144	MB	Myoglobin	28.6383	28.7073	28.6504	28.7504	28.7273	28.711	28.5684	28.681	28.7943	28.6559	28.67	28.5556	28.4323	28.6063	28.5007	28.2426	28.6284	28.5659	28.3261	28.616	28.6299	28.6975	28.6504	28.3009	28.2139	27.8306	28.4705	28.1902	28.3072	28.0432	27.9553	28.2345	28.479	28.3218	28.1831	28.4725	28.1	28.1956	28.3608	28.3511	28.2228	28.3831	28.2072	28.3328	27.9441	28.2356	28.1852
P02452	COL1A1	Collagen alpha-1(I) chain	20.8213	20.7513	20.961	20.9647	20.9331	20.8772	20.9366	20.7335	20.7251	20.8118	20.8494	20.7582	21.0854	20.9832	20.7296	20.9895	21.1269	20.7538	20.6074	20.8761	20.844	20.8956	20.8866	20.7808	20.9603	21.0695	20.9524	21.054	21.1302	21.0704	21.1762	21.1454	21.0095	21.0663	21.0407	21.0259	21.2272	21.0897	20.9648	21.1175	21.0052	20.8603	21.0556	20.9329	21.0534	20.9829	20.9842
P02533	KRT14	Keratin, type I cytoskeletal 14	26.3099	26.1179	26.2623	26.4312	26.2857	26.1184	26.1235	26.0852	26.2468	26.1529	26.2091	26.2415	26.3582	26.1663	26.1568	26.4441	26.3534	26.239	26.1437	26.3315	26.2843	25.8014	26.3012	26.3547	26.0944	26.2635	26.2156	26.282	26.3103	26.2196	26.2788	26.2123	26.2524	26.3096	26.1366	26.2519	25.8853	25.9377	25.8889	26.2106	25.9927	26.1327	25.9811	25.9201	26.2756	26.1203	25.7854
P02538	KRT6A	Keratin, type II cytoskeletal 6A	21.782	21.8301	21.3108	22.0785	22.0435	21.5469	21.5394	21.6448	22.2153	22.0447	21.8218	21.8703	23.8399	21.999	21.9163	21.5171	22.0102	21.9864	21.9177	21.9508	21.9986	21.8837	22.0381	22.0965	22.0572	21.8311	22.2288	21.8478	21.9898	21.8856	21.7389	21.8105	22.0156	22.0358	21.8987	22.0212	22.0859	21.6684	22.2282	22.8329	22.0526	21.929	21.8762	21.8677	22.101	21.9831	21.7908
P02647	APOA1	Apolipoprotein A-I	28.5085	28.5008	28.5725	28.5452	28.5561	28.6165	28.6053	28.6473	28.5802	28.5918	28.6405	28.652	28.3423	28.5606	28.4561	28.5748	28.6147	28.5772	28.4225	28.6123	28.6343	28.6436	28.6517	28.6373	28.4009	28.4507	28.4846	28.4752	28.5932	28.5034	28.4849	28.5359	28.4832	28.45	28.4617	28.4932	28.5921	28.533	28.7788	28.7068	28.6314	28.669	28.467	28.6129	28.6362	28.6848	28.6079
P02649	APOE	Apolipoprotein E	24.6407	24.5373	24.3406	24.2544	24.1822	24.2458	24.4207	24.2692	24.0819	24.311	24.3174	24.3153	24.9534	24.5263	24.6404	24.323	24.4628	24.7266	24.6133	24.6117	24.4969	24.4719	24.5991	24.5991	25.1225	24.5398	24.5692	24.3925	24.6504	24.8399	24.3689	24.4064	24.4525	24.4357	24.7625	24.6524	25.5574	25.2075	24.7004	25.1019	25.417	24.911	25.4305	25.5275	24.9946	25.0049	25.4314
P02652	APOA2	Apolipoprotein A-II	27.5669	27.3037	27.6682	27.658	27.6662	27.5259	27.4614	27.5772	27.4892	27.5157	27.4438	27.4698	27.2519	27.4193	27.3856	27.6079	27.502	27.5515	27.1358	27.1553	27.2906	27.2468	27.4259	27.389	27.6613	27.7009	27.6847	27.6652	27.6504	27.6162	27.5293	27.6771	27.6665	27.4438	27.4784	27.6097	27.2091	26.7861	27.2324	27.241	27.0186	27.2535	27.1571	27.2778	27.2964	27.1477	27.1556
P02654	APOC1	Apolipoprotein C-I	23.1356	23.2246	22.7674	22.6126	22.8519	23.2536	23.2896	23.3616	22.6257	23.0337	23.2236	23.3421	23.0384	23.0739	22.894	22.9192	23.3313	23.0999	22.9937	23.1765	22.9972	22.9638	23.1569	23.1463	22.6925	22.2563	21.9274	22.2593	22.5304	22.4638	22.5016	22.507	22.1354	22.1861	22.4392	22.449	22.8716	23.1015	22.6734	22.6667	23.2543	23.2763	23.0128	23.2657	22.5325	22.473	23.1865
P02655	APOC2	Apolipoprotein C-II	23.3436	23.1151	22.8049	22.1707	22.5297	23.0456	23.297	23.172	23.1909	22.9819	22.845	23.4169	22.9246	23.0212	22.8413	22.8253	22.9699	22.983	22.8386	23.103	23.0018	22.7837	22.6447	22.7861	23.4246	22.4408	22.4451	22.441	22.7578	22.8917	22.9099	22.6858	22.7551	22.5813	22.5252	22.6322	23.3055	23.0254	22.976	22.8009	22.9153	23.0085	22.7109	23.1762	23.1886	22.8825	23.0168
P02656	APOC3	Apolipoprotein C-III	26.0033	25.7272	25.5143	25.1853	25.7166	26.0168	26.0776	26.123	26.1174	25.9577	25.9405	26.1767	25.6896	26.1787	26.0563	26.1244	26.1881	26.1134	25.9017	26.2375	26.3586	26.3251	26.192	25.9938	26.2824	25.969	26.1587	26.2028	26.4198	26.0644	25.9917	25.816	26.0072	25.8815	25.9372	25.8618	26.1275	25.7984	26.0791	25.8421	25.9457	25.8675	25.5332	26.128	26.1101	25.7891	26.1071
P02671	FGA	Fibrinogen alpha chain	26.4064	26.7148	26.1145	26.4014	26.3244	26.369	26.1603	26.1663	26.0501	26.3088	25.9711	26.0976	25.9639	26.1113	26.7195	25.7337	25.8385	26.4708	27.1092	25.9563	25.9447	25.7075	25.8383	25.8728	26.2657	26.2608	27.4035	26.8394	26.455	26.9124	26.158	26.1743	26.1215	26.0781	26.2807	26.4234	26.159	26.2972	25.8321	26.0393	26.0472	26.1443	26.8948	26.0556	25.8917	26.0415	25.9013
P02675	FGB	Fibrinogen beta chain	27.6188	27.9447	27.5092	27.742	27.6658	27.7879	27.61	27.5726	27.5703	27.6818	27.4511	27.5783	27.3283	27.4552	27.9334	27.2368	27.3512	27.805	28.3317	27.3691	27.4452	27.2147	27.351	27.3822	27.6937	27.655	28.5926	28.1662	27.8103	28.1251	27.6057	27.6258	27.5996	27.5183	27.6585	27.794	27.3655	27.4938	27.1699	27.2202	27.2698	27.4319	28.0108	27.3006	27.1928	27.3127	27.1989
P02679	FGG	Fibrinogen gamma chain	26.5626	26.892	26.4628	26.7411	26.692	26.7464	26.5108	26.4924	26.4675	26.6367	26.2598	26.4538	26.2408	26.447	26.9861	26.1155	26.1839	26.7593	27.3356	26.2528	26.3002	26.0412	26.1919	26.2234	26.5492	26.5621	27.615	27.1182	26.7317	27.1147	26.504	26.5174	26.4933	26.4269	26.5766	26.6884	26.4295	26.5009	26.2152	26.301	26.3144	26.4064	27.0867	26.3374	26.245	26.3724	26.1918
P02743	APCS	Serum amyloid P-component	23.2795	23.1744	22.9984	22.7708	22.5219	22.7369	22.8996	22.6482	22.6585	22.587	22.5287	22.5525	23.6657	23.4473	23.4632	22.9881	23.0697	23.1749	23.2681	22.9172	22.8748	22.676	22.7781	22.702	23.8253	23.8514	23.6434	23.2102	23.5048	23.5529	23.2948	23.2101	23.2934	23.1781	23.4297	23.2376	23.4241	23.5675	22.496	22.8695	23.082	22.959	23.1258	23.0585	22.8129	22.9053	23.0273
P02745	C1QA	Complement C1q subcomponent subunit A	23.0003	23.0729	23.1531	22.967	23.0468	23.0041	22.9366	22.8848	22.9721	22.8891	22.7586	22.8687	22.7652	22.8386	23.0179	22.8658	22.7428	22.9751	23.211	22.8776	22.7636	22.7137	22.8191	22.8898	22.7642	22.5228	23.0657	22.7036	22.6759	22.8932	22.5768	22.6645	22.5477	22.6414	22.6439	22.6304	22.4242	22.7514	22.6892	22.6238	22.6282	22.5494	22.9142	22.6657	22.6444	22.7209	22.6925
P02746	C1QB	Complement C1q subcomponent subunit B	22.7503	22.8311	22.6905	22.6459	22.6404	22.6236	22.6348	22.5471	22.3169	22.564	22.5871	22.5023	22.6215	22.6036	22.7278	22.289	22.4807	22.5599	22.7984	22.3815	22.3983	22.3267	22.401	22.3716	22.5833	22.4536	22.9317	22.4418	22.5116	22.7587	22.456	22.5807	22.3742	22.4003	22.5457	22.4829	22.292	22.5569	22.1951	22.3513	22.2799	22.3152	22.7254	22.4304	22.2234	22.2684	22.42
P02747	C1QC	Complement C1q subcomponent subunit C	23.6028	23.7574	23.6371	23.4697	23.7757	23.5411	23.425	23.5017	23.453	23.479	23.3704	23.4158	23.433	23.4708	23.6263	23.2155	23.4128	23.6216	23.8417	23.4357	23.4393	23.4057	23.4172	23.4103	23.262	23.385	23.6077	23.1771	23.1293	23.6412	23.2328	23.1846	23.1529	23.0904	23.2247	23.1439	22.9965	23.1478	23.0622	23.0846	23.1148	23.0518	23.5019	23.1755	23.1425	22.9407	23.1317
P02748	C9	Complement component C9	26.4799	26.455	26.4919	26.5185	26.5318	26.6623	26.6302	26.439	26.345	26.3896	26.4481	26.5617	27.0501	26.55	26.5375	26.6096	26.6137	26.6685	26.7958	26.8644	26.8486	26.8161	26.8531	26.8707	26.5661	26.447	26.3488	26.4711	26.5047	26.547	26.6226	26.5692	26.486	26.4508	26.5359	26.5952	26.9115	26.7606	26.8497	26.8771	26.8565	27.1311	26.8695	26.7653	26.8395	26.8464	26.8301
P02749	APOH	Beta-2-glycoprotein 1	24.8812	24.8349	24.9293	25.0044	24.9206	25.1375	24.9807	25.1029	24.9665	24.9865	24.9559	25.0698	25.0089	25.0067	24.9804	25.1505	25.222	25.2676	25.0148	25.238	25.264	25.193	25.2492	25.2635	24.9202	24.8971	24.8716	24.9512	25.0224	25.0122	25.1104	25.0717	25.0981	24.9187	25.0302	25.0786	25.1889	25.1749	25.4437	25.3606	25.2641	25.2767	25.2117	25.3603	25.4431	25.3728	25.3636
P02750	LRG1	Leucine-rich alpha-2-glycoprotein	22.0126	22.0958	22.1487	22.1334	22.0289	22.3914	21.9705	22.0252	22.0259	22.0067	21.9629	22.3148	23.2008	22.8259	22.7284	22.8256	22.8906	22.9216	23.049	23.0665	23.0638	22.9931	22.9972	22.9625	21.9864	22.0137	22.0199	22.0156	22.0268	22.1847	22.1879	21.9136	22.0084	22.0342	21.9792	21.7976	22.433	22.176	22.2704	22.3582	22.3436	22.6599	22.3767	22.1237	22.3022	22.3084	22.3525
P02751	FN1	Fibronectin	24.585	25.8902	23.6608	25.0589	24.699	24.6041	24.0901	24.4287	24.6759	25.226	23.3279	23.1938	22.6845	24.0372	24.5017	22.6141	22.552	24.471	25.699	23.3831	23.857	22.0394	23.2564	22.9445	24.2817	24.6016	26.4283	26.2296	25.1065	25.0274	23.92	23.8575	24.2613	24.4032	24.7334	25.2183	24.9522	24.8439	23.4887	23.8879	24.1503	24.3021	25.395	24.0181	23.7451	24.5531	23.4279
P02753	RBP4	Retinol-binding protein 4	22.9757	22.6128	22.7841	22.7493	22.7353	22.9713	23.0965	23.2194	23.0727	23.1374	23.0579	23.1166	23.1986	23.2232	23.0829	23.1929	23.1436	23.1379	23.1014	23.2418	23.2039	23.2191	23.1871	23.2248	23.1688	23.0169	23.1035	23.1513	23.1258	23.1636	23.2375	23.298	23.2052	23.1862	23.2093	23.1881	23.7204	23.4225	23.6543	23.5143	23.4306	23.5293	23.4155	23.4168	23.5398	23.5049	23.418
P02760	AMBP	Protein AMBP	24.8622	24.6814	24.7846	24.8186	24.9168	25.0116	25.0514	25.0627	25.0923	25.0178	24.9941	25.1146	25.0507	25.2875	25.0734	25.3622	25.3317	25.2937	25.0952	25.3293	25.3042	25.3824	25.3347	25.3989	25.0553	24.8783	24.9897	25.0204	25.0702	25.1106	25.2749	25.4132	25.2275	25.2603	25.2371	25.2685	25.1189	25.122	25.3773	25.3251	25.2676	25.3618	25.3269	25.4471	25.3701	25.3517	25.4481
P02763	ORM1	Alpha-1-acid glycoprotein 1	25.5	25.4782	25.5879	25.6256	25.5643	25.668	25.6456	25.4768	25.4896	25.4957	25.5438	25.6038	26.5627	26.2661	26.1897	26.4317	26.3763	26.2591	26.3502	26.302	26.4367	26.3663	26.3705	26.3359	26.1086	26.2765	26.281	26.2642	26.3173	26.1103	26.2547	26.0992	26.1874	26.1209	26.0964	26.1525	25.6712	25.9545	26.227	26.2192	26.0479	26.3237	26.145	25.9017	26.0155	26.0603	26.0097
P02765	AHSG	Alpha-2-HS-glycoprotein	26.5504	26.4646	26.5334	26.5798	26.5327	26.5442	26.6252	26.5525	26.5691	26.5616	26.5582	26.5533	26.585	26.5597	26.4138	26.5846	26.5859	26.499	26.4236	26.6163	26.621	26.6485	26.6555	26.6142	26.6632	26.5603	26.6335	26.6674	26.7188	26.5397	26.7645	26.7297	26.7517	26.7801	26.7883	26.7961	26.8631	26.7543	26.8697	26.8566	26.7827	26.813	26.6273	26.7477	26.8125	26.8323	26.7861
P02766	TTR	Transthyretin	21.8439	22.4914	21.3902	21.0264	22.0347	22.3498	22.6641	22.4253	21.2053	21.9961	23.2027	22.3981	22.7812	23.0487	23.0226	22.4869	23.289	23.7228	23.6392	23.1169	22.1837	22.2207	22.9858	23.0732	22.7721	22.7487	23.2241	22.3383	23.1402	23.6982	23.1019	23.1479	22.2715	22.5628	23.3225	23.2446	23.0154	23.2922	22.3584	22.5136	23.498	22.9149	23.6044	23.2014	21.8921	21.8287	23.2334
P02768	ALB	Albumin	32.2666	32.1998	32.2896	32.2989	32.2452	32.2882	32.2634	32.3154	32.3244	32.3112	32.3154	32.3262	32.1424	32.2376	32.2118	32.2749	32.312	32.2305	32.1839	32.2285	32.3138	32.2988	32.2749	32.2299	32.0813	32.0659	32.1055	32.1262	32.1568	32.0634	32.1234	32.1345	32.1226	32.042	32.0584	32.0692	31.6272	31.6941	32.0571	32.0029	31.9285	31.8902	31.8547	31.9133	32.0047	31.9843	31.9584
P02774	GC	Vitamin D-binding protein	26.6676	26.5761	26.6458	26.6602	26.638	26.7205	26.65	26.7233	26.6918	26.7054	26.6728	26.7062	27.1679	27.0904	26.9926	27.077	27.0445	27.073	27.0131	27.0518	27.0385	27.0624	27.0658	27.043	26.8506	26.767	26.7159	26.8165	26.9027	26.7473	26.9361	26.9731	26.9593	26.9902	26.969	26.9356	26.8832	26.8445	26.9899	26.9253	26.8651	26.9581	26.8432	26.8487	26.9163	26.946	26.8586
P02786	TFRC	Transferrin receptor protein 1	26.8586	26.9798	27.0365	26.9453	26.8072	27.0616	27.102	26.9771	26.8726	26.8908	26.8572	26.8377	26.9488	27.0775	26.9645	26.8639	26.7413	26.7732	27.2805	27.0555	26.865	27.1682	26.7188	27.1427	26.6935	26.6469	27.1226	26.9942	26.9581	26.8531	26.9066	26.5923	26.835	26.9714	26.8384	26.9728	26.8431	26.611	26.6713	26.737	26.8419	26.7615	26.8669	26.8687	26.6711	26.7849	26.8371
P02787	TF	Serotransferrin	28.1296	28.0384	28.1541	28.1267	28.1783	28.1791	28.2143	28.2527	28.2519	28.23	28.2423	28.2436	27.8922	27.9448	27.8797	28.0525	28.0324	27.9487	27.8506	28.0206	28.0287	28.0616	28.0459	28.0318	27.9913	27.9447	27.9512	28.0679	28.1212	27.9247	28.0822	28.0888	28.0819	28.0511	28.0631	28.0341	27.8551	27.765	28.0133	27.9402	27.8652	27.8909	27.8131	27.944	28.0532	28.0739	28.0091
P02788	LTF	Lactotransferrin	23.5104	23.6065	23.4594	23.5183	23.3681	23.5378	23.4181	23.4914	23.4855	23.4602	23.3982	23.4708	22.8081	23.2507	23.2628	23.1194	23.2596	23.2446	23.2824	23.0064	23.1264	23.1479	22.6319	23.1558	23.1153	23.1517	23.1702	22.9873	23.33	23.3361	22.8086	23.2607	23.0206	23.013	23.2045	23.3114	23.0418	22.8897	23.3912	23.343	23.2748	23.2434	23.3746	23.2811	23.4754	23.2643	23.1946
P02790	HPX	Hemopexin	29.6422	29.5676	29.6558	29.6395	29.6226	29.6293	29.5315	29.5533	29.5266	29.5873	29.5602	29.5268	29.7884	29.815	29.7728	29.8305	29.8576	29.7804	29.7084	29.8011	29.8302	29.8205	29.7782	29.7435	29.5649	29.4873	29.5804	29.5529	29.5959	29.5555	29.5919	29.5601	29.566	29.4925	29.5862	29.5838	29.8006	29.8227	30.0652	30.0087	29.8976	29.8934	29.7945	29.9802	30.0612	30.099	29.9995
P03950	ANG	Angiogenin	27.9858	27.9223	27.6926	27.8616	27.8682	27.8101	28.0183	27.8839	27.7675	27.8033	27.8192	27.9136	27.3509	27.8525	27.6071	27.4915	27.8464	27.7383	27.759	27.5888	27.7367	28.1619	27.9128	27.8632	27.5035	27.752	27.7273	27.5287	27.5268	27.6384	27.6275	27.4142	27.5558	27.5673	27.6574	27.5791	27.6472	27.9176	27.7717	27.7404	27.4097	27.4483	27.7108	27.6396	27.6998	27.6742	27.7179
P03951	F11	Coagulation factor XI	22.9815	23.0466	23.2109	22.9424	23.0717	23.2967	23.193	23.2278	23.0838	23.1008	23.0062	23.1578	23.5474	23.5194	23.4499	23.3911	23.4027	23.441	23.0892	23.4084	23.3181	23.2088	23.2891	23.3168	23.4763	23.2458	23.1178	23.1778	23.3325	23.2703	23.387	23.2207	23.1859	23.2203	23.3585	23.2239	23.4829	23.2994	23.3192	23.3861	23.3415	23.4178	23.3655	23.4391	23.2785	23.5119	23.4586
P03952	KLKB1	Plasma kallikrein	28.5009	28.5256	28.6048	28.5177	28.5042	28.541	28.4997	28.4695	28.4654	28.4855	28.4433	28.4535	28.8961	28.8624	28.7849	28.8999	28.8633	28.8243	28.703	28.7145	28.7223	28.7261	28.7669	28.7545	28.7897	28.6589	28.6278	28.6581	28.7384	28.6121	28.7643	28.7411	28.7494	28.7148	28.7044	28.7135	28.9536	28.888	28.8975	28.9803	28.8932	28.9592	28.8713	29.0013	29.0848	29.0289	28.9501
P04003	C4BPA	C4b-binding protein alpha chain	25.2802	25.2069	25.2322	25.2249	25.2318	25.2688	25.2444	25.1417	25.0855	25.163	25.1248	25.1954	25.6379	25.5595	26.5118	25.4847	25.4453	26.1825	26.5326	25.4333	25.4336	25.4364	25.4162	25.4339	25.8014	25.5302	26.7121	25.596	25.6474	26.5981	25.7247	25.6843	25.6431	25.6293	25.693	25.6715	25.5163	25.8434	25.5863	25.5944	25.4957	25.6286	26.6945	25.6616	25.6399	25.6696	25.5788
P04004	VTN	Vitronectin	27.7527	27.8028	27.7745	27.7416	27.774	27.7839	27.6782	27.7341	27.6712	27.6802	27.6489	27.7694	27.8258	27.808	27.6817	27.6539	27.7387	27.8123	27.8111	27.7713	27.7352	27.6944	27.7142	27.7864	27.7747	27.8442	27.9059	27.7946	27.8379	27.9732	27.7224	27.8225	27.8276	27.7761	27.8255	27.8999	27.9747	27.8831	27.9593	28.0708	28.0842	28.0288	27.9133	28.0238	27.9489	27.9482	28.0012
P04040	CAT	Catalase	26.0104	24.8009	25.7911	25.6532	26.1244	25.7849	25.4776	25.972	24.3866	26.0186	25.6314	24.7849	25.5838	24.7786	25.4849	24.8672	24.8314	25.938	24.8727	26.4152	26.8398	24.3915	24.8088	26.063	25.1759	25.0759	23.9284	26.3164	25.2416	25.035	25.0013	25.4564	25.0921	24.6024	25.126	24.5604	24.746	25.2935	25.4517	24.8183	25.3544	25.4477	25.3752	25.2791	25.6363	25.6731	25.634
P04066	FUCA1	Tissue alpha-L-fucosidase	23.2624	23.1455	23.1581	23.3619	23.2998	23.2561	23.3906	23.3467	23.0284	23.2295	23.209	23.1758	23.1211	23.1484	23.3412	23.2396	23.3246	23.3196	23.3098	23.3999	23.2622	23.3174	23.4239	23.3439	23.3774	23.1616	23.282	23.3881	23.4186	23.3352	23.0145	23.2611	23.247	23.2163	23.2933	23.0418	23.0099	23.0554	23.078	23.2068	23.1592	23.2887	23.1645	22.7254	23.1993	22.8065	22.9186
P04070	PROC	Vitamin K-dependent protein C	26.407	26.4616	26.2388	26.3559	26.3171	26.3143	26.5851	26.4567	26.1234	26.4532	26.1517	26.5116	26.3314	26.466	26.2903	26.3474	26.4264	26.3673	26.3169	26.5056	26.3434	26.3523	26.3798	26.4053	26.557	26.6094	26.6239	26.6251	26.6464	26.5786	26.6566	26.6402	26.6372	26.4926	26.5254	26.4736	26.3846	26.385	26.3456	26.4321	26.3552	26.3749	26.1514	26.3379	26.4454	26.5001	26.4438
P04075	ALDOA	Fructose-bisphosphate aldolase A	24.4398	24.5447	24.6122	24.4244	24.2682	24.7017	24.7945	24.7104	24.4473	24.5658	24.5126	24.5617	24.8562	24.5154	24.553	24.4278	24.6885	24.84	24.5745	24.7348	24.4331	24.841	24.8476	24.5985	24.7485	24.8883	24.7417	24.6737	24.8004	24.8653	24.549	25.0037	24.72	24.4308	24.6347	24.6937	23.9656	24.1157	24.2343	23.9351	23.9849	24.179	24.3048	24.2771	23.4508	24.2037	24.2636
P04114	APOB	Apolipoprotein B-100	27.9344	27.6449	27.6485	27.6366	27.5694	27.5982	27.8926	27.7428	27.7139	27.7301	27.6845	27.6934	27.6657	27.5785	27.5281	27.5226	27.5485	27.545	27.6362	27.4959	27.5317	27.4782	27.4444	27.4987	27.9332	27.4721	27.4473	27.4207	27.5185	27.5671	27.6284	27.7414	27.7181	27.6912	27.7926	27.704	27.8328	27.6846	27.6823	27.7387	27.721	27.6835	27.5952	27.7502	27.6626	27.6614	27.642
P04180	LCAT	Phosphatidylcholine-sterol acyltransferase	22.358	22.5109	22.1843	22.2181	22.0727	22.1175	22.2136	22.0743	22.0603	22.2875	22.1754	21.9822	22.3798	22.4978	22.4568	22.3499	22.3908	22.5474	22.296	22.2582	22.4488	22.4137	22.2491	22.3673	22.4935	22.4107	22.2743	21.9928	22.1684	22.3828	22.2041	22.3017	22.2647	22.2995	22.3303	22.4085	22.6477	22.4587	22.2683	22.3633	22.2484	22.3881	22.2676	22.3433	22.3359	22.409	22.3001
P04196	HRG	Histidine-rich glycoprotein	23.8385	23.8259	23.8741	23.9317	23.8683	23.8241	23.8338	23.7794	23.7783	23.8371	23.7818	23.7935	23.1775	23.3056	23.255	23.1297	23.2673	23.253	23.2736	23.2485	23.2145	23.2447	23.2239	23.2356	23.4511	23.4028	23.5683	23.3866	23.488	23.5534	23.4455	23.368	23.3381	23.3819	23.4625	23.4302	23.5433	23.3701	23.4089	23.41	23.3312	23.3287	23.3417	23.2743	23.3998	23.344	23.2452
P04211	IGLV7-43	Immunoglobulin lambda variable 7-43	23.2413	23.27	23.3656	23.3659	23.3694	23.3943	23.2914	23.3158	23.4255	23.2968	23.2886	23.3122	21.1619	21.169	20.9907	21.2254	21.124	20.8672	21.2719	21.0511	20.2642	21.042	21.0196	20.8958	22.1572	21.5198	22.022	22.1018	22.243	22.1247	22.102	22.1535	22.0495	22.1112	22.1464	22.0254	21.5659	21.8577	21.721	21.9697	22.0024	22.1175	21.8123	22.1379	22.0994	22.2171	21.9776
P04217	A1BG	Alpha-1B-glycoprotein	27.9433	27.8421	27.8646	27.9181	28.0037	28.045	27.9889	28.0325	28.0844	28.015	28.0135	28.0015	28.1411	28.1337	28.0365	28.1662	28.0893	28.1203	27.9874	28.1964	28.1493	28.1274	28.2379	28.125	28.2666	28.263	28.2103	28.3762	28.4294	28.281	28.4742	28.459	28.4658	28.5199	28.4969	28.4711	28.2078	28.0358	28.2021	28.0843	28.0941	28.0823	28.0419	28.0567	28.0719	28.1596	28.118
P04264	KRT1	Keratin, type II cytoskeletal 1	25.1477	24.9834	25.0976	25.1615	25.2597	25.1988	25.1288	25.1499	25.2013	25.1625	25.1606	25.1377	25.2195	25.1363	25.0603	25.0788	25.1774	25.1788	25.1566	25.0263	25.2482	25.3478	25.2811	25.2402	25.1779	24.7914	25.1768	25.1802	25.1754	25.09	25.1293	25.2237	25.1348	25.1173	25.0472	25.0754	24.8392	24.7738	25.1536	24.9163	24.9529	24.9073	24.9313	24.8663	24.955	24.7581	25.1807
P04275	VWF	von Willebrand factor	25.9651	25.9468	25.8859	25.947	25.8071	25.8664	26.0517	25.84	25.8757	25.8916	25.8536	25.958	25.965	25.7761	25.8808	25.7429	25.9195	25.8553	25.91	25.735	25.8408	25.8465	25.8162	25.8219	25.8374	25.84	25.8554	25.8838	25.9514	25.8278	25.8003	25.8289	25.8218	25.7651	25.8018	25.7323	25.6674	25.6723	25.8663	25.7931	25.7713	25.776	25.7342	25.764	25.6246	25.7496	25.7416
P04278	SHBG	Sex hormone-binding globulin	23.4263	23.3281	23.5132	23.8211	23.351	23.4763	23.0456	23.4403	23.3161	23.0996	23.3351	23.5311	23.0582	23.1733	22.8738	22.4708	23.5865	23.109	23.4108	23.6361	23.2973	22.4712	22.7488	23.656	22.6179	22.4973	22.6562	23.2084	23.0833	23.4102	23.2859	23.4131	23.2969	23.4793	22.577	22.5665	23.282	22.9716	23.1576	23.03	23.1838	22.9373	22.8642	22.7844	22.9513	23.0579	23.1097
P04406	GAPDH	Glyceraldehyde-3-phosphate dehydrogenase	28.1236	28.1076	27.8638	28.3279	26.894	27.0948	27.6065	28.0107	27.4281	27.673	28.02	27.4538	27.7111	27.9306	25.6219	27.9323	27.6652	28.5398	27.7923	27.2253	27.5257	26.3796	27.2042	27.2978	27.3216	27.7056	27.8022	27.7924	27.9135	27.2615	27.4467	27.6121	27.9705	27.8998	27.5517	27.506	27.8025	27.9242	27.7973	27.6876	27.6639	27.8595	27.6047	27.6096	27.8354	27.8947	27.8948
P04430	IGKV1-16	Immunoglobulin kappa variable 1-16	20.4572	20.6657	20.7964	20.5668	20.4981	20.5822	20.5747	20.8383	20.7629	20.7997	20.7891	20.7084	20.2935	20.4202	20.0616	20.2958	20.4376	20.2765	20.022	20.3366	20.2582	19.5241	20.3888	20.427	19.9653	20.3844	19.2624	19.8226	20.1925	20.3062	20.1432	19.9701	20.16	20.1499	20.417	19.6134	19.4452	19.8777	19.9711	19.6852	19.8017	19.9112	19.7714	20.1314	20.1374	20.4288	19.9544
P04433	IGKV3-11	Immunoglobulin kappa variable 3-11	26.077	26.1157	26.1428	26.0677	26.0799	25.9664	26.0972	26.019	25.9143	25.9565	26.013	25.911	25.3765	25.6157	25.5141	25.4688	25.5875	25.5334	25.5279	25.4209	25.4057	25.3113	25.4138	25.4298	25.1203	25.0504	24.9492	24.9542	25.0587	25.0376	24.9719	24.8001	24.955	24.9654	25.0467	24.9103	24.7036	25.0725	25.1314	25.0141	25.1992	25.0057	25.0672	25.0004	25.2979	25.3003	25.2923
P05062	ALDOB	Fructose-bisphosphate aldolase B	25.369	25.7883	25.6976	26.4523	24.8627	25.2656	24.4399	25.4376	25.1492	25.2821	24.8904	25.0767	26.262	25.8183	25.387	25.6092	25.6662	27.2159	25.0259	24.6812	25.1496	27.156	24.3135	26.6796	26.4245	25.6332	24.0938	24.5344	25.5328	25.9848	25.8321	25.4719	25.1831	25.7866	25.5172	26.1049	25.6801	25.9861	24.3729	25.1708	26.2293	25.0624	25.8088	26.051	25.3621	25.2694	26.0084
P05067	APP	Amyloid-beta precursor protein	23.0534	23.5452	23.5944	23.2751	23.1939	23.2139	22.8193	22.5338	22.6875	22.9085	22.9038	22.899	23.0923	23.5651	23.3872	23.3602	23.352	22.7855	23.0602	23.2407	23.1456	22.7898	23.1924	22.781	23.2156	23.1178	23.3671	23.2879	23.0646	22.9983	23.4217	23.2972	22.8729	22.8805	23.3361	23.0722	23.6785	23.5672	22.8895	23.4705	23.0973	22.7777	23.463	22.9541	23.5051	23.5191	23.4116
P05089	ARG1	Arginase-1	24.357	24.8392	24.5927	24.5974	24.614	24.3824	23.6965	24.5618	24.4587	24.501	24.4573	24.5564	24.7634	24.8017	24.7987	24.6152	24.7116	24.7438	24.702	24.731	24.4867	24.4508	24.5919	24.5595	24.7544	24.7403	24.7592	24.6511	24.7523	24.7694	24.5729	24.4703	24.5552	24.6022	24.6519	24.5021	24.7325	24.7292	24.6207	24.7412	24.6723	24.7651	24.9594	24.9234	24.5704	24.6354	24.8784
P05090	APOD	Apolipoprotein D	23.453	23.2383	23.4692	23.42	23.458	23.4662	23.482	23.7062	23.6626	23.7101	23.5386	23.6178	23.6277	23.5984	23.4904	23.7764	23.7056	23.5947	23.4688	23.8401	23.7072	23.7798	23.8706	23.7527	23.405	23.0617	23.1751	23.4417	23.4077	23.1652	23.3616	23.37	23.3619	23.4616	23.4111	23.4061	23.7289	23.6168	23.9095	23.8418	23.7419	23.7874	23.6957	23.9774	24.0841	24.0734	24.0609
P05109	S100A8	Protein S100-A8	26.3125	26.207	26.2616	26.0542	26.1046	26.0067	25.7887	26.0242	25.9302	25.9774	25.8264	26.0787	25.7709	25.71	25.8191	25.826	25.8738	25.7954	25.8141	25.8429	25.9412	26.0895	26.0004	25.7637	25.7514	25.6445	25.7418	25.866	25.9663	25.8234	25.667	25.7063	25.8854	25.7065	25.7617	25.855	25.418	25.2985	25.8828	25.8285	25.6793	25.3904	25.4204	25.6298	25.8864	25.8745	25.658
P05154	SERPINA5	Plasma serine protease inhibitor	25.3562	25.3861	25.4478	25.402	25.4503	25.5563	25.3595	25.3745	25.2913	25.2865	25.3323	25.2516	25.6489	25.7035	25.6223	25.5296	25.6768	25.7196	25.5162	25.4809	25.5733	25.592	25.4487	25.5904	25.4511	25.5815	25.3278	25.4128	25.3881	25.3633	25.3468	24.85	25.4153	25.4055	25.0444	25.0768	25.9741	25.8302	25.5551	25.6313	25.5791	25.41	25.4954	25.7424	25.5275	25.5618	25.6562
P05155	SERPING1	Plasma protease C1 inhibitor	24.6013	24.5882	24.6413	24.5979	24.6047	24.619	24.549	24.6096	24.4598	24.5169	24.5738	24.5413	24.9663	24.944	24.8339	24.7899	24.8751	24.7835	24.5916	24.6964	24.7432	24.7056	24.6779	24.6243	24.9	24.7434	24.0614	24.8014	24.8394	24.2496	24.9432	24.692	24.823	24.7292	24.828	24.184	25.0373	24.904	24.8968	25.0109	24.9425	25.0196	24.9014	24.9153	24.8797	24.9036	24.9647
P05156	CFI	Complement factor I	24.4284	24.3999	24.4787	24.5424	24.5321	24.4351	24.4926	24.4672	24.4285	24.5215	24.3482	24.3824	24.7747	24.7847	24.6461	24.659	24.7778	24.6721	24.7966	24.6943	24.6828	24.66	24.682	24.6786	24.5214	24.494	24.4946	24.516	24.5628	24.5057	24.5478	24.5805	24.5882	24.6387	24.6562	24.6092	24.7919	24.7374	24.7486	24.717	24.6178	24.7747	24.7181	24.6302	24.6982	24.7348	24.645
P05160	F13B	Coagulation factor XIII B chain	24.623	24.5329	24.536	24.7256	24.6324	24.6674	24.5562	24.6657	24.5547	24.6224	24.4336	24.5494	24.92	25.1219	25.1594	25.1513	25.1977	25.2464	25.0356	25.107	25.0265	24.9922	25.0548	25.1083	24.7918	24.7491	24.8587	24.9204	24.9742	25.0125	24.7311	24.7133	24.7435	24.6855	24.7549	24.8955	24.7363	24.7258	24.7254	24.9234	24.796	24.7994	24.8025	24.9038	24.947	24.9898	24.8449
P05362	ICAM1	Intercellular adhesion molecule 1	28.7529	28.7414	28.7975	28.7755	28.8643	28.6099	28.568	28.4584	28.5962	28.4332	28.3425	28.3362	28.6727	28.4422	27.9733	28.7394	28.4751	28.5419	28.5646	28.0562	28.733	28.456	28.7753	28.3782	28.471	28.6578	28.7573	28.8107	28.4094	28.5236	28.336	28.4294	28.4857	28.2873	28.5468	28.3854	27.2072	27.5291	28.2832	28.5312	28.169	28.2714	28.069	27.8483	28.443	28.2878	27.856
P05452	CLEC3B	Tetranectin	26.151	26.1425	26.2641	26.382	26.2288	26.1842	26.1248	26.0991	26.0683	26.068	26.1389	25.9294	25.9048	26.0373	26.0202	26.1364	26.1867	26.0919	26.0563	25.9767	25.951	26.0774	26.0921	25.8639	26.0601	26.0508	26.095	26.0624	26.0962	26.0155	26.0342	25.9365	25.8934	25.9022	25.9077	25.9202	25.7531	25.8976	26.0868	26.0077	25.9161	25.8358	25.8587	25.8436	25.9045	26.001	25.9595
P05543	SERPINA7	Thyroxine-binding globulin	23.0419	22.9605	22.9344	22.995	22.9549	22.9963	22.9143	22.9279	22.7448	22.9329	22.8335	22.9117	23.1564	22.9821	23.0576	22.8475	23.1205	22.9935	23.0765	23.067	23.0046	22.8922	23.0485	23.0318	23.0137	23.1627	23.0877	23.0736	23.1609	23.1356	23.1467	23.0351	22.9966	23.0135	23.0892	23.0254	22.9496	22.9972	22.9339	23.0796	23.0685	23.135	23.0415	23.1712	23.1483	23.038	23.1948
P05546	SERPIND1	Heparin cofactor 2	23.0158	23.1245	23.1516	23.0679	23.0977	23.1226	23.19	23.1455	23.1245	23.1103	23.0058	23.0735	23.8059	23.6948	23.6457	23.5171	23.6033	23.665	23.5022	23.5783	23.5342	23.4873	23.4888	23.532	23.5167	23.6583	23.5063	23.4737	23.5702	23.5455	23.5383	23.541	23.517	23.5291	23.6629	23.6204	23.5814	23.0735	23.0329	23.0994	23.1651	23.1015	23.2003	23.3977	23.2841	23.3437	23.4099
P06276	BCHE	Cholinesterase	22.4558	22.329	22.4625	22.4887	22.4242	22.4737	22.4111	22.2851	22.2767	22.4078	22.2577	22.2571	22.6145	22.4794	22.4247	22.2483	22.3843	22.4235	22.3575	22.2973	22.3749	22.2862	22.1217	22.2909	22.7903	22.6242	22.6723	22.6485	22.5696	22.4297	22.6846	22.5739	22.578	22.5053	22.4603	22.5614	22.1207	22.3397	22.2779	22.3309	22.3598	22.3267	22.0636	22.373	22.1759	22.3031	22.3819
P06310	IGKV2-30	Immunoglobulin kappa variable 2-30	24.4655	24.4531	24.7607	24.808	24.8103	24.8566	24.8744	24.9869	24.7916	24.8709	24.8797	24.8499	23.4072	23.2949	23.5528	23.4193	23.5257	23.2508	23.1185	23.3061	23.277	23.238	22.9955	23.435	23.507	23.5279	24.2619	24.1929	24.181	24.0673	24.2303	24.1294	24.1561	24.1191	24.1102	24.2038	22.3605	23.3318	23.8619	23.5948	23.0129	23.2273	22.6783	23.0095	24.1831	23.9028	23.2339
P06312	IGKV4-1	Immunoglobulin kappa variable 4-1	26.1012	26.1117	26.034	25.9939	26.0013	25.9737	25.9053	25.9009	25.7603	25.7617	25.8815	25.7818	25.6274	25.9899	26.0658	25.8649	25.9685	25.9889	25.9004	25.8179	25.7503	25.7081	25.7355	25.7055	25.2513	25.2301	25.1596	25.0027	25.2545	25.3315	25.1669	25.0625	24.9748	24.9721	25.18	25.0757	25.2198	25.4898	25.3879	25.4943	25.4962	25.5105	25.4682	25.6587	25.5953	25.5945	25.5618
P06331	IGHV4-34	Immunoglobulin heavy variable 4-34	23.0646	23.0791	23.11	23.0554	22.97	22.8838	22.7502	22.8161	22.6013	22.7342	22.8087	22.6361	22.3468	22.5213	22.438	22.1578	22.3859	22.3015	22.2363	22.2134	22.2306	22.0033	22.1433	22.1792	22.1431	22.2743	22.3121	22.0456	22.1533	22.1657	22.0027	21.599	21.8701	21.8895	22.148	22.1771	22.1702	22.3621	22.1621	22.2375	22.2369	22.4002	22.0374	22.4764	22.1988	22.2865	22.5181
P06396	GSN	Gelsolin	26.701	26.5319	26.6336	26.6014	26.594	26.5678	26.3814	26.5739	26.5997	26.5736	26.5577	26.4509	26.226	26.4364	26.3537	26.4922	26.4101	26.3168	26.3097	26.4806	26.4942	26.5059	26.4904	26.3704	26.223	26.2399	26.3137	26.3544	26.4419	26.1231	26.2556	26.2062	26.3003	26.3025	26.2559	26.1856	26.0984	26.2449	26.4915	26.4886	26.3963	26.3418	26.2794	26.4482	26.5231	26.4813	26.4628
P06681	C2	Complement C2	27.0252	26.9843	26.9086	27.0037	26.9245	26.964	26.8921	26.9009	26.8578	26.887	26.8969	26.9094	26.9886	26.8341	26.7209	26.7095	26.7132	26.7006	26.8109	26.7816	26.7863	26.7051	26.7618	26.7998	27.1092	26.9464	26.9754	27.1305	27.0135	26.9758	27.1031	26.8595	27.0959	26.9821	27.0113	26.9821	26.9457	26.8948	26.9994	26.9061	26.8808	26.8922	26.9325	26.8301	26.8651	26.8261	26.9389
P06702	S100A9	Protein S100-A9	26.1033	25.9023	25.9998	26.078	25.8626	25.7495	25.8596	25.7089	25.556	25.9685	25.7325	25.8816	25.7091	25.7439	25.6659	25.7727	25.9273	25.8921	25.7099	25.8511	25.2791	25.424	25.5809	25.7646	25.8756	25.6724	25.9735	26.0996	25.8154	25.9945	25.6001	25.6428	25.6037	25.7064	25.7932	25.888	25.447	25.6394	26.2046	26.0768	26.0598	25.538	25.5024	25.597	26.1447	25.9679	25.6813
P06727	APOA4	Apolipoprotein A-IV	25.1321	25.1988	24.9878	24.9012	25.0474	25.4332	25.1461	25.0291	24.7345	24.6851	24.595	24.8002	24.9089	25.4302	25.1347	25.2363	25.2145	25.3046	25.3829	25.3724	25.2281	25.1643	25.0907	25.1599	24.0862	24.3581	24.0749	24.0193	24.1446	24.0624	24.3194	24.302	24.0974	24.0508	23.9992	24.188	26.0694	25.5961	25.6375	25.6014	25.537	25.7527	25.6621	25.6298	25.5395	25.5231	25.4764
P06733	ENO1	Alpha-enolase	23.9347	24.2031	23.7945	24.096	23.9851	23.9459	23.7466	23.7982	23.7802	23.9009	23.537	23.5287	23.5158	23.5118	24.0042	23.1727	23.1712	23.7449	24.3907	23.4284	23.4143	23.2099	23.2665	23.2331	23.6556	23.2671	24.7868	24.161	23.8596	24.1716	23.6443	23.6294	23.5848	23.4931	23.7366	23.8216	22.7304	22.7578	22.8646	23.0602	23.0558	23.3312	23.7775	23.0609	22.9711	23.162	22.9009
P06744	GPI	Glucose-6-phosphate isomerase	23.8575	23.7769	23.9384	24.4494	23.9046	24.2568	23.8181	23.3292	23.6422	23.5669	23.9391	23.9678	23.6236	23.7227	23.5879	23.731	23.9566	23.8214	23.5518	23.4847	23.4259	23.302	23.4662	23.2448	23.4555	23.8063	23.4531	23.602	23.73	23.2761	23.7457	23.624	23.5633	23.5867	23.3827	23.6476	22.845	23.3767	23.6011	23.1796	23.1804	23.2576	23.4649	23.2933	23.5189	23.4112	23.5445
P07148	FABP1	Fatty acid-binding protein, liver	23.8873	23.9384	23.9042	23.6974	23.9318	23.7971	23.8211	23.7824	23.6764	23.8375	23.7826	23.8776	23.7048	23.7671	23.8264	23.6434	23.7404	23.7015	23.9856	23.7471	23.6793	23.7295	23.4643	23.5569	23.8426	23.8606	23.8872	23.8092	23.9322	23.8025	23.856	23.5499	23.7562	23.6401	23.8497	23.7147	22.9859	23.5581	23.3778	23.7385	23.5158	23.5313	23.5577	23.7502	23.6787	23.4838	23.4407
P07195	LDHB	L-lactate dehydrogenase B chain	24.8419	24.3561	24.2777	24.4095	24.0953	24.3103	24.2163	24.2611	24.0086	24.0414	24.2027	24.1281	24.2685	24.5441	24.2786	23.9773	24.3249	24.1865	24.6961	24.3185	24.3676	24.1921	23.9633	24.4264	24.5745	24.384	24.2877	24.0365	24.1196	24.3058	24.0801	24.4148	24.4179	24.3189	24.2939	24.0424	24.4972	24.8219	24.7016	24.8039	24.7141	24.7057	24.6685	24.5754	24.6627	24.5167	24.7922
P07225	PROS1	Vitamin K-dependent protein S	23.783	23.7585	23.8236	23.8036	23.8714	23.7489	23.7476	23.7306	23.713	23.5957	23.7162	23.6842	23.7566	23.855	24.3203	23.6922	23.7328	24.1311	24.2576	23.5836	23.6666	23.5935	23.5839	23.6036	23.932	23.8719	24.4471	23.761	23.8781	24.42	23.8731	23.8643	23.8949	23.8784	23.9487	23.8969	23.7636	23.9366	23.8526	23.8341	23.7543	23.7631	24.5894	23.8808	23.9003	23.925	23.7838
P07237	P4HB	Protein disulfide-isomerase	27.9127	27.8803	27.6313	27.8674	27.6765	27.9619	27.7402	27.8474	27.8291	27.782	27.6578	27.9203	27.3334	27.4936	27.6728	27.7401	26.6281	27.7251	27.792	27.783	27.769	27.8257	27.6241	27.81	28.1232	27.2874	27.4153	27.6898	27.7747	27.7408	27.479	27.7193	27.6777	27.435	27.7113	27.4082	27.3167	27.3569	27.4564	27.3319	27.3942	27.4315	27.0001	27.2893	27.4552	27.4241	27.2726
P07307	ASGR2	Asialoglycoprotein receptor 2	23.0883	23.7523	23.8944	24.2228	23.6667	23.7767	23.8058	23.9616	24.0017	24.0762	23.6569	23.9152	23.9243	23.895	24.1324	23.7196	23.7589	23.8746	24.524	23.7799	23.868	23.6406	23.7547	23.2802	24.0237	22.7168	24.6608	24.2111	23.4421	24.1959	23.8547	23.3666	23.9016	23.8396	24.0599	24.0781	22.3014	23.5069	23.5135	23.6023	23.1533	23.4529	24.1057	21.7962	23.6365	23.237	23.0408
P07333	CSF1R	Macrophage colony-stimulating factor 1 receptor	23.3271	23.6168	23.5918	23.7009	23.6702	23.8929	23.1532	23.9753	23.2014	23.3078	23.7116	23.471	23.0105	23.3372	23.2182	23.2925	23.3616	23.5876	23.4025	23.2824	23.2111	23.2508	23.1838	23.1463	23.1878	23.6828	23.1835	23.4581	23.0429	23.7915	23.3626	23.5897	23.3037	23.1323	23.4647	23.2212	22.7246	22.888	23.1425	23.1875	23.0281	23.287	22.9777	23.2281	23.4412	23.456	23.0386
P07339	CTSD	Cathepsin D	27.3206	27.5774	27.633	27.4459	27.54	27.4214	27.0392	27.2303	28.0199	27.6314	27.0032	27.0086	27.3898	27.6076	27.4804	27.2571	27.2816	27.4279	27.2718	27.3172	27.3061	27.415	27.2704	27.2871	27.2954	27.0899	27.4879	27.3393	27.275	27.2538	27.1384	26.9022	27.2203	26.7001	27.0514	26.9794	26.9301	27.1998	26.8936	26.964	26.7586	26.3287	27.0187	26.6265	27.1764	27.1049	26.9969
P07357	C8A	Complement component C8 alpha chain	27.6227	27.5419	27.693	27.7076	27.8433	27.8502	27.6933	27.6585	27.7221	27.6513	27.5763	27.6616	27.4626	27.2174	27.2729	27.2845	27.2584	27.3082	27.3216	27.2554	27.33	27.3385	27.3142	27.2994	27.6604	27.451	27.4333	27.5752	27.6659	27.4825	27.6455	27.5249	27.5266	27.6287	27.6546	27.6327	27.7361	27.6106	27.6771	27.6171	27.6206	27.7099	27.6494	27.5315	27.6475	27.6837	27.6169
P07358	C8B	Complement component C8 beta chain	23.1219	23.0947	23.1072	23.1729	23.1878	23.2618	23.1715	23.123	23.1107	23.1424	23.1209	23.2205	22.9765	22.9698	22.8947	22.9621	22.9491	22.9783	22.9217	22.8913	22.7668	22.7817	22.8251	22.856	23.0542	22.9544	22.9863	23.0388	23.0777	23.057	23.1016	23.1278	23.0768	23.1556	23.1214	23.1553	23.2462	23.0791	23.1386	23.189	23.1754	23.2193	23.213	23.1437	23.0605	23.1259	23.1461
P07360	C8G	Complement component C8 gamma chain	27.7658	27.6442	27.7238	27.6347	27.5635	27.65	27.5089	27.5298	27.4664	27.4492	27.447	27.6592	27.5407	27.6318	27.5661	27.0541	27.2389	27.5209	27.2886	27.2828	27.28	26.9304	27.3419	27.294	27.8847	27.8528	27.8466	27.7725	27.8719	28.0865	27.8744	27.7129	27.8041	27.5677	27.8391	27.8225	28.0656	27.9186	27.9176	27.9734	28.0311	28.1521	28.035	28.0984	27.813	27.825	28.0742
P07858	CTSB	Cathepsin B	22.0981	21.9803	21.7372	22.1125	21.808	21.5973	21.685	21.5232	21.4393	21.5705	21.6308	21.5313	21.8301	21.7994	22.3453	21.6448	21.66	22.1812	22.5152	21.3979	21.3935	21.4985	21.5773	21.6579	22.1282	22.2335	23.1515	22.4832	22.2635	22.9674	22.0374	21.8248	21.7933	21.654	21.985	22.1648	22.8721	22.8471	21.7717	22.3012	22.6619	22.3966	23.4845	22.6669	22.1098	22.1556	22.6247
P07900	HSP90AA1	Heat shock protein HSP 90-alpha	22.8276	22.747	22.6191	22.6369	22.515	22.3002	22.5583	22.2034	20.6387	20.8658	22.2705	22.3938	22.5883	22.651	22.9206	22.3771	22.0521	22.4514	22.8088	22.1933	22.3436	21.8789	22.0232	22.1091	22.5599	22.7319	23.0228	22.6538	22.6903	22.8358	22.4941	22.5134	22.4376	22.5865	22.6567	22.632	22.2992	22.2553	21.7115	22.1633	21.8726	21.9402	22.9137	21.8084	21.6097	22.3762	21.6772
P07911	UMOD	Uromodulin	28.881	28.6743	28.15	28.5368	28.2461	25.5257	28.0199	27.8579	28.6955	27.8816	27.7199	27.8171	28.0671	28.1	28.4135	27.7672	27.7871	27.8627	28.0077	26.1283	28.2443	28.1853	27.9035	27.9856	27.8122	26.7111	27.7407	25.5012	27.6308	27.9125	28.0611	25.8894	27.829	27.0881	27.896	28.2261	27.7523	26.7512	27.5237	26.9464	27.9889	27.5437	27.7131	27.3344	28.6175	27.5411	27.8499
P07942	LAMB1	Laminin subunit beta-1	24.7143	24.5032	24.7721	24.2873	24.9461	25.1661	24.7161	24.4859	24.7175	24.6615	24.6263	24.9156	23.8111	23.7784	23.9301	23.8555	23.8482	24.1778	24.1048	24.1444	24.2242	24.2602	24.173	23.7742	24.0976	24.0197	23.6527	24.259	24.056	24.0258	24.181	24.1369	24.452	23.8751	23.9389	24.2558	23.8277	24.0216	24.1533	24.2354	24.2693	24.0144	24.2766	23.8917	24.3595	24.2973	24.3134
P07996	THBS1	Thrombospondin-1	25.5893	25.3601	25.3967	25.27	25.3325	25.4201	25.4146	25.5025	25.3944	25.3094	25.3641	25.2728	25.5093	25.1137	25.1175	25.167	25.2875	25.2679	25.3666	25.3308	25.2071	25.0806	25.419	25.3206	25.101	25.2892	25.3399	25.4608	25.4463	25.3828	25.347	25.5456	25.4197	25.3723	25.3446	25.5131	25.1769	25.192	25.3217	25.205	25.2387	25.4916	25.369	25.2608	25.3418	25.4945	25.4642
P07998	RNASE1	Ribonuclease pancreatic	26.1556	26.07	21.5629	22.3841	26.3641	22.3743	26.1307	22.0521	26.2821	26.2487	26.3828	22.4567	22.3751	26.399	21.5813	26.5228	26.4994	26.4807	26.5956	21.8177	21.1927	26.359	26.6438	21.9558	21.5023	25.7377	25.9628	21.428	25.2386	21.2228	25.4619	21.2494	21.271	21.127	25.1613	21.2576	25.2355	24.5639	21.0962	25.6705	25.0513	25.7049	20.5142	20.7705	25.2929	22.2431	22.0929
P08185	SERPINA6	Corticosteroid-binding globulin	26.9257	26.8064	26.9666	26.9642	26.8668	26.8955	26.8669	26.8723	26.89	26.9539	26.8511	26.8805	26.9095	26.9958	27.003	27.1067	27.027	27.0906	26.8521	26.8416	26.9943	26.9391	27.0446	26.9413	26.9899	26.9056	26.8257	26.7679	26.9285	26.9419	26.8257	26.8775	26.8915	26.7722	26.6654	26.774	27.0124	26.8051	26.8843	26.9739	26.9907	26.9769	26.8546	26.9707	26.9406	27.0363	26.9916
P08253	MMP2	72 kDa type IV collagenase	22.4563	22.8231	22.6957	22.3314	21.9091	22.6289	23.163	23.1026	23.2839	22.3441	22.9978	23.109	22.6125	22.1572	21.6767	22.4001	22.2702	22.907	22.6631	21.4747	22.6735	22.0611	22.0277	22.044	22.4569	22.3966	22.5989	22.5834	22.5596	21.8312	22.385	22.6044	22.2799	22.3423	22.2516	22.384	21.814	21.9291	22.7321	22.5438	21.4022	21.9613	22.2405	22.2302	21.6105	22.2179	21.7003
P08519	LPA	Apolipoprotein(a)	28.8472	29.0717	29.0586	28.8865	28.6745	29.0581	28.9379	28.8569	28.8085	28.8871	28.4128	28.9343	29.0178	28.8674	29.001	28.8309	28.8411	28.8468	28.9103	28.59	28.5514	28.6334	28.7713	28.8357	29.0276	29.1828	29.1882	29.1843	29.1452	29.1399	29.1535	29.4345	29.1451	29.0965	29.2942	29.2317	29.3473	29.0936	29.2002	29.3728	29.4299	29.1509	29.3229	29.2144	29.3126	29.2301	29.1905
P08571	CD14	Monocyte differentiation antigen CD14	25.3271	25.0235	25.2142	25.3266	25.4184	25.6922	25.1677	25.0131	25.3375	25.3745	25.2581	25.4402	25.5571	25.5176	25.4257	25.5635	25.5345	25.5627	25.452	25.5644	25.5473	25.3934	25.4873	25.4711	25.0852	25.3061	25.2453	25.3507	25.5325	25.1285	25.2932	25.1377	25.3674	25.3155	25.2663	25.3059	25.3643	25.2762	25.4662	25.4515	25.4533	25.5354	25.4136	25.5876	25.482	25.5365	25.5308
P08581	MET	Hepatocyte growth factor receptor	22.7734	22.7197	22.7909	22.6687	23.0471	22.9412	23.1386	22.3163	23.444	23.0239	22.8374	22.8455	22.6141	22.2674	22.6637	22.9159	22.7761	22.8283	22.4209	22.777	22.7298	22.8843	22.8512	22.8791	22.3636	22.5669	22.5825	22.2106	22.5173	22.3846	22.6829	22.5696	22.7034	22.6443	22.5964	22.6954	21.8938	22.1948	22.6758	22.4139	22.3377	22.6329	22.5067	22.4077	22.8046	22.8425	22.423
P08603	CFH	Complement factor H	26.5738	26.6093	26.5983	26.5682	26.6379	26.617	26.6179	26.5349	26.4971	26.5347	26.4816	26.5285	26.8117	26.7808	26.777	26.7207	26.7348	26.7707	26.8174	26.6559	26.6486	26.663	26.6608	26.6679	26.9165	26.6967	27.0317	26.8685	26.8927	27.0192	26.9008	26.8409	26.8528	26.8506	26.9035	26.905	26.6821	26.6778	26.6024	26.6152	26.5979	26.6674	26.7972	26.6466	26.6763	26.688	26.6281
P08697	SERPINF2	Alpha-2-antiplasmin	25.9149	25.7059	25.8128	25.6273	25.7469	25.7388	25.6579	25.7707	25.5598	25.5837	25.6284	25.6802	25.8499	25.8777	25.8245	25.7008	25.7689	25.9652	25.7781	25.7443	25.6554	25.6867	25.7444	25.8348	25.6813	25.6964	25.4458	25.4348	25.6237	25.7469	25.6202	25.6071	25.6009	25.5029	25.6197	25.665	26.4066	26.0019	26.0561	26.1579	26.106	26.2564	26.0986	26.2721	26.152	26.1733	26.2484
P08709	F7	Coagulation factor VII	21.8442	21.8385	21.6457	21.8108	21.7499	21.8231	21.844	21.8877	22.3563	21.7785	21.9534	22.0399	21.8991	21.9069	21.9154	21.5335	21.7223	21.819	21.822	21.9697	21.5308	21.626	22.0497	21.7075	22.1346	21.9404	21.8758	21.9393	21.8601	22.1367	21.7596	21.9751	21.9448	21.9373	21.8307	22.1023	21.8367	21.6995	21.7486	21.6083	21.6076	21.6228	21.8818	21.8109	21.6506	21.772	21.9457
P08758	ANXA5	Annexin A5	29.1155	29.1078	29.1305	29.353	29.1415	29.3859	29.2717	29.2172	29.2075	29.3016	29.0935	29.1639	29.0742	29.2043	29.1175	29.2479	29.1318	29.0196	28.9298	29.1749	29.2159	29.1796	29.2689	29.3001	28.9397	29.2583	29.0732	29.043	29.0911	28.9216	28.8715	28.7157	28.9481	28.9451	28.9056	28.9178	28.8325	25.85	28.9487	24.9912	28.9727	28.8477	28.7544	28.84	28.8539	28.9764	23.8711
P09172	DBH	Dopamine beta-hydroxylase	22.9863	23.4209	22.893	23.058	22.6249	23.5927	22.8294	22.6173	22.7355	22.8638	22.7255	22.5432	23.3828	22.9007	22.9564	23.4566	22.8527	23.4467	23.5302	23.1069	23.188	23.0667	23.2257	23.1341	23.6877	23.1079	23.1937	23.2751	23.2078	22.9914	23.5382	23.37	23.484	23.3141	23.3614	23.2715	22.2671	22.0682	22.1931	21.7091	22.3127	22.4498	22.3217	22.1449	22.5508	21.9889	22.0692
P09211	GSTP1	Glutathione S-transferase P	22.665	23.4046	23.3926	23.3787	22.9533	23.1598	22.8638	22.8386	22.6361	23.1478	22.7461	22.7306	23.7091	23.6176	23.6341	22.8849	23.3973	23.2509	23.3939	23.2735	23.2211	23.2688	23.1752	23.2727	23.5967	23.6369	23.559	23.3027	23.4124	24.0601	23.3251	23.3856	23.3102	23.2732	23.512	23.3516	23.6232	23.6203	23.2862	23.5221	23.682	23.2903	23.559	23.653	23.052	23.3279	23.6153
P09486	SPARC	SPARC	24.6918	24.2606	24.4374	24.7217	24.308	24.1709	24.5391	24.5854	24.6879	24.6429	24.5712	24.1083	24.3681	24.2115	24.4123	24.3142	24.2465	24.2561	24.4297	24.3029	24.2066	24.3258	24.3976	24.4006	24.0491	23.9765	23.9905	24.1584	24.2733	24.0429	24.0724	24.2598	24.2154	23.9807	24.2324	24.2556	24.0835	24.3516	24.2816	24.4106	24.3636	23.851	24.165	24.2424	24.0038	24.0752	24.1335
P09668	CTSH	Pro-cathepsin H	23.9869	23.5462	23.8439	23.5886	23.5896	24.1086	23.2329	22.8939	24.2443	23.5798	23.7679	24.1126	23.8845	23.4295	23.4549	23.8222	24.1403	23.7711	24.2003	23.8344	23.4834	23.1796	23.4526	23.8348	23.7039	23.2867	23.8547	24.6027	23.96	23.7653	23.2332	23.7866	23.899	23.6286	24.0057	23.9124	23.0437	23.692	23.6184	23.5012	22.8332	23.8135	23.94	23.6099	23.7857	23.44	23.7922
P09871	C1S	Complement C1s subcomponent	25.3293	25.3554	25.3233	25.2672	25.2795	25.3397	25.3101	25.2956	25.3169	25.3048	25.2344	25.3358	25.0121	25.0635	24.9557	25.0067	24.9872	25.0962	25.0991	25.1484	25.0296	25.0853	25.0454	25.1345	25.0529	24.9767	24.8303	24.9887	25.0866	25.0506	25.1355	25.1044	25.0403	25.0917	25.0793	25.1275	25.1791	25.1677	25.1498	25.1506	25.1225	25.2607	25.1345	25.2177	25.2428	25.1149	25.1231
P09960	LTA4H	Leukotriene A-4 hydrolase	25.3103	25.2319	25.5156	25.6465	25.5242	25.5011	25.4344	25.5372	25.6634	25.4986	25.5083	25.5825	25.6426	25.4194	25.3109	25.4617	25.8007	25.3352	24.7462	25.5146	25.4369	25.5917	25.4785	25.4833	25.5047	25.2042	25.6445	25.6191	25.5459	25.581	25.2204	25.7409	25.5847	25.5398	25.5894	25.5779	24.7957	24.9108	25.516	25.3007	25.0933	25.2288	24.6889	25.1992	24.5902	24.9133	25.1028
P0C0L4	C4A	Complement C4-A	21.6275	21.8804	21.8439	21.9429	21.8053	21.8515	22.0041	21.7615	21.8929	21.83	21.8732	22.0302	22.4035	22.3692	22.921	22.1671	22.3789	22.6172	22.6409	22.1996	22.2774	22.3505	22.1226	22.1607	22.7879	22.6054	23.1605	22.4603	22.6967	23.2655	22.8731	22.6829	22.7026	22.5492	22.659	22.7512	20.4525	20.909	20.7468	20.8773	21.3174	21.0903	21.9513	20.9404	21.0468	20.8553	20.8795
P0C0L5	C4B	Complement C4-B	26.6238	26.611	26.5824	26.5402	26.5343	26.5887	26.6049	26.5067	26.4269	26.4879	26.4983	26.5389	27.02	26.8069	27.1521	26.6772	26.7159	26.9859	27.1216	26.8142	26.7864	26.7366	26.7925	26.7775	27.1812	27.1017	27.4941	27.0179	27.1956	27.5351	27.2933	27.2181	27.1378	27.1489	27.2271	27.2072	26.8258	26.9353	26.7447	26.7742	26.8356	26.873	27.4877	26.7577	26.6782	26.6934	26.6905
P0CG47	RPS27A	Polyubiquitin-B	22.3878	22.5891	21.286	22.5979	22.6443	23.2881	21.3437	22.2294	22.8396	22.0443	22.7706	22.5529	23.1673	22.4566	20.7907	21.1154	22.1248	22.093	22.0382	21.9136	21.0382	22.1511	23.8349	22.6576	21.9375	22.0108	22.1108	21.66	21.6813	24.3152	21.9574	21.4386	21.8131	23.3771	21.9488	21.8048	21.0161	23.2754	23.5297	23.3187	23.1488	22.2037	23.3752	22.8562	22.2837	21.9769	21.6704
P0DJI8	SAA1	Serum amyloid A-1 protein	20.8923	19.6412	19.619	19.8987	20.2847	22.1462	20.1872	19.9936	19.9239	19.6454	20.0636	21.5446	22.4968	21.4324	21.3696	21.1323	21.2722	21.302	21.6924	21.2117	21.165	21.42	21.2654	21.6338	21.5615	22.3244	22.4088	22.2706	22.2403	22.5292	23.2673	22.3785	22.0754	22.4379	22.166	22.4857	20.8439	20.8505	21.1014	20.998	20.9986	21.6371	21.1173	21.7343	21.7799	21.9246	21.52
P0DMV8	HSPA1A	Heat shock 70 kDa protein 1A	22.565	22.5408	22.6048	21.5382	21.5132	21.192	22.4145	22.0891	22.3374	22.046	22.3288	22.1738	22.5548	22.7076	22.5656	22.2111	22.2356	22.5119	25.4736	22.3173	21.7944	21.7528	22.0312	22.3267	22.1776	22.4674	21.9297	22.3501	22.5733	22.6156	22.2737	22.4799	21.9803	21.9658	22.4526	22.2144	22.23	22.248	21.9361	22.2688	22.5088	22.274	22.6684	22.0414	21.9831	22.0088	22.2778
P0DOY3	IGLC3	Immunoglobulin lambda constant 3	26.1221	25.9972	26.155	26.2104	26.1193	25.9603	25.92	25.9482	25.9776	26.0259	26.0122	26.0302	25.6876	25.5045	25.5271	25.5684	25.5436	25.715	25.6425	25.6012	25.675	25.5163	25.4797	25.6565	25.8526	25.9328	25.8296	25.852	25.8724	25.8168	25.7725	25.9015	25.8162	25.7868	25.8276	25.8158	25.3064	25.6186	25.742	25.798	25.709	25.5201	25.6659	25.737	25.8371	25.8225	25.762
P0DP01	IGHV1-8	Immunoglobulin heavy variable 1-8	25.2798	25.3127	25.2255	25.0964	25.455	25.3034	24.5663	24.9031	24.9878	24.9439	24.8335	24.5245	25.1287	25.4589	25.8074	26.6548	25.9895	25.5194	25.4707	25.1675	25.1692	25.201	25.4091	25.7951	24.9871	24.4165	24.8675	24.7169	25.0288	25.159	24.895	24	24.6548	24.796	24.7893	24.9202	24.6961	24.535	25.1828	25.224	24.873	25.0812	24.9476	25.0876	25.1145	25.0932	25.0921
P0DP23	CALM1	Calmodulin-1	27.2698	26.7252	26.9236	26.6486	25.4168	27.0504	26.5645	26.5806	27.0941	26.6059	26.9934	26.5523	26.7426	26.7063	25.6512	26.7942	27.1748	26.7268	26.9184	26.4702	26.6041	27.1142	26.9711	27.3289	26.6202	26.2432	26.7867	26.7316	26.5633	26.6106	26.7347	27.0243	26.9649	26.5477	26.4899	26.5967	27.0513	26.4407	26.8742	26.8655	26.9334	27.0924	25.5919	25.2347	27.0715	25.9055	25.8131
P10586	PTPRF	Receptor-type tyrosine-protein phosphatase F	24.6146	23.8407	24.5138	24.1561	24.4315	24.7723	24.3865	24.4136	24.5044	24.3297	23.9858	24.2427	24.1359	24.1179	24.3347	24.173	23.978	24.3349	24.3297	24.3238	23.8505	23.806	23.9802	23.8488	24.4255	24.2637	24.6597	24.1943	24.2059	24.4628	24.3137	23.9966	24.2427	24.2298	24.2518	24.1848	24.013	24.4281	24.0728	24.2321	23.7806	24.2578	24.1521	23.589	24.0817	24.197	24.1418
P10643	C7	Complement component C7	26.1979	26.201	26.2115	26.1829	26.168	26.1616	26.1838	26.161	26.1485	26.2139	26.1626	26.1389	25.463	25.4164	25.3321	25.4576	25.4285	25.4723	25.3905	25.3735	25.3212	25.2904	25.3892	25.3768	25.9505	25.9551	25.9241	25.9879	26.0514	25.9639	26.008	25.9292	26.0038	25.976	26.0243	26.0076	26.081	26.0506	26.0718	26.0275	26.0285	26.0157	26.1136	26.0862	26.0838	26.1475	26.1042
P10721	KIT	Mast/stem cell growth factor receptor Kit	24.3625	24.3634	24.2087	24.5901	24.35	24.394	24.3766	24.5278	24.2062	23.9947	24.2573	24.2248	23.9647	24.2233	24.0064	24.2319	24.2582	24.2954	24.1219	24.342	24.2704	24.525	24.3395	23.7999	24.2615	24.3228	24.1993	24.1733	23.9997	23.9847	23.9922	24.2115	24.1658	24.0007	24.2157	24.0066	23.5226	24.0196	24.4687	24.2582	23.7545	23.8245	23.8081	23.5988	23.5497	23.7789	23.4892
P10909	CLU	Clusterin	24.5224	24.5551	24.5045	24.4756	24.5613	24.5945	24.5625	24.6068	24.7158	24.6233	24.6589	24.6069	24.8301	24.8062	24.8342	24.7882	24.8256	24.9847	24.8742	24.8747	24.8854	24.816	24.8593	24.8721	24.8159	24.6362	24.5878	24.602	24.7092	24.8625	24.8006	24.8126	24.8205	24.8034	24.8585	24.97	25.0254	24.9446	25.0255	25.0617	25.0506	24.9676	24.9353	25.0684	25.0005	24.9698	25.0245
P11021	HSPA5	Endoplasmic reticulum chaperone BiP	24.0199	23.6763	24.0721	23.9498	23.8322	23.912	23.8766	24.017	23.8775	23.7431	23.8386	24.0003	23.6037	23.4339	23.3304	23.4551	23.3158	23.3538	23.339	23.1891	23.5558	23.3238	23.3189	23.4516	23.5138	23.6409	23.2782	23.4252	23.6696	23.1201	23.4946	23.6049	23.4692	23.5273	23.5376	23.531	23.6085	23.4887	23.8927	23.5795	23.5265	23.3237	23.5367	23.5249	23.347	23.4812	23.5217
P11047	LAMC1	Laminin subunit gamma-1	22.2682	22.0222	21.7729	22.5504	22.4606	22.8343	22.3339	22.6609	22.8715	22.2293	22.2184	22.499	21.789	21.5945	22.1546	22.0422	21.9455	22.228	22.3995	22.1254	21.9001	22.5867	21.9151	22.7132	22.3962	22.3146	22.9842	22.6309	21.9137	22.2116	22.0139	21.1959	21.9691	21.8826	22.0742	22.1107	21.4909	21.608	21.8873	21.5057	22.4926	21.597	21.1513	21.4181	21.7979	21.9513	21.4143
P11142	HSPA8	Heat shock cognate 71 kDa protein	27.3974	27.3995	27.141	27.0005	27.3043	27.3094	27.2253	27.2794	27.0582	27.2638	27.184	27.0422	27.2886	27.1644	27.1599	26.8816	27.111	27.4275	27.2576	27.3347	27.2117	27.2187	27.3749	27.2637	27.2166	27.3008	27.2635	27.2239	27.381	27.361	27.2352	27.1412	27.1587	27.0625	27.3125	27.3597	26.8086	27.3311	27.2825	27.245	27.1882	27.3603	27.2963	27.3599	27.3255	27.3355	27.2264
P11226	MBL2	Mannose-binding protein C	21.1605	21.3594	21.2799	21.1481	21.3901	21.7098	21.9244	21.8329	21.5263	21.6548	21.6933	21.5918	20.8553	20.5286	20.8994	20.1092	20.268	20.6285	20.6839	20.5834	20.3731	20.1979	20.5928	20.5782	20.4561	20.8131	21.2464	20.7135	20.7471	20.6606	20.7442	20.6567	20.6896	20.5615	20.3235	20.7281	19.7877	19.4906	19.4865	19.517	19.7166	19.9601	19.6754	19.9868	19.8513	20.0352	20.2373
P11597	CETP	Cholesteryl ester transfer protein	23.6921	23.4158	23.3697	23.2842	23.2854	23.362	23.5913	23.4578	23.5234	23.5502	23.5924	23.5432	23.4006	22.8766	22.6604	23.0996	23.5263	23.362	22.8061	23.1244	23.7684	23.6946	23.1312	22.8328	23.3899	23.0968	23.1024	23.5422	23.616	23.5016	23.3623	23.4249	23.4638	23.3482	23.4795	23.5353	23.4353	22.8348	22.7395	22.9191	23.2323	24.5383	23.3211	23.0632	22.7136	23.126	22.6331
P11717	IGF2R	Cation-independent mannose-6-phosphate receptor	28.0781	28.1402	28.0892	28.1925	27.9218	27.7954	27.8481	27.7023	27.8637	27.9047	27.7557	27.8787	28.0807	27.9212	28.3467	27.991	28.0917	28.1021	28.2967	28.085	27.6832	27.9265	27.7934	27.8339	28.073	28.1899	28.1424	28.197	28.0909	28.2449	27.8835	27.9655	27.9894	28.0408	27.9893	27.8507	27.9222	27.7485	27.9352	27.911	27.829	27.448	27.7695	27.879	27.645	27.8156	27.9453
P12109	COL6A1	Collagen alpha-1(VI) chain	23.4191	22.8839	23.4226	23.1063	23.8432	23.3239	23.4671	23.3368	23.7034	23.2583	23.3711	23.4416	23.1858	23.4673	23.575	23.5526	23.6614	23.9948	23.2191	23.5772	23.3678	23.3499	23.3396	23.2492	23.9076	23.4898	23.5904	23.3913	23.4277	22.627	23.3332	23.351	23.6728	23.4569	23.2732	23.0872	23.6988	23.205	23.1953	23.3381	23.0198	22.9371	23.0323	23.4688	23.4615	23.2124	23.1558
P12111	COL6A3	Collagen alpha-3(VI) chain	25.9877	26.195	25.8504	25.8597	25.861	25.9906	25.9226	25.9761	25.8645	25.8944	25.8854	26.0256	25.8879	25.8253	25.7745	25.8805	25.719	25.7562	25.6457	25.6226	25.793	25.6992	25.8784	25.6368	25.7815	25.5273	25.5712	25.6191	25.6778	25.6902	25.7425	25.7806	25.8512	25.7072	25.8258	25.7458	25.5628	25.5246	25.6088	25.8629	25.4239	25.8626	25.5678	25.5311	26.0012	25.6409	25.5691
P12259	F5	Coagulation factor V	27.2202	27.34	27.2961	27.3994	27.3143	27.3108	27.3305	27.3094	27.4187	27.2812	27.3646	27.3268	27.1692	27.09	27.1904	27.1544	27.1843	27.3211	27.3311	27.2291	27.0165	27.1687	27.312	27.2334	27.3052	27.1584	27.3884	27.3141	27.3504	27.2342	27.2935	27.2207	27.2743	27.2774	27.2893	27.3458	27.2	27.1758	27.2404	27.2554	27.1808	27.2667	27.1812	27.2435	27.2842	27.2895	27.2263
P12814	ACTN1	Alpha-actinin-1	27.3018	27.276	27.1485	27.2696	27.0633	27.1381	27.1568	27.0601	27.0393	27.1847	27.0951	27.0815	27.0703	26.9983	26.9769	27.0319	27.0273	27.0835	26.9871	26.8351	26.8762	26.8758	26.9115	26.9131	27.0756	27.125	27.0655	26.9693	27.0739	27.0882	26.9966	26.8774	27.0057	26.9745	27.0531	27.0241	26.7536	26.9319	26.8488	26.957	27.0584	27.0037	27.002	27.0171	26.9976	26.9785	26.9667
P12821	ACE	Angiotensin-converting enzyme	25.9519	25.9596	25.9813	26.0624	25.787	25.936	25.9518	25.7602	25.4526	25.545	25.8624	25.8545	25.8918	25.685	25.7384	25.726	25.7779	25.6966	25.8112	25.6177	25.4988	25.5281	25.3641	25.6346	25.7581	25.3216	25.7112	25.6764	25.8066	25.4905	25.7347	25.5221	25.7723	25.5888	25.7314	25.788	25.4809	25.7092	25.3405	25.6071	25.6131	25.8186	25.6407	25.8244	25.7309	25.5368	25.4061
P12830	CDH1	Cadherin-1	23.7239	23.273	23.8695	23.6859	23.7251	23.8097	23.6275	23.5637	23.5939	23.5873	23.5336	23.2289	23.6894	23.8483	23.3731	23.531	23.6957	23.2602	23.6901	23.4981	23.6779	23.4824	23.3869	23.3748	23.9853	23.8922	23.6421	23.9965	23.9675	23.816	23.863	23.8595	23.7469	23.8179	23.3698	23.6878	23.6479	23.6272	23.708	23.7031	23.6732	23.6358	23.5811	23.5441	23.7436	23.6255	22.9097
P12955	PEPD	Xaa-Pro dipeptidase	24.1061	24.1427	24.1665	24.0873	24.0146	24.2294	24.1579	24.1434	24.1825	24.1733	24.1396	24.1795	24.1305	24.2732	24.1531	24.2236	24.2712	24.1347	24.0393	24.2716	24.3064	24.2301	24.244	24.2162	24.3286	24.1239	24.1309	24.2623	24.3617	24.1373	24.341	24.2185	24.1861	24.1577	24.2677	24.2466	24.1974	24.1177	24.3133	24.198	24.0898	24.2451	24.0277	24.3175	24.3057	24.2698	24.3068
P13489	RNH1	Ribonuclease inhibitor	20.0741	20.2591	19.7055	19.8975	19.4055	19.2881	19.2438	18.9501	18.7295	19.0969	18.8157	18.747	19.6907	20.2983	20.6567	19.1642	19.5113	19.9315	20.5439	19.3618	19.2258	19.0291	19.1625	19.1943	19.7342	20.5474	20.9118	19.8152	19.5854	20.4226	19.1029	19.3665	19.0688	18.9733	19.4447	19.4187	20.1382	20.0184	18.7097	19.1825	19.4554	19.1012	20.4611	19.6817	18.686	18.8166	19.5357
P13591	NCAM1	Neural cell adhesion molecule 1	25.7091	25.8297	25.9779	26.052	25.9676	25.6717	25.9187	26.088	26.0729	26.1986	26.2305	26.0101	25.7667	25.884	25.8877	25.4747	25.7133	25.5035	25.8565	25.7345	25.4978	25.8823	25.8995	25.9043	25.4697	25.6899	25.4986	25.7302	25.664	25.5252	25.4073	25.579	25.7333	25.6919	25.5203	25.6626	25.6646	25.7206	25.1906	25.3651	25.5985	25.5715	25.7633	25.801	25.62	25.5689	25.7122
P13645	KRT10	Keratin, type I cytoskeletal 10	25.165	25.2279	25.2177	25.2276	25.2532	25.2537	25.153	25.25	25.2895	25.1641	25.1295	25.1596	25.1098	25.2615	24.9346	25.014	25.1513	24.9467	25.114	25.2133	25.3208	25.1889	25.0583	25.1169	24.9287	25.0141	25.1655	24.9746	25.1553	24.7878	25.0685	24.9639	24.7398	25.0361	25.0531	25.0185	24.3656	24.7629	24.8399	24.7428	24.8616	24.8835	24.5887	24.793	24.8476	24.9495	24.8597
P13647	KRT5	Keratin, type II cytoskeletal 5	26.8794	26.9892	26.9394	26.9188	26.8828	26.8924	26.7996	26.7397	26.6453	26.5757	26.7205	26.7158	26.6834	26.8174	26.6518	26.6656	26.7228	26.6739	26.5784	26.6315	26.6641	26.5731	26.7083	26.5244	26.6267	26.6181	26.555	26.6523	26.5634	26.7375	26.5465	26.5582	26.4991	26.5029	26.5504	26.4458	26.2638	26.4677	26.3671	26.4237	26.4697	26.3819	26.5938	26.4137	26.5918	26.4321	26.3575
P13671	C6	Complement component C6	27.3282	27.439	27.517	27.5156	27.4399	27.5589	27.5338	27.4311	27.4389	27.4441	27.455	27.4784	27.2738	27.3104	27.2292	27.2394	27.3035	27.3338	27.2947	27.2936	27.2595	27.2597	27.2645	27.2859	27.4716	27.3207	27.3503	27.3583	27.4305	27.4543	27.503	27.4453	27.3846	27.3892	27.4815	27.5146	27.4849	27.4597	27.4751	27.4281	27.3782	27.5097	27.4107	27.4607	27.462	27.4239	27.3957
P13727	PRG2	Bone marrow proteoglycan	28.3661	27.758	28.2605	27.8156	27.533	28.6589	28.1115	28.0594	28.3462	28.1599	28.0262	28.1606	28.0141	27.804	28.888	28.1101	28.3191	28.0944	27.9111	28.1215	28.2033	28.2945	27.3224	27.8065	28.1428	27.8277	27.9663	27.9927	28.2566	28.0292	28.1766	28.3832	28.2416	28.2169	27.9988	28.0406	27.8501	27.3639	27.8843	27.7666	27.7691	27.1877	28.3894	27.9973	28.0347	27.6606	27.9434
P13796	LCP1	Plastin-2	27.2286	27.248	27.1704	27.1693	26.989	27.3524	27.1916	27.1587	27.004	27.1618	27.0436	27.0312	26.8866	26.9162	26.9004	27.0356	26.8484	27.1074	26.7708	26.9643	27.1526	27.0098	27.0509	27.0903	26.8057	26.9429	26.9177	26.9524	27.0822	26.9157	27.0735	26.8154	27.1743	26.9175	26.3994	26.9971	27.2114	27.0873	27.1263	27.1345	27.1749	26.9856	27.3877	27.1397	26.9133	27.0944	27.2775
P14151	SELL	L-selectin	28.9654	29.1295	29.0433	29.0698	28.9107	28.7829	28.7665	28.7538	28.7968	28.6233	28.7276	28.8908	28.7573	28.8479	28.9147	28.836	29.0167	28.9361	28.8999	29.0646	28.8826	29.0492	28.9735	28.8112	28.7739	28.4458	28.5472	28.6768	28.4446	28.6485	28.7208	28.3007	28.369	28.5278	28.6995	28.5325	28.573	28.6113	28.6	28.6077	28.3045	28.5478	28.5521	28.2509	28.4887	28.3386	28.3892
P14618	PKM	Pyruvate kinase PKM	23.4531	23.7283	23.5586	23.7611	23.5574	23.6553	23.8029	23.57	23.6032	23.6994	23.6505	23.5983	23.1627	23.8281	23.6343	23.5265	23.5007	23.8577	23.513	23.6345	23.5684	23.2453	23.644	23.6237	23.3673	23.641	23.5701	23.3205	23.597	23.4994	22.9167	23.476	23.4627	23.1054	23.5224	23.5476	23.5248	23.3738	23.3813	23.4269	23.3397	23.2096	22.9623	23.7014	23.7556	22.954	23.6199
P14625	HSP90B1	Endoplasmin	24.9827	24.8595	24.7751	25.1833	24.9706	24.9374	24.8007	24.9169	24.9929	24.8511	24.9375	25.0403	24.6279	24.7832	24.8659	24.7019	24.6257	24.856	25.1188	24.6981	24.8469	24.8883	24.9707	24.9146	24.5699	24.7106	24.7476	24.6033	24.9859	24.5303	24.7087	24.5534	24.6873	24.8193	24.727	24.724	24.558	24.622	24.511	24.6573	24.3838	24.7687	24.4952	24.5597	24.6319	24.7294	24.6313
P14923	JUP	Junction plakoglobin	25.7413	27.2566	25.1948	24.5574	25.5368	25.54	26.4547	25.5399	26.2525	26.4022	26.7412	27.2367	27.1866	26.2033	26.092	26.3406	27.3677	26.3585	26.0518	26.5036	26.2929	26.5052	27.179	26.3101	25.8014	25.2474	26.6888	26.2118	25.3345	26.4191	26.4496	26.6133	26.6363	25.3915	25.7053	26.5721	27.1553	27.0028	26.7956	27.31	27.2312	26.2615	27.0043	27.1627	26.2652	26.2818	27.0531
P15144	ANPEP	Aminopeptidase N	28.4062	28.2411	28.2726	28.3487	28.1586	28.4324	28.216	28.2805	28.4746	28.2747	28.2722	28.1865	28.3328	28.5377	28.5481	28.424	28.5529	28.5703	28.4915	28.3151	28.0452	28.4094	28.4437	28.2202	28.1096	28.1709	28.1629	28.235	27.967	27.9994	28.1045	28.0276	28.3089	27.9795	28.0193	28.0735	28.0273	28.3437	28.1274	28.3278	28.195	28.1311	28.0743	28.1973	27.9618	28.1918	28.0954
P15151	PVR	Poliovirus receptor	22.9591	22.9798	23.0327	23.1352	23.0113	22.9981	23.0656	23.0742	22.8888	23.0255	23.0756	22.9828	22.7893	22.6377	22.5215	22.712	22.6217	22.7462	22.5059	22.6224	22.7727	22.7899	22.7576	22.6239	22.8065	22.0863	22.7441	22.8535	22.8822	22.8058	22.8246	22.7656	22.8959	22.8054	22.8584	22.8394	22.5422	21.6831	22.9778	23.0981	22.987	22.9445	22.9715	22.9379	23.0863	22.2014	23.0858
P15169	CPN1	Carboxypeptidase N catalytic chain	21.6436	21.8925	21.4564	21.5146	21.8293	22.1167	22.0232	21.475	21.765	22.1168	21.8155	22.1344	22.0808	21.6571	21.711	21.7565	21.5036	21.2207	21.5788	21.4442	21.8069	21.5247	21.4072	21.8937	22.6459	22.744	22.1198	22.4509	22.5839	22.7907	22.207	22.4159	22.4371	22.2973	22.5478	22.6804	22.2084	22.4237	22.1892	22.5242	22.0545	22.2806	22.361	22.2974	22.2462	22.338	22.3177
P15531	NME1	Nucleoside diphosphate kinase A	23.6181	24.1499	23.5921	23.6971	23.8787	23.8461	23.642	23.6975	23.6747	24.3053	23.4326	23.4252	23.7424	23.8849	24.1809	23.0679	23.3962	23.6392	23.9825	23.2137	23.3104	22.8484	23.0798	23.3623	23.5553	23.5438	24.681	24.0579	23.7533	23.3198	22.4925	23.5265	23.4846	23.0946	23.5132	23.378	23.0471	22.6489	22.6807	22.7171	23.0704	22.7509	23.6722	22.8786	23.1401	23.1892	22.764
P15814	IGLL1	Immunoglobulin lambda-like polypeptide 1	25.2077	25.1497	25.2157	25.2961	25.2338	25.31	25.169	25.2837	25.2777	25.3251	25.1878	25.2736	24.912	24.8677	24.8809	25.0584	24.9663	24.9117	25.0204	24.9283	25.0071	24.9786	24.971	24.8951	24.7709	24.622	24.769	24.8682	24.8883	24.8625	24.9356	24.93	24.9665	24.9236	24.9502	24.9512	23.9257	24.135	24.6999	24.4761	24.379	24.2237	24.4647	24.4322	24.5608	24.5694	24.5501
P16070	CD44	CD44 antigen	20.1873	19.9966	19.9913	19.6475	20.0882	19.8742	20.0768	20.1194	20.1187	19.9771	19.97	19.9234	20.4078	20.3624	19.9481	20.3057	20.1194	20.1658	20.2386	20.476	20.0608	20.1291	20.4473	20.2667	19.8635	19.7816	19.3033	19.5512	19.7689	19.638	19.9522	20.0201	19.5531	19.9542	19.467	19.7797	19.5594	19.5327	19.6166	19.617	19.542	19.5899	19.6004	19.3373	19.6854	19.6301	19.3621
P16930	FAH	Fumarylacetoacetase	25.6822	25.8556	25.6051	26.049	25.7261	25.6032	25.8587	25.4154	25.946	25.5066	25.6264	25.8596	25.5241	25.1714	25.8042	25.486	25.5218	25.378	25.7537	25.8177	25.5084	25.5021	25.6471	25.427	25.2995	25.6787	25.4959	25.2655	25.2675	25.2297	25.4572	25.771	25.4591	25.5552	25.2754	25.4748	25.3794	25.3464	25.794	25.6998	25.6606	25.5403	25.9247	25.2777	25.2846	25.7817	25.4092
P17174	GOT1	Aspartate aminotransferase, cytoplasmic	27.146	27.0659	27.0674	27.4452	27.4097	27.4279	27.2302	27.1264	26.5692	27.2595	26.8009	27.1942	26.9494	26.6748	26.4853	27.0711	27.0706	27.3106	27.0628	27.1693	27.2115	27.2528	27.19	27.1795	27.0269	26.556	27.0416	26.5561	27.0567	26.9617	26.9789	26.9421	26.6339	26.4073	26.7504	26.2866	26.7258	26.5399	26.8736	26.5052	26.9021	26.5474	26.1682	26.7734	26.7382	26.5371	26.453
P17813	ENG	Endoglin	21.6894	21.8841	22.0527	21.6554	21.7347	21.8703	22.1349	22.0216	21.947	21.0647	21.7967	22.0874	21.8144	22.0812	22.2142	22.1213	22.213	22.1674	21.7005	22.1854	22.1173	21.9829	22.1179	21.693	21.7961	21.9925	22.2067	22.0692	22.2229	22.0786	22.19	22.1437	22.1419	22.0233	22.1796	22.3439	21.9121	22.324	21.9023	22.3097	22.3541	22.3238	21.9371	21.5736	22.3496	22.2316	22.2807
P17900	GM2A	Ganglioside GM2 activator	21.5622	21.3749	21.2397	21.2017	21.3094	21.2157	19.3296	21.3645	21.3403	21.3276	21.4952	21.3135	21.662	21.4854	21.6444	21.8246	21.3675	21.6913	21.2297	20.6107	21.2711	21.3125	19.0857	21.797	21.8534	21.445	21.5002	21.1363	21.4785	21.6194	21.5035	20.9007	21.4163	21.2875	21.4174	21.5108	22.0133	21.8471	21.9789	21.9453	21.9403	21.7446	22.2684	22.088	21.5508	22.4238	22.6599
P17936	IGFBP3	Insulin-like growth factor-binding protein 3	23.7439	23.505	24.024	23.3226	23.3943	23.3523	23.5905	23.4516	23.778	23.8787	23.5014	23.8061	23.9837	24.0538	23.6346	23.934	23.8521	23.9089	23.8652	23.8896	24.0749	24.1366	23.9415	23.9783	23.6903	23.683	23.0011	23.7629	23.2523	23.5238	23.5468	23.7386	23.662	23.8368	23.471	23.2774	24.5098	24.039	23.9476	23.5442	24.1033	23.791	23.7153	24.411	23.9773	23.9563	23.7711
P18065	IGFBP2	Insulin-like growth factor-binding protein 2	21.5172	21.4541	22.0917	22.0993	21.9189	22.2445	21.9877	22.1128	22.1038	21.8492	21.509	21.3833	21.6288	20.9849	22.1617	21.6263	21.8176	21.9072	22.035	21.4134	21.6139	21.7729	21.5578	21.6946	21.8278	22.1561	21.7636	21.739	21.6066	21.787	21.5642	21.8512	21.5436	21.5753	21.5832	21.6265	21.993	21.5133	20.2709	21.0359	21.5884	21.194	21.6947	21.0916	21.1953	21.3954	21.5768
P18206	VCL	Vinculin	26.5812	26.561	26.6561	26.7217	26.6811	26.6005	26.4918	26.6238	26.5621	26.5985	26.6416	26.5887	26.5253	26.5607	26.5809	26.597	26.5073	26.5194	26.5039	26.4977	26.6548	26.5729	26.6061	26.4683	26.5125	26.6378	26.4431	26.493	26.6106	26.5154	26.394	26.511	26.5408	26.4978	26.4191	26.4507	26.3215	26.4797	26.5444	26.5645	26.3882	26.4273	26.3241	26.3092	26.473	26.4673	26.3261
P18428	LBP	Lipopolysaccharide-binding protein	27.1651	26.8082	26.6701	26.8857	26.9672	27.5633	26.7617	26.8166	26.7271	26.6974	26.8883	27.1354	27.2642	27.0322	26.8839	26.642	26.8987	27.2177	27.1513	26.9035	26.9652	26.9608	27.0677	27.166	27.2811	27.3948	27.4055	27.4585	27.5841	27.4952	27.211	27.1866	27.0687	27.0443	27.1466	27.2363	26.9141	26.8655	26.8677	27.1195	27.1521	27.6347	26.8214	26.9344	27.0626	26.9107	26.9307
P18669	PGAM1	Phosphoglycerate mutase 1	25.0125	25.1939	25.1399	25.122	24.8795	25.0129	24.8023	24.758	24.8107	24.9037	24.6486	24.7208	24.7743	24.8028	25.0262	24.4492	24.5523	24.782	24.6696	24.4819	24.654	24.4587	24.605	24.5163	24.955	25.0313	25.293	24.9979	24.802	25.0423	24.7514	24.6029	24.7026	24.3628	24.7837	24.8836	24.7004	24.7859	24.5239	24.8151	24.7409	24.7713	25.0662	24.7506	24.7342	24.8433	24.5642
P19021	PAM	Peptidyl-glycine alpha-amidating monooxygenase	21.3537	21.1678	20.8436	20.6977	20.9582	21.4234	20.646	21.9247	21.3948	21.4184	21.0051	20.7062	21.4801	20.7747	20.5326	21.0122	20.6385	21.2667	20.514	20.649	20.7016	20.7118	21.3696	20.7739	21.6455	21.144	21.5702	21.5488	21.4229	21.6381	21.4616	21.6314	21.539	21.3744	21.6947	21.6754	21.7193	21.6556	21.5473	21.2691	20.9735	21.4499	20.8266	21.3051	21.379	21.3616	21.3941
P19320	VCAM1	Vascular cell adhesion protein 1	29.1786	29.2414	29.4414	29.0701	29.2849	29.4094	28.8948	29.0181	29.0821	29.2145	29.1099	29.1002	29.2244	29.266	29.1615	29.0789	29.1347	29.1702	28.9994	29.2159	29.1208	29.1806	29.0141	29.1773	29.111	28.8809	29.0206	29.0601	29.1273	29.0381	28.9799	29.0496	28.9187	29.0127	29.066	28.9714	29.199	28.8949	29.3756	29.3291	29.2634	29.3396	29.1405	29.1067	29.0296	29.2086	29.2029
P19652	ORM2	Alpha-1-acid glycoprotein 2	25.189	25.1191	25.2505	25.2258	25.1328	25.1313	25.2123	25.0705	25.1618	25.1251	25.1654	25.1895	25.6913	25.5981	25.4738	25.535	25.6559	25.5112	25.4394	25.447	25.5941	25.4758	25.5216	25.4548	25.6273	25.6726	25.6932	25.5864	25.6548	25.6203	25.6787	25.6679	25.6088	25.5143	25.5893	25.5433	24.8285	25.0441	25.3248	25.3342	25.2149	25.4733	25.1924	25.158	25.3738	25.3221	25.2127
P19823	ITIH2	Inter-alpha-trypsin inhibitor heavy chain H2	25.5438	25.4746	25.5126	25.5003	25.4813	25.4892	25.5039	25.5351	25.5708	25.5546	25.4842	25.5707	25.6191	25.7621	25.6386	25.6501	25.6723	25.684	25.4716	25.6724	25.6419	25.6706	25.6469	25.7074	25.7746	25.6594	25.4734	25.5788	25.6603	25.5889	25.8233	25.8465	25.8022	25.8084	25.8394	25.8282	25.8036	25.8166	25.9396	25.8862	25.8301	25.8204	25.7571	25.8415	25.8972	25.9285	25.8498
P19827	ITIH1	Inter-alpha-trypsin inhibitor heavy chain H1	28.4485	28.383	28.3833	28.3529	28.3557	28.4571	28.4732	28.4897	28.4361	28.4542	28.4369	28.4478	28.6789	28.7142	28.6213	28.6827	28.673	28.6468	28.5299	28.6636	28.6801	28.6125	28.6504	28.6785	28.757	28.6325	28.4926	28.5946	28.6873	28.6624	28.7614	28.778	28.7827	28.7845	28.8399	28.8113	28.8569	28.8172	28.871	28.8407	28.787	28.8337	28.7508	28.8153	28.8238	28.8645	28.8125
P20742	PZP	Pregnancy zone protein	27.3182	27.3309	27.3806	27.3979	27.3053	27.4168	27.4097	27.4147	27.3313	27.3212	27.3112	27.2687	27.3371	27.2326	27.2815	27.0713	27.2471	27.3851	27.2587	27.1135	27.3275	27.3063	27.3041	27.2174	27.3424	27.319	27.1986	27.2484	27.2056	27.1133	27.1197	27.0475	27.0322	27.0546	27.1306	27.1673	26.7614	26.8362	26.8754	26.7021	26.7083	26.945	26.9645	26.9541	26.9827	27.0075	27.1386
P20851	C4BPB	C4b-binding protein beta chain	26.7003	26.5843	26.63	26.6526	26.7346	26.6968	26.5236	26.4697	26.6016	26.5437	26.6495	26.6059	26.786	26.7966	27.1281	26.5378	26.476	26.8736	27.1012	26.5569	26.529	26.4402	26.535	26.5593	26.8833	26.8414	27.4689	26.8904	26.71	27.4336	26.9067	26.8558	26.8644	26.9336	26.9313	26.8587	26.7295	26.9758	26.833	26.8337	26.745	26.7694	27.5438	26.7456	26.8267	26.8631	26.7953
P21333	FLNA	Filamin-A	27.0143	27.0511	27.0135	27.076	27.0928	26.9938	26.9559	26.9892	27.0777	27.0078	27.0597	27.0871	26.8906	26.8527	26.8234	26.922	26.9301	26.9075	26.8196	26.8442	26.9029	26.8875	26.8011	26.849	26.8808	26.752	26.7887	26.8276	26.8984	26.7683	26.7541	26.769	26.8877	26.8983	26.8057	26.7519	26.7989	26.7783	27.0432	27.0838	26.8962	26.9235	26.8002	26.9749	27.0086	27.0182	27.0157
P22105	TNXB	Tenascin-X	26.5202	26.59	26.6361	26.5899	26.593	26.7646	26.5616	26.5791	26.5796	26.4792	26.4516	26.54	26.6957	26.7806	26.4571	26.7035	26.6739	26.6108	26.6866	26.7156	26.6882	26.6179	26.747	26.7049	26.53	26.703	26.4726	26.5986	26.4765	26.4192	26.4716	26.6179	26.6135	26.4141	26.5083	26.5276	26.3077	26.4984	26.6842	26.5052	26.555	26.2827	26.3539	26.3127	26.5027	26.4021	26.4125
P22352	GPX3	Glutathione peroxidase 3	21.213	21.352	21.3365	21.2515	21.2659	21.3121	21.2354	21.2008	21.0367	21.1502	21.1491	21.1741	21.0922	20.8444	20.78	20.7953	20.8734	20.8206	20.8068	20.6108	20.6705	20.7898	20.7429	20.7085	20.9895	20.9725	20.9818	20.9586	21.1292	20.889	20.9336	20.8337	20.9222	20.9085	20.948	20.8191	21.3063	21.1044	20.9213	21.042	21.0734	20.8959	20.8092	20.9466	21.1243	20.9662	21.1025
P22692	IGFBP4	Insulin-like growth factor-binding protein 4	23.2651	22.0968	21.7119	21.8499	21.7148	21.6847	21.5021	21.4357	21.501	21.556	21.0575	21.3	21.4529	21.3931	21.8588	20.9805	21.3725	21.6961	21.8222	21.2964	21.5944	21.5214	21.3451	21.4188	21.6169	21.6756	21.6751	21.403	21.4463	21.7205	21.406	21.7122	21.4337	21.0877	21.2945	21.1872	21.2461	21.3625	21.2922	21.7589	21.1282	21.1904	21.503	20.9088	20.8589	21.3044	21.7019
P22792	CPN2	Carboxypeptidase N subunit 2	27.0652	26.9756	26.9846	26.9965	26.8245	26.9651	26.8105	26.8573	26.7827	26.7737	26.8074	26.8085	27.2982	27.2153	27.0895	27.0138	27.1262	26.9949	26.9535	27.0116	27.0349	26.9304	26.9802	26.9655	27.6789	27.7527	27.6504	27.6295	27.6466	27.5832	27.5792	27.5242	27.4948	27.455	27.5651	27.5483	27.4444	27.4126	27.3684	27.4052	27.3889	27.4456	27.3434	27.5153	27.4567	27.4216	27.4906
P22891	PROZ	Vitamin K-dependent protein Z	25.329	24.6187	24.7056	24.6544	25.3325	25.4444	25.1761	25.4077	25.4248	25.0463	25.1427	25.4716	25.7169	25.5521	25.569	25.6663	25.6838	25.5642	25.3438	25.5518	25.6736	25.7593	25.7211	25.6363	25.6154	25.1288	25.2111	25.2436	25.3349	25.2502	25.377	25.2531	25.4206	25.5208	25.3107	25.4579	25.68	25.4512	25.7076	25.6532	25.3126	25.3708	25.3235	25.5839	25.5294	25.4932	25.4354
P22897	MRC1	Macrophage mannose receptor 1	20.783	20.5921	21.0039	20.6088	20.9184	20.9152	20.4843	20.868	21.0932	20.7623	21.0132	21.0561	20.9662	21.2253	21.1459	21.4914	21.0452	21.3692	21.0941	20.7525	21.0852	21.3117	20.8932	21.1599	21.0355	20.7508	20.2588	20.7041	20.9715	20.9544	20.8629	20.7297	21.0225	21.0311	20.986	21.0178	20.3579	20.5528	20.7706	20.9199	20.3348	20.6558	20.7096	20.5514	20.7469	20.7395	20.7335
P23083	IGHV1-2	Immunoglobulin heavy variable 1-2	24.4648	24.3778	24.1879	24.3476	24.1055	24.2335	24.1734	24.1825	24.1367	24.1174	24.21	24.0672	23.4581	23.6798	23.6571	23.5308	23.7422	23.9671	23.7086	23.3072	23.7171	23.4897	23.8446	23.3167	24.2663	24.2633	24.2496	24.1456	24.2023	24.2279	24.152	24.1144	24.0849	24.0608	24.1621	24.1152	23.658	24.0237	23.9082	24.061	23.949	23.9384	24.0818	24.1173	24.1479	24.0823	24.2134
P23142	FBLN1	Fibulin-1	22.4014	22.3446	22.2912	22.4507	22.3093	22.3734	22.3976	22.4115	22.356	22.4005	22.415	22.2391	21.9035	22.1105	22.0094	22.0986	22.0741	22.0459	22.1073	22.0911	22.1615	22.1123	22.0848	22.0209	22.0411	22.1222	22.2611	22.232	22.197	22.1463	22.1326	22.0499	22.0933	22.0623	22.1417	22.132	22.4795	22.5353	22.5791	22.5888	22.6102	22.5448	22.6523	22.5942	22.5348	22.5301	22.5437
P23284	PPIB	Peptidyl-prolyl cis-trans isomerase B	23.1743	23.3475	23.1601	23.4776	23.407	23.0773	23.1734	23.1399	23.4982	23.0807	23.1605	23.2322	23.1486	22.7551	23.2913	23.1587	23.1389	23.2717	23.6159	23.0843	23.425	23.2723	23.3083	23.1202	22.8039	22.7042	22.9319	23.1674	23.1496	22.0871	22.7691	22.3407	23.0533	22.9236	22.9105	22.3442	21.4566	21.6947	22.2163	23.2172	21.8923	22.2303	21.9778	22.2097	23.5862	22.809	22.388
P23528	CFL1	Cofilin-1	23.6781	23.7282	23.7831	23.632	23.4524	23.551	23.0277	23.4216	23.1983	23.4547	22.5255	22.7771	23.0074	23.1671	23.129	23.1829	22.8694	23.193	23.1623	23.3265	23.1754	23.3452	23.242	23.1598	23.4977	22.5973	23.632	23.6629	23.1819	23.1369	22.8994	23.2379	23.1719	23.377	23.3499	23.3408	24.0337	22.9639	23.0983	23.1741	23.805	22.7301	23.6651	24.3066	23.597	23.531	22.9379
P24821	TNC	Tenascin	26.3727	26.4052	26.2964	26.2534	26.2389	26.4801	26.2972	26.374	26.355	26.4269	26.3174	26.3139	26.2968	26.1936	26.2681	26.1281	26.0666	26.2085	26.2523	26.2894	26.2088	26.1394	26.2704	26.0753	26.2722	26.3344	26.3345	26.1436	26.3921	26.1758	26.3118	26.3028	26.2849	26.3189	26.2237	26.3113	26.2205	25.8844	26.2363	26.2341	26.2009	26.2615	26.141	26.2124	26.3399	26.2558	26.2338
P25311	AZGP1	Zinc-alpha-2-glycoprotein	22.7385	22.7772	22.784	22.7641	22.7271	22.7626	22.7185	22.7498	22.775	22.7269	22.6895	22.7523	23.2816	23.4893	23.4049	23.499	23.4761	23.5156	23.3062	23.4023	23.4089	23.3788	23.3524	23.4578	22.8769	22.8208	22.8412	22.8381	22.8511	22.9333	22.9088	22.907	22.8848	22.7529	22.8293	22.915	23.9953	23.8543	23.8089	23.828	23.7902	23.8478	23.7587	23.8766	24.022	24.0153	23.8933
P26038	MSN	Moesin	22.9523	22.9701	23.1044	22.7752	22.5041	22.8311	22.9642	22.9302	22.9362	22.8167	23.1665	22.8236	22.6519	22.8271	23.0131	22.8893	22.7615	22.9282	22.9432	22.8726	23.0531	22.7997	22.7251	22.6463	22.7424	22.5169	22.6269	22.8484	22.6746	22.6144	22.6113	22.8094	22.7141	22.6237	22.5353	22.5391	22.3705	22.2816	22.5731	22.604	22.2787	22.6509	22.4938	22.5862	22.8152	22.7285	22.7358
P26927	MST1	Hepatocyte growth factor-like protein	27.722	27.8848	27.7751	27.5682	27.7711	27.8681	27.6372	27.6057	27.2608	27.6776	27.5754	27.6004	27.7261	27.9754	28.2315	27.7184	27.689	28.199	28.3123	27.8456	27.6843	27.3539	27.41	27.7371	27.7843	27.5947	28.6568	28.1715	27.8648	28.2643	27.8755	27.7355	27.7821	27.8922	27.8761	27.5755	27.2385	27.3343	27.1118	27.1741	26.8969	26.4684	27.7916	27.2989	27.0172	26.929	26.7016
P27169	PON1	Serum paraoxonase/arylesterase 1	25.1625	25.0723	25.1457	25.1724	25.1743	25.1504	25.1756	25.1904	25.2092	25.2207	25.226	25.1712	24.8388	24.9429	24.7566	24.8781	24.8707	24.7913	24.6633	24.6639	24.8052	24.8213	24.8431	24.8109	25.7533	25.7277	25.6625	25.6925	25.7549	25.6473	25.724	25.8707	25.7418	25.7147	25.6877	25.7494	25.0244	25.0988	25.3033	25.2767	25.1855	25.1809	25.1122	25.2249	25.2617	25.2722	25.1694
P27487	DPP4	Dipeptidyl peptidase 4	22.6082	22.6151	22.0717	23.0276	23.1567	22.6142	22.7593	22.6227	22.7933	22.768	22.3511	22.4212	23.493	22.7789	22.74	22.6069	22.3676	22.4587	23.1868	22.6975	22.9575	22.6916	22.6632	22.5845	22.2871	22.6557	23.3089	22.6779	22.9911	23.0758	22.5183	22.9646	22.632	22.5877	22.7633	22.7092	23.0123	22.5283	22.6988	22.4131	22.8756	22.484	23.1315	22.8666	22.9586	22.5189	22.7959
P27797	CALR	Calreticulin	23.6838	24.0747	23.6741	24.0776	23.4542	24.0009	23.5665	23.8398	23.8774	23.8747	23.9193	23.7345	23.7294	23.7262	23.7597	23.2709	23.2272	23.5003	24.2965	23.5235	23.5311	23.8007	22.9731	23.5363	23.6021	23.1671	24.0225	24.2804	23.9733	24.0023	23.3514	23.3279	23.5909	23.7938	23.7016	24.005	23.25	23.3244	23.4028	23.4923	24.0633	23.7609	23.455	23.7242	23.0426	23.6803	23.3905
P27918	CFP	Properdin	23.1912	23.0431	23.2371	23.2271	23.2895	23.0768	23.1689	23.0734	23.0868	23.156	23.2046	23.2253	23.3641	23.3111	23.2559	23.4605	23.2734	23.1905	23.177	23.3147	23.1545	23.1347	23.2714	23.0975	23.5285	23.4007	23.5995	23.4932	23.4801	23.5866	23.4826	23.3163	23.3813	23.3615	23.3705	23.549	23.2463	23.2922	23.1846	23.0775	23.1779	22.9529	23.4752	23.3107	23.2863	23.2881	23.2378
P28827	PTPRM	Receptor-type tyrosine-protein phosphatase mu	22.116	21.5765	21.7064	22.3236	22.4539	22.4144	22.1941	21.7364	22.2028	22.3903	21.4102	22.2739	21.6526	22.0055	22.0901	22.0632	22.1986	21.9457	22.0453	20.969	22.1029	21.8277	21.2886	22.0748	21.7856	21.9064	21.8782	21.9798	21.9946	21.8291	21.9607	21.9722	21.8524	21.7496	21.8292	22.1386	22.1101	22.0576	22.0573	22.1874	21.4437	21.4311	22.1566	21.8517	22.7296	22.4389	22.2526
P29401	TKT	Transketolase	23.83	24.0746	23.8934	23.9612	23.8282	23.8535	23.6339	23.9895	23.828	23.8084	23.7403	23.6888	23.5425	23.5888	23.3244	23.4499	23.6555	23.4737	23.5587	23.629	23.7086	23.4112	23.4593	23.2035	23.3952	23.6621	23.4244	23.5099	23.6691	23.2745	23.4387	23.3123	23.4291	23.4426	23.4092	23.3519	23.3166	23.4006	23.6651	23.6044	23.5404	23.5313	23.3446	23.5268	23.4269	23.4564	23.3956
P29508	SERPINB3	Serpin B3	23.311	23.5041	23.57	23.5893	23.5473	23.4867	23.4958	23.6203	23.6849	23.4215	23.598	23.6001	23.5124	23.3007	23.2362	23.2113	23.4353	23.3549	23.1279	23.3207	23.5055	23.331	23.4187	23.3298	23.3258	23.2947	23.2882	23.3154	23.372	23.1919	23.5038	23.3226	23.3261	23.6025	23.4252	23.2983	23.446	23.3106	23.6491	23.5387	23.5578	23.5132	23.2578	23.4823	23.7298	23.5264	23.5264
P29622	SERPINA4	Kallistatin	21.3678	21.5612	21.3729	21.3585	21.2289	21.1567	21.264	21.2165	20.9227	21.2033	21.0791	21.115	21.3655	21.4396	21.4847	21.242	21.4641	21.5013	21.1954	21.4166	21.2792	21.1385	21.2276	21.2505	21.7205	21.6997	21.7887	21.7115	21.6457	21.8244	21.7401	21.5351	21.614	21.4518	21.6533	21.622	21.9985	21.8617	21.6409	21.8558	21.9566	21.8651	21.8117	22.0986	21.8182	21.8764	21.979
P30086	PEBP1	Phosphatidylethanolamine-binding protein 1	20.4693	21.8371	21.7815	21.773	21.8033	21.4262	22.3395	22.1421	21.9025	22.0275	22.1462	22.161	22.3244	22.4835	21.9992	22.2554	22.4714	22.0219	22.2198	21.8018	22.334	22.2894	22.0574	22.4539	22.233	22.6024	22.4835	22.065	22.6499	22.7105	22.92	21.4529	22.7158	22.2371	22.6767	22.8139	20.3084	18.0192	19.1531	19.0307	18.236	20.2651	19.9821	21.3031	20.6274	21.2299	21.3286
P30101	PDIA3	Protein disulfide-isomerase A3	25.5778	25.5413	25.6011	25.7965	25.6308	25.4227	25.5209	25.5006	25.2383	25.4772	25.3282	25.3919	25.5621	25.6149	25.5654	25.5066	25.5115	25.5725	25.6707	25.3509	25.5262	25.5486	25.4845	25.6413	25.6215	25.4171	25.5933	25.5765	25.7366	25.7204	25.643	25.5477	25.7162	25.5834	25.593	25.6451	25.3517	25.2539	25.5992	25.676	25.6129	25.36	25.3844	25.5491	25.5414	25.597	25.6274
P30740	SERPINB1	Leukocyte elastase inhibitor	26.9277	27.0979	27.0066	27.0948	26.8908	27.0254	26.9602	26.9078	26.9467	26.9295	26.9306	26.1067	26.6264	26.9041	26.9958	27.0092	26.9216	26.9421	26.8654	26.8949	26.9414	26.9056	26.9235	26.8386	26.7772	26.5291	26.7948	26.826	26.81	26.6152	26.6802	26.48	26.7248	26.7362	26.762	26.6163	26.3503	26.5238	26.459	26.4884	26.6485	26.6754	26.4858	26.6082	26.6625	26.6934	26.562
P31025	LCN1	Lipocalin-1	23.3738	23.2413	23.2483	23.1617	22.8885	23.0648	23.4806	23.1776	23.0831	23.3984	23.1461	23.226	23.0818	23.171	23.0148	23.0794	23.3303	22.9385	22.9732	23.1357	22.9533	22.9464	22.8686	22.8188	23.3668	23.0016	23.0022	22.9075	23.0684	22.9681	22.9568	22.959	23.0478	22.9766	23.077	23.1168	22.6629	22.6442	22.3013	22.6777	22.0705	22.3258	22.3409	22.3584	22.4268	22.6678	22.3575
P31146	CORO1A	Coronin-1A	22.184	21.8377	21.6578	21.5421	21.5821	21.3732	21.4227	21.2792	21.4405	21.184	21.3986	21.6864	21.6433	21.0699	20.8837	21.3891	21.3769	21.4584	21.5271	21.2189	21.3868	21.2737	21.3823	21.3275	21.6756	21.8226	21.5234	20.9636	21.5899	21.7245	21.389	21.6005	21.7225	21.5092	21.2293	21.5565	19.9493	21.6358	21.2601	21.5351	21.6791	21.5544	21.6202	21.4414	21.8013	21.4911	20.997
P31944	CASP14	Caspase-14	24.8432	24.1049	24.7205	24.8138	24.9783	24.9021	24.5837	24.6153	23.8128	24.3732	25.1576	25.2065	24.2193	24.0821	23.351	23.8169	24.3096	23.0582	23.4777	23.4968	24.1103	24.0482	24.1206	23.7723	24.2572	23.94	23.8534	24.0704	24.2958	23.7575	24.0313	24.2443	24.2153	24.4606	24.3745	24.263	22.8061	23.6515	24.1079	24.108	24.2114	23.8212	22.8661	23.8133	24.2875	23.9206	24.0811
P32004	L1CAM	Neural cell adhesion molecule L1	25.9346	25.8311	26.0739	26.1335	27.1539	24.5806	25.6499	25.8509	26.1263	26.0835	25.8794	25.7403	24.9357	25.5168	25.5106	25.7207	25.333	25.3268	25.275	25.7036	25.8514	25.7249	25.9081	25.4189	25.1896	25.6152	25.0461	25.4269	24.8662	25.6503	25.5811	26.6813	25.7297	25.6769	24.9398	25.627	25.0417	23.4508	25.3784	25.2085	25.423	25.2722	25.3553	25.2006	24.891	24.7441	25.3395
P32119	PRDX2	Peroxiredoxin-2	28.9353	27.7565	27.8983	27.816	27.9468	27.9495	27.7503	27.6459	28.6078	27.6412	27.952	28.6111	27.9767	27.7162	28.0787	28.0994	27.8178	28.0388	28.1496	27.4545	27.887	27.8926	28.0227	27.9319	27.7359	27.7381	27.6809	27.968	28.0117	27.7961	27.7637	27.8975	28.3742	28.0554	27.7986	27.7776	27.6443	27.6959	27.788	27.8229	28.0112	27.6056	27.9666	27.7461	29.4064	27.9293	27.6591
P33151	CDH5	Cadherin-5	22.8818	22.6235	22.9495	22.8674	22.8219	22.9012	22.7512	22.6985	22.6911	22.7792	22.9078	22.4068	22.4015	22.7466	22.4412	22.6749	22.8022	22.8535	22.6209	22.5417	22.5794	22.6245	22.3221	22.21	22.4444	22.4727	22.3752	22.4326	22.8478	22.454	22.5047	22.4596	22.4987	22.5878	22.5594	22.3932	22.4448	22.5221	22.9938	23.0139	22.8265	21.9991	22.3822	22.153	22.4478	22.4925	22.8922
P35527	KRT9	Keratin, type I cytoskeletal 9	27.301	27.4889	27.4709	27.667	27.3838	27.7514	27.6011	27.6063	27.5464	27.5014	27.4754	27.2969	27.5286	27.4646	27.4727	27.5478	27.4662	27.5544	27.42	27.4427	27.4523	27.563	27.5502	27.6025	27.5669	27.3845	27.4498	27.4583	27.4399	27.317	27.3686	27.3393	27.3701	27.4117	27.3565	27.3264	27.2803	27.2157	27.3176	27.4495	27.4159	27.3603	27.4196	27.3264	27.3376	27.2359	27.2174
P35542	SAA4	Serum amyloid A-4 protein	26.3267	26.3616	26.4791	26.5104	26.356	26.3618	26.3375	26.3914	26.3269	26.3716	26.2792	26.3288	26.6807	26.4269	26.3531	26.4776	26.3231	26.2921	26.346	26.2898	26.2913	26.323	26.2834	26.2426	26.4865	26.7778	26.6968	26.7144	26.6921	26.4964	26.7163	26.7838	26.8608	26.6915	26.6286	26.7632	25.5575	25.7934	25.8123	25.8438	25.7555	25.8476	25.5888	25.7469	25.9322	26.0496	25.845
P35555	FBN1	Fibrillin-1	20.231	20.1511	20.099	20.1425	20.1998	20.5488	19.7165	20.0997	19.4119	19.1844	19.6047	19.7592	20.0647	20.3458	20.5909	19.899	20.1969	20.1978	20.4605	19.4143	19.7521	19.2584	19.3118	19.3333	20.2503	20.2032	20.0658	20.2287	19.96	20.1218	19.7623	19.998	19.8271	19.6802	19.9002	19.6684	20.3953	19.8324	20.2889	19.995	20.0306	20.0251	19.8926	20.0525	20.0303	20.2225	19.5386
P35579	MYH9	Myosin-9	26.2591	26.2839	26.2536	26.3222	26.2614	26.2394	26.2253	26.2998	26.2199	26.2666	26.3071	26.2922	26.1305	26.146	26.1345	26.2023	26.1012	26.1688	26.17	26.1929	26.1796	26.2622	26.1302	26.0991	26.0683	26.0611	26.0379	26.0889	26.2253	26.11	26.1957	26.1341	26.2066	26.0337	26.0581	26.1703	26.0347	26.0172	26.1598	26.1095	26.0655	25.9673	26.2473	26.0936	26.2201	26.1447	26.1965
P35858	IGFALS	Insulin-like growth factor-binding protein complex acid labile subunit	23.5902	23.6482	23.6121	23.6388	23.4695	23.6048	23.5172	23.5804	23.338	23.4558	23.4344	23.4635	23.7723	24.0232	23.9836	23.724	23.9008	23.9161	23.7015	23.8401	23.7341	23.7268	23.7002	23.823	23.6721	23.632	23.447	23.3751	23.5215	23.5982	23.5176	23.5872	23.5212	23.4689	23.6516	23.6064	24.0036	23.8856	23.8056	23.9031	23.8993	23.8965	23.7163	24.0242	23.9332	23.921	23.8706
P35908	KRT2	Keratin, type II cytoskeletal 2 epidermal	28.501	28.5413	28.6026	28.6779	28.6987	28.7396	28.6003	28.4888	28.4407	28.5713	28.6167	28.3439	28.3637	28.3952	28.603	28.6034	28.5612	28.6411	28.8384	28.3186	28.6044	28.5016	28.3913	28.4924	28.506	28.3665	29.0617	28.6927	28.5784	28.638	28.5429	28.4633	28.6191	28.556	28.5819	28.383	28.647	28.4645	28.5485	28.5	28.4795	28.4241	28.6572	28.2908	28.3612	28.3324	28.5978
P35916	FLT4	Vascular endothelial growth factor receptor 3	24.2844	24.2529	24.3725	24.3646	24.0813	24.4009	24.4296	24.1432	24.2811	24.2624	24.3572	24.1762	24.1283	24.0198	23.4472	23.9099	23.9555	24.0329	24.119	23.9628	23.8622	23.9604	23.2975	24.0409	24.1469	24.371	24.0309	24.0264	24.0774	23.6486	23.9599	23.9874	24.0985	24.1088	23.9591	24.1158	23.7873	23.7688	24.0331	23.7779	23.8929	24.5313	23.9014	23.7002	23.9483	24.1011	23.9799
P36955	SERPINF1	Pigment epithelium-derived factor	23.5117	23.4077	23.3967	23.3176	23.3134	23.5549	23.3691	23.4503	23.3419	23.347	23.3791	23.5087	23.8338	24.0278	23.7856	23.9002	24.092	23.9516	23.7273	23.9398	24.0129	23.9145	23.921	23.9321	23.8453	23.8506	23.9512	24.044	24.0051	23.9202	23.9659	23.9364	23.9208	23.9084	23.96	23.9264	23.9999	23.8848	23.9628	23.9767	23.9629	23.9872	23.9045	23.8998	23.889	24.0457	23.953
P36980	CFHR2	Complement factor H-related protein 2	22.3614	22.2493	22.2016	22.2426	22.2378	22.1725	22.0299	22.1852	22.2178	22.0256	22.2563	22.0029	23.1624	23.2221	23.1599	23.2481	22.8204	23.2512	23.3129	23.2323	23.1288	23.1342	23.1891	23.1979	22.0129	21.6598	22.0159	21.9985	21.9476	22.1446	22.0284	21.9382	21.7605	21.9878	21.936	22.0052	22.5505	22.3751	22.2918	22.3784	22.2853	22.3628	22.5568	22.412	22.4713	22.4512	22.4431
P37802	TAGLN2	Transgelin-2	23.5676	23.5822	23.2466	23.6024	23.6318	23.5348	23.8214	23.4917	23.3917	23.4729	23.2036	23.3363	23.676	23.6475	23.6226	23.3718	23.509	23.9707	23.3793	23.3605	23.5484	22.2753	23.7682	23.4209	23.8768	23.7952	23.9985	23.6079	23.9199	23.8994	23.5714	23.3532	23.401	23.4235	23.8354	22.7633	23.1858	24.3049	21.8415	22.8123	23.7311	23.3565	22.7682	23.6117	24.0701	23.8506	22.8817
P39060	COL18A1	Collagen alpha-1(XVIII) chain	24.7542	24.5926	24.7134	24.4217	24.5779	24.8899	24.5215	24.8538	24.8545	24.8333	24.511	24.7736	23.9892	24.6172	24.9989	25.158	24.083	24.7994	24.0604	24.2154	24.3735	24.6117	24.209	23.945	24.3983	23.9719	24.434	24.283	24.2093	23.8237	25.7121	25.3155	24.6622	24.3946	24.9956	23.9596	24.4618	24.1645	24.1835	24.1156	24.4794	24.5765	24.5653	24.6867	24.5035	23.657	24.5866
P40197	GP5	Platelet glycoprotein V	27.2808	26.3971	26.1625	26.6533	26.5476	25.6709	26.6696	26.4132	26.0971	26.5926	26.4343	26.3449	26.1361	26.752	26.7572	26.4719	26.6398	26.6582	26.1316	26.606	26.5642	26.7061	25.5679	26.6624	27.2704	26.6938	25.7839	25.3512	25.9766	25.2942	26.5144	26.3352	26.4005	26.0838	26.3458	26.1259	25.8568	25.8311	26.5203	26.1893	25.8301	26.631	25.9131	26.6098	26.22	26.084	25.4753
P40925	MDH1	Malate dehydrogenase, cytoplasmic	24.6007	24.61	24.6192	24.7826	24.5783	24.6927	24.5233	24.6471	24.7826	24.7177	24.6658	24.7023	24.2942	24.5774	24.7131	24.1064	24.1806	24.6556	24.7883	24.3899	24.4279	24.4176	24.4296	24.4339	24.4626	24.4494	25.2302	24.6438	24.7554	24.8334	24.1783	24.3198	24.7328	24.3643	24.4328	24.4319	24.1905	24.2091	24.0909	24.3189	22.5544	24.5671	24.6081	24.2759	24.1914	24.1654	24.1249
P41222	PTGDS	Prostaglandin-H2 D-isomerase	18.1562	18.0941	18.2457	18.1406	17.988	18.2686	18.1309	17.9567	18.0158	17.9927	17.9344	18.148	17.8321	17.7344	17.7516	17.7799	17.6774	17.9084	17.6068	17.9446	17.8407	17.9107	17.9162	17.9657	17.9001	16.5825	17.9116	17.7561	17.6242	17.82	17.9074	17.6089	17.8693	17.7969	17.8991	18.075	18.5824	18.2097	18.6379	18.6915	18.4417	18.4811	18.4916	18.5935	18.7781	18.722	18.5813
P43121	MCAM	Cell surface glycoprotein MUC18	22.8762	22.9063	22.8701	22.8931	22.7534	22.7074	22.8515	22.7712	22.6789	23.0431	22.6365	22.6849	22.587	22.1619	22.1622	22.3863	22.1097	21.8752	22.4917	22.5686	22.603	21.7136	22.6319	22.4756	22.5908	22.6896	22.4323	22.8516	22.7093	22.5096	22.616	22.566	22.4651	22.1549	22.6773	22.4694	22.408	22.3384	22.6707	22.9513	23.2367	22.1814	22.235	23.6615	22.122	22.7466	22.9867
P43251	BTD	Biotinidase	19.6025	19.511	19.6224	19.6142	19.3397	19.4844	19.7457	19.6125	19.8187	19.4928	19.5658	19.5634	19.607	19.6528	19.4666	19.7867	19.999	19.7847	19.5986	19.6741	19.5033	19.6605	19.7005	19.7478	19.6452	19.8398	19.7344	19.8176	19.7777	19.9421	19.9651	19.7666	19.6258	19.8309	19.7125	19.742	19.9777	19.6089	19.8411	19.8371	19.9467	19.9273	19.7746	19.9334	19.8286	19.8136	19.9032
P43652	AFM	Afamin	27.6406	27.519	27.5576	27.5543	27.474	27.4666	27.527	27.5796	27.5068	27.5795	27.5409	27.5143	27.7594	27.8155	27.7833	27.7703	27.7304	27.7837	27.6269	27.7208	27.7168	27.7158	27.7253	27.7125	27.6105	27.6005	27.5558	27.5427	27.7346	27.605	27.5667	27.5863	27.6054	27.6258	27.6482	27.6391	28.0747	27.8689	27.8401	27.9186	27.8881	27.8364	27.8165	27.9591	27.9371	27.9335	27.9331
P48637	GSS	Glutathione synthetase	27.0022	26.8539	26.9096	27.1451	27.0374	26.9745	27.0739	27.004	27.4204	28.5279	27.1409	28.1327	26.8695	27.003	26.8382	27.1796	27.278	27.0839	27.8062	27.3054	27.4365	28.249	26.9378	26.9724	27.4266	27.0189	26.7839	27.4592	27.1015	26.6404	26.9308	26.8744	26.7864	26.894	26.9884	26.7022	26.8885	27.164	26.9615	26.9929	27.014	26.9931	26.9232	26.8731	27.0737	27.0179	26.9464
P48740	MASP1	Mannan-binding lectin serine protease 1	25.2055	25.0513	25.1981	25.3027	25.3858	25.0973	25.2042	25.3016	25.183	25.0634	25.0005	25.1093	25.3675	25.2226	25.3365	25.2151	25.0668	25.312	25.2275	25.114	25.0916	24.9177	25.1778	25.0716	25.1646	24.9554	25.14	25.2457	25.3413	25.2214	25.0565	25.0606	25.2717	25.1133	25.0916	25.127	25.022	24.9963	25.0473	25.0399	25.2219	25.1068	25.0272	25.2022	24.8745	24.9435	25.1897
P49747	COMP	Cartilage oligomeric matrix protein	26.2005	26.2147	26.2258	26.2126	26.3801	26.7216	25.9935	26.2374	26.2377	26.3766	26.3111	26.2622	25.9532	26.1148	25.7395	26.1084	26.0397	26.3071	26.1763	26.0764	26.1705	26.3559	26.0729	26.0527	26.0171	25.8819	25.9513	26.0057	26.0054	25.7009	25.8421	26.1991	25.9778	25.7597	26.0321	26.0524	26.242	26.2469	26.5552	26.3742	26.1375	26.0051	26.0429	25.8708	26.2222	26.3472	26.1345
P49908	SELENOP	Selenoprotein P	24.5882	24.6167	24.6368	24.5908	24.491	24.5738	24.505	24.4534	24.1951	24.4458	24.4715	24.3393	24.5495	24.689	24.6295	24.4976	24.6159	24.6648	24.4131	24.322	24.3552	24.3476	24.4302	24.3488	24.4698	24.4698	24.4703	24.1632	24.4547	24.3747	24.3659	24.4197	24.245	24.3664	24.2455	24.342	24.6852	24.6283	24.7034	24.558	24.6249	24.7331	24.6248	24.8154	24.684	24.7817	24.7471
P51153	RAB10	Ras-related protein Rab-13	20.2169	22.2468	21.7954	22.0202	21.953	19.8864	21.8554	21.7522	21.4499	21.5672	21.8886	21.8477	21.2133	21.965	21.8989	21.6202	21.9587	22.1197	20.7378	21.8771	21.7662	21.8084	20.4995	21.8496	20.0136	22.4995	21.9901	21.9942	22.1774	22.043	21.7628	20.3641	20.7618	19.7879	22.0518	22.0587	21.7906	19.3322	20.8629	22.0108	22.0793	20.837	19.5577	21.7544	19.4802	21.7198	19.9972
P51884	LUM	Lumican	28.8912	28.7884	28.9383	28.8723	28.8426	28.8942	28.7291	28.8809	28.8363	28.8263	28.7996	28.708	28.3971	28.5966	28.5107	28.6485	28.5625	28.5575	28.5204	28.7374	28.6269	28.5907	28.5887	28.5146	28.7257	28.7503	28.8415	28.908	28.866	28.6992	28.7089	28.5563	28.7207	28.7242	28.6761	28.6156	28.7273	28.5972	28.6259	28.6564	28.6613	28.6465	28.6454	28.6199	28.5621	28.5901	28.5797
P52907	CAPZA1	F-actin-capping protein subunit alpha-1	19.8563	20.0015	20.0007	19.923	19.8348	19.9972	19.8928	19.7032	19.7219	19.8833	19.8239	19.7219	20.0849	20.1039	20.1058	20.2185	20.0568	20.0401	20.0308	20.1861	19.9333	20.0238	20.0029	20.0422	20.1404	20.3021	20.0373	20.1328	20.0547	20.0619	20.1994	20.3308	20.1602	20.3326	20.1963	20.1956	19.9063	19.7292	19.6711	19.6318	19.823	19.8223	19.6836	19.7478	19.784	19.8033	19.8651
P54108	CRISP3	Cysteine-rich secretory protein 3	16.8815	17.0473	16.5559	16.9243	16.7653	16.6377	17.1062	17.1751	17.0472	16.9919	17.2191	17.0845	16.2629	16.6054	16.6684	16.7027	16.8685	16.8382	16.3171	16.1012	15.9645	16.3255	16.9879	16.2103	16.2567	16.283	16.3927	16.2357	16.0956	16.1024	16.2247	15.8427	15.8207	15.8527	15.9767	16.2019	16.5135	16.1958	16.6154	16.2232	16.6579	16.3358	16.4604	16.3126	16.7424	16.3279	16.1023
P54289	CACNA2D1	Voltage-dependent calcium channel subunit alpha-2/delta-1	23.1649	23.1258	23.1179	23.3963	23.3417	24.061	23.0534	23.1499	23.3697	23.2249	22.9764	23.1975	22.7904	22.8336	22.6358	22.8685	22.6085	22.759	22.6707	22.2604	22.5804	22.6632	22.5231	22.839	22.8853	22.595	23.3365	23.164	22.7719	23.1805	22.9797	22.7855	22.808	23.1085	22.9977	22.8768	22.8104	22.836	22.8154	23.0867	22.3825	23.2863	23.0722	22.8405	23.2215	23.1396	22.7763
P55056	APOC4	Apolipoprotein C-IV	23.4963	23.0195	22.7841	22.3813	22.0279	22.2451	22.3203	22.3365	22.2984	22.2966	22.1004	22.2165	22.683	22.8081	22.8765	22.0689	22.236	22.3991	22.3905	22.3131	22.2621	22.1096	22.0565	22.0014	22.8406	22.3265	22.4522	22.1237	21.8326	20.8471	22.2617	22.1706	22.3334	22.2998	20.8181	22.026	21.8804	21.6264	22.2045	22.3945	21.7333	22.2413	21.6812	22.101	22.515	22.4708	21.7206
P55058	PLTP	Phospholipid transfer protein	24.5306	24.2526	24.1711	24.377	24.1202	24.177	24.271	24.1555	23.968	23.9366	24.097	24.0529	24.1946	24.3827	24.0775	24.0672	24.3075	24.1752	24.0402	24.3282	24.2591	24.0438	24.0774	24.0413	24.4257	24.4983	24.0864	24.1278	24.2445	24.1382	24.0171	24.1039	24.1956	24.219	24.5263	24.1969	24.6013	24.4958	24.2066	24.3631	24.4547	24.3461	24.234	24.4212	24.2203	24.2429	24.4281
P55072	VCP	Transitional endoplasmic reticulum ATPase	23.0393	22.9646	22.8603	23.1126	22.7896	22.9172	22.5704	22.6891	22.7703	22.8866	22.8082	22.9622	23.1255	23.0202	22.9861	22.9189	22.9903	23.1286	23.1886	22.73	23.056	22.7431	22.9194	22.8265	23.156	22.9778	23.2129	23.2545	23.3949	23.1019	23.1633	22.9825	23.0444	23.2626	23.1305	23.1122	22.9024	22.4967	23.0358	23.1717	23.1272	22.6299	22.7587	23.113	23.2338	23.1279	22.8466
P55285	CDH6	Cadherin-6	23.7514	23.9614	23.6414	23.9546	22.271	23.8615	23.5358	23.5141	23.3169	23.6818	23.2297	23.4599	23.346	23.6076	24.2562	23.4371	23.5394	23.9751	23.9467	23.2525	23.4725	23.1861	23.5581	23.35	23.8222	22.5293	24.5584	24.0606	23.8692	23.9088	23.0957	23.0675	23.7104	23.2411	22.6673	23.714	23.8389	23.4146	23.4144	22.6758	23.0645	23.4007	22.9704	23.0433	23.3334	23.1422	22.7385
P55290	CDH13	Cadherin-13	26.9885	26.8206	27.0329	26.9015	26.753	26.6644	26.6259	26.6902	26.7585	26.7296	26.7053	26.5991	26.786	26.6904	26.3624	26.5586	26.5273	26.5184	26.4379	26.6238	26.5504	26.6495	26.5505	26.4434	26.5773	26.6357	26.5163	26.4621	26.5437	26.4782	26.364	26.2304	26.2809	26.3788	26.3693	26.3827	25.9913	26.0923	25.8894	26.1825	26.328	26.0073	25.9208	25.8003	25.7751	25.9988	26.0137
P60174	TPI1	Triosephosphate isomerase	28.6918	28.6748	28.6412	28.6465	28.7671	28.7953	28.7872	28.7501	28.7409	28.7722	28.6851	28.6971	28.5041	28.6022	28.58	28.6085	28.6311	28.6785	28.4964	28.5707	28.7176	28.8363	28.6127	28.8947	28.6956	28.2188	28.6128	28.7848	28.7813	28.5784	28.9063	28.8157	28.8295	28.7776	28.7207	28.7402	28.6234	28.4456	28.8238	28.5109	28.4469	28.5905	28.0754	28.5935	28.7269	28.6236	28.5779
P60709	ACTB	Actin, cytoplasmic 1	25.683	24.7122	24.4003	25.1672	25.3789	24.975	24.2372	24.9021	25.1077	24.9701	24.4924	24.681	24.6217	24.9879	25.0852	24.2751	24.5233	25.0486	26.1214	25.3567	25.2952	25.4382	25.5712	25.7415	25.0608	25.0779	25.266	25.2319	25.3691	24.9536	25.2076	26.0639	25.3641	25.3042	25.079	25.0677	25.0863	25.6827	25.5754	25.2384	24.8639	26.5364	25.9557	24.9326	25.4141	25.1482	25.6314
P61158	ACTR3	Actin-related protein 3	23.0661	23.4035	23.2604	22.8377	22.8118	22.4693	22.9914	22.8611	22.4822	22.9287	23.0605	23.0877	22.7918	23.2585	23.0407	22.2052	22.8776	23.325	23.4221	22.13	22.9314	22.4514	22.8293	22.9075	22.9046	22.4171	23.5135	23.0893	22.7031	23.2725	22.4284	23.1171	22.8068	23.1079	22.9733	22.5597	23.3594	23.1564	22.5585	22.1503	22.2861	22.9537	23.2287	22.0796	22.1771	22.7062	22.2644
P61224	RAP1B	Ras-related protein Rap-1b	23.1763	23.6523	22.5272	22.436	23.8227	27.8112	22.3759	22.4865	22.9709	22.2601	22.227	22.5949	22.9821	23.6256	22.5353	22.6359	22.9761	22.9666	23.086	22.3021	22.1421	23.1017	22.7469	22.9726	21.4498	22.3225	22.3902	22.4953	22.9651	23.1737	22.8963	23.1197	22.8005	22.8363	22.4274	22.4832	22.2195	23.1052	23.1783	22.5928	22.741	23.2721	22.7374	22.9058	21.7224	22.4615	22.3421
P61626	LYZ	Lysozyme C	19.8032	20.5168	20.3705	19.9772	20.458	20.4828	20.4145	20.5036	20.1991	20.3397	20.1694	20.1169	20.87	20.7775	20.9207	20.6597	20.7762	20.9443	21.4711	21.1418	20.5931	20.7854	21.1153	20.7395	20.5981	20.5366	20.5675	20.7979	20.3172	20.5286	20.5982	20.3812	20.6482	20.3709	20.2313	20.2306	19.7584	19.8672	19.5372	19.4941	18.4575	19.0727	20.3343	18.5851	19.2872	17.467	18.936
P61769	B2M	Beta-2-microglobulin	19.5612	19.8263	20.3357	20.1336	20.0722	20.3609	20.0165	19.6703	20.1964	20.1874	20.4652	19.9588	20.0966	20.3124	20.0764	20.2752	20.1402	20.3447	20.1348	20.2312	20.1878	20.3764	20.2955	20.4223	19.7206	19.808	19.94	19.2977	19.7116	19.6489	20.0646	19.7582	19.8992	19.6516	19.9795	19.689	19.2513	19.4872	19.9821	19.6557	19.8602	19.6906	19.9261	19.5538	19.9611	19.7798	19.8502
P61916	NPC2	NPC intracellular cholesterol transporter 2	21.6304	20.6091	20.4427	19.9058	19.3031	19.6027	21.0852	20.2453	19.9286	19.9931	20.5012	19.8233	21.7386	20.5381	20.6754	20.3578	19.8258	21.4234	20.2856	21.2726	20.6283	20.6509	19.8849	21.443	20.5612	20.2286	20.1377	20.3426	21.1815	21.1633	20.5819	19.8504	20.9157	20.5591	20.6399	21.2231	21.4247	21.181	20.4853	20.2524	20.8228	21.45	20.6458	21.277	21.2647	20.7454	21.2011
P62937	PPIA	Peptidyl-prolyl cis-trans isomerase A	24.594	24.313	23.765	24.2609	24.4975	24.3568	24.5222	24.1621	24.226	24.0136	23.9177	23.9886	24.1498	23.9586	23.6996	23.9978	24.0717	24.1955	24.4842	23.9518	24.266	23.7208	23.757	24.227	24.1318	23.7061	23.9978	23.8281	23.9019	23.1143	23.6156	24.0643	24.292	24.2183	24.0335	23.6901	23.8181	24.6517	24.2342	24.4225	24.2548	24.6909	24.7848	23.8569	24.6882	24.1939	24.679
P67936	TPM4	Tropomyosin alpha-4 chain	21.7549	21.4824	21.5606	21.3233	21.5392	21.0723	21.3634	21.4625	21.3768	21.2771	21.2255	21.5269	21.4622	21.4272	21.3761	21.2238	21.4764	21.3601	21.2771	21.2603	21.3905	21.4959	21.4327	21.5331	21.6821	21.4348	21.5322	21.6221	21.5625	21.6275	21.5854	21.8607	21.5807	21.3593	21.4719	21.3641	21.2836	21.5797	21.4459	21.6526	21.6357	21.624	21.5696	21.6671	21.5883	21.5308	21.6039
P68871	HBB	Hemoglobin subunit beta	27.7341	26.0915	25.9744	25.8905	26.0536	25.7525	25.8742	25.6342	26.9901	25.7656	26.244	27.1288	25.9307	25.5115	25.7615	26.009	25.8627	25.7505	25.7358	25.0693	25.8407	25.6973	25.9888	25.6143	25.5484	25.8799	25.2252	25.7945	25.976	25.861	25.5959	25.8182	26.5316	25.9811	25.6517	25.7074	25.4529	25.6935	25.9351	25.9096	25.9117	25.2546	25.7107	25.4303	27.6224	25.7355	25.3057
P69905	HBA1	Hemoglobin subunit alpha	26.7905	25.1379	24.8869	24.852	24.9123	24.7127	24.6929	24.4776	25.9193	24.7106	25.1313	26.0775	24.8847	24.4479	24.5954	24.9244	24.7514	24.638	24.6085	23.8907	24.7712	24.6348	24.9371	24.5452	24.5466	24.7927	24.1684	24.6758	24.838	24.8133	24.4795	24.6787	25.444	24.9684	24.6243	24.6347	24.3025	24.6259	24.7893	24.7823	24.873	24.2302	24.6812	24.305	26.5165	24.6309	24.1184
P78417	GSTO1	Glutathione S-transferase omega-1	27.0755	27.1966	26.9167	26.9586	27.1087	26.7904	26.6218	26.6442	26.8824	26.9306	26.856	26.9923	26.7549	27.1827	27.0464	26.6622	26.8354	26.9366	26.9063	27.0523	26.9257	26.8151	26.7368	26.7437	27.0077	27.0763	27.0528	26.7995	26.8748	26.9098	26.7187	26.7834	26.6516	26.641	26.8844	26.742	26.7655	26.4166	26.9198	26.9347	26.7456	26.5347	26.6164	26.4533	26.723	26.323	26.2291
P78509	RELN	Reelin	23.9138	24.122	24.1575	24.0642	23.8851	24.0358	23.9137	23.8638	23.8708	23.8583	24.0175	23.7901	23.7302	23.9779	24.0971	23.8528	23.839	23.9806	24.061	23.8849	23.4025	23.7468	23.6237	23.4535	23.8845	23.8703	24.0685	23.7833	23.9673	23.9849	23.8662	23.8793	23.9357	23.7447	23.8202	23.8531	23.6285	23.7343	23.1389	23.7084	23.9147	23.6826	23.946	23.7462	23.6541	23.689	23.7821
P80108	GPLD1	Phosphatidylinositol-glycan-specific phospholipase D	25.8475	25.7493	25.7881	25.7915	25.7266	25.8064	25.8919	25.7574	25.7115	25.6215	25.6635	25.7222	25.7885	25.749	25.6995	25.7035	25.6666	25.6901	25.3995	25.5701	25.6554	25.5627	25.6494	25.5363	26.1752	25.8882	26.0602	26.0831	26.1333	26.0773	26.1269	25.9981	26.1724	26.0311	26.1509	26.1405	25.5251	25.4993	25.5089	25.4984	25.5227	25.5304	25.3614	25.5521	25.6466	25.6377	25.592
P80748	IGLV3-21	Immunoglobulin lambda variable 3-21	21.8535	21.6849	21.8404	21.5862	21.4573	21.467	21.5982	21.755	21.5875	21.5362	21.5825	21.5909	21.6312	21.7399	21.6819	21.4071	21.4299	21.4468	21.5102	21.4659	21.4587	21.4786	21.4699	21.4239	20.6371	20.4908	20.5375	20.4048	20.4577	20.6147	20.222	20.2768	20.2	20.2217	20.3611	20.3951	21.49	21.7469	21.5569	21.5271	21.8946	21.6482	21.6269	21.8548	21.8179	21.8332	21.7456
P84085	ARF5	ADP-ribosylation factor 5	23.5222	23.4689	23.2025	23.457	23.6102	23.5674	22.7059	23.7653	23.145	22.7816	23.254	23.011	23.1968	23.0603	22.4997	22.9597	22.8283	23.2146	23.1604	22.6229	22.595	23.1413	22.5621	22.8631	23.0873	23.0611	22.78	23.1104	23.3404	23.0471	23.5972	23.3827	22.7055	23.0008	23.3153	22.85	22.6375	22.6957	23.1605	22.9314	22.6779	22.6788	22.713	22.3769	22.9304	22.6368	22.8885
P98160	HSPG2	Basement membrane-specific heparan sulfate proteoglycan core protein	23.7006	23.708	23.9941	23.6512	23.5048	23.8399	23.9709	23.8383	23.9323	23.7202	23.6872	23.6778	23.6701	23.7213	23.6803	23.5892	23.6697	23.7428	23.4126	23.546	23.486	23.508	23.7107	23.6626	23.5388	23.6986	23.6843	23.3549	23.632	23.736	23.5572	23.548	23.3061	23.5668	23.6085	23.4987	23.6805	23.5498	23.93	23.5488	23.8168	23.7264	23.8562	23.8189	23.7925	23.9208	23.6872
Q00610	CLTC	Clathrin heavy chain 1	24.6432	24.3748	24.1419	24.4226	23.9574	24.0804	24.0699	23.9491	23.9652	23.995	24.0031	23.8861	24.2842	24.045	24.0226	23.7724	23.8142	23.7429	23.928	23.7217	23.6315	23.6338	23.7947	23.8291	24.3734	24.1889	24.1101	24.0004	24.0387	23.8629	24.0956	24.2642	24.2786	23.9816	24.3061	24.2493	23.935	23.7708	23.6427	23.8475	23.5706	23.6447	23.7402	23.6106	24.205	23.7346	23.9998
Q01459	CTBS	Di-N-acetylchitobiase	23.801	24.0763	24.0843	24.0139	23.1329	23.8612	23.5343	23.9882	23.9098	23.7477	23.8845	23.7988	23.4949	23.8301	23.3741	22.4943	23.9796	23.7692	23.6299	23.7715	23.6072	23.7684	23.8131	23.5899	24.1171	24.3897	23.4734	23.1574	23.3485	23.8213	23.4069	23.8006	23.3727	23.0463	23.8494	23.9384	23.8896	24.1035	23.9585	24.2939	24.294	24.2681	24.5897	24.4677	24.2208	23.9363	24.3911
Q01518	CAP1	Adenylyl cyclase-associated protein 1	27.3776	27.4791	27.2977	27.4318	27.6138	27.1913	27.429	27.3859	27.3601	27.3014	27.1929	27.2017	27.2534	27.2877	27.3866	27.2243	26.8609	27.3005	27.5064	27.2622	27.3141	27.0712	27.1754	27.3066	27.1667	27.2619	27.5775	27.3958	27.3289	27.4334	27.2475	27.2559	27.2307	27.1998	27.2626	27.1834	26.7927	26.7116	26.8426	26.8743	26.6454	26.7138	26.9863	26.832	26.809	26.8201	26.862
Q02413	DSG1	Desmoglein-1	28.9436	28.9859	29.1248	29.3043	28.8109	29.2964	29.0455	29.1449	28.6212	29.0073	29.0329	28.9084	29.0175	28.887	28.7215	28.9384	28.8992	28.676	28.5767	29.003	28.5559	28.8189	28.6966	28.7688	29.016	28.899	28.8136	29.111	28.776	28.7746	28.9274	28.9462	28.825	29.1622	28.9469	29.0297	28.9897	28.8702	29.0919	29.1532	29.2087	29.2271	29.1325	29.2659	29.1989	29.3329	29.2489
Q03181	PPARD	Peroxisome proliferator-activated receptor delta	19.5511	19.2492	19.701	19.6385	19.7506	19.8071	19.6692	19.7773	19.7516	19.8426	19.7775	19.6733	19.659	19.7927	19.8564	19.8037	19.808	19.6613	19.8023	19.6343	19.7909	19.6622	19.6991	19.7318	19.7472	19.9103	19.7544	19.8468	19.836	17.4177	19.7932	19.6463	19.6992	19.7115	19.5667	19.658	19.6733	19.0262	19.4734	19.4881	19.4864	19.6458	19.3655	19.6125	19.4971	19.2346	19.3881
Q03591	CFHR1	Complement factor H-related protein 1	27.9174	27.9222	27.8652	27.867	28.083	27.7663	27.8119	27.75	27.6886	27.8252	27.6939	27.6976	27.9742	28.1372	28.2381	28.0418	28.0923	28.2404	28.3532	28.0624	28.0375	28.0599	28.0884	28.0454	28.0143	27.8413	28.2614	28.0197	27.9093	28.3493	28.0339	27.9397	27.8847	27.9732	27.9635	27.9776	28.2084	28.204	28.0565	28.1132	28.0761	28.1705	28.512	28.2186	28.268	28.3203	28.2722
Q04756	HGFAC	Hepatocyte growth factor activator	23.1384	23.1411	23.2216	23.1094	22.9293	22.9422	23.1075	22.8469	23.0328	23.0901	22.9752	23.1128	22.7489	23.0981	23.2212	23.016	23.0958	23.1932	23.096	22.8607	23.1306	22.8572	23.0599	22.9559	22.9068	23.1373	22.8743	23.0588	22.9594	23.0231	23.0387	22.8922	22.9351	22.7277	23.0612	22.7625	22.9525	23.0943	23.0378	22.9206	22.8839	22.7755	23.0516	22.9472	22.9552	22.8998	22.8524
Q05682	CALD1	Caldesmon	26.4045	26.4686	26.7101	26.6638	26.8176	26.8348	26.7344	26.5973	26.8544	26.7031	26.7822	26.7836	25.6614	25.8684	25.7152	26.1287	26.0129	25.9552	25.8309	25.7629	25.6373	25.9706	25.9997	25.981	25.944	25.8631	25.7422	25.7511	26.0679	25.4432	25.995	26.0357	25.8206	26.0968	26.0236	26.0329	25.9639	25.4128	26.4623	26.3317	26.3483	26.277	26.3268	25.6355	26.5042	26.2808	26.2057
Q06033	ITIH3	Inter-alpha-trypsin inhibitor heavy chain H3	24.4336	24.3057	24.2839	24.2092	24.3166	24.3544	24.157	24.0513	23.9937	24.0728	24.072	24.22	24.5201	24.2258	24.226	24.2033	24.1892	24.1659	24.1656	24.2938	24.256	24.3778	24.4393	24.4141	24.1057	24.2107	24.077	24.1841	24.1702	24.2495	24.4198	24.1856	24.1788	24.2467	24.2139	24.1597	24.626	24.3363	24.4488	24.2974	24.3494	24.3257	24.5955	24.3612	24.2295	24.3231	24.3376
Q06830	PRDX1	Peroxiredoxin-1	23.8572	24.3747	23.8605	24.0799	24.0663	24.2315	25.0056	24.4383	24.358	24.4384	24.2673	24.5676	24.3337	24.5785	24.231	24.3673	24.7643	24.4508	24.3245	24.1266	24.5251	24.5586	23.7777	24.158	24.201	23.8829	23.9932	24.3727	24.1426	24.4897	24.4493	24.7366	24.5149	23.8984	24.549	24.613	24.7409	24.8153	24.8181	24.8601	24.8128	24.8218	24.5848	24.7819	24.8772	24.9908	24.803
Q07075	ENPEP	Glutamyl aminopeptidase	24.2582	24.3352	24.3426	24.2135	24.2429	26.0114	23.3529	24.0194	24.1535	24.2062	24.2167	23.7994	24.3742	24.4671	24.2872	24.2121	24.2068	24.2965	24.4517	24.4825	23.927	24.1629	24.0417	24.4074	24.424	24.0481	24.4445	24.5783	24.2368	24.5592	24.161	24.3579	24.2403	23.8966	24.3001	24.1582	24.5147	24.7648	24.4236	24.3234	24.6713	24.3958	24.8509	24.7132	23.9157	24.5651	24.5695
Q07954	LRP1	Prolow-density lipoprotein receptor-related protein 1	27.4513	27.3119	27.5348	27.5253	27.5973	27.5906	27.4956	27.5867	27.4702	27.3957	27.6263	27.5654	27.3141	27.4518	27.4087	27.4097	27.3147	27.4576	27.4689	27.3455	27.4084	27.2331	27.2747	27.3455	27.3037	27.2145	27.4055	27.4625	27.3376	27.3598	27.2473	27.2442	27.3273	27.3207	27.2989	27.3513	26.9738	27.0198	27.0537	27.1266	27.0596	27.08	27.2176	27.0181	27.0385	27.0556	27.0935
Q08188	TGM3	Protein-glutamine gamma-glutamyltransferase E	22.248	22.1093	22.4637	22.4714	22.4379	22.2218	22.3745	22.2805	22.1924	22.6213	22.1491	22.4329	22.2331	22.3299	22.3462	22.494	22.4974	22.4242	22.1702	22.3746	22.1411	22.2302	22.4697	22.1139	22.3168	22.7383	22.4578	22.1152	22.4438	22.4652	22.6006	22.4537	22.1499	22.3161	22.4493	22.4144	22.0499	21.7504	22.1515	22.027	22.2444	22.1215	22.2467	22.2019	22.0952	22.1448	22.3831
Q08380	LGALS3BP	Galectin-3-binding protein	28.4675	28.0879	28.5053	28.4249	28.3393	28.4294	28.3375	28.4148	28.5163	28.5828	28.4584	28.164	28.4961	28.5989	28.6789	28.6788	28.5739	28.4508	28.5241	28.4489	28.5245	28.4177	28.5011	28.4073	29.4442	29.2894	29.2401	28.9904	29.286	29.2722	29.3079	29.2083	29.2866	29.3045	29.1822	29.2492	28.4113	28.2109	28.3619	28.115	28.387	27.7767	28.0879	28.3624	28.342	28.4557	28.2326
Q08830	FGL1	Fibrinogen-like protein 1	25.6074	25.9516	25.9545	25.7653	26.0008	26.0661	25.8158	25.9157	25.5435	26.0759	26.0508	25.7338	25.7719	25.693	25.8368	25.6107	25.737	25.6908	26.0021	25.7491	25.5412	25.6185	25.9897	25.4259	25.6719	25.5875	26.0073	25.8374	25.7469	25.639	25.8473	25.7605	25.9093	25.8933	25.6957	25.9341	24.8859	24.8716	25.7662	25.0263	24.8842	25.2541	25.7555	25.3668	25.3236	25.595	25.5338
Q10588	BST1	ADP-ribosyl cyclase/cyclic ADP-ribose hydrolase 2	22.076	22.5107	22.0463	22.1794	22.1695	22.2449	22.0438	22.1748	22.2042	22.1807	22.0669	22.0642	21.7103	21.4438	22.0211	21.2935	21.6234	21.8521	22.4977	21.4152	21.5758	21.2832	21.5723	21.5859	22.0729	21.9915	22.9727	22.4612	22.1837	22.4016	22.0269	22.148	22.0363	22.0487	22.0499	22.2223	21.9084	21.9746	21.6769	21.8086	21.7173	21.833	22.4871	21.8715	21.8007	21.9412	21.6181
Q12805	EFEMP1	EGF-containing fibulin-like extracellular matrix protein 1	22.2861	22.4116	22.4795	22.3791	21.7216	21.6721	21.9545	22.0625	22.0822	22.039	21.9373	21.8367	22.0282	22.3301	22.1558	22.0529	22.0457	21.9875	22.0124	22.1422	22.0595	21.9068	21.8523	22.1015	21.8603	21.8	22.4196	21.9144	21.7099	21.6852	21.3471	21.5534	21.2467	21.6595	21.633	21.3147	22.7818	22.8448	22.3265	22.4866	22.5495	22.2817	22.518	22.6116	22.2413	22.4908	22.6343
Q12841	FSTL1	Follistatin-related protein 1	23.7454	23.7068	23.8909	22.7646	23.8059	23.8809	23.9825	24.242	23.9477	24.1924	22.8953	24.1353	23.9303	23.3384	24.5666	24.5839	23.8649	22.7983	24.5392	24.1229	22.8989	24.2953	24.2847	23.0516	24.0676	24.3245	24.6238	23.9834	23.9444	24.2405	23.8429	23.8665	23.9261	23.8568	22.7189	23.857	24.559	23.9113	24.7186	24.0411	23.8586	23.5385	24.5914	24.6093	23.7604	23.8438	24.0988
Q12860	CNTN1	Contactin-1	23.3364	23.4712	23.3632	23.4218	23.1841	23.2806	23.2489	23.1801	23.1397	23.0911	22.606	22.9444	23.2059	23.3566	23.4707	23.2557	23.4023	23.3327	23.4679	23.149	23.2381	23.0636	22.9923	22.9964	23.3027	23.2346	23.615	23.4026	23.3433	23.411	23.2383	23.2821	23.3265	22.9756	23.1205	23.2727	23.1096	23.2637	23.1244	23.0645	23.2501	23.007	23.4058	22.966	23.0402	23.1538	23.3969
Q12913	PTPRJ	Receptor-type tyrosine-protein phosphatase eta	25.4437	25.2616	25.2859	24.9645	24.8196	24.5872	24.509	24.2299	24.563	24.7045	24.6897	24.289	25.1738	25.2295	25.1919	24.4768	24.7392	24.5927	24.6741	24.6197	24.473	24.161	24.489	24.3258	24.8308	25.1804	24.8523	24.5982	24.6467	24.8856	24.517	24.3274	24.5371	24.1765	24.5288	24.557	25.2927	24.6982	23.5455	24.9519	25.051	24.7869	24.8745	24.9693	24.6925	24.6305	24.8172
Q13201	MMRN1	Multimerin-1	24.2781	24.1058	24.4277	24.3376	24.5642	25.0456	24.8547	24.5716	24.9558	24.4259	24.2823	24.8737	24.7102	25.635	25.2132	24.5504	25.6134	24.7163	25.3706	23.2643	24.832	24.2295	24.8776	24.8555	24.8391	24.3576	24.2443	24.8392	24.8034	24.3068	24.7067	24.2787	24.6622	24.7832	24.4217	24.7131	24.5106	24.6232	25.8269	24.9745	25.5623	25.368	24.897	25.6484	26.3391	24.8328	23.8114
Q13228	SELENBP1	Methanethiol oxidase	26.1058	26.1633	26.1655	26.2433	26.0808	26.2509	26.3093	26.1045	26.1598	26.1665	26.2412	26.2587	26.1316	26.3571	26.0814	26.0245	26.1533	26.1286	26.0795	26.1691	26.3986	26.1834	26.2503	26.1991	25.8762	25.6815	25.8814	25.8797	25.9401	25.8745	25.93	25.8605	25.8816	25.9517	25.9424	25.8401	25.6164	25.401	25.5327	25.1095	24.6592	25.255	25.0761	25.8549	25.891	25.809	25.7598
Q13332	PTPRS	Receptor-type tyrosine-protein phosphatase S	28.4523	28.3482	28.5331	28.4646	28.4074	28.6295	28.3262	28.4497	28.6303	27.5878	28.4733	28.3354	28.2797	28.1756	28.3683	28.4603	28.4342	28.4311	28.2104	28.2813	28.4139	28.319	28.4509	28.3328	28.2874	28.4445	28.2471	28.2487	28.1709	28.1192	28.1257	28.3052	28.2035	28.1147	28.3084	28.2771	26.7626	28.1077	28.7123	28.5182	28.3233	27.9275	28.4076	28.4027	28.3541	28.5306	28.4482
Q13508	ART3	Ecto-ADP-ribosyltransferase 3	24.9675	24.8433	25.0592	24.9935	25.1743	24.0322	25.1025	23.8478	23.9067	25.2604	24.0015	24.0196	25.0205	24.8945	25.0363	25.0588	24.1782	23.978	23.9655	25.1586	24.7198	23.9594	23.8507	24.8709	23.8421	24.2534	24.1293	23.6841	24.6646	24.7319	24.9018	24.6713	23.7442	23.683	24.852	23.7404	23.5595	23.6145	23.7613	23.7352	23.6512	23.7056	23.7548	23.7448	23.9725	23.8792	23.7635
Q13740	ALCAM	CD166 antigen	21.6889	21.6632	21.5264	21.3714	21.3822	21.2905	21.3791	21.917	21.0385	21.3199	21.4045	21.2757	21.7489	21.604	21.0955	21.6841	21.43	21.1386	21.5336	21.3228	21.4656	21.6248	21.4092	21.5047	21.531	21.5805	21.4694	21.6055	21.4789	21.5883	21.7565	21.7405	21.3449	21.4133	21.5585	21.7659	21.2984	21.7844	21.4158	21.1079	21.5448	21.6666	21.5121	21.6344	21.9351	21.1552	21.4498
Q13790	APOF	Apolipoprotein F	20.6676	20.3769	20.5651	20.6072	20.5685	20.4372	20.6105	20.5432	20.4851	20.4887	20.5712	20.4478	20.3818	20.1896	20.1681	19.9379	20.0006	20.1489	19.8438	19.9712	19.9432	20.1222	19.9664	19.8979	20.4853	20.3696	20.1434	20.2502	20.2286	20.2473	20.5465	20.474	20.3979	20.234	20.1934	20.2976	20.4161	20.2992	20.3648	20.3921	20.2953	20.4153	20.2969	20.212	20.2154	20.3353	20.3108
Q13822	ENPP2	Ectonucleotide pyrophosphatase/phosphodiesterase family member 2	26.7456	26.7426	26.8223	26.8881	26.6784	26.8685	26.6242	26.923	26.8657	26.8363	26.7587	26.7698	26.7584	26.7515	26.9007	26.7863	26.9024	27.0494	27.035	26.816	26.9263	27.0441	26.8775	26.7212	26.4674	26.6867	26.3007	26.5835	26.615	26.7013	26.754	26.734	26.6828	26.5203	26.535	26.3742	26.2943	26.4818	26.1746	26.253	26.6588	26.3701	26.1069	26.5868	26.7253	26.7389	26.6868
Q13867	BLMH	Bleomycin hydrolase	22.415	22.4695	22.1825	22.3086	22.1629	22.285	21.507	21.8958	22.3122	22.2539	22.1823	22.2359	22.5788	22.3787	22.4528	22.167	21.8885	22.7614	21.6967	22.5041	21.3318	21.5896	22.1035	22.3373	22.2534	22.6902	22.6287	22.6549	22.7403	22.3794	22.4702	22.9389	22.5658	22.1821	22.8145	22.458	22.2551	22.5045	22.9664	22.6541	22.5195	22.6964	22.8421	22.4731	22.5512	22.7306	22.3813
Q14247	CTTN	Src substrate cortactin	21.9099	22.0071	22.1363	22.0945	21.8812	22.1045	21.8751	21.9048	22.1868	22.2928	21.9446	22.1663	22.1057	21.8698	21.8423	22.1338	22.081	22.0127	22.0443	22.0394	22.0106	22.0849	21.9054	21.9531	21.9288	21.3933	21.834	22.0702	22.069	21.9747	21.862	21.8433	22.0699	22.0586	21.9168	22.0315	21.5912	21.6991	21.8987	21.8391	21.3567	21.4215	21.3171	21.7068	21.2482	21.3555	21.4161
Q14515	SPARCL1	SPARC-like protein 1	26.4787	26.4584	26.2965	26.8478	26.5156	26.6223	26.367	26.0833	26.5752	25.7424	26.2054	26.4745	26.2325	26.3216	26.4269	25.9368	26.1932	26.5563	26.5335	26.2137	26.1074	26.207	25.9076	26.0122	26.1902	26.1514	26.7125	26.4392	26.4703	26.5172	26.1134	26.4454	26.1635	25.9805	26.0518	25.9458	26.3223	26.1769	26.1154	26.0624	25.783	25.9019	26.0386	25.8288	26.144	26.1543	25.9479
Q14520	HABP2	Hyaluronan-binding protein 2	23.3162	23.5808	23.3956	23.4315	23.3851	23.3122	23.4108	23.2695	23.518	23.446	23.4673	23.5377	23.5221	23.5707	23.4852	23.5429	23.563	23.5993	23.3238	23.5047	23.4168	23.4115	23.5259	23.3335	23.5277	23.6503	23.4958	23.5483	23.6512	23.5721	23.5818	23.6545	23.5308	23.6361	23.6452	23.6509	23.5618	23.5019	23.6193	23.625	23.5758	23.3738	23.5083	23.4743	23.4597	23.5097	23.5476
Q14624	ITIH4	Inter-alpha-trypsin inhibitor heavy chain H4	24.5231	24.5302	24.5841	24.5501	24.5194	24.5773	24.5728	24.5035	24.399	24.4513	24.477	24.5586	24.6696	24.6108	24.4801	24.4973	24.5822	24.5233	24.4384	24.4882	24.4643	24.4395	24.5006	24.5262	24.4646	24.433	24.1696	24.2874	24.4117	24.1967	24.4954	24.4003	24.3913	24.3917	24.4485	24.3253	24.6112	24.6103	24.5788	24.6088	24.6151	24.6298	24.5262	24.5826	24.5385	24.5622	24.5693
Q15063	POSTN	Periostin	25.7108	25.4175	25.8208	25.8883	25.461	24.5295	25.1971	25.0636	25.558	25.6013	24.0183	25.033	25.8487	25.8658	26.3212	25.5143	25.7055	25.749	25.7116	25.851	24.9671	25.2053	25.1511	25.888	25.9978	25.5274	26.5223	25.3245	25.6207	26.2362	25.7066	25.6658	25.7604	25.6563	25.9492	25.6026	25.7935	25.9296	25.0963	25.5156	26.1426	26.142	26.2821	26.1593	25.1735	25.9628	26.0446
Q15084	PDIA6	Protein disulfide-isomerase A6	22.3497	22.3414	22.3434	22.1847	21.9753	22.3299	22.0744	22.0075	21.9292	22.0324	22.011	22.011	22.7091	22.7579	22.6252	22.6631	22.7652	22.6275	22.6872	22.5631	22.4938	22.4506	22.4245	22.5198	22.7355	22.7532	22.9391	22.7144	22.9296	22.8555	22.8111	22.5513	22.7811	22.7536	22.8086	22.8271	22.948	22.8838	22.7304	22.8089	23.0376	22.8734	22.8046	22.8028	22.562	22.4697	22.9772
Q15113	PCOLCE	Procollagen C-endopeptidase enhancer 1	27.8928	28.1916	27.7838	27.6582	27.2184	28.2173	28.1574	27.6767	27.5401	27.5097	27.7021	28.0107	27.8934	28.3123	28.5057	28.2206	28.4944	28.3314	28.387	28.2809	28.0233	28.5074	28.2969	28.2511	27.8477	27.7946	27.8895	27.963	27.9752	27.8927	28.1299	27.954	27.6784	27.8011	27.8177	27.8009	28.1249	27.9219	27.9471	28.1943	28.3844	28.2711	28.2182	28.0102	28.0933	27.7977	28.2496
Q15166	PON3	Serum paraoxonase/lactonase 3	23.3579	23.4138	23.4904	23.5174	23.5387	23.3947	23.3671	23.3322	23.355	23.4588	23.2711	23.3105	22.9201	23.0073	23.0846	22.9398	22.9005	23.0775	22.9307	22.7588	22.8653	22.8302	22.6025	22.937	23.0263	22.9418	23.1613	23.2188	22.9792	22.8235	23.0221	23.0324	22.8816	22.926	22.903	22.9252	22.8903	23.2616	22.7702	22.9008	23.0736	23.0353	23.0194	22.9056	23.0039	23.0208	22.8884
Q15404	RSU1	Ras suppressor protein 1	24.2944	24.3993	24.1316	24.3298	24.1519	24.2167	24.0128	23.9533	23.8876	24.1073	23.8358	23.8288	24.3835	24.4648	24.6889	24.1572	24.2026	24.5171	24.8941	24.2579	24.2733	24.1319	24.2218	24.1651	24.2865	24.3132	24.9772	24.3847	24.2849	24.4249	23.8888	23.9126	24.0193	23.9243	24.1439	24.1134	24.4829	24.4515	24.0777	24.3009	24.3403	24.3364	24.6438	24.2326	24.1529	23.8545	24.1603
Q15555	MAPRE2	Microtubule-associated protein RP/EB family member 2	25.5183	25.461	25.376	25.3618	25.4113	25.5553	25.5222	25.6021	26.0335	25.5253	25.5914	25.8925	24.9388	24.7527	24.7229	24.7678	24.8086	24.7469	24.7219	24.98	24.9428	24.9604	24.9766	24.9926	25.0557	23.9262	25.1133	24.8569	25.1357	25.0321	25.1105	25.0348	25.1087	25.231	25.0648	25.126	24.2055	23.8253	24.1434	24.6241	24.195	23.7246	24.4594	24.4376	24.0152	24.2776	24.6111
Q15582	TGFBI	Transforming growth factor-beta-induced protein ig-h3	26.8757	26.8458	26.827	27.0628	26.932	27.0437	27.066	27.108	27.0388	26.8311	26.9042	26.9594	27.0253	27.0259	26.7516	27.1204	27.0661	26.907	27.147	27.0711	26.9207	26.6863	27.0949	27.0495	27.0362	26.9631	26.8677	27.1912	27.1149	26.9733	26.9536	27.0197	27.169	26.9642	27.1238	27.0993	26.8362	26.8532	26.9485	26.9756	26.9668	27.0167	26.9116	27.0813	26.9185	26.9966	27.0833
Q15691	MAPRE1	Microtubule-associated protein RP/EB family member 1	26.2086	25.9095	26.0971	26.2416	26.0932	25.9889	25.9059	25.9562	25.1697	25.5727	25.7929	25.9622	26.1586	25.6432	25.8362	25.7442	25.7867	25.9078	25.7782	25.673	25.8998	25.5648	25.9521	25.5233	26.2275	25.4116	26.0182	26.0618	26.1789	26.1578	23.9744	26.1501	26.0688	26.2151	26.1992	26.3478	25.5447	25.687	26.0435	26.1916	25.7652	26.0789	26.066	26.2241	26.3998	26.1756	26.3576
Q15762	CD226	CD226 antigen	24.5108	24.9759	24.4629	24.4915	24.4674	24.3428	24.6224	24.5754	24.1129	24.4947	24.1988	24.5888	24.5648	24.6787	24.3644	24.4894	24.8736	24.7899	24.5629	24.5637	24.0554	24.3895	24.5765	24.6582	24.4924	25.1311	24.5823	24.4683	24.86	24.7855	24.6677	25.1031	24.4006	24.6039	24.8122	24.8848	24.5704	24.7192	24.557	24.9138	25.0299	24.2409	24.6844	24.425	24.692	24.806	24.2874
Q15848	ADIPOQ	Adiponectin	20.6977	20.4272	20.1865	20.7537	19.8109	20.4916	20.2508	20.2193	22.1237	20.2951	20.1117	20.2498	20.4579	20.4035	20.4403	20.43	20.4657	20.44	20.2334	20.7638	20.1636	20.2861	20.5603	20.3479	19.1826	19.2982	19.647	21.1044	19.6932	21.0067	19.5099	19.0986	18.9552	18.8259	19.3866	19.3147	22.1668	22.1433	21.5866	21.4392	22.0429	21.5307	21.6081	21.8432	21.8613	21.9271	22.0235
Q15942	ZYX	Zyxin	27.8128	27.6853	27.7723	27.7662	27.8483	28.1589	27.9439	27.946	28.1573	28.132	27.9354	28.0386	27.6199	27.9159	26.8947	27.9791	27.7674	27.7635	27.7136	27.9812	27.9173	27.9677	27.9565	27.8325	27.781	27.77	27.813	27.8347	27.8208	27.5836	27.6745	28.083	27.7137	27.686	27.6946	27.8028	27.5594	27.6975	27.7214	27.6243	27.6383	27.6636	27.5827	27.585	27.7193	27.7528	27.8199
Q16270	IGFBP7	Insulin-like growth factor-binding protein 7	22.1215	22.377	22.2143	22.164	22.1878	22.0994	22.1576	21.4364	22.0002	22.0332	22.1453	21.8178	22.313	22.3039	22.5993	22.1768	22.1531	22.4617	22.7101	22.39	22.1605	22.086	22.1946	22.2076	22.3672	21.9409	22.7953	22.265	22.2497	22.8005	22.3764	22.5058	22.3084	22.3493	21.5775	22.283	22.0456	22.2798	22.3204	22.2319	22.3126	22.1623	22.8135	22.4683	22.4749	22.4975	22.3603
Q16610	ECM1	Extracellular matrix protein 1	20.1091	20.6944	19.8872	20.3146	20.4237	20.2639	20.1252	20.1703	20.1207	20.3628	19.937	19.7408	19.4661	19.8263	19.9873	19.532	19.6467	19.931	20.3746	19.6247	19.7335	19.4863	19.6597	19.4915	19.7361	19.9563	20.9332	20.8151	20.2805	20.0564	19.7438	19.6411	19.8054	19.9963	20.0778	20.1715	20.2563	20.2894	19.9806	20.0122	20.1135	20.0907	20.5032	19.9728	20.0931	20.18	19.9766
Q16706	MAN2A1	Alpha-mannosidase 2	25.8181	25.5202	25.3846	25.6272	25.7778	25.5031	25.4588	25.5134	25.5869	25.5497	25.485	25.4571	25.5688	25.3845	25.2471	25.4051	25.3561	25.3113	25.2889	25.3972	25.5138	25.4677	25.4475	25.3733	25.5208	25.4624	25.4519	25.4646	25.5834	25.3468	25.2563	25.1591	25.4476	25.2643	25.2686	25.4555	25.5612	25.6564	25.2592	25.328	25.5048	25.5845	25.496	25.4054	25.3871	25.4324	25.6573
Q16853	AOC3	Membrane primary amine oxidase	23.4116	23.1975	23.393	23.4606	23.4621	22.9342	23.0502	23.059	23.1591	23.232	23.4768	23.1388	22.9684	22.6978	23.1953	23.7261	22.5661	23.3184	23.2479	22.2215	22.3759	22.1637	22.2626	22.8268	23.1492	23.3292	23.3889	23.4226	23.3144	22.9666	22.7711	23.3033	23.1621	23.0169	23.0205	22.8589	23.0381	22.8415	22.7974	22.9127	23.1017	22.9541	22.4804	23.0645	22.554	22.8012	22.7534
Q3SY84	KRT71	Keratin, type II cytoskeletal 71	21.4395	21.3016	21.2984	21.4861	21.5046	21.3841	21.3474	21.5549	21.2552	21.4086	21.5558	21.5556	21.4833	21.1635	21.1896	21.3672	20.8304	20.8304	21.2899	21.1491	20.7202	21.237	21.2316	21.185	21.2788	21.5252	21.5297	21.586	21.5517	21.5638	21.5297	21.3642	21.561	21.4437	21.4911	20.389	21.2099	20.8853	21.6382	21.2785	21.3713	21.1188	21.0733	21.2255	21.6451	20.6256	21.316
Q4LDE5	SVEP1	Sushi, von Willebrand factor type A, EGF and pentraxin domain-containing protein 1	29.3934	29.2536	29.3811	29.224	29.159	29.2362	27.398	29.0757	29.372	29.0153	29.0162	29.0235	29.1085	29.3191	29.2301	29.2518	29.3497	29.0788	29.1323	29.2239	29.0376	27.0104	29.1675	29.1974	29.4633	29.3282	29.025	29.2048	29.3733	29.1745	28.9047	28.9544	28.9743	29.1252	29.1095	28.8159	29.3449	29.3237	28.8211	29.1758	29.2296	29.3108	29.0992	29.3818	29.1733	29.2637	29.2162
Q562R1	ACTBL2	Beta-actin-like protein 2	23.7392	21.5404	22.8288	22.7394	22.8877	22.6755	22.8402	22.9769	22.9484	22.8599	22.9581	22.665	21.0791	22.3841	22.3747	22.4712	22.8302	22.6206	23.8597	22.633	22.6462	22.97	23.3454	23.7079	22.7024	22.3011	22.4081	22.5477	22.6942	22.5738	22.5852	23.0511	23.0955	22.8684	22.7669	22.6171	22.3683	24.1403	23.4368	22.4264	22.4053	24.5971	23.7713	22.9484	22.7378	21.753	23.4439
Q5SYB0	FRMPD1	FERM and PDZ domain-containing protein 1	26.3358	26.7428	26.291	26.5382	26.4328	26.5632	25.9439	25.9456	26.408	26.1199	26.4047	25.9281	26.1747	26.3272	26.5333	26.1801	26.3469	26.6045	26.7294	25.8946	26.2346	26.1672	26.0265	26.2416	26.3445	26.3956	26.5655	26.3387	26.5312	26.5642	26.3326	25.9458	26.0327	26.1654	26.4209	26.2278	26.7322	26.6945	26.3071	26.2838	26.7352	26.7281	26.8079	26.6994	26.6252	26.6215	26.6543
Q6EMK4	VASN	Vasorin	15.6299	15.3018	15.3009	15.5223	15.5818	15.4964	15.5907	15.005	15.4954	15.0157	14.8684	15.7987	16.1583	16.8172	15.9876	16.1065	15.94	15.823	15.8039	16.0166	15.6856	15.4567	15.8394	15.3659	15.7937	16.2491	15.8924	15.4496	15.8154	15.8235	15.2046	15.2897	15.4621	15.407	15.7535	15.5969	16.9745	16.6777	16.0309	16.371	16.9358	16.7197	16.7271	16.8093	16.0952	16.3461	16.6496
Q6GTS8	PM20D1	N-fatty-acyl-amino acid synthase/hydrolase PM20D1	23.2434	23.0977	23.2473	23.1316	23.2064	23.0763	23.1871	23.0553	23.1365	22.931	23.3513	23.1172	22.9408	22.876	22.8956	22.9284	22.9033	22.7778	22.7383	23.0066	22.7268	22.5517	22.6716	22.3138	22.8332	22.4211	22.7428	22.754	22.7472	22.703	22.6461	22.5905	22.431	22.5922	22.6673	22.6365	22.6125	22.7935	22.6914	22.7298	22.5079	22.7797	22.5699	22.9614	22.6668	22.6215	22.7967
Q6P179	ERAP2	Endoplasmic reticulum aminopeptidase 2	25.061	25.7728	25.0362	25.6233	25.5993	25.8594	25.6939	25.9477	26.344	25.8305	25.1542	25.1613	25.4377	25.5323	25.4118	25.66	25.3883	25.3843	25.3238	25.402	25.3748	25.5336	25.4723	25.4221	25.4574	24.726	25.3427	25.4819	25.4326	25.3134	25.4851	25.3805	25.4981	25.5147	25.4328	25.4864	25.0233	24.8126	25.574	25.307	25.138	25.275	25.1876	25.1737	25.3761	25.6259	25.271
Q6UWP8	SBSN	Suprabasin	24.037	23.7159	23.9453	23.7961	23.3423	24.0295	23.864	23.8531	23.929	23.7564	23.5415	23.7689	23.5531	23.7909	23.9485	23.8735	23.5156	23.8477	23.8932	23.5935	23.7606	23.7053	23.5221	23.6767	23.5938	24.0137	23.7483	23.6112	23.8416	23.7555	23.4716	23.8091	23.7538	23.6113	23.6682	23.7171	23.6494	23.8216	23.7831	23.9661	23.9707	23.9831	23.7599	23.9986	23.7795	23.8825	23.9905
Q6UXB8	PI16	Peptidase inhibitor 16	23.5401	23.5378	23.161	23.4528	23.4915	23.5552	22.9502	23.1372	22.8879	22.8287	23.2119	22.7903	23.5485	23.3627	23.758	23.2545	23.3731	23.6397	23.7066	23.3452	23.5458	23.5017	23.5631	23.5177	23.2033	22.8276	23.4566	23.5098	23.3401	23.2425	23.0425	22.8509	23.3433	23.0666	23.1048	22.7751	23.8983	23.9922	23.4966	24.0231	23.9546	23.8207	23.9811	23.8088	23.794	23.5343	23.7817
Q6YHK3	CD109	CD109 antigen	27.9847	27.9022	28.1123	28.2154	28.0683	27.7503	27.9829	28.0414	28.0003	28.0506	28.0292	28.0349	27.8218	27.8675	27.9077	27.935	28.0208	27.865	27.9073	27.8196	27.8922	27.9107	27.9465	27.8442	27.9561	28.0781	27.9977	27.9975	27.9276	27.8903	28.0231	27.9554	27.8467	27.7372	27.7927	27.6919	27.1489	27.3298	27.7787	27.7645	27.8152	27.8108	27.7237	27.8111	27.6784	27.8256	27.7712
Q76LX8	ADAMTS13	A disintegrin and metalloproteinase with thrombospondin motifs 13	25.7246	25.609	25.6896	25.1893	25.9948	25.4303	25.122	25.8299	25.4015	25.5137	25.6098	25.5151	25.7045	25.685	25.1996	25.6224	26.1883	25.77	25.9788	25.4736	25.7445	25.2869	25.7903	25.1241	25.7855	25.3966	25.3054	25.7423	25.719	25.6625	25.6402	25.7871	25.8422	25.6943	25.642	25.7008	25.8302	25.7178	25.4401	25.6375	25.3705	25.7027	25.321	26.0153	25.1269	25.3579	25.7077
Q7Z794	KRT77	Keratin, type II cytoskeletal 1b	23.5275	23.5887	24.2801	23.8245	24.3776	24.3867	23.2734	24.2697	24.0165	24.3661	24.0949	24.2961	23.9572	24.1798	23.739	23.9205	24.2468	24.3655	23.6417	24.4581	24.6488	24.4961	24.7737	24.1747	24.1681	23.6434	23.5212	24.535	24.0319	23.7397	23.9859	24.1516	23.8652	24.0774	24.1946	24.0621	24.0846	24.1688	24.3123	24.0559	23.9498	24.0666	24.1199	23.7432	23.9031	24.1526	23.6529
Q7Z7M0	MEGF8	Multiple epidermal growth factor-like domains protein 8	22.8538	23.1655	22.8273	22.7932	23.185	22.6082	22.3211	23.0744	23.196	22.9846	23.0626	22.8366	22.6572	23.0142	23.0346	23.0363	23.2115	23.2774	22.6817	23.1006	22.9217	22.9189	22.9686	23.0704	22.5005	22.683	22.7989	22.4558	23.0594	22.8545	23.0549	22.6792	22.9382	22.8921	23.0277	22.9173	22.9633	22.7651	23.1666	23.1549	23.1277	23.2121	22.8688	22.9534	22.9975	23.0401	23.3426
Q86U17	SERPINA11	Serpin A11	28.6155	28.5735	28.6619	28.4179	28.4376	28.5142	28.3794	28.4167	28.2068	28.3774	28.5148	28.3523	28.6198	28.5858	28.8285	28.7589	28.6667	28.7786	28.6004	28.6642	28.6629	28.5119	28.6992	28.6718	28.6163	28.5099	28.6894	28.4966	28.6627	28.4768	28.4228	28.4253	28.4946	28.3759	28.5413	28.4522	28.74	28.6124	28.5703	28.6388	28.6657	28.588	28.6463	28.7823	28.5955	28.5348	28.4665
Q86UX7	FERMT3	Fermitin family homolog 3	29.0045	28.7696	28.9295	28.92	28.9781	28.9382	28.9103	28.8162	28.8602	28.8361	28.7889	28.713	28.8321	28.8037	28.752	28.6666	28.8038	28.7843	28.7556	28.8256	28.8843	28.8224	28.8046	28.8405	28.7829	28.8037	28.7565	28.6821	28.8107	28.7341	28.6418	28.6403	28.7026	28.5988	28.7146	28.7043	28.7276	28.7542	28.7018	28.6661	28.7709	28.7872	28.7328	28.8359	28.5667	28.4625	28.6637
Q86VB7	CD163	Scavenger receptor cysteine-rich type 1 protein M130	24.21	24.0291	23.9936	24.0366	23.8534	23.85	24.6714	24.5825	25.416	24.7468	24.2254	24.1303	24.6478	24.2575	24.4616	24.244	24.2259	24.3141	24.0349	24.5571	24.9398	24.4686	24.0901	24.7449	23.9804	24.6337	25.04	24.6543	24.3025	24.6428	24.3246	24.2577	24.8614	24.5404	24.5075	24.6716	24.7095	24.5193	23.952	24.2702	24.8549	24.7603	25.0688	25.0641	24.6839	24.1671	24.8302
Q86YT9	JAML	Junctional adhesion molecule-like	20.0221	18.9831	19.7303	19.2027	19.6219	18.8994	19.4157	20.5393	18.7383	19.5632	19.8095	20.3862	19.383	19.5742	20.2975	19.314	18.6502	20.3199	20.3443	16.9011	19.9415	18.7212	20.3836	20.1765	20.5204	18.535	20.6168	18.8305	19.5875	20.4197	19.6811	18.9894	19.4707	19.321	20.2402	20.264	19.5352	19.5024	19.642	19.4041	19.9601	20.0094	19.065	19.9511	19.7817	19.8716	19.9193
Q8IXL6	FAM20C	Extracellular serine/threonine protein kinase FAM20C	22.6114	22.969	22.8865	22.7836	22.9111	22.672	22.8915	22.9296	22.9659	22.5374	22.563	22.5077	23.2967	23.0988	22.8495	22.7907	23.1038	22.9466	22.8014	23.1655	23.1165	23.1026	23.1574	23.2663	22.9241	23.2113	23.2015	22.8975	22.7566	23.3655	23.0659	22.9141	22.7765	23.0683	23.0534	22.9714	22.6746	22.2368	22.0611	22.5897	22.5588	22.2581	22.2557	22.2381	22.9956	22.5845	22.5594
Q8IZF2	ADGRF5	Adhesion G protein-coupled receptor F5	24.0097	24.0345	24.1851	24.0345	24.1543	24.2968	24.4292	24.0108	23.8746	24.0578	24.4976	24.393	23.8951	24.1687	24.1034	23.9906	24.4845	24.0899	24.0887	23.9705	24.1534	23.9745	24.1256	23.9128	24.3629	24.0805	24.0984	24.1197	23.947	24.017	24.1339	23.9372	23.8389	24.1913	24.1412	24.2319	24.0624	24.1703	24.4035	23.8932	23.9824	24.3686	24.0319	23.972	24.029	24.0364	23.9509
Q8N1N4	KRT78	Keratin, type II cytoskeletal 78	23.3549	22.2586	22.0309	21.8327	22.6303	22.1464	22.5411	22.1055	22.8705	22.2416	22.4885	21.8406	22.0864	22.4837	22.4374	22.4974	22.4795	22.3483	22.4498	21.759	22.0787	22.0657	22.1247	22.0509	22.6179	22.338	22.1928	22.6948	22.6827	22.5056	21.9955	22.4105	22.1988	21.9872	22.343	22.0597	22.4262	22.6619	22.298	22.2384	22.5668	22.6376	22.6805	22.7122	22.9469	22.2531	22.4966
Q8NBJ4	GOLM1	Golgi membrane protein 1	22.7463	22.8235	22.4155	22.9992	22.5687	22.9608	22.9212	22.9224	22.8134	23.0433	23.1265	22.6826	23.4101	23.124	23.0771	23.0239	23.3383	23.2149	23.0822	23.2068	23.2757	23.2214	23.3222	23.0872	22.9552	22.9418	22.7613	22.1643	22.8316	23.0208	22.7883	22.9266	22.7637	22.8805	22.9852	23.0271	22.7759	22.9341	22.9735	23.0865	22.8605	22.8012	22.524	22.7072	22.8721	22.7615	22.8649
Q8WZ75	ROBO4	Roundabout homolog 4	25.5382	25.6113	25.6915	25.8704	25.9344	25.6541	25.6424	25.429	25.562	25.7379	25.5378	25.5242	25.8058	25.8907	26.0841	26.039	25.8018	25.9768	25.9865	25.5788	25.618	25.9137	25.5146	26.0985	25.6895	25.9667	25.5422	25.6815	26.0392	25.933	25.8138	25.9246	25.9288	25.6147	25.7714	25.8731	26.1092	26.026	25.9568	25.9905	26.0081	25.9006	26.2432	25.991	25.9649	26.2134	26.1948
Q92496	CFHR4	Complement factor H-related protein 4	23.9772	23.985	23.8959	23.9954	23.9947	24.1209	24.0089	23.6385	23.7481	23.8974	23.5931	23.5018	23.9502	24.1912	24.0672	23.7531	23.8843	24.1758	24.3634	24.1652	23.7447	23.8218	23.4733	23.9491	23.2476	23.9286	23.789	24.0122	24.1027	23.4964	23.6546	24.1112	23.9725	24.0881	23.7359	24.1569	23.3982	23.779	23.2062	23.581	23.7488	23.8945	22.8747	22.5721	23.7166	23.822	23.3049
Q92520	FAM3C	Protein FAM3C	21.623	21.5949	21.5585	21.7016	22.182	22.4057	22.2553	22.1757	22.148	22.1411	21.992	22.2433	21.8879	22.4637	23.1532	22.3056	22.3085	22.9215	23.1149	22.3454	22.3378	22.3233	22.2578	22.3528	22.6308	21.9371	22.4749	21.8522	21.9726	23.2573	22.5256	21.751	22.3588	22.5098	21.901	22.51	22.4805	22.7576	22.5483	22.5617	22.479	22.5951	23.4044	22.5889	22.6752	22.6596	22.5302
Q92820	GGH	Gamma-glutamyl hydrolase	24.8932	25.5567	24.0378	24.4192	22.6168	25.7043	23.2105	23.2581	25.6003	25.9679	23.3193	25.7853	24.9476	25.0083	23.0249	23.3024	24.3649	24.8761	23.722	24.9428	24.8885	23.7334	23.1213	24.3232	23.7549	22.8374	23.5609	24.2634	25.1973	24.8103	25.251	25.0117	24.6618	24.8133	25.1196	24.976	25.1424	22.5309	24.3066	25.658	25.1572	24.9966	24.4208	24.6236	24.6094	24.785	24.776
Q92859	NEO1	Neogenin	23.6029	23.5183	23.4842	23.5226	23.4646	23.7402	23.4434	23.8353	23.5474	23.6548	23.7646	24.0531	23.573	23.4366	23.3911	23.4885	23.5238	23.4963	23.3154	23.1838	23.447	23.4249	23.4736	23.7312	23.5953	23.1763	23.38	23.6497	23.6077	23.4187	23.6234	23.6813	23.1635	23.5219	23.4671	23.5303	23.1292	23.0915	23.4499	23.3782	23.3022	23.3184	23.3568	23.1659	23.2957	23.2737	23.3359
Q92954	PRG4	Proteoglycan 4	23.7323	23.9427	23.7982	23.8351	23.6704	23.6423	23.6143	23.9462	23.6667	23.8949	23.5967	23.7624	23.7071	23.9595	23.8298	23.8551	23.692	23.9141	23.7801	23.7035	23.8623	23.7596	23.583	23.67	23.7015	23.9089	23.9294	23.8091	23.9298	23.971	23.8661	24.1325	23.9337	24.1838	23.9914	23.9084	23.6328	23.5748	23.671	23.8053	23.7527	23.7412	23.6281	23.8464	23.7418	23.7985	23.8308
Q96IY4	CPB2	Carboxypeptidase B2	22.0638	21.9588	21.799	22.1171	21.8095	21.9446	21.7192	21.751	21.8414	21.7449	21.8495	21.7046	22.271	22.4513	22.4258	22.2005	22.4592	22.4939	22.212	22.1491	22.2026	21.9169	22.2867	22.1987	22.5472	22.4899	22.5081	22.2492	22.5234	22.5642	22.3807	22.4234	22.3182	22.3527	22.4522	22.4827	23.0912	22.8715	22.6958	23.0304	23.007	23.0955	23.0381	22.9357	22.8612	22.9416	22.9294
Q96KN2	CNDP1	Beta-Ala-His dipeptidase	23.9411	24.006	23.8867	23.3179	23.8735	23.9535	23.8681	23.6983	23.9809	23.8578	24.0486	23.7833	24.2159	24.225	24.027	24.3211	24.2426	24.1737	24.1504	24.063	24.2754	24.069	24.306	24.3324	23.7215	23.8148	23.3321	23.6508	23.5647	23.5293	23.2281	23.3993	23.6375	23.5952	23.8445	23.4311	24.0135	23.8406	23.8435	23.7807	23.7122	23.6896	23.8072	23.817	23.8043	23.6971	23.88
Q96PD5	PGLYRP2	N-acetylmuramoyl-L-alanine amidase	25.3447	25.3804	25.4654	25.4917	25.4377	25.4167	25.2936	25.3891	25.3515	25.4142	25.3455	25.3581	25.1658	25.3157	25.2493	25.3503	25.3854	25.2846	25.1594	25.3766	25.3508	25.3536	25.3678	25.2715	25.182	25.5228	25.4348	25.4239	25.495	25.3283	25.3228	25.3749	25.3578	25.33	25.3754	25.3585	25.3622	25.2133	25.3871	25.3552	25.3189	25.2553	25.1647	25.3858	25.3877	25.3626	25.3716
Q96S96	PEBP4	Phosphatidylethanolamine-binding protein 4	24.2802	24.5665	24.0884	24.3772	24.1454	24.2523	23.9498	23.9289	23.7325	24.126	23.6359	23.6992	24.0306	24.123	24.7184	23.5801	23.7929	24.351	24.9669	23.7693	23.9545	23.6013	23.7368	23.7571	24.2202	24.1522	25.0165	24.4725	24.2547	24.577	23.772	23.4484	23.8482	23.7254	24.026	24.069	24.2934	24.3533	23.5566	23.9159	24.0438	23.9921	24.6449	23.872	23.7279	23.8155	23.6733
Q99784	OLFM1	Noelin	22.313	23.1379	23.0926	22.7857	24.2149	24.4078	24.0977	24.0221	24.433	24.1149	23.5079	23.9128	23.2221	23.9384	23.7644	23.4688	23.0646	24.0417	23.0577	23.9862	23.8628	23.7975	23.5888	24.0105	23.8322	23.5893	23.7971	23.6453	23.3704	23.8202	23.7824	23.4722	23.849	23.369	22.6436	23.6653	24.1069	24.1436	23.7974	24.1466	24.1992	23.9118	23.2171	23.7286	23.5831	23.4499	23.5746
Q99969	RARRES2	Retinoic acid receptor responder protein 2	22.9748	23.1273	23.249	22.8742	23.1788	22.8681	23.1213	23.0728	22.9261	24.0224	23.8884	23.0494	22.3286	22.5844	22.6775	22.4132	22.4912	22.8336	22.9303	22.4821	23.299	23.3751	22.3631	22.1676	22.3757	22.2183	22.8546	22.5437	22.7628	23.4682	22.6766	22.6467	22.6782	22.6726	22.5813	22.7241	22.7777	22.6346	22.5543	23.0653	22.7563	22.8891	22.1385	22.6072	22.1607	22.6099	22.6638
Q99972	MYOC	Myocilin	21.5821	21.7196	21.4125	21.1167	21.5271	21.4013	21.3806	21.3331	21.2804	21.2222	21.196	21.1942	20.3848	21.53	21.5187	21.5438	21.4735	20.7537	21.7498	21.6963	21.6562	21.5617	21.7287	20.7681	20.8159	20.447	20.8019	20.9914	20.7345	20.8424	20.866	21.3954	20.4157	20.9311	20.8526	20.6096	21.8916	21.7956	21.7397	21.5862	21.0325	21.9206	21.7849	21.713	21.5552	21.4639	21.7158
Q9BWP8	COLEC11	Collectin-11	19.3164	19.9096	19.5441	20.0805	20.2347	20.1681	19.7271	19.5673	19.9128	20.0125	19.9449	20.0227	19.4079	19.5585	19.7809	19.5903	19.2801	19.426	19.6583	19.0885	19.5214	19.6932	19.5611	19.3435	19.4136	19.2311	19.5112	19.3864	19.5337	18.9069	19.5513	19.1578	19.2853	19.734	19.6608	19.551	19.2565	19.7234	19.8781	20.1845	19.8445	20.085	19.6129	19.7173	19.8823	19.8673	19.573
Q9BXR6	CFHR5	Complement factor H-related protein 5	26.7215	26.9293	26.986	27.0742	26.9114	26.9294	26.9	26.6987	26.8421	26.9587	26.7228	26.7706	27.0425	26.9971	27.064	26.7253	26.82	26.9121	27.025	26.6768	26.6675	26.6106	26.7969	26.8114	26.9791	26.872	27.1242	26.9184	26.8309	26.842	26.7912	26.808	26.6991	26.6686	26.7921	26.7694	26.8075	26.8928	26.7261	26.7382	26.5409	26.654	27.0124	26.8963	26.7634	26.8622	26.8425
Q9H4A9	DPEP2	Dipeptidase 2	24.9111	24.6721	24.7384	24.6609	24.6827	24.7902	24.7234	24.6696	24.6318	24.6385	24.629	24.5136	24.4338	24.6832	24.4683	24.4624	24.5173	24.5612	24.4087	24.4018	24.5248	24.4891	24.6024	24.5941	24.7113	24.6116	22.1879	24.5714	24.6406	24.5048	24.4744	24.4429	24.6297	24.5128	24.5936	24.6343	23.7201	24.5184	24.6211	24.7293	24.6512	20.9926	24.5003	24.7134	24.6745	24.6717	24.6638
Q9HCL0	PCDH18	Protocadherin-18	28.746	28.6992	28.8057	28.9265	28.8302	28.7229	28.8128	28.7865	28.2533	28.8396	28.7729	28.7257	28.7096	28.7121	28.733	28.8826	28.9902	28.7021	28.6854	28.7751	28.8929	28.9485	28.8987	28.5824	29.2758	27.909	29.296	28.721	28.6782	28.6853	28.6645	28.6056	28.7211	28.3012	28.7964	28.6901	28.5762	28.5433	28.688	28.7257	28.4522	28.6094	28.5801	29.2032	28.0159	28.5862	29.2334
Q9HDC9	APMAP	Adipocyte plasma membrane-associated protein	27.6695	27.2943	26.9343	27.269	26.9381	27.3639	27.2776	27.4221	27.1399	27.3033	27.0566	26.9015	27.0759	26.8292	26.8608	26.724	26.5938	26.7905	26.8119	26.8219	26.9255	26.9542	26.8393	26.6195	27.2345	26.6346	27.5612	27.1642	27.5347	27.1972	27.2891	26.9298	27.2738	27.2766	27.2297	27.3586	27.045	27.3082	27.4267	26.8548	27.1417	27.0591	27.4816	27.4222	27.5339	27.3036	27.515
Q9NPH3	IL1RAP	Interleukin-1 receptor accessory protein	25.3576	25.3867	25.6071	25.4913	25.5649	25.5119	25.4482	25.5803	25.6588	25.6308	25.53	25.5084	25.2278	25.4449	24.9676	25.1587	25.451	25.2738	25.3323	25.4617	25.2342	25.378	25.3074	25.2578	25.1674	25.2537	25.4831	25.4448	25.4656	25.334	25.2637	25.3556	25.3711	25.5134	25.4388	25.3575	25.3877	25.0683	25.6345	25.2287	24.528	24.9611	25.1167	25.3038	25.0891	25.1629	25.3314
Q9NPR2	SEMA4B	Semaphorin-4B	29.0156	29.1618	29.1885	28.8777	29.0291	28.8995	28.8603	28.9578	28.8031	28.6697	28.9488	28.785	29.1286	29.1816	28.9801	29.2672	29.1674	28.9833	29.2433	28.8036	29.0685	29.1103	28.9689	28.9646	29.0623	29.0565	28.9989	29.1376	29.0374	29.134	29.2835	29.1689	29.0462	28.9054	29.1806	29.1048	29.0988	29.064	29.1922	29.3789	29.144	28.9367	28.9491	29.1793	29.097	29.2913	29.2185
Q9NPY3	CD93	Complement component C1q receptor	24.3581	24.1547	24.3619	24.8598	24.5343	24.8083	23.2926	24.2013	24.0248	24.7067	24.4024	23.906	24.0046	24.2054	24.2006	24.1159	24.1039	24.1761	24.0754	24.1267	24.008	24.6467	24.113	24.6514	24.0118	24.4349	23.6212	23.859	23.9473	23.6888	23.7413	23.6167	23.3347	23.7362	23.8471	23.4431	23.9906	24.0107	23.5597	24.0998	23.5863	23.8354	23.8272	24.3486	23.7105	23.8594	24.2941
Q9NQ79	CRTAC1	Cartilage acidic protein 1	22.3804	22.4938	22.3866	22.3499	22.4019	22.3859	22.5125	22.3589	22.4552	22.4882	22.6875	22.4543	22.0676	22.2728	22.2568	22.2039	22.2431	22.3806	22.2237	22.4536	22.2072	22.0798	22.3981	22.3501	22.1884	22.1014	21.9962	21.927	22.2662	21.9448	22.3253	22.1163	22.1889	22.2868	21.8879	21.9498	22.223	22.2753	22.4113	22.2707	22.4304	22.438	22.3212	22.4314	22.4385	22.3812	22.491
Q9NY97	B3GNT2	N-acetyllactosaminide beta-1,3-N-acetylglucosaminyltransferase 2	22.6816	22.5319	22.2125	22.4341	22.1434	22.4201	22.4386	22.1417	21.8877	22.1333	22.1402	21.9175	22.166	22.3471	22.5346	22.2737	22.3261	22.2719	22.4528	22.1521	22.0788	22.1433	22.1258	22.0832	21.7981	22.3984	21.9359	21.9057	22.0339	22.3157	22.0509	21.8689	21.4054	21.9234	21.8645	21.9297	23.7188	22.4579	22.4359	22.548	22.559	23.447	22.8998	23.099	22.7685	22.2042	23.0372
Q9NZ08	ERAP1	Endoplasmic reticulum aminopeptidase 1	24.1342	24.3203	24.0449	24.3087	24.3917	24.25	24.1649	24.0913	24.1715	24.1309	24.0887	24.3404	24.2001	23.8863	24.1041	24.2525	24.1105	24.2014	24.1246	24.0284	24.2367	24.1058	24.1178	24.1622	24.0918	23.8239	24.2627	24.2419	24.2609	24.014	24.2872	24.0653	24.1056	24.0983	24.1014	24.0664	23.9556	23.9978	24.2168	23.9895	24.1315	23.9396	24.2103	24.0414	24.5389	24.0262	24.1183
Q9NZK5	ADA2	Adenosine deaminase 2	25.2734	24.7195	25.1446	24.9403	25.0706	24.9777	25.0284	24.7332	24.6019	24.6783	25.236	24.694	25.1424	24.9362	25.4046	25.0194	24.8947	24.9049	24.9851	24.9325	24.8351	24.7454	25.2418	25.0557	25.3464	24.9401	25.3833	25.2031	25.2865	25.3648	25.0556	25.1082	24.9278	24.9326	24.9217	25.3793	25.3405	25.2874	25.1991	25.1463	24.9368	25.5377	25.1252	25.0358	25.4032	25.0207	24.8474
Q9NZP8	C1RL	Complement C1r subcomponent-like protein	21.601	21.6864	21.8942	21.7923	21.5648	21.7593	21.7051	21.5597	21.6266	21.8062	21.6687	21.5662	21.8964	20.9882	21.5444	21.6359	21.7811	21.4364	21.6369	21.5701	21.9822	21.7678	21.6804	21.5798	21.5169	21.4557	21.4745	21.4207	21.4557	21.5561	21.6123	21.89	21.497	21.4197	21.2744	21.1018	21.9646	21.809	21.8775	21.7241	21.6505	21.656	21.7216	21.6805	21.9875	21.9086	21.8877
Q9P232	CNTN3	Contactin-3	23.2094	23.2094	23.4162	23.7556	23.4577	23.5829	23.4157	23.2242	23.5737	23.2053	22.9357	23.2163	23.5686	23.2089	23.1926	23.0299	23.3845	23.275	23.3163	23.2371	23.2424	23.2229	23.2273	23.4397	23.1108	22.6663	23.1578	23.0748	23.1357	22.9336	22.9042	23.0397	23.01	23.0443	23.1011	22.809	22.7992	22.9636	23.4507	23.5231	23.0495	23.422	22.958	23.32	23.0546	23.2551	23.1534
Q9UBR2	CTSZ	Cathepsin Z	25.4323	25.0283	24.1309	25.4348	25.1666	24.5733	25.9471	25.5136	25.741	26.2371	25.2273	27.7131	24.1805	24.9293	25.271	24.7533	25.0369	24.8953	24.8832	25.5969	24.7944	24.8005	25.0126	24.9361	25.3506	25.0554	24.5375	25.4434	24.7234	24.5001	24.1116	25.2834	25.6643	24.9442	24.843	24.6468	24.766	24.3638	25.1757	24.8299	25.0321	26.5393	24.8132	24.9718	26.6956	24.7985	24.8688
Q9UGM5	FETUB	Fetuin-B	20.8446	20.8471	21.0157	20.9752	20.8608	20.8948	20.8509	20.9258	20.8166	20.8829	20.7273	20.7524	21.0603	21.071	21.054	21.1988	21.1633	21.2123	20.98	21.2498	21.0367	21.1904	21.107	21.1154	20.6254	20.6482	20.6809	20.6531	20.7624	20.6039	20.9096	20.9152	20.7897	20.9546	20.9286	20.7325	20.6891	20.5761	20.5034	20.7497	20.6076	20.4536	20.5893	20.5279	20.558	20.4705	20.621
Q9UHG3	PCYOX1	Prenylcysteine oxidase 1	28.38	28.2055	28.2518	27.8093	27.9636	28.3122	28.1816	28.0859	27.8218	28.2149	28.0534	28.2794	28.4896	28.1731	28.3328	28.3684	28.2454	28.363	28.1606	28.3621	28.3523	28.3222	28.2073	28.2421	28.4079	28.2414	28.2321	28.2113	28.4006	28.3516	28.378	28.351	28.3153	28.4054	28.4761	28.388	28.2815	28.4455	28.3482	28.4524	28.4613	28.3499	28.3445	28.3762	28.591	28.6068	28.535
Q9UIB8	CD84	SLAM family member 5	26.9528	26.8997	27.0655	27.0613	27.0871	27.1891	27.32	27.4592	27.2501	27.3034	27.2284	27.056	26.7532	26.9198	26.9459	27.1614	27.0874	27.1054	26.9362	27.2031	27.4284	27.4381	27.3894	27.3699	26.916	26.577	26.801	26.8879	26.9062	26.6503	26.6981	26.5881	26.8885	26.7731	26.7745	26.7767	27.291	27.1449	27.0989	26.9461	26.9634	27.0269	26.9821	27.002	27.0456	26.9481	27.0827
Q9UK55	SERPINA10	Protein Z-dependent protease inhibitor	27.1572	27.1757	26.9215	27.0608	26.9421	26.823	26.7893	26.8913	27.2711	26.8915	26.8657	27.0354	27.6283	27.6225	27.5999	27.6461	27.6794	27.6055	27.6793	27.6872	27.608	27.6003	27.5297	27.4961	27.2273	27.2119	27.0511	27.0707	27.208	27.3138	27.3658	27.2929	27.3194	27.1752	27.3194	27.3559	27.6182	27.4927	27.346	27.6085	27.4264	27.4727	27.1742	27.3843	27.4434	27.3876	27.2765
Q9ULI3	HEG1	Protein HEG homolog 1	25.1109	25.038	25.1069	25.0203	24.9497	25.0044	25.0687	24.8599	24.8761	25.0083	24.8156	25.0975	24.5413	24.469	24.755	24.5792	24.5896	24.8032	24.79	24.7054	24.5799	24.5495	24.3314	24.3036	24.6964	24.996	24.8628	24.9156	24.8331	24.6522	24.6788	24.6666	24.7629	24.7629	24.7333	24.8504	24.6027	24.3695	24.882	24.6087	24.7077	24.7678	24.8664	24.5179	24.6818	24.7149	24.7098
Q9UNN8	PROCR	Endothelial protein C receptor	20.8377	20.5398	20.7411	20.1554	20.4007	20.1804	20.2354	19.6192	20.2372	20.4121	19.9678	20.3806	20.9031	20.369	20.842	20.0469	20.8805	20.2838	20.5828	20.33	19.7938	20.2186	20.1653	20.1364	19.5124	19.9724	20.1346	19.0045	21.3338	20.1122	20.3568	19.8399	20.0352	19.9038	19.9657	19.8238	19.9796	19.9169	20.1473	19.874	21.0803	21.0762	20.1417	19.9582	20.519	19.9977	19.9993
Q9UNW1	MINPP1	Multiple inositol polyphosphate phosphatase 1	21.48	21.0906	21.3487	21.5148	22.4934	22.8855	20.4601	21.4587	22.5749	20.9183	21.4254	22.1156	21.5101	21.2038	20.7391	24.9904	21.3485	23.3707	22.0791	23.6985	21.8299	25.3249	22.4877	22.9297	21.4871	21.7369	21.4265	21.0828	22.0008	21.2443	21.5015	22.8659	21.0004	21.1244	21.7686	21.1113	21.1558	21.5681	21.9283	21.8991	21.3191	21.3407	21.369	21.2162	20.8848	21.4824	21.4348
Q9Y279	VSIG4	V-set and immunoglobulin domain-containing protein 4	22.8306	22.7144	22.7908	22.8658	22.6133	22.7828	23.1889	22.7987	23.205	22.8548	22.7935	22.6534	23.2587	23.2514	23.3199	23.1703	23.1956	23.2911	23.3581	23.0174	23.2671	23.2025	23.2922	23.1796	23.1459	22.9436	23.2774	22.7223	23.4088	23.1955	22.8143	23.3284	23.2924	22.6271	22.9244	23.301	22.5186	22.6469	22.7601	22.5937	22.4622	22.5824	22.8137	22.7238	22.882	22.4741	22.7059
Q9Y490	TLN1	Talin-1	28.7479	28.6384	28.6671	28.7528	28.7283	28.7003	28.6667	28.5006	28.5606	28.6274	28.6039	28.6666	28.6949	28.549	28.5812	28.6388	28.6734	28.5561	28.67	28.5973	28.6024	28.636	28.6949	28.6882	28.6939	28.5846	28.576	28.5723	28.7643	28.6375	28.6208	28.6646	28.6911	28.6114	28.6078	28.6302	28.4743	28.6187	28.7317	28.6469	28.6512	28.607	28.6146	28.7116	28.7351	28.72	28.6738
Q9Y4G6	TLN2	Talin-2	24.2821	24.6008	24.0857	24.5032	24.3671	24.4356	24.5284	24.2984	24.3647	24.4336	24.3389	24.5293	23.8529	23.7053	24.3767	23.5864	24.0306	24.3801	24.4908	23.8199	23.9801	23.4033	23.9014	23.888	24.3619	24.2187	25.2081	24.7986	24.5178	24.902	24.4552	24.505	24.4409	24.1627	24.4354	24.6195	23.6758	23.6645	24.2192	23.9985	24.1759	24.3632	25.0773	24.295	24.2856	24.234	24.1579
Q9Y4L1	HYOU1	Hypoxia up-regulated protein 1	23.7034	23.4794	22.5284	23.1057	23.3437	23.0323	22.8956	22.8584	22.8268	22.7901	22.9712	22.76	23.5105	22.7435	23.4962	23.1154	23.4016	23.3393	23.666	23.4926	23.5062	23.0428	23.1252	22.9719	23.488	23.5194	23.1294	23.3663	23.5064	23.2668	23.0658	23.18	23.0144	23.0699	23.0951	22.6334	22.4031	23.8777	23.2047	22.366	23.2989	23.736	22.7118	23.288	23.5609	23.3798	23.3336
Q9Y5C1	ANGPTL3	Angiopoietin-related protein 3	26.4934	26.2536	26.5253	26.4952	26.4084	26.5367	26.6284	26.7109	26.3539	26.7393	26.6427	25.7606	26.4012	26.384	26.3193	26.6515	26.4628	26.4053	26.0619	26.5528	26.1454	26.679	26.5307	25.6726	26.3669	26.406	26.4345	26.3007	26.4304	26.3102	26.3113	26.185	26.5918	26.591	26.3404	26.5547	26.1155	26.1864	26.523	26.7049	26.1834	26.1179	25.6588	26.2585	26.4037	26.1049	26.2319
Q9Y5Y7	LYVE1	Lymphatic vessel endothelial hyaluronic acid receptor 1	17.8807	17.724	18.0429	18.3617	18.2764	18.3705	18.2561	18.3557	18.3922	18.3747	18.0123	18.2049	17.8489	18.0265	18.2957	18.6312	18.3365	18.1657	18.5162	18.4841	18.3485	18.4017	18.3016	18.2883	17.7843	17.6684	18.1398	18.1576	17.9849	17.8269	17.5748	17.6837	17.9747	17.2986	17.6073	17.6236	16.8957	17.6952	18.0367	17.5443	17.8776	17.9596	18.0524	18.1965	18.3664	18.2716	18.1994
Q9Y646	CPQ	Carboxypeptidase Q	22.8199	23.115	23.1323	23.1647	23.4592	23.1065	23.2856	23.1852	22.9523	23.0416	23.3951	23.1648	23.3879	23.1194	22.8768	23.5857	23.4111	23.0597	23.3994	22.9687	22.9991	23.4051	23.4437	23.4718	23.5732	23.1103	23.6491	23.6457	23.6417	23.3678	23.0262	23.3477	22.8717	23.6201	23.6346	23.5359	23.0413	23.085	23.4482	23.477	23.1415	23.3588	23.0019	23.1031	23.8174	23.5406	23.062
Q9Y6R7	FCGBP	IgGFc-binding protein	26.5591	26.4922	26.6247	26.6192	26.6405	26.6363	26.4794	26.6764	26.676	26.6067	26.5584	26.5306	26.1347	26.294	26.0756	26.1494	26.1481	26.1852	26.1138	26.1705	26.2608	26.2767	26.1958	26.1729	26.3856	26.2386	26.3565	26.2659	26.4982	26.3642	26.3413	26.3471	26.3375	26.4178	26.432	26.4207	26.1245	26.2734	26.191	26.2366	26.3064	26.2141	26.1855	26.2823	26.2947	26.335	26.378
[truncated: 253 more columns]

## Sheet: Proteins Normalized Intensity
Protein.Group	Genes	First.Protein.Description	S01_A	S01_B	S01_C	S01_D	S01_E	S01_F	S01_G	S01_H	S01_I	S01_J	S01_K	S01_L	S02_A	S02_B	S02_C	S02_D	S02_E	S02_F	S02_G	S02_H	S02_I	S02_J	S02_K	S02_L	S03_A	S03_B	S03_C	S03_D	S03_E	S03_F	S03_G	S03_H	S03_I	S03_J	S03_K	S03_L	S04_A	S04_B	S04_C	S04_D	S04_E	S04_F	S04_G	S04_H	S04_I	S04_J	S04_K
A0A075B6H7	IGKV3-7	Probable non-functional immunoglobulin kappa variable 3-7	0	0.169741	0.10512	0.0860291	0.136038	0.110172	0	0.103094	-0.0200939	0.0952168	0.106134	0.0676498	0	0.0165195	-0.0247746	-0.089241	0.0781078	-0.0110626	0	0.122007	0.19618	0.0408096	0.246414	0.238361	0	0.0413761	0.0139408	0.0579338	0.0721741	-0.0857773	0	-0.0927277	-0.0215683	-0.0191746	0.0832539	0.0580082	0	0.321377	0.557518	0.474821	0.483053	0.382528	0	0.240788	0.165161	0.120571	0.209557
A0A075B6H9	IGLV4-69	Immunoglobulin lambda variable 4-69	0	-0.108038	-0.436544	-0.325222	0.0751247	0.0800972	0	0.512962	0.207188	0.721317	-0.0612507	0.0592632	0	-0.202206	-0.0848942	0.307356	-0.0760365	0.246128	0	-0.274979	-1.02162	-0.385315	-0.918978	-0.657595	0	-0.427862	0.473707	0.0263863	0.338726	0.319736	0	0.0195713	0.401987	0.0423126	0.185892	0.396452	0	-0.230156	-0.732491	-0.495852	-0.814503	-0.574026	0	0.379583	0.21525	0.28721	0.146534
A0A075B6J9	IGLV2-18	Immunoglobulin lambda variable 2-18	0	-0.054491	-0.231834	-1.86532	0.107496	0.445448	0	-1.14494	0.0369568	0.0557728	-1.08022	-0.200296	0	0.121233	0.262026	0.334028	0.233656	0.260441	0	0.0199413	-0.0554504	0.0091095	0.0199966	-0.0271282	0	-0.288887	-0.179567	0.050848	-0.130045	-0.211147	0	0.0793076	0.151457	0.0420246	0.0446033	-0.0604172	0	0.263697	0.159128	0.243919	0.186468	0.0903587	0	0.062418	0.211561	0.256012	0.152332
A0A075B6P5	IGKV2-28	Immunoglobulin kappa variable 2-28	0	0.12668	0.128803	0.303881	0.304834	0.252302	0	0.0492859	0.0447922	0.112759	0.124599	0.0718651	0	0.131239	0.197353	0.333933	0.46003	0.439816	0	-0.0297413	0.0579319	0.0725079	0.11731	0.178835	0	0.0440502	0.124157	0.140789	0.184198	-0.085001	0	-0.113588	-0.164764	-0.133753	-0.0962963	-0.0394592	0	0.353668	0.59824	0.504324	0.263773	0.435844	0	0.11215	0.270792	0.31286	0.14971
A0A075B6R2	IGHV4-4	Immunoglobulin heavy variable 4-4	0	0.0720043	0.0846424	-0.356915	0.0111675	0.175285	0	-0.476223	-0.438955	-0.103079	-0.505783	-0.6534	0	0.0251045	-0.0173378	-1.64018	-0.202217	0.127459	0	1.82189	1.83933	1.41813	1.39342	1.07275	0	-0.85681	-0.207161	-0.980597	-0.982847	-0.741682	0	-0.197838	-0.0542431	-0.244915	0.16939	0.704285	0	-0.353817	0.735947	0.476913	0.663021	-0.0441475	0	-1.29705	-1.30923	-1.85091	-1.153
A0A075B6S2	IGKV2D-29	Immunoglobulin kappa variable 2D-29	0	-0.0256939	-0.0537491	-0.0793381	-0.131214	-0.140795	0	-0.0501709	-0.230253	-0.139252	-0.106064	-0.263229	0	0.617521	0.514725	0.361174	0.376274	0.380476	0	-0.127895	-0.145691	-0.0379639	-0.21641	-0.0675354	0	-0.375853	-0.257986	-0.352192	-0.374836	-0.294479	0	-0.183998	-0.181034	-0.0764389	0.0744667	0.00898933	0	0.171022	0.0638027	0.166843	0.0559635	0.0963974	0	0.292305	-0.0313416	-0.0674515	0.182903
A0A075B6S5	IGKV1-27	Immunoglobulin kappa variable 1-27	0	0.00325966	-0.0189934	-0.0659237	-0.0557022	0.0396042	0	0.125656	-0.0932198	-0.0980587	-0.00450897	0.315065	0	-0.112974	-0.0291615	-0.234041	0.0210419	0.164471	0	-0.171001	-0.189798	-0.227152	-0.220623	0.115179	0	-0.138044	-0.0603104	-0.188698	0.0505314	-0.0734005	0	0.0089283	0.179226	0.04072	0.212301	0.195995	0	0.405699	0.317425	0.504923	0.462393	0.0747223	0	-0.08144	-0.211166	-0.111544	-0.140985
A0A087WSY6	IGKV3D-15	Immunoglobulin kappa variable 3D-15	0	-0.0123482	-0.144878	-0.210804	-0.210072	-0.247196	0	-0.119869	-0.46431	-0.128519	-0.116941	-0.21521	0	0.694445	0.594778	0.513458	0.553143	0.50185	0	0.00231552	-0.109121	-0.225847	-0.0776577	-0.192894	0	0.0533924	-0.00625038	-0.0314789	0.102127	0.0677319	0	-0.215696	-0.11223	-0.0641785	-0.0239754	0.0390301	0	1.42996	1.03161	1.09928	1.21946	1.33357	0	0.15901	-0.664488	-0.0611172	0.209839
A0A087WW87	IGKV2-40	Immunoglobulin kappa variable 2-40	0	0.578239	0.150616	-0.117262	-0.372936	-0.437122	0	-0.228994	-1.31613	-0.59026	-0.834391	-0.857208	0	-0.191505	-0.341234	-0.508982	0.0520039	-0.738033	0	-0.0838242	-0.173838	-0.675196	-0.200108	-0.109488	0	0.314602	0.52293	0.379639	0.649668	0.209494	0	0.717649	-0.0553684	0.766537	0.0343895	0.352121	0	0.325493	0.278992	0.373934	0.557981	0.337687	0	0.826525	1.37181	0.680597	0.296347
A0A0A0MS14	IGHV1-45	Immunoglobulin heavy variable 1-45	0	-0.0343838	-0.119032	-0.174391	-0.529394	-0.247747	0	-0.144943	-0.54711	-0.186995	-0.197348	-0.0547314	0	0.292027	0.334938	-0.11935	-0.326639	0.103861	0	-0.224234	-0.287592	-0.374813	-0.432129	-0.278917	0	-0.235899	-0.299286	-0.543015	-0.468273	0.0181046	0	0.0337639	-0.0454674	0.0328159	0.29796	0.0492897	0	0.250456	-0.678288	-0.0965519	0.262928	-0.362635	0	0.179907	-0.385052	-0.312584	0.0332394
A0A0A0MS15	IGHV3-49	Immunoglobulin heavy variable 3-49	0	0.0535526	0.0817127	-0.108795	-0.231552	-0.117525	0	-0.04813	-0.14222	-0.0136166	-0.0919495	-0.0414295	0	0.472803	0.536821	0.319052	0.60844	0.525024	0	-0.0201817	-0.205578	-0.0953846	-0.0812416	-0.127724	0	-0.1721	-0.0281601	-0.0904903	-0.0505943	0.029789	0	-0.111858	-0.239511	-0.153793	-0.111031	-0.114391	0	0.267681	0.175644	0.0865173	0.229881	0.164974	0	0.0825291	0.0452671	0.0807304	0.196724
A0A0A0MT36	IGKV6D-21	Immunoglobulin kappa variable 6D-21	0	0.165195	0.414389	0.125774	0.233467	-0.123741	0	-0.0580978	0.397295	-0.261948	-0.173445	0.153063	0	-0.252922	0.0517521	-0.294111	-0.134094	-0.221516	0	-0.41769	-0.579172	-0.149696	-0.484959	-0.358141	0	0.0449505	-0.22925	-0.153688	-0.108398	0.166775	0	-0.576281	-0.0143528	-0.024147	0.0300121	-0.0124607	0	-0.0638657	-0.513575	-0.338575	-0.712776	-0.0654659	0	-0.236069	-0.367628	-0.0625648	-0.232546
A0A0B4J1U7	IGHV6-1	Immunoglobulin heavy variable 6-1	0	0.234249	-0.143671	-0.0208817	0.0760822	-0.00540352	0	-0.0519676	-0.234129	-0.107357	-0.00880814	0.0903187	0	0.734604	1.05783	0.410063	0.628201	0.703781	0	-0.487789	-0.506208	-0.738773	-0.333492	-0.485613	0	0.153751	0.174242	-0.526287	0.0668755	-0.0530472	0	-0.105209	-0.403671	-0.768465	-0.284618	-0.257345	0	-0.038969	-0.203087	0.08465	0.162279	0.0831566	0	0.0464153	0.130157	-0.023901	0.236788
A0A0B4J1V0	IGHV3-15	Immunoglobulin heavy variable 3-15	0	0.156336	0.0896854	-0.0235138	0.0775585	0.107178	0	0.0823593	-0.0109158	0.0213718	0.0915833	0.0254555	0	0.0453129	0.0309925	0.0602798	0.108791	0.0472431	0	0.242403	0.182087	0.112768	0.189119	0.156836	0	-0.749701	-0.358891	0.0644836	0.14455	0.00364494	0	-0.0284176	-0.0986576	-0.0869064	-0.0419693	-0.0670567	0	0.263651	0.635775	0.650534	0.604309	0.360107	0	0.159235	0.219156	0.294476	0.0832024
A0A0B4J1V2	IGHV2-26	Immunoglobulin heavy variable 2-26	0	-0.0799637	-0.107796	0.148409	0.301243	0.0858307	0	-0.394917	-0.0148907	0.0841503	0.00424385	0.290186	0	-0.0417271	0.206963	0.405874	0.464771	0.579733	0	-0.552069	-0.201895	-0.685217	-0.391853	-0.229954	0	-0.677809	0.0775623	0.221626	0.301622	0.265436	0	-0.547062	-0.104109	-0.445107	-0.20731	0.0208397	0	0.323469	0.459011	0.209227	0.18364	0.021389	0	-0.0485058	-0.056366	-0.270758	-0.0123672
A0A0B4J1X5	IGHV3-74	Immunoglobulin heavy variable 3-74	0	-0.0444832	-0.104027	-0.171333	-0.151541	-0.099123	0	-0.0885963	-0.120668	-0.0906258	-0.134146	-0.172848	0	0.192394	0.189991	0.086647	0.152365	0.0506439	0	-0.0108013	-0.0908184	0.0508156	-0.102243	-0.0840282	0	-0.23358	-0.0309677	-0.201012	-0.0997391	0.0147724	0	0.135389	0.0735512	-0.415318	-0.0144157	-0.0233154	0	0.307119	0.196556	0.332905	0.404249	0.434565	0	0.105371	-0.0922604	-0.010973	0.106283
A0A0B4J1X8	IGHV3-43	Immunoglobulin heavy variable 3-43	0	0.328394	0.164057	0.212362	0.272934	-0.0719643	0	-0.0828247	0.00163651	-0.00750542	0.10673	0.0332699	0	-0.465279	0.10467	-0.441437	0.00955582	-0.484821	0	0.643875	0.432554	0.355917	0.332321	0.382626	0	-0.305387	-0.216274	-0.319328	-0.655663	-0.625704	0	-0.0669422	-0.0954475	-0.366119	-0.136728	-0.0669079	0	0.302937	-0.29294	-0.071291	0.186089	-0.167511	0	0.357454	0.0759335	-0.0939064	0.0967579
A0A0B4J1Y9	IGHV3-72	Immunoglobulin heavy variable 3-72	0	-0.032259	0.0488567	-0.0462666	-0.180599	-0.00331688	0	-0.271854	-0.287203	-0.221741	-0.198849	-0.204187	0	0.166748	0.0417995	-0.0574131	-0.00473023	0.00798035	0	-0.0313301	-0.0977726	-0.174858	-0.0913048	-0.0927296	0	-0.238388	-0.00552559	-0.209623	-0.113344	-0.00348663	0	-0.0262699	-0.147377	-0.163647	0.0736179	0.073	0	0.299704	-0.025528	0.197145	0.311882	0.23188	0	0.0359955	-0.0909004	-0.112879	0.215847
A0A0B4J2D9	IGKV1-13	Immunoglobulin kappa variable 1D-13	0	0.271988	0.240227	-0.133062	-0.373381	-0.163143	0	0.148071	-0.102108	-0.00471306	0.306578	0.0597954	0	0.150532	0.10206	-0.113541	0.107685	0.153009	0	-0.160944	-0.0905323	0.0610161	0.175999	0.14797	0	-0.0425911	0.0899105	-0.555548	-0.254066	-0.226448	0	0.194489	0.0531368	0.168089	0.298218	0.348785	0	-0.00104523	0.0581264	0.203926	0.51783	0.365829	0	0.161804	-0.176748	-0.28159	0.0638103
A0A0C4DH25	IGKV3D-20	Immunoglobulin kappa variable 3D-20	0	0.0450554	0.0691395	0.0774632	0.0623665	0.0607662	0	0.0790138	-0.147173	-0.030899	-0.0223179	-0.0992718	0	0.120384	0.0652542	-0.0175056	0.0752335	0.0615959	0	0.0361233	4.57764e-05	-0.0242672	0.00914955	0.0221443	0	0.306427	0.243269	-0.165188	0.180796	0.228062	0	0.104452	-0.0733299	-0.143293	0.0499039	-0.0473766	0	0.338217	0.450188	0.402323	0.349312	0.383797	0	0.181551	0.285625	0.23057	0.279842
A0A0C4DH30	IGHV3-16	Probable non-functional immunoglobulin heavy variable 3-16	0	-0.0958385	-0.0594521	-0.109512	-0.205164	-0.224455	0	-0.110216	-0.223299	0.024971	-0.110409	-0.0764713	0	-0.133522	-0.33959	-0.410788	-0.297646	-0.520473	0	-0.239803	-0.261564	-0.592213	-0.230598	-0.45225	0	-0.159103	-0.364994	-0.571846	-0.535387	-0.312193	0	0.00559044	-0.100119	-0.111153	0.0870914	-0.219833	0	0.165546	-0.114548	-0.075676	0.317543	-0.00745964	0	0.134605	-0.333261	-0.293917	-0.100296
A0A0C4DH34	IGHV4-28	Immunoglobulin heavy variable 4-28	0	0.214453	-9.53674e-05	0.174017	-0.00853157	0.0634689	0	-0.0337505	-0.222658	-0.0696049	-0.0784092	-0.180088	0	0.111147	0.0875778	-0.151321	-0.0112877	-0.125528	0	0.0730572	0.0579338	0.0873928	0.205263	-0.0111961	0	0.0194263	0.152225	-0.148354	-0.0743313	0.0210438	0	-0.161402	0.0373039	0.00574493	0.235361	0.193056	0	0.166004	-0.123339	-0.00934601	-0.0107689	0.0732155	0	0.130465	-0.169516	-0.0282726	0.042387
A0A0C4DH35	IGHV3-35	Probable non-functional immunoglobulin heavy variable 3-35	0	-0.159315	-0.137939	-0.240086	-0.435635	-0.482443	0	-0.124136	-0.348936	-0.0743828	-0.322332	-0.102329	0	0.269365	0.221478	-0.126572	0.0911999	0.0479259	0	0.00248528	-0.564899	-0.103573	-0.0200176	-0.152554	0	-0.175356	-0.199266	-0.500977	-0.363312	-0.00381279	0	-0.0310822	-0.00556374	-0.0533924	0.203133	0.0280933	0	0.0717201	-0.634945	-0.380955	0.157103	-0.245256	0	0.0646458	-0.672329	-0.544991	-0.00183296
A0A0C4DH36	IGHV3-38	Probable non-functional immunoglobulin heavy variable 3-38	0	-0.0654621	-0.00450134	-0.13674	-0.353664	-0.285849	0	0.0629139	-0.167969	-0.0998707	0.0252419	-0.0368176	0	0.0210552	0.00863266	0.0531273	-0.078167	0.185566	0	-0.16559	-0.259144	-0.158949	-0.231495	0.162176	0	-0.232687	-0.0451221	0.223978	-0.0170135	0.119589	0	-0.0590763	-0.13504	-0.177185	0.000312805	-0.0903721	0	0.173086	0.0658188	0.23938	0.279793	0.113207	0	0.167692	-0.04282	0.00586128	0.0288963
A0A0C4DH38	IGHV5-51	Immunoglobulin heavy variable 5-51	0	0.103724	0.125536	0.164614	0.0180302	-0.037775	0	-0.26366	-0.0807953	-0.0675278	0.00553703	-0.0876732	0	0.058012	-0.27416	-0.236729	-0.18338	-0.327185	0	-0.105026	-0.424738	-0.318064	-0.395517	-0.0901642	0	-0.119823	0.224934	-0.204861	-0.0472412	0.0353165	0	-0.20602	-0.293692	-0.487257	-0.218578	-0.0555973	0	0.168634	-0.0256805	0.0369778	0.00771904	0.100985	0	0.215378	-0.018549	0.104351	0.170876
A0A0C4DH43	IGHV2-70D	Immunoglobulin heavy variable 2-70D	0	0.169262	-0.117331	-0.00685883	-0.100254	-0.240568	0	-0.30649	-0.189188	-0.0651588	-0.226454	-0.0184879	0	0.565573	0.162695	0.334875	0.304222	0.530291	0	-0.0467072	-0.167683	0.0151043	0.0214596	-0.198812	0	0.0889664	-0.134251	-0.119652	-0.272814	-0.0831795	0	-0.101479	-0.0553932	-0.0575314	0.0642071	-0.0318165	0	0.109879	-0.134962	0.224916	-0.182867	0.319384	0	0.268978	0.0809765	0.0704803	0.223577
A0A0C4DH67	IGKV1-8	Immunoglobulin kappa variable 1-8	0	0.13394	0.447569	0.227474	0.0465164	0.218288	0	-0.133856	-0.149616	0.36957	0.0529747	0.201717	0	0.0993385	0.366171	0.159048	0.205917	0.318201	0	-0.199747	0.00487709	-0.0187492	-0.129568	-0.332846	0	0.153952	0.0945587	-0.101673	-0.159275	0.0118465	0	0.048048	-0.193575	-0.217253	-0.066534	-0.194021	0	0.234646	0.401997	0.391176	0.379	0.561934	0	0.448442	0.5424	0.616386	0.494854
A0A0C4DH68	IGKV2-24	Immunoglobulin kappa variable 2-24	0	-0.00902176	-0.0485535	-0.0799332	-0.224766	-0.122868	0	0.221769	0.0497665	0.148529	0.0729122	0.133106	0	-0.146852	-0.298414	0.0710869	0.104277	0.141935	0	0.310213	0.403955	0.427759	0.349686	0.3692	0	0.0188866	-0.158817	-0.117554	-0.0749207	-0.0772972	0	-0.14521	-0.124712	-0.0456581	0.11968	0.0257301	0	0.812899	0.769932	1.03167	0.902632	0.32255	0	0.00179291	-0.142954	-0.31686	-0.286299
A0A0C4DH72	IGKV1-6	Immunoglobulin kappa variable 1-6	0	0.0287056	0.0702114	-0.0657272	-0.0168304	-0.227858	0	-0.0610828	-0.195963	-0.0768566	-0.0548725	-0.0184307	0	0.342844	0.0694847	0.18432	0.190302	0.275572	0	0.168085	-0.0802097	0.0650787	0.0884151	0.112099	0	0.0170307	0.017292	-0.0238152	0.0593472	-0.0625896	0	-0.210405	0.0801849	0.0697651	0.0764389	0.241165	0	0.705498	0.188734	0.572029	0.752382	0.534292	0	-0.048933	-0.189411	-0.191273	-0.0432281
A0M8Q6	IGLC7	Immunoglobulin lambda constant 7	0	-0.0747337	0.00529099	-0.0260258	0.032135	-0.000642776	0	0.141266	0.00158882	0.0218735	0.09618	0.152882	0	0.250374	0.218084	0.26371	0.105478	0.139446	0	0.0757141	0.14249	0.139153	0.0852451	0.0667496	0	-0.223494	-0.0701504	-0.154173	0.0647964	-0.152225	0	0.082386	0.0958481	0.13427	0.154608	0.120123	0	-0.12298	0.0863152	0.310614	0.287025	-0.0127487	0	-0.0549431	0.106808	0.122993	0.124964
B9A064	IGLL5	Immunoglobulin lambda-like polypeptide 5	0	-0.149754	0.0404415	0.0940723	0.0294609	0.0264359	0	0.0491219	0.104031	0.0704708	0.0615578	0.0352516	0	0.242418	-0.0253048	0.108538	0.123163	0.170578	0	-0.0535145	0.0381031	-0.0564976	0.065258	0.072052	0	-0.0462685	0.0960236	0.0650139	0.168344	-0.0466003	0	0.120905	0.0419445	-0.0199833	-0.104422	0.0187798	0	0.268265	0.4659	0.374142	0.4084	0.276314	0	-0.0609417	0.160023	0.148161	0.0457211
O00151	PDLIM1	PDZ and LIM domain protein 1	0	-0.177082	-0.0745525	-0.237623	0.229006	-0.466042	0	-1.72503	-0.308582	-0.853586	-0.463282	-1.5268	0	-0.185442	-0.469206	-0.118237	-0.111225	-0.350111	0	0.042881	-0.242395	0.057148	-0.0181332	-1.61016	0	0.426764	0.624092	0.644819	0.709288	0.696594	0	0.151468	-0.606365	-0.138302	0.121792	0.18335	0	0.408548	1.05909	0.91206	-0.280628	0.849365	0	-0.120077	0.0284443	0.0251884	-0.146677
O00187	MASP2	Mannan-binding lectin serine protease 2	0	0.0211353	0.0637932	-0.141066	0.0699387	0.0165806	0	0.0109692	0.187634	0.0729351	-0.147541	-0.176977	0	-0.173145	0.129175	0.0231647	0.0398083	0.0227089	0	-0.297779	-0.289755	-0.317942	-0.305992	-0.384502	0	-0.169725	0.113916	0.261724	0.252453	0.0310116	0	-0.207884	0.0650787	0.0989227	-0.00131798	0.00808716	0	0.0252647	-0.0407524	0.00568008	-0.110779	0.200365	0	-0.00739098	-0.156317	-0.0684948	0.0599155
O00391	QSOX1	Sulfhydryl oxidase 1	0	0.0344105	0.0518703	0.099226	-0.0882282	-0.113466	0	-0.0559845	-0.0400753	-0.0668278	-0.108698	-0.156076	0	0.0635681	-0.13307	-0.0898228	-0.208334	-0.171268	0	-0.0332661	-0.177443	-0.211281	-0.102209	-0.0846539	0	-0.0129395	0.0764828	-0.0462437	0.151939	0.0711594	0	-0.0879936	0.0258713	0.0342255	0.0542564	0.069561	0	-0.0443745	-0.0923901	-0.0163136	-0.165327	-0.113548	0	-0.226494	-0.237125	0.0711441	0.0747147
O00533	CHL1	Neural cell adhesion molecule L1-like protein	0	-0.253166	0.167988	0.0584068	-0.0159588	-0.13925	0	0.198902	0.232164	0.0943527	0.00760078	0.0486145	0	0.195766	0.286566	0.405195	0.285631	0.524704	0	-0.129271	0.115362	0.117006	0.231188	0.243511	0	0.308468	0.345539	0.130503	0.227913	0.384842	0	0.286039	0.0387859	-0.135117	-0.131605	-0.245678	0	-0.0400047	-0.119198	-0.211538	-0.0883217	0.17729	0	0.0419636	0.25312	-0.105921	0.0750065
O14786	NRP1	Neuropilin-1	0	-0.521387	-0.432741	-0.110077	0.103745	-0.109896	0	0.0971451	0.333647	0.120792	0.137527	0.0529423	0	-0.323616	0.409517	-0.226177	0.0272999	0.0970821	0	-0.358929	0.00758934	-0.291292	-0.150888	-0.00211716	0	-0.0718727	-0.0287285	-0.433516	0.00392342	-0.0644131	0	0.0470619	-0.0327339	-0.117466	-0.23295	0.253456	0	-0.66367	0.13653	0.0447445	-0.0875549	-0.248749	0	0.147158	0.0125923	-0.124561	0.311838
O14791	APOL1	Apolipoprotein L1	0	-0.0309925	-0.0718002	-0.232121	-0.0986404	-0.0916348	0	-0.110466	-0.201015	-0.0813942	-0.144665	-0.151669	0	-0.0127888	-0.178719	-0.141874	-0.245825	-0.154459	0	-0.126331	-0.24337	-0.322306	-0.19249	-0.232889	0	-0.297613	-0.300137	-0.231884	-0.130962	-0.211596	0	0.00683594	-0.111378	-0.0266457	0.0935822	0.0984669	0	0.00897789	-0.0844345	0.0766487	0.0734253	-0.0388699	0	0.299191	0.273724	0.251457	0.23645
O15031	PLXNB2	Plexin-B2	0	0.112343	0.161692	-0.0227661	-0.00829315	0.248419	0	0.132769	0.136343	0.437756	0.308434	-0.130686	0	0.661163	0.596874	0.660046	0.651972	0.683447	0	0.112495	-0.0661526	-0.279236	-0.00564385	0.0213528	0	-0.83234	-0.306774	-0.0990868	0.191521	-0.270824	0	0.117994	0.307962	0.0943813	0.34339	-0.00388908	0	-0.263147	0.138327	0.277771	0.182512	0.201412	0	0.0785637	0.261637	0.276943	-0.209208
O15143	ARPC1B	Actin-related protein 2/3 complex subunit 1B	0	0.0985718	0.237648	0.197138	0.233574	0.213928	0	0.238546	0.150597	0.135561	0.142151	0.147676	0	0.228415	-0.35738	0.374922	-0.010313	0.227003	0	-0.17312	0.407665	-0.129559	0.510542	0.0910549	0	-0.577454	-0.602171	-0.181112	0.0707741	-0.313095	0	-0.239159	-0.0788116	0.055357	0.0613556	-0.060154	0	-0.048748	-0.0687294	-0.230141	-0.136848	-0.125834	0	-0.0500793	-0.0261078	0.0851002	-0.0670452
O15394	NCAM2	Neural cell adhesion molecule 2	0	0.15008	0.105827	-0.136465	-0.00443459	0.161739	0	-0.378765	0.212639	0.31798	0.203081	0.12195	0	-0.335697	0.0522499	-0.00495338	-0.0166225	-0.159012	0	-0.127726	-0.0888004	0.37648	-0.245111	0.308193	0	-0.350306	-0.179422	-0.142605	-0.0673409	-0.110346	0	-0.267813	0.131796	-0.154079	-0.174047	0.06287	0	0.147083	-2.46424	0.452724	0.125984	0.162207	0	0.0361977	-0.293848	0.159527	-0.376917
O15511	ARPC5	Actin-related protein 2/3 complex subunit 5	0	-0.374924	0.604668	-0.228575	0.0607243	0.706427	0	-0.025156	-0.50688	0.0284634	-0.062418	0.413393	0	-0.784176	-0.54459	-0.492521	-0.459568	-0.488873	0	-0.0718403	0.403158	0.366013	0.355618	0.314827	0	0.418312	0.0708122	-0.0890789	0.26161	0.17465	0	-0.711773	0.0309086	0.105288	0.0377502	0.227612	0	0.506592	-0.513929	-0.802395	0.0831814	0.198694	0	-0.116896	0.0735264	0.0208759	0.266665
O43157	PLXNB1	Plexin-B1	0	0.182262	0.0426044	0.130363	0.114878	0.0977478	0	-0.0331287	0.743345	0.0325737	0.091198	-0.00985718	0	0.191725	0.156736	0.329229	0.275297	0.168739	0	-0.348339	0.0497971	0.187866	-0.420414	-0.00439835	0	-0.488583	-0.0200367	0.186535	-0.175861	-0.637888	0	-0.275143	0.517424	0.110882	0.243328	0.354702	0	0.0880527	0.309464	-0.0524483	0.107038	0.464474	0	0.245392	0.20903	0.000640869	0.078968
O43505	B4GAT1	Beta-1,4-glucuronyltransferase 1	0	-0.349398	-0.0883789	-1.19952	-0.111147	-0.331118	0	0.018074	-0.226461	-0.635172	-0.846094	-0.858585	0	0.879705	0.816418	0.348539	0.669643	0.809792	0	-0.565792	-0.588478	-0.582668	-0.61866	-0.934494	0	0.0836201	0.510672	1.08082	0.96155	0.808355	0	-0.299135	-0.379667	-0.0497952	-0.772289	-0.506189	0	0.140415	-0.320774	-0.189325	-0.161955	-0.447184	0	-0.122461	-0.688555	-0.501799	-0.250677
O43866	CD5L	CD5 antigen-like	0	-0.00866127	0.0678139	0.0568333	-0.037571	-0.0186501	0	-0.0349045	-0.118343	-0.0687122	-0.0664062	-0.104872	0	0.52103	0.578812	0.53097	0.490591	0.54072	0	-0.288589	-0.299917	-0.249729	-0.213614	-0.242805	0	-0.160259	-0.0417042	-0.111834	-0.0606289	-0.0926304	0	-0.0553665	0.0161057	0.0111313	0.00410461	-0.000896454	0	0.463886	0.358824	0.380987	0.311811	0.387686	0	0.149912	0.181713	0.166906	0.14113
O60462	NRP2	Neuropilin-2	0	0.238646	0.139576	0.239704	-0.156904	-0.145172	0	0.0171146	-0.31146	-0.340479	-0.558607	-0.134747	0	-0.11149	-0.328527	-0.193369	-0.173086	-0.417662	0	0.246223	0.0312157	-0.245159	0.138481	0.0245514	0	0.334871	-0.0184078	-0.0713463	0.1791	0.0863686	0	0.0362854	0.0262012	-0.134834	0.231001	0.103392	0	-0.324947	-0.49621	-0.174501	-0.320484	-0.173285	0	0.147844	-0.436605	0.159895	0.127363
O75015	FCGR3B	Low affinity immunoglobulin gamma Fc region receptor III-B	0	-0.164162	0.0265579	-0.0454578	-0.240482	-0.0859737	0	0.13035	0.206787	0.0412617	0.201681	0.167595	0	0.02771	-0.0688515	-0.0896702	0.172367	0.0840034	0	0.0911198	0.0286293	0.224714	0.0894127	0.203987	0	0.437346	0.610107	0.625101	0.750427	0.548489	0	-0.106077	0.0250549	0.0486698	0.134623	-0.142988	0	0.0878086	0.288754	0.167389	-0.00160599	0.133179	0	-0.0737629	-0.0983105	-0.278164	-0.0215416
O75083	WDR1	WD repeat-containing protein 1	0	0.191187	0.165539	0.0286655	0.308836	0.357462	0	-0.12756	0.00142288	-0.162827	-0.244976	-0.366219	0	-0.521118	-0.199661	0.241503	0.362505	0.294134	0	0.0968437	0.188992	-0.000286102	0.0405483	-0.177395	0	0.118183	0.146313	0.261753	0.349609	0.176296	0	0.0817165	-0.155891	-0.143141	-0.225639	-0.150175	0	-0.435366	0.0676651	-0.0739708	-0.275602	-0.105799	0	0.172724	0.126894	0.206867	0.113111
O75223	GGCT	Gamma-glutamylcyclotransferase	0	0.235361	-0.420383	-0.164829	-0.191811	-0.406034	0	-0.071476	-0.0887108	0.0888672	-0.118145	-0.132805	0	0.134338	0.760088	-0.170641	0.0819092	0.538174	0	-1.05524	-1.07183	-1.13962	-1.01658	-1.02622	0	-0.0556946	0.778303	0.401497	0.148676	0.554707	0	-0.0646439	-0.0871506	-0.136812	-0.0424728	0.116396	0	0.130972	-0.918558	-0.459457	-0.366842	-0.250521	0	-0.690279	-1.03905	-0.87945	-0.884066
O75636	FCN3	Ficolin-3	0	-0.0606804	-0.0138664	-0.316235	-0.320953	-0.177696	0	-0.156286	-0.339334	0.0705471	-0.239956	-0.204153	0	0.0409756	0.135181	-0.00267601	0.0193405	0.260246	0	-0.0884228	0.0458641	-0.188847	0.0300694	0.0064621	0	-0.0937977	-0.0710354	-0.309965	-0.0493088	-0.0872078	0	-0.0187263	0.153614	0.221334	0.213026	0.102165	0	0.0645332	-0.0224991	0.0087719	0.00651932	0.129894	0	0.202892	0.205748	0.233852	0.182274
O75882	ATRN	Attractin	0	0.0258942	0.0660839	0.0738258	-0.0526333	-0.120975	0	-0.151171	-0.118219	-0.0516472	-0.0477829	-0.119917	0	0.130617	-0.0252972	-0.088913	-0.0648594	-0.190641	0	0.108078	0.0962143	-0.0524292	0.0314217	0.0174904	0	-0.0434151	-0.186708	-0.199368	-0.0348721	-0.148008	0	-0.0618572	-0.118628	-0.0801258	0.054327	-0.0030632	0	0.239311	-0.0430183	0.0590401	0.245417	-0.0326672	0	0.173519	0.0292931	0.0358009	0.1807
O94985	CLSTN1	Calsyntenin-1	0	-0.357344	0.119757	0.113056	-0.172495	-0.0842094	0	-0.171503	0.236214	0.0950336	-0.13513	-0.0408001	0	0.447985	0.435017	0.076395	0.409504	0.448641	0	0.0528908	0.0454903	-0.0604095	-0.130774	-0.239889	0	-0.0976963	-0.312525	-0.236506	-0.111273	-0.157595	0	-0.227955	0.168495	-0.0998268	-0.0258312	-0.0437622	0	-0.332493	-0.0273209	0.235336	0.0628395	0.0884762	0	-0.118235	-0.030159	-0.249329	-0.201925
O95445	APOM	Apolipoprotein M	0	-0.0642433	-0.0282001	-0.0361919	-0.227287	-0.325251	0	-0.14057	-0.161842	-0.036602	-0.142662	-0.0431957	0	0.117321	0.0302258	-0.0773659	-0.0282726	-0.0781479	0	0.119864	0.165419	0.0419884	-0.0863647	0.0739212	0	-0.126427	-0.336651	-0.498619	-0.267424	-0.217007	0	-0.00226402	0.00827599	-0.0585728	0.0457115	0.104467	0	0.0198631	-0.309811	-0.17061	-0.227484	-0.263531	0	0.211145	0.00694275	0.076189	0.0296593
O95479	H6PD	GDH/6PGL endoplasmic bifunctional protein	0	-0.0325279	0.324602	0.0312939	0.0953979	0.0669117	0	-0.122438	-0.029623	0.0692787	-0.133078	-0.171633	0	0.0657177	0.126158	0.433867	0.141258	-0.253109	0	0.168198	-0.208466	0.000297546	-0.136284	0.0270386	0	-0.224018	-0.896317	-0.846924	-0.294819	-0.736536	0	0.29199	-0.194704	0.292999	0.152126	-0.166994	0	0.0514278	0.261023	0.0874214	-0.333401	-1.14136	0	-0.927881	-0.975914	-0.890238	-1.20468
O95497	VNN1	Pantetheinase	0	-0.509012	-0.414917	-0.700798	-0.957989	-0.659573	0	0.0534344	0.239082	0.0552597	-0.0154915	0.126348	0	-0.179661	-0.148243	-0.82346	-0.267717	-0.47526	0	-0.126677	-0.110321	0.0854549	-0.154221	-0.135695	0	0.35495	0.288673	-0.277512	0.0535583	0.180183	0	-0.0408192	0.0244637	0.0935287	-0.0971832	0.335339	0	-0.542585	-1.07816	-0.238129	0.0589676	-0.583265	0	0.195736	0.155611	0.100344	0.386314
O95810	CAVIN2	Caveolae-associated protein 2	0	0.281414	0.0869637	0.34668	0.243006	0.505194	0	0.139015	0.029789	0.0907936	-0.0277691	-0.171917	0	-0.214645	0.0175209	-0.0078125	-0.211628	-0.298756	0	0.0379276	0.204828	0.0423298	0.0421124	0.0971699	0	-0.734081	-0.0312252	0.283808	0.157253	0.0705433	0	-0.0434704	0.216606	0.0345726	0.00844765	0.207224	0	-1.52893	0.0813446	-0.40712	-1.90267	-0.754549	0	-0.304312	0.0930252	-0.173939	0.269987
P00338	LDHA	L-lactate dehydrogenase A chain	0	-1.33919	-1.15423	-1.13411	-0.391815	-1.02439	0	0.0795765	0.69529	0.0946884	0.224653	-0.168406	0	-0.456411	-0.213972	0.283859	-0.155333	0.361763	0	-0.530504	-0.692568	-0.737989	-1.04194	-0.827578	0	0.257339	0.20957	-0.232668	0.168613	0.0361462	0	0.145754	-0.01437	-0.302725	-0.188501	-0.426012	0	1.30953	1.05326	0.500122	0.991077	1.64207	0	-0.688105	-0.23114	-0.0201454	-0.00313568
P00450	CP	Ceruloplasmin	0	-0.0342617	0.0659046	0.0500774	0.0167618	0.0448322	0	-0.0846024	-0.0935688	-0.0900669	-0.103251	-0.0611095	0	-0.0168991	-0.0717125	0.00329781	0.023201	-0.0606575	0	0.0328655	0.0511208	0.0479298	0.0512352	0.0177479	0	-0.138317	-0.142248	-0.108534	-0.0335617	-0.143366	0	-0.0863113	-0.0926514	-0.0949516	-0.107014	-0.110594	0	-0.0648537	0.134796	0.10364	0.027319	0.0588627	0	0.0575314	0.192194	0.186342	0.129627
P00488	F13A1	Coagulation factor XIII A chain	0	-0.119793	0.122232	-0.0289307	0.15299	0.127676	0	0.0371037	0.0684395	0.104994	0.0693016	-0.00497436	0	-0.0352345	0.437452	-0.137911	-0.0522041	0.159573	0	-0.590546	-0.337965	-0.37591	-0.523897	-0.409466	0	0.00780487	0.406679	0.0307884	0.067524	0.300262	0	0.201651	0.280865	0.0937595	0.242064	0.168646	0	0.634008	0.226337	0.159037	0.174345	0.23105	0	-0.423889	-0.433945	-0.559792	-0.481985
P00533	EGFR	Epidermal growth factor receptor	0	0.125935	-0.120886	-0.522316	-0.256178	-0.150301	0	0.0950489	-0.626097	0.0340137	0.01227	-0.0125122	0	0.790258	-0.502096	0.413841	-0.0260639	0.437313	0	0.0181999	-0.252796	0.312614	0.357344	0.337843	0	0.216948	-0.681589	-1.08128	0.439939	0.29631	0	-0.277781	-0.9839	0.83667	-0.809343	0.310577	0	0.329496	0.423532	0.336752	0.677509	0.527035	0	0.608864	0.285297	-0.0548325	0.631418
P00558	PGK1	Phosphoglycerate kinase 1	0	0.0846329	-0.0703259	0.0766754	0.15484	0.0974884	0	-0.0409737	0.0334682	0.0859241	0.0285797	0.0624676	0	-0.381193	-0.224831	-0.0330029	0.0169582	-0.138502	0	0.282782	-0.0902634	0.210951	-0.333893	-0.0743217	0	-0.233803	0.132668	0.105391	0.153704	-0.396158	0	0.0936832	0.0189514	-0.0490284	0.0428047	-0.0672913	0	-0.182711	-0.70059	-0.545837	-0.759792	-0.6315	0	0.168119	0.0438137	0.0967789	0.217764
P00734	F2	Prothrombin	0	0.00133133	0.0159397	-0.0936069	-0.0564137	0.0126877	0	0.0263786	-0.0674496	0.000839233	-0.00135994	-0.0294037	0	0.00119591	-0.0556774	-0.0659618	-0.0130539	-0.0833225	0	0.11619	0.148212	0.0917835	0.140217	0.123474	0	-0.145481	-0.160175	-0.131725	-0.0134945	-0.134949	0	-0.0205116	-0.0122356	-0.0428982	0.029892	0.0378151	0	-0.0589428	0.0834789	0.0723972	0.040638	0.0230694	0	0.155743	0.198938	0.185209	0.183214
P00736	C1R	Complement C1r subcomponent	0	0.0332527	0.104074	0.0225182	0.0527897	0.170311	0	-0.0504227	-0.0734959	-0.121737	-0.139175	-0.0495205	0	0.146746	0.0906677	0.0243454	0.0406971	0.187778	0	0.0203686	-0.0663223	-0.0673447	-0.0202389	-0.0113449	0	-0.249683	-0.167746	-0.174088	-0.0729218	-0.046175	0	-0.0501194	-0.0494213	-0.0892677	-0.0825081	-0.0138474	0	0.0331707	0.0302067	0.0202274	-0.0175953	0.138756	0	-0.00841522	-0.000526428	-0.0250244	-0.0394497
P00738	HP	Haptoglobin	0	0.441811	0.504269	0.476547	0.466841	0.751198	0	0.0292816	-0.224909	-0.0266628	-0.120474	-0.0474072	0	-0.519661	-0.645967	-0.496506	-0.546402	-0.506891	0	0.155712	0.108885	0.132868	0.121675	0.216442	0	0.106705	0.0928459	0.228008	0.278297	0.260946	0	0.0903683	-0.00144768	0.0360203	0.011734	0.0716839	0	-3.34088	-3.52415	-3.52007	-3.61851	-1.28924	0	0.888546	0.246628	0.852837	0.83853
P00739	HPR	Haptoglobin-related protein	0	0.182245	0.227642	0.26309	0.223286	0.201773	0	-0.00136185	-0.0302849	-0.0723	-0.0638752	-0.0796242	0	-0.286627	-0.32527	-0.292202	-0.251053	-0.276125	0	0.0313034	0.105368	0.251652	0.223328	0.141434	0	-0.238659	-0.203754	-0.119696	-0.0435658	-0.187269	0	-0.138474	-0.0645103	-0.0390511	-0.0535049	-0.0629616	0	0.196457	0.330801	0.345493	0.228014	0.148632	0	0.43339	0.261656	0.324804	0.119099
P00740	F9	Coagulation factor IX	0	-0.100794	-0.226547	-0.0822029	-0.238337	-0.0805149	0	0.175243	0.241518	0.12112	0.103445	0.24852	0	0.116396	0.095705	0.109022	0.225452	0.147093	0	-0.0217266	-0.137707	-0.211403	-0.137524	-0.0336208	0	0.2208	0.239124	0.0832462	0.340054	0.401346	0	-0.20038	-0.113443	-0.271936	0.108208	-0.0461559	0	-0.257378	-0.448116	-0.235771	-0.0641422	-0.100576	0	0.116091	-0.0337944	0.136742	0.179405
P00742	F10	Coagulation factor X	0	-0.0857601	0.115429	0.0838642	-0.0577946	0.106133	0	0.0269566	-0.381678	0.170906	-0.0251694	0.19022	0	-0.0214577	-0.11969	-0.209131	-0.0391884	-0.00822449	0	-0.091589	-0.259512	-0.0949955	-0.185884	0.0666542	0	-0.0659065	-0.179546	-0.108044	0.0586281	-0.126909	0	0.0776386	0.131224	0.149857	0.195864	0.110868	0	0.225424	-0.00151062	0.128944	0.107557	0.0505505	0	-0.0336838	-0.0324039	-0.0404739	0.0472221
P00746	CFD	Complement factor D	0	0.0247307	-0.0239487	-0.340805	-0.168768	-0.020195	0	0.396774	0.306005	0.409281	-0.0650635	0.787113	0	-0.0446358	-0.107519	-0.437405	-0.143234	-0.126881	0	0.136292	0.00775337	0.0211086	-0.0754204	-0.2122	0	0.290413	-0.251705	-0.0105343	-0.326576	0.219604	0	-0.218275	0.0237331	-0.00821877	0.00447655	0.0863094	0	-0.277271	-0.845234	-0.0152264	-0.135927	-0.0654888	0	0.271879	-0.0647907	0.0826378	-0.123224
P00747	PLG	Plasminogen	0	0.176987	0.0386372	0.0226097	0.038353	0.00169945	0	0.0063591	-0.073616	0.00451469	-0.0711994	-0.0454979	0	0.0737228	0.362854	-0.119331	-0.120544	0.198042	0	-0.441574	-0.462259	-0.453959	-0.442244	-0.396753	0	-0.270325	0.577145	0.0493546	-0.068243	0.419292	0	-0.0660629	-0.0360813	-0.0339718	0.0193729	0.034647	0	0.0973072	-0.170507	-0.102966	-0.14711	-0.254921	0	-0.441666	-0.52239	-0.528801	-0.495413
P00748	F12	Coagulation factor XII	0	-0.104542	-0.0458374	-0.116161	-0.198421	-0.129345	0	-0.0302715	0.0257645	-0.0215607	-0.0403328	-0.0730667	0	0.0609703	0.128197	-0.0490417	-0.0196857	0.0695095	0	-0.183168	-0.299496	-0.200048	-0.325974	-0.204884	0	-0.125795	0.282351	0.0190754	0.0533524	0.234138	0	0.0265293	-0.0387268	-0.0196972	0.0604897	0.094326	0	0.0662136	0.0165482	-0.0164127	0.00504684	-0.0509644	0	-0.226557	-0.143599	-0.141842	-0.174232
P00751	CFB	Complement factor B	0	-0.00703621	0.041954	0.0467815	0.0814228	0.0885639	0	-0.07728	-0.0889282	-0.0935402	-0.143169	0.0207443	0	-0.201042	-0.312069	-0.202461	-0.211063	-0.283239	0	0.145466	0.157614	0.194799	0.15168	0.163218	0	-0.13298	-0.166945	-0.101793	-0.0296249	-0.0603848	0	-0.0647526	-0.0888691	-0.0616512	-0.0606861	-0.0179729	0	-0.162649	-0.0156441	-0.0757675	-0.0645046	0.0383396	0	-0.0756054	-0.0338249	0.00157547	-0.0724773
P00915	CA1	Carbonic anhydrase 1	0	-0.817274	-1.00965	-1.07102	-0.773518	-1.19244	0	-0.0092144	0.256866	-0.124971	0.493418	0.574852	0	-0.123024	-0.0617638	0.211514	-0.0413742	-0.0228481	0	-0.0497417	-0.0136108	-0.041378	0.00226021	-0.122753	0	-0.356335	-0.109694	-0.480703	-0.0511074	-0.290808	0	0.0315075	0.284595	-0.215681	-0.298784	-0.199911	0	0.225294	-0.210684	-0.209019	0.0430603	-0.305351	0	0.0937595	0.594631	0.136948	-0.0208969
P00918	CA2	Carbonic anhydrase 2	0	-0.344353	-0.377224	-0.408243	-0.359873	-0.276426	0	-0.0482597	-0.0973377	0.159189	0.318422	0.416487	0	0.0926647	0.911184	0.0623646	-0.102222	0.50485	0	-0.778122	-1.00004	-0.856653	-1.01689	-1.03558	0	-0.118759	0.903814	-0.251904	-0.18539	0.736187	0	-0.0299053	0.029604	-0.0437565	0.021143	0.0162659	0	-0.0915127	-0.233118	-1.29362	-0.282808	-0.0677872	0	-0.636303	-0.58997	-1.10239	-0.968275
P01008	SERPINC1	Antithrombin-III	0	-0.0149708	-0.00345802	0.0138226	-0.0374584	-0.00617027	0	-0.00917053	-0.0359688	0.0151081	-0.0300789	0.00554276	0	0.0799389	-0.0171089	0.0114002	0.0617714	0.0671043	0	0.158205	0.083189	0.0872383	0.100584	0.0808659	0	-0.0260201	-0.0598888	-0.0337543	0.0232029	-0.0348282	0	0.012331	-0.0136204	-0.0453548	0.0148067	0.0120621	0	-0.0896454	0.0394039	0.054369	-0.010231	0.0643444	0	0.125153	0.234161	0.253057	0.204468
P01009	SERPINA1	Alpha-1-antitrypsin	0	-0.203205	0.065506	0.0595055	-0.0332775	0.0877762	0	0.112097	0.257023	0.125633	0.132107	0.191525	0	-0.0956535	-0.453909	-0.0176582	-0.0704689	-0.183784	0	0.261404	0.251974	0.344971	0.352488	0.313349	0	0.0661983	-0.168554	0.0313644	0.0952282	-0.163231	0	-0.0374355	0.00653839	0.0231838	-0.0730038	-0.0575466	0	-0.115482	0.260872	0.136112	0.0811596	0.161781	0	0.016674	0.0777721	0.0811024	0.0812187
P01011	SERPINA3	Alpha-1-antichymotrypsin	0	-0.0489044	0.0280571	0.0400524	0.0247669	0.0207329	0	-0.0503368	-0.10103	-0.0678959	-0.047226	-0.0217953	0	-0.274641	-0.254131	-0.306549	-0.171503	-0.290068	0	-0.0256767	-0.0740318	-0.0868645	-0.0103264	-0.0544891	0	0.0202141	0.0490093	-0.0264435	0.0443974	0.0589104	0	-0.109324	-0.134624	-0.163675	-0.0875015	-0.0969334	0	0.0985107	0.210091	0.308786	0.232365	0.280525	0	-0.0819798	-0.0528049	-0.073185	-0.0742912
P01019	AGT	Angiotensinogen	0	-0.123562	-0.17177	-0.0949936	-0.195135	-0.0681305	0	-0.0325184	-0.11323	-0.0551624	-0.0057354	-0.12183	0	0.197542	0.183748	-0.0308418	0.152559	0.0832157	0	0.0369301	0.0112534	-0.102232	-0.0951958	-0.162315	0	0.340967	0.345722	0.289757	0.318962	0.270138	0	-0.0431747	-0.0795708	-0.267715	-0.115929	-0.127714	0	-0.159613	-0.202044	-0.119957	-0.101906	-0.197811	0	0.160303	0.0548668	0.105255	0.069891
P01023	A2M	Alpha-2-macroglobulin	0	0.0213604	0.0485096	0.05966	0.0213413	-0.000305176	0	-0.0333252	-0.0548534	-0.0297832	-0.0358601	-0.0323086	0	0.187038	0.100716	0.101648	0.138346	0.101099	0	0.0422974	0.0617199	0.0330753	0.0469208	0.0582466	0	-0.0162258	-0.106524	-0.132984	-0.0446548	-0.0706558	0	-0.0202694	-0.107542	-0.144575	-0.0303307	-0.0797806	0	0.197111	0.246967	0.31991	0.272629	0.237225	0	0.108734	0.0793591	0.0594807	0.0681877
P01024	C3	Complement C3	0	-0.0482483	-0.0613708	-0.088871	-0.0882053	-0.0502739	0	-0.092226	-0.192051	-0.0932293	-0.10454	-0.0743027	0	-0.088932	-0.107765	-0.171244	-0.130966	-0.150309	0	0.0258846	0.033432	-0.00903511	0.0220852	0.0319023	0	-0.0700703	-0.0714417	-0.131247	-0.0439644	-0.00853539	0	0.0189991	-0.0418644	-0.0420952	0.0151501	0.0134602	0	-0.0597038	-0.0043335	0.0080471	-0.0133343	0.0711403	0	-0.00365067	-0.0247746	-0.0228291	-0.023798
P01031	C5	Complement C5	0	-0.00797653	-0.0564556	-0.0525208	-0.0831165	-0.0141258	0	-0.0220318	-0.127457	-0.0866508	-0.0840607	-0.0668354	0	0.0146713	0.101122	-0.140524	-0.0652199	0.0445843	0	-0.139778	-0.200125	-0.248745	-0.144669	-0.165939	0	-0.1716	0.0523415	-0.0990295	-0.0532761	0.0873833	0	-0.101145	-0.105988	-0.097641	0.00343323	0.0331211	0	0.016016	-0.116035	-0.0722675	-0.035284	0.0250816	0	-0.192123	-0.250771	-0.189541	-0.205378
P01033	TIMP1	Metalloproteinase inhibitor 1	0	0.0905113	-0.250898	0.100405	0.199194	0.246813	0	0.473742	1.06582	0.863647	0.0783195	1.00668	0	-0.461554	-0.531816	-0.501429	-0.472456	-0.0520096	0	-0.240234	0.10084	0.612593	0.190582	0.204773	0	-0.531088	-0.427412	-0.170872	-0.270586	0.128103	0	-0.577112	0.0626431	-0.802126	-0.0571098	0.214512	0	-0.384218	0.152319	0.245405	-0.322344	-0.223299	0	-0.225544	0.79797	0.634762	0.0853615
P01034	CST3	Cystatin-C	0	0.238735	0.172396	0.200474	-0.00915146	0.00939941	0	0.158062	0.0494328	0.0679398	0.0814686	0.135204	0	0.0104065	-0.0424805	0.00923347	0.0431366	-0.144714	0	0.1089	0.00553513	0.0523796	-0.0413742	-0.062582	0	-0.00330353	-0.0207996	-0.0955296	0.00270844	-0.100113	0	0.020607	0.0306168	0.0393314	0.19433	0.109419	0	0.188969	0.294912	0.361382	0.246969	0.170399	0	-0.0478039	-0.126165	0.0328732	0.119959
P01042	KNG1	Kininogen-1	0	-0.0803986	0.049015	-0.018446	-0.0250492	0.0923252	0	0.0418682	-0.010334	0.0291824	-0.0365753	0.0370655	0	0.0591469	-0.00774383	0.17095	0.144882	0.0645599	0	0.0875549	0.126568	0.137627	0.0742741	0.0841503	0	-0.128679	-0.0608654	0.0143623	0.0761433	-0.0811749	0	-0.0623169	-0.0947075	-0.0704937	-0.0905132	-0.118305	0	-0.100525	0.0293922	-0.0079689	-0.109587	0.0399475	0	0.13619	0.241001	0.212509	0.135475
P01344	IGF2	Insulin-like growth factor II	0	-0.0469074	0.105686	-0.0535545	-0.307228	-0.046072	0	0.0153599	0.066824	-0.0941944	-0.0542812	0.132689	0	0.132238	-0.0208282	0.0913792	-0.00992012	0.0930767	0	0.179207	0.306623	0.342155	0.17808	0.309401	0	-0.0970802	-0.180122	-0.213213	0.0189819	-0.0872231	0	-0.0316372	0.00257683	0.0586071	-0.0738697	-0.0609779	0	-0.368898	-0.38648	-0.281824	-0.238514	-0.243771	0	-0.310896	0.0756664	0.0332317	0.0599403
P01591	JCHAIN	Immunoglobulin J chain	0	-0.00407982	0.062664	0.0300465	0.034729	0.0481491	0	0.0383587	0.119907	0.145082	-0.0501099	-0.0795307	0	0.160141	0.209866	0.19252	0.242228	0.149546	0	0.0853748	-0.0595646	0.0309162	0.0904713	0.0826759	0	0.169039	-0.0410957	0.19593	0.0362072	0.0948639	0	-0.0202618	-0.189058	-0.195511	-0.312046	-0.223333	0	0.245417	0.153383	0.273647	0.298557	0.282412	0	0.190788	0.159561	0.1889	0.101677
P01593	IGKV1-33	Immunoglobulin kappa variable 1D-33	0	0.12034	0.0326862	-0.0969086	-0.193703	-0.0811386	0	0.00371933	-0.239632	-0.0478668	0.158712	0.0693378	0	-0.183023	-0.0449371	-0.476221	-0.300026	-0.555517	0	0.265299	0.107239	-0.0940323	0.430727	-0.0198593	0	-0.138361	-0.116827	-0.172165	-0.080864	-0.14533	0	0.00414467	0.152689	0.26247	0.346634	0.226482	0	0.284452	0.0429363	0.177176	0.0931149	0.11594	0	0.107868	0.295422	0.242428	0.251171
P01597	IGKV1-39	Immunoglobulin kappa variable 1-39	0	0.0698948	0.0751839	0.135534	0.122545	0.209139	0	0.0384007	-0.251055	-0.00333404	-0.0653496	-0.0362034	0	0.0220013	-0.029829	-0.0393353	0.132154	0.0381165	0	-0.000360489	0.0757389	0.0669441	0.0393429	0.102102	0	-0.0897675	0.0246792	0.00423622	0.112892	-0.156687	0	-0.034132	-0.172382	-0.222042	-0.282604	-0.0547504	0	0.159534	0.353767	0.406055	0.347382	0.437157	0	-0.0618153	-0.262609	0.155649	-0.0541286
P01601	IGKV1D-16	Immunoglobulin kappa variable 1D-16	0	-0.0531845	-0.343573	-0.213461	-0.264685	-0.101603	0	0.169939	0.0174694	0.150532	0.346931	0.145725	0	-0.123449	-0.143509	-0.13835	-0.0284405	-0.0418873	0	-0.246229	-0.208244	-0.138512	-0.100687	-0.131376	0	-0.237928	-0.0236893	-0.170794	-0.130337	-0.0252628	0	-0.135597	-0.264767	-0.0942726	-0.0899734	-0.09762	0	0.32745	0.329981	0.238657	0.216286	0.107338	0	0.0334282	0.221159	0.197458	0.148737
P01602	IGKV1-5	Immunoglobulin kappa variable 1-5	0	0.277784	0.0766315	0.111418	0.065155	0.0942802	0	-0.0428085	-0.33604	0.0106468	0.116951	-0.0392342	0	0.2917	0.142025	0.0392418	0.28298	0.306656	0	-0.283098	-0.154478	-0.277514	-0.0868454	-0.175978	0	-0.32098	-0.111626	-0.291046	0.047863	-0.0592003	0	-0.117252	-0.0899162	-0.00952148	0.0677147	0.0651035	0	0.421494	0.314642	0.374569	0.598869	0.504005	0	0.194405	0.188595	-0.0880966	0.113733
P01619	IGKV3-20	Immunoglobulin kappa variable 3-20	0	0.283634	0.0931759	0.00285339	-0.100872	-0.191214	0	-0.0506439	-0.422962	-0.0529079	-0.104673	-0.30451	0	0.138166	0.198494	-0.31127	-0.0400696	0.00259209	0	-0.156706	-0.194473	-0.331673	-0.161573	-0.177525	0	-0.0104103	0.0134506	-0.283951	-0.0908318	0.135834	0	-0.161175	-0.0831509	-0.0801373	0.248751	0.180698	0	-0.0240955	0.0274601	0.252501	0.276951	0.140902	0	0.0965443	-0.155228	-0.187138	0.301857
P01700	IGLV1-47	Immunoglobulin lambda variable 1-47	0	0.0371113	0.0915451	0.293785	0.372015	0.370495	0	0.00663757	-0.0472889	0.0157433	-0.230618	-0.263882	0	0.399935	0.0528049	0.448328	0.217495	0.397947	0	-0.286983	-0.146267	-0.168957	-0.136152	-0.178017	0	-0.00707054	0.328527	0.317804	0.0127811	-0.0186996	0	0.0680485	0.133911	0.102089	0.298855	0.194351	0	0.545795	0.415846	0.400751	-0.143578	0.438931	0	-0.450268	0.227598	-0.210531	-0.218317
P01701	IGLV1-51	Immunoglobulin lambda variable 1-51	0	-0.22863	-0.0375118	-0.724581	-0.00856018	0.00384331	0	0.273508	-0.222944	0.0661926	-0.0635853	0.0756741	0	0.145458	0.156805	0.101538	-0.0118027	0.134661	0	-0.00650215	-0.016695	-0.0127983	-0.0929222	0.00324059	0	-0.456249	-0.0443268	-0.0562267	-0.204838	-0.131132	0	0.310619	0.42923	-0.217434	0.320698	0.385717	0	0.125994	0.244616	0.29756	0.329983	0.306118	0	0.0669231	-0.0161743	0.0243282	-0.0386066
P01703	IGLV1-40	Immunoglobulin lambda variable 1-40	0	0.164019	0.467751	0.424419	0.594854	0.316139	0	-0.10725	-0.0623512	-0.0768433	-0.442677	-0.200197	0	-0.110384	-0.0695457	0.445442	0.473883	0.278662	0	0.127733	0.206697	0.0343056	0.0333004	-0.0949764	0	-0.0447559	0.164553	0.536257	0.185194	0.0222931	0	-0.039938	-0.0500107	0.0972767	-0.0389824	0.00882912	0	0.447155	0.45923	0.640762	0.418129	0.542139	0	-0.614573	0.266783	0.554953	0.0750313
P01706	IGLV2-11	Immunoglobulin lambda variable 2-11	0	-0.00170898	0.116722	0.00548363	0.121351	0.0652046	0	0.0357742	0.227987	0.212729	0.181858	0.521957	0	0.183462	0.359701	-0.0176735	0.378763	0.20505	0	-0.136925	0.184326	0.178362	-0.184975	0.202208	0	-0.0161629	-0.00808334	0.245281	0.240559	0.0984917	0	0.223799	-0.452873	0.225887	0.218901	0.144398	0	-0.354822	-0.0614796	0.717899	0.570032	0.0244846	0	0.147995	-0.165287	0.473616	-0.18722
P01714	IGLV3-19	Immunoglobulin lambda variable 3-19	0	-0.00654411	0.244219	0.0828991	0.24811	0.20599	0	-0.116701	-0.0817432	-0.209745	0.00797272	-0.0781345	0	0.455946	0.481972	0.469753	0.492756	0.516266	0	-0.0858383	-0.0921402	-0.124817	-0.112268	-0.103867	0	-0.397394	-0.0818329	-0.0315094	-0.000665665	-0.0401497	0	-0.22254	-0.114773	-0.0486088	-0.0283699	-0.0377388	0	0.292412	0.273605	0.383736	0.308416	0.267519	0	0.0870934	0.0137386	0.00643349	0.0787945
P01715	IGLV3-1	Immunoglobulin lambda variable 3-1	0	0.132862	0.547569	0.0679379	0.0481033	0.158371	0	0.277727	0.32151	-0.0059433	0.300385	-0.168064	0	0.333509	0.278515	0.297718	0.283346	0.190172	0	-0.293465	-0.254705	-0.331249	-0.440844	-0.420036	0	0.268175	-0.000318527	-0.00956726	-0.196337	0.201263	0	0.0161591	-0.429775	0.00102997	-0.381907	-0.0400238	0	0.0578804	0.212868	0.398153	-0.153278	0.297409	0	0.107327	0.166054	0.109657	0.190548
P01717	IGLV3-25	Immunoglobulin lambda variable 3-25	0	-0.08148	0.00129509	-0.0717106	-0.074791	-0.234535	0	-0.0305138	0.00396156	0.0544777	0.109398	0.143225	0	0.320965	0.378384	0.217749	0.261475	0.360052	0	-0.321392	-0.343079	-0.330091	-0.388777	-0.353907	0	-0.260788	0.170679	-0.197817	-0.192825	0.0679035	0	-0.113585	0.0292225	-0.136076	-0.0704231	-0.0176392	0	0.222025	0.116199	0.251436	0.35347	0.380392	0	0.138721	0.0996933	0.0220413	0.169878
P01742	IGHV1-69	Immunoglobulin heavy variable 1-69	0	-0.0785904	-0.0489922	-0.248964	-0.474445	-0.502752	0	-0.103243	-0.16152	-0.106363	-0.141479	-0.123646	0	0.294325	0.251125	-0.00889015	-0.019577	0.1576	0	-0.230558	-0.117975	-0.0121536	-0.212265	-0.15383	0	-0.0118008	-0.0721569	-0.114548	-0.00122261	0.0353069	0	-0.065712	-0.0166931	-0.477165	-0.0994473	-0.0779991	0	0.316282	-0.0812206	0.155695	0.377396	0.0808868	0	0.117243	-0.126749	-0.103603	0.115608
P01766	IGHV3-13	Immunoglobulin heavy variable 3-13	0	-0.268948	0.0107517	0.0528641	0.202761	0.151245	0	-0.00613594	0.111916	0.0577545	0.0645046	0.185938	0	0.035696	-0.101351	0.0397625	-0.00130081	-0.250977	0	0.0383091	0.158278	0.174309	0.240826	0.219492	0	-0.0857105	-0.00180054	0.0774097	0.018034	-0.439466	0	-0.251709	-0.115643	-0.154791	-0.0953007	-0.0847874	0	0.0463295	0.585621	-0.0436764	0.237677	0.279043	0	0.155809	-0.280687	-0.0563965	0.238161
P01768	IGHV3-30	Immunoglobulin heavy variable 3-30	0	-0.0408096	-0.0647449	-0.25135	-0.213636	-0.192123	0	-0.0227814	-0.144236	0.0332928	-0.202429	-0.128252	0	0.0359077	0.0810852	-0.223858	-0.0817852	-0.0588627	0	-0.0986519	-0.12216	-0.185968	-0.128538	-0.234295	0	-0.207188	-0.268711	-0.379589	-0.216003	-0.106504	0	-0.0206432	-0.219345	-0.269691	-0.0289993	-0.0778046	0	0.295441	0.0289307	0.206739	0.432676	0.231228	0	0.0360184	-0.162251	-0.172537	0.0476189
P01780	IGHV3-7	Immunoglobulin heavy variable 3-7	0	-0.0106544	0.0240002	-0.0219631	-0.190426	-0.126354	0	-0.0888367	-0.191933	-0.0308743	-0.0399742	-0.0200329	0	0.391851	0.413961	0.283964	0.417154	0.351849	0	0.0242176	-0.0334167	-0.133163	-0.031208	-0.0388222	0	-0.242443	-0.0659485	-0.0572815	-0.0521049	-0.0187969	0	-0.146172	-0.162926	-0.182528	0.00481987	-0.0856018	0	0.327179	0.14381	0.24082	0.439058	0.263338	0	0.00399017	-0.0960999	-0.149961	0.0799732
P01782	IGHV3-43D	Immunoglobulin heavy variable 3-9	0	0.0418377	0.0978775	0.0453358	-0.149099	-0.120605	0	-0.0942497	-0.140219	0.146313	-0.0529442	0.0357819	0	-0.234083	-0.121254	-0.177347	-0.0571404	-0.228569	0	-0.160992	0.0203495	-0.0863628	-0.305328	-0.0379276	0	-0.129534	-0.14226	-0.182484	-0.0884991	-0.151392	0	0.07831	-0.0190735	-0.151539	0.0139465	0.00103569	0	0.281731	0.120684	0.276859	0.409542	0.246271	0	0.146669	-0.0104599	-0.140635	-0.00959015
P01817	IGHV2-5	Immunoglobulin heavy variable 2-5	0	0.758123	0.0337086	0.590288	0.204662	0.833164	0	0.165344	-0.100456	0.164471	-0.165754	0.59956	0	-1.07344	-0.574747	-2.15941	-1.40675	-0.616417	0	-0.819752	-0.584366	-0.327177	-0.207764	-1.58901	0	0.220827	0.365419	0.20133	0.180515	0.279181	0	1.26961	0.513178	-0.234026	-0.0476856	-0.294905	0	1.04873	0.540449	1.15726	1.45716	0.566622	0	0.0153275	0.961815	-0.0245953	0.867031
P01834	IGKC	Immunoglobulin kappa constant	0	0.0825729	0.123652	0.184093	0.235207	0.104147	0	0.0253754	0.091013	0.0389843	0.0211964	0.0245094	0	0.0626888	0.0244179	0.0998573	0.113876	0.094574	0	-0.0154457	0.0118122	0.0256004	0.0101128	0.0225124	0	-0.0517807	-0.0672569	-0.186121	-0.0186939	-0.130156	0	0.0242672	0.118603	0.0926819	0.0878468	0.056284	0	0.305777	0.539202	0.484785	0.41931	0.24584	0	0.103336	0.26589	0.235868	0.208496
P01857	IGHG1	Immunoglobulin heavy constant gamma 1	0	-0.0229187	-0.0305214	-0.00986671	-0.0481529	-0.0396137	0	0.0197678	0.0643921	0.0952244	0.0416908	0.0436916	0	0.133125	0.163755	0.160666	0.145119	0.141895	0	-0.00880051	0.0281391	-0.00329971	0.0185947	0.00222588	0	-0.00627899	0.0221729	-0.0206375	0.0448742	0.0138264	0	-0.065527	-0.0453911	-0.039278	-0.0052166	-0.00479698	0	0.236788	0.494164	0.435944	0.311159	0.283491	0	0.111179	0.225828	0.198984	0.104259
P01859	IGHG2	Immunoglobulin heavy constant gamma 2	0	0.0108109	0.0224018	0.0578117	0.0296173	0.0230427	0	-0.00315666	0.00884056	0.0394554	0.0598412	0.0286446	0	0.216118	0.151844	0.126425	0.119375	0.138748	0	0.0194263	0.0313053	-0.00586891	0.0334072	0.00251007	0	0.0205746	0.0515957	0.0537109	0.0326443	0.0364513	0	-0.000659943	0.000457764	-0.0510921	-0.0158539	-0.0811844	0	0.272116	0.539392	0.457409	0.439571	0.292181	0	0.199423	0.267721	0.281254	0.234568
P01860	IGHG3	Immunoglobulin heavy constant gamma 3	0	-0.150652	-0.0607681	-0.0294361	-0.0303383	-0.00442886	0	0.0240269	0.0146542	-0.0133057	-0.0013485	-0.0341454	0	-0.0767918	-0.088789	-0.0997295	-0.100597	-0.0455303	0	-0.299728	-0.321709	-0.311968	-0.319166	-0.325075	0	-0.447071	0.0371323	-0.063921	0.228735	-0.0353413	0	-0.00393867	0.0233364	0.0459404	0.0204239	0.145088	0	0.37505	0.448011	0.40423	0.424685	0.434437	0	-0.0886631	-0.0346546	-0.140947	-0.0195808
P01861	IGHG4	Immunoglobulin heavy constant gamma 4	0	-0.111641	0.0197792	0.0292473	-0.0670509	0.0652237	0	0.0617256	0.085495	0.121756	0.0828362	-0.0779114	0	-0.197058	-0.540062	-0.108789	-0.338278	-0.418777	0	-0.0699615	-0.0100269	0.0502243	-0.0149536	-0.0908756	0	-0.461206	0.00892067	0.22471	0.36743	-0.0488319	0	-0.0479183	-0.132792	0.105167	-0.236649	-0.14502	0	0.468132	0.585083	0.661749	0.358675	0.491962	0	0.40267	0.518028	0.673538	0.445175
P01871	IGHM	Immunoglobulin heavy constant mu	0	0.0195446	0.114021	0.0552177	0.0181236	0.0479355	0	-0.000900269	-0.0361233	0.0204735	-0.017168	0.0279007	0	0.646769	0.726709	0.655083	0.581915	0.646063	0	-0.24848	-0.265287	-0.221874	-0.266802	-0.296209	0	-0.144028	-0.145569	-0.123104	-0.0762463	-0.235256	0	0.0411701	-0.0335007	-0.0101357	0.0289917	-0.0353127	0	0.4004	0.470634	0.465977	0.445047	0.458637	0	0.170807	0.17997	0.187475	0.171217
P01876	IGHA1	Immunoglobulin heavy constant alpha 1	0	-0.0629063	0.0251999	-0.0380058	-0.015028	-0.0169353	0	0.0350647	0.0111408	-0.0302906	0.0100174	0.033041	0	0.0375519	-0.0321484	0.0735531	0.105627	0.0492249	0	0.217659	0.316778	0.298491	0.307455	0.330051	0	-0.0960026	-0.0998249	-0.0326996	-0.0164528	-0.128036	0	0.0889359	-0.00690651	-0.0730839	-0.0325947	-0.0381622	0	0.131416	0.397861	0.29953	0.312296	0.343309	0	0.148226	0.0938892	0.0441017	0.0745373
P01877	IGHA2	Immunoglobulin heavy constant alpha 2	0	0.0335541	0.0908222	0.0477924	0.115658	0.0545044	0	-0.0868511	0.0530891	-0.188171	-0.179417	0.121214	0	-0.0918961	-0.27718	-0.0881538	0.0926456	0.0952587	0	0.3048	0.248091	0.352434	0.237843	0.450825	0	0.0187035	-0.0518589	-0.105965	-0.142504	-0.268469	0	0.143984	-0.107224	-0.249321	-0.274521	-0.175549	0	-0.320772	0.799925	0.53684	0.512445	0.636217	0	0.290558	0.151461	-0.0383968	0.0898952
P01880	IGHD	Immunoglobulin heavy constant delta	0	-0.026104	-0.148046	0.00207138	-0.0164986	-0.028801	0	0.0200138	0.0602131	-0.0977268	0.0195866	-0.114061	0	-0.113424	-0.420912	-0.392122	-0.275316	-0.27981	0	0.532026	0.563726	0.617002	0.590395	0.595835	0	-0.142565	-0.0650463	-0.137671	0.0138302	-0.18932	0	-0.267179	-0.171486	-0.182919	0.00583458	-0.156761	0	-0.110359	-0.0805569	-0.200094	-0.209385	-0.164356	0	-0.0565758	0.129032	0.105387	0.0321045
P01889	HLA-B	HLA class I histocompatibility antigen, B alpha chain	0	-0.00538254	-0.25778	-0.531858	-0.0233765	-0.0160084	0	-0.247118	-0.219671	0.168985	-0.22514	-0.0628662	0	-0.133957	0.457449	-0.050272	-0.187122	0.388384	0	-0.988846	-0.920889	-1.12362	-0.973869	-0.971502	0	0.668314	0.298714	0.365803	0.0406208	0.428724	0	0.303694	-0.00811005	0.144295	-0.449854	0.286108	0	0.300406	0.165573	-0.00788116	0.276209	-0.0250111	0	-0.65456	-0.268356	-0.654686	-0.444153
P02144	MB	Myoglobin	0	0.0690556	0.0121231	0.112093	0.0890503	0.0727463	0	0.112585	0.225897	0.08745	0.101553	-0.0128193	0	0.173923	0.0683975	-0.189774	0.196112	0.13353	0	0.289862	0.303816	0.371346	0.324289	-0.0252266	0	-0.383228	0.256594	-0.0236397	0.093338	-0.170706	0	0.279209	0.523714	0.366447	0.227722	0.517124	0	0.0956249	0.260822	0.251072	0.122789	0.283091	0	0.12558	-0.263105	0.0283279	-0.0220089
P02452	COL1A1	Collagen alpha-1(I) chain	0	-0.0700283	0.139671	0.143427	0.111776	0.0558472	0	-0.203159	-0.211473	-0.124807	-0.0872555	-0.178438	0	-0.102196	-0.355774	-0.0958614	0.0414658	-0.331568	0	0.268682	0.236536	0.288176	0.279192	0.17337	0	0.109219	-0.00784874	0.093729	0.169922	0.110109	0	-0.0308228	-0.166687	-0.109961	-0.135523	-0.150297	0	-0.137457	-0.2624	-0.109671	-0.221987	-0.366915	0	-0.122635	-0.00217247	-0.0726871	-0.0714016
P02533	KRT14	Keratin, type I cytoskeletal 14	0	-0.192043	-0.0475521	0.121313	-0.0242023	-0.191525	0	-0.0382633	0.123259	0.0294266	0.0856037	0.118048	0	-0.191952	-0.201391	0.0859146	-0.0048027	-0.119238	0	0.187796	0.140638	-0.342272	0.157568	0.211088	0	0.169088	0.121271	0.18767	0.215904	0.125256	0	-0.0665169	-0.0263939	0.0308208	-0.142239	-0.0269432	0	0.0523491	0.00359535	0.32523	0.107395	0.247341	0	-0.0609741	0.2945	0.139206	-0.195744
P02538	KRT6A	Keratin, type II cytoskeletal 6A	0	0.0480785	-0.47121	0.296478	0.261488	-0.235044	0	0.105391	0.675856	0.505274	0.282419	0.330912	0	-1.8409	-1.92355	-2.32274	-1.82966	-1.85344	0	0.0330219	0.0809002	-0.0340729	0.120365	0.178782	0	-0.226131	0.171619	-0.209417	-0.0674171	-0.171535	0	0.0716057	0.276649	0.296818	0.159786	0.282236	0	-0.417484	0.142365	0.747038	-0.0332527	-0.156866	0	-0.00852585	0.224749	0.106857	-0.0854454
P02647	APOA1	Apolipoprotein A-I	0	-0.00775909	0.0639877	0.0366364	0.0475845	0.107983	0	0.0420322	-0.0251427	-0.0135021	0.0352077	0.0467148	0	0.218298	0.113739	0.232489	0.272398	0.234833	0	0.189789	0.211843	0.22109	0.22921	0.214867	0	0.0498028	0.0836334	0.0742416	0.192301	0.102432	0	0.0510044	-0.00173569	-0.0348911	-0.0232182	0.00832558	0	-0.0591888	0.186695	0.114651	0.0392094	0.076889	0	0.145924	0.16923	0.217798	0.140848
P02649	APOE	Apolipoprotein E	0	-0.103357	-0.30014	-0.386272	-0.458525	-0.394892	0	-0.151472	-0.338835	-0.109734	-0.103321	-0.105421	0	-0.427067	-0.313	-0.630342	-0.490576	-0.226791	0	-0.00162506	-0.116478	-0.141407	-0.0142136	-0.014246	0	-0.582716	-0.553324	-0.729992	-0.472147	-0.282621	0	0.0374374	0.0835934	0.0667171	0.393589	0.283428	0	-0.349937	-0.857075	-0.455534	-0.140392	-0.646427	0	0.0969849	-0.435856	-0.425583	0.000886917
P02652	APOA2	Apolipoprotein A-II	0	-0.263128	0.101336	0.0910912	0.0993042	-0.0409355	0	0.115816	0.0278339	0.0543365	-0.0176105	0.00845337	0	0.167398	0.133699	0.356026	0.250158	0.299601	0	0.0195408	0.154781	0.110992	0.290056	0.253208	0	0.0396519	0.0233612	0.00388908	-0.0108891	-0.0450783	0	0.147823	0.137264	-0.0854893	-0.05093	0.0803757	0	-0.422998	0.0233555	0.0319118	-0.190443	0.0444355	0	0.120659	0.139317	-0.00939178	-0.00154495
P02654	APOC1	Apolipoprotein C-I	0	0.0889206	-0.368288	-0.523031	-0.283785	0.118	0	0.0719738	-0.663836	-0.255905	-0.0659409	0.0525284	0	0.0355015	-0.144375	-0.11915	0.292973	0.0615005	0	0.182814	0.00351334	-0.029974	0.163157	0.152588	0	-0.436171	-0.765059	-0.433125	-0.162037	-0.228666	0	0.00539017	-0.366236	-0.315521	-0.0623646	-0.0526619	0	0.229897	-0.19824	-0.204945	0.382713	0.404692	0	0.25285	-0.480309	-0.539829	0.173655
P02655	APOC2	Apolipoprotein C-II	0	-0.228514	-0.538765	-1.17294	-0.813921	-0.298035	0	-0.124912	-0.106031	-0.315042	-0.451988	0.119978	0	0.096611	-0.0832844	-0.0992947	0.0453415	0.0583916	0	0.264475	0.1632	-0.0548477	-0.193914	-0.0524292	0	-0.983805	-0.979477	-0.983541	-0.666718	-0.532841	0	-0.224056	-0.154724	-0.328541	-0.384691	-0.27767	0	-0.280125	-0.329531	-0.504581	-0.390257	-0.296961	0	0.465254	0.477709	0.171591	0.305927
P02656	APOC3	Apolipoprotein C-III	0	-0.276114	-0.488981	-0.818001	-0.286663	0.013504	0	0.0454502	0.0398159	-0.119852	-0.137112	0.099123	0	0.489119	0.366722	0.434879	0.498512	0.42382	0	0.335871	0.456938	0.423464	0.290375	0.092104	0	-0.313448	-0.123753	-0.0796356	0.137367	-0.218037	0	-0.175688	0.0155144	-0.110203	-0.0544949	-0.129953	0	-0.329039	-0.0483265	-0.28536	-0.181742	-0.259933	0	0.594864	0.576921	0.255934	0.573914
P02671	FGA	Fibrinogen alpha chain	0	0.308466	-0.291821	-0.00496864	-0.0819759	-0.0373325	0	0.00604057	-0.110188	0.148491	-0.18918	-0.0626392	0	0.147337	0.755592	-0.230227	-0.125463	0.506868	0	-1.15297	-1.1645	-1.40173	-1.27097	-1.23645	0	-0.00485039	1.13782	0.573757	0.189308	0.646751	0	0.0163269	-0.0364609	-0.0798969	0.1227	0.265469	0	0.138195	-0.326935	-0.119759	-0.111818	-0.0147133	0	-0.839222	-1.00317	-0.853302	-0.993553
P02675	FGB	Fibrinogen beta chain	0	0.325846	-0.109669	0.123173	0.0469913	0.169086	0	-0.0373898	-0.0397053	0.0717869	-0.15892	-0.0317211	0	0.126913	0.605101	-0.0914803	0.022831	0.476654	0	-0.962542	-0.886517	-1.11698	-0.980623	-0.949459	0	-0.0386276	0.898941	0.472479	0.11659	0.431477	0	0.0201454	-0.00611496	-0.0873489	0.052784	0.188305	0	0.128296	-0.195612	-0.145315	-0.0957584	0.0664101	0	-0.710258	-0.818003	-0.698099	-0.811989
P02679	FGG	Fibrinogen gamma chain	0	0.329376	-0.0997925	0.178486	0.129456	0.1838	0	-0.0183773	-0.0433025	0.125885	-0.250977	-0.0570183	0	0.206223	0.745321	-0.125292	-0.0569248	0.518446	0	-1.08273	-1.03535	-1.29433	-1.14365	-1.11215	0	0.0128803	1.06573	0.568947	0.182484	0.565456	0	0.0134583	-0.0106716	-0.0770416	0.0726681	0.184452	0	0.0714722	-0.214241	-0.12846	-0.115055	-0.0230675	0	-0.749279	-0.841679	-0.714338	-0.894896
P02743	APCS	Serum amyloid P-component	0	-0.105131	-0.281067	-0.508648	-0.757544	-0.542597	0	-0.25144	-0.241121	-0.312601	-0.37096	-0.347084	0	-0.218414	-0.202532	-0.67762	-0.595943	-0.490767	0	-0.350889	-0.393259	-0.592129	-0.489988	-0.566071	0	0.0260372	-0.181915	-0.615137	-0.320509	-0.272461	0	-0.0847301	-0.00138855	-0.116673	0.134895	-0.0572243	0	0.143421	-0.928034	-0.554569	-0.342077	-0.465086	0	-0.067379	-0.312944	-0.220541	-0.0985699
P02745	C1QA	Complement C1q subcomponent subunit A	0	0.0725803	0.152708	-0.0333786	0.0465031	0.0037384	0	-0.051815	0.0355701	-0.0474453	-0.177937	-0.0678368	0	0.0734367	0.252672	0.100554	-0.0224419	0.209885	0	-0.333408	-0.447399	-0.497375	-0.391899	-0.321224	0	-0.241413	0.301487	-0.0605812	-0.0883007	0.12904	0	0.0877037	-0.0290451	0.0646343	0.067091	0.0536003	0	0.327209	0.264965	0.199581	0.204048	0.125246	0	-0.248514	-0.269739	-0.193277	-0.221725
P02746	C1QB	Complement C1q subcomponent subunit B	0	0.0807533	-0.0598927	-0.104439	-0.109997	-0.126717	0	-0.0876427	-0.317932	-0.070797	-0.0476856	-0.132465	0	-0.0179329	0.106321	-0.332537	-0.140793	-0.0616493	0	-0.416916	-0.400074	-0.471626	-0.397331	-0.426815	0	-0.129667	0.348457	-0.141506	-0.0716248	0.175394	0	0.124647	-0.0818253	-0.0556774	0.0897255	0.0268822	0	0.264835	-0.0969505	0.059227	-0.0121708	0.0231609	0	-0.295002	-0.502001	-0.457035	-0.305418
P02747	C1QC	Complement C1q subcomponent subunit C	0	0.154608	0.034277	-0.133116	0.172813	-0.0617046	0	0.0766563	0.027998	0.0539837	-0.0546169	-0.00917435	0	0.0377827	0.193264	-0.217535	-0.0201912	0.188633	0	-0.405993	-0.402359	-0.435953	-0.424509	-0.431364	0	0.123053	0.345722	-0.0848751	-0.13266	0.379278	0	-0.0482292	-0.079958	-0.142393	-0.00811958	-0.0889645	0	0.151308	0.0657806	0.0881519	0.118387	0.0553513	0	-0.326469	-0.359467	-0.561268	-0.370213
P02748	C9	Complement component C9	0	-0.0249577	0.011982	0.0386219	0.0518589	0.182358	0	-0.191204	-0.285202	-0.240601	-0.182102	-0.0685043	0	-0.500004	-0.512548	-0.440426	-0.436304	-0.381527	0	0.0686302	0.0528145	0.0203495	0.0573921	0.0748978	0	-0.11911	-0.217281	-0.095026	-0.0613708	-0.0190811	0	-0.0533504	-0.136528	-0.17182	-0.0866699	-0.027359	0	-0.150812	-0.0617409	-0.0343857	-0.054945	0.219618	0	-0.104185	-0.0299129	-0.0230923	-0.0393982
P02749	APOH	Beta-2-glycoprotein 1	0	-0.0463448	0.0480289	0.123199	0.0393829	0.256275	0	0.122198	-0.014246	0.0057354	-0.0248241	0.0890675	0	-0.00215149	-0.0284519	0.141651	0.213131	0.258717	0	0.223183	0.249146	0.178175	0.234358	0.248623	0	-0.02314	-0.048645	0.0309505	0.102158	0.0919571	0	-0.0386963	-0.0122871	-0.191683	-0.0802364	-0.0318451	0	-0.0139561	0.254827	0.171745	0.0752354	0.0877857	0	0.148668	0.231403	0.161158	0.151957
P02750	LRG1	Leucine-rich alpha-2-glycoprotein	0	0.0831566	0.136093	0.120819	0.0162506	0.37878	0	0.0547276	0.055397	0.036274	-0.00756836	0.344383	0	-0.374878	-0.472347	-0.375156	-0.310167	-0.279161	0	0.0175781	0.0148754	-0.0558624	-0.0517349	-0.0864735	0	0.0272598	0.0334625	0.0291271	0.0403519	0.198267	0	-0.274315	-0.179546	-0.153717	-0.208672	-0.390303	0	-0.257051	-0.162663	-0.0748444	-0.0893993	0.226894	0	-0.252974	-0.0744171	-0.0682964	-0.0241432
P02751	FN1	Fibronectin	0	1.30525	-0.924179	0.473867	0.113968	0.0191402	0	0.338602	0.585728	1.13585	-0.762197	-0.896322	0	1.35267	1.81723	-0.0704269	-0.132454	1.78653	0	-2.31597	-1.84209	-3.65967	-2.44266	-2.75455	0	0.319876	2.14659	1.94794	0.824858	0.745739	0	-0.0624771	0.34129	0.483213	0.813375	1.29833	0	-0.108248	-1.46344	-1.06427	-0.801832	-0.650042	0	-1.37692	-1.64994	-0.841913	-1.96718
P02753	RBP4	Retinol-binding protein 4	0	-0.362898	-0.191563	-0.226397	-0.240318	-0.00435638	0	0.122944	-0.0238018	0.0409088	-0.0385818	0.0201378	0	0.0245609	-0.115734	-0.00570869	-0.054985	-0.0607471	0	0.14036	0.102442	0.117708	0.0856304	0.123339	0	-0.151896	-0.0652676	-0.0175152	-0.0429192	-0.00514793	0	0.0605145	-0.0322208	-0.0512638	-0.0281239	-0.0493164	0	-0.297832	-0.0660934	-0.206089	-0.289759	-0.191055	0	0.00130081	0.124311	0.089407	0.00255012
P02760	AMBP	Protein AMBP	0	-0.18083	-0.0776024	-0.0436821	0.0545254	0.149347	0	0.0113277	0.0408649	-0.0336094	-0.0573101	0.0632038	0	0.236895	0.0227871	0.311497	0.281025	0.243019	0	0.234152	0.209045	0.287291	0.239504	0.303699	0	-0.176996	-0.0655251	-0.034832	0.0149231	0.055294	0	0.138317	-0.0473843	-0.0145397	-0.0378132	-0.00636101	0	0.0031395	0.258478	0.206249	0.148689	0.242964	0	0.120237	0.0432243	0.0248051	0.121233
P02763	ORM1	Alpha-1-acid glycoprotein 1	0	-0.0218067	0.0878601	0.125544	0.0642624	0.167982	0	-0.16881	-0.155956	-0.149845	-0.10178	-0.0417824	0	-0.296644	-0.372959	-0.13102	-0.186386	-0.303591	0	-0.0481739	0.086565	0.0161743	0.02034	-0.0142288	0	0.167896	0.172405	0.155628	0.2087	0.00167656	0	-0.155437	-0.0672321	-0.133814	-0.158289	-0.102154	0	0.283249	0.555761	0.547953	0.37674	0.652445	0	-0.243328	-0.129467	-0.0846558	-0.135302
P02765	AHSG	Alpha-2-HS-glycoprotein	0	-0.0858135	-0.0170002	0.0294113	-0.017643	-0.00616837	0	-0.0726719	-0.0560856	-0.0635834	-0.066946	-0.0718212	0	-0.0252552	-0.171173	-0.000358582	0.000988007	-0.0859375	0	0.192732	0.197367	0.224905	0.231924	0.190628	0	-0.102858	-0.0296535	0.00421524	0.0555649	-0.123537	0	-0.0348377	-0.0128384	0.0155945	0.0238342	0.0316296	0	-0.108749	0.00662613	-0.00645638	-0.0804176	-0.0501213	0	0.120358	0.185238	0.205017	0.158802
P02766	TTR	Transthyretin	0	0.647516	-0.453705	-0.817495	0.190845	0.505896	0	-0.238756	-1.4588	-0.668016	0.53866	-0.265953	0	0.267559	0.241398	-0.294287	0.507793	0.94161	0	-0.522329	-1.45548	-1.41849	-0.653463	-0.566051	0	-0.0233803	0.452019	-0.433796	0.368122	0.926107	0	0.04599	-0.830357	-0.539085	0.220657	0.142761	0	0.276793	-0.657	-0.50185	0.482609	-0.100492	0	-0.403046	-1.71233	-1.77575	-0.370962
P02768	ALB	Albumin	0	-0.0668221	0.0229797	0.0322914	-0.0213699	0.0215416	0	0.0519981	0.0609398	0.0478058	0.0519867	0.0627899	0	0.0952568	0.0694275	0.132557	0.169582	0.0881805	0	0.0446129	0.129887	0.114906	0.0910034	0.0460434	0	-0.0154648	0.0241966	0.0449181	0.0754929	-0.0178757	0	0.0111542	-0.000759125	-0.0813522	-0.0649376	-0.0541611	0	0.0669441	0.42989	0.375664	0.301279	0.262972	0	0.0585613	0.150019	0.129654	0.103689
P02774	GC	Vitamin D-binding protein	0	-0.0915012	-0.0218735	-0.00739479	-0.0296173	0.0528946	0	0.0732689	0.0417919	0.0553703	0.022768	0.0562	0	-0.0774784	-0.175226	-0.0908585	-0.123341	-0.0949192	0	0.0386333	0.0253716	0.0492954	0.0526791	0.0298347	0	-0.0835972	-0.134771	-0.0341625	0.052042	-0.103287	0	0.036993	0.0232067	0.0540867	0.0329037	-0.000471115	0	-0.0387344	0.106705	0.042141	-0.0180855	0.0748672	0	0.00546646	0.0730934	0.102812	0.0154228
P02786	TFRC	Transferrin receptor protein 1	0	0.121264	0.17798	0.0867119	-0.0513763	0.203041	0	-0.124949	-0.22941	-0.211174	-0.24478	-0.264301	0	0.128754	0.0157509	-0.0849247	-0.207487	-0.175589	0	-0.225039	-0.415514	-0.112247	-0.561672	-0.137764	0	-0.0466728	0.429024	0.30061	0.264603	0.159567	0	-0.314299	-0.0715866	0.0648384	-0.0682049	0.0662422	0	-0.23209	-0.171761	-0.106079	-0.00118828	-0.0815754	0	0.00181389	-0.195807	-0.0820217	-0.0298347
P02787	TF	Serotransferrin	0	-0.0911465	0.024477	-0.00283813	0.0487404	0.0495625	0	0.0384808	0.0376549	0.0157719	0.0279999	0.029295	0	0.0525494	-0.0125122	0.160328	0.140184	0.0565243	0	0.169983	0.178093	0.210991	0.195303	0.181183	0	-0.0465508	-0.0400887	0.0766144	0.129946	-0.0665989	0	0.0066452	-0.000244141	-0.0310478	-0.0190582	-0.0480537	0	-0.0901699	0.158182	0.0850525	0.0100765	0.0357685	0	0.130939	0.240086	0.260792	0.195984
P02788	LTF	Lactotransferrin	0	0.0960903	-0.0510311	0.00785065	-0.14237	0.0273151	0	0.0733624	0.0674171	0.0421257	-0.019907	0.0526867	0	0.442595	0.454636	0.311289	0.451508	0.436453	0	-0.276041	-0.156067	-0.134542	-0.650496	-0.126633	0	0.036396	0.0549335	-0.128029	0.214725	0.2208	0	0.452095	0.212034	0.20439	0.395926	0.502842	0	-0.152096	0.349476	0.301222	0.233017	0.201666	0	-0.0935173	0.100782	-0.110271	-0.180006
P02790	HPX	Hemopexin	0	-0.0745697	0.0136108	-0.00263405	-0.0195923	-0.0128403	0	0.0217419	-0.00496292	0.0557213	0.0286579	-0.00477219	0	0.0266304	-0.0156174	0.0421143	0.0691795	-0.00803185	0	0.09268	0.121777	0.112049	0.0697651	0.0351238	0	-0.077631	0.0154724	-0.0120087	0.0310078	-0.00945854	0	-0.0318241	-0.0259209	-0.0994053	-0.00569916	-0.00808907	0	0.0220776	0.264599	0.20812	0.0970173	0.0927925	0	0.18576	0.266727	0.304552	0.204988
P03950	ANG	Angiogenin	0	-0.0634632	-0.293119	-0.124134	-0.117599	-0.175619	0	-0.134398	-0.250835	-0.215046	-0.1991	-0.104715	0	0.50153	0.256153	0.14053	0.495499	0.387344	0	-0.17016	-0.0222683	0.402899	0.153797	0.1042	0	0.248539	0.223885	0.0252171	0.0233154	0.134953	0	-0.213322	-0.0716705	-0.0601864	0.0298977	-0.0483742	0	0.270397	0.124485	0.0931644	-0.237476	-0.198946	0	-0.0711517	-0.010931	-0.0365677	0.00712776
P03951	F11	Coagulation factor XI	0	0.065033	0.229366	-0.0391464	0.0902004	0.315159	0	0.0348835	-0.10919	-0.0921669	-0.186769	-0.0352001	0	-0.0280437	-0.0975437	-0.156277	-0.144743	-0.106384	0	0.319208	0.228882	0.119627	0.199898	0.227556	0	-0.230501	-0.358419	-0.298492	-0.143763	-0.205929	0	-0.16634	-0.201084	-0.166737	-0.0284786	-0.163065	0	-0.183525	-0.163664	-0.0967731	-0.141422	-0.0651188	0	0.0736599	-0.0869236	0.146481	0.0931625
P03952	KLKB1	Plasma kallikrein	0	0.0246754	0.103901	0.0168247	0.00333023	0.0401573	0	-0.0301723	-0.0342617	-0.014185	-0.0563335	-0.046114	0	-0.0336895	-0.111258	0.00382805	-0.0328331	-0.0718575	0	0.0114536	0.019289	0.0230598	0.0639114	0.0514908	0	-0.130745	-0.161842	-0.131565	-0.0512981	-0.177618	0	-0.0231876	-0.0148659	-0.0494366	-0.059845	-0.0507584	0	-0.0655804	-0.0560627	0.0267162	-0.0603886	0.00561714	0	0.130011	0.213514	0.157635	0.0788517
P04003	C4BPA	C4b-binding protein alpha chain	0	-0.0733395	-0.0480289	-0.0553131	-0.0484505	-0.0114574	0	-0.102734	-0.158892	-0.0813866	-0.119617	-0.0490017	0	-0.0784111	0.873941	-0.153214	-0.192606	0.544579	0	-1.09924	-1.09893	-1.0962	-1.11638	-1.09872	0	-0.27128	0.910694	-0.205473	-0.154097	0.796637	0	-0.040369	-0.0815716	-0.0953503	-0.0317039	-0.053196	0	0.327101	0.0699539	0.0780582	-0.0205956	0.112299	0	-1.03288	-1.05462	-1.02492	-1.11563
P04004	VTN	Vitronectin	0	0.0500774	0.0217476	-0.0110798	0.0213146	0.0311794	0	0.0559025	-0.00696373	0.00203323	-0.0292892	0.0912552	0	-0.0177441	-0.144024	-0.171886	-0.0870209	-0.0134354	0	-0.039814	-0.075964	-0.116732	-0.096981	-0.0247784	0	0.0694752	0.131212	0.0199032	0.0631809	0.198492	0	0.100153	0.105207	0.0537453	0.103165	0.177546	0	-0.0916767	-0.0154629	0.0960941	0.109501	0.0540504	0	0.110527	0.0355549	0.0348854	0.0878716
P04040	CAT	Catalase	0	-1.20949	-0.219324	-0.357174	0.114046	-0.225523	0	0.494411	-1.09098	0.540991	0.153812	-0.692631	0	-0.805182	-0.0988636	-0.716579	-0.752443	0.354147	0	1.54249	1.96705	-0.481222	-0.0639496	1.19031	0	-0.0999966	-1.24747	1.14056	0.0656796	-0.14086	0	0.455128	0.0907898	-0.398819	0.124783	-0.440908	0	0.54752	0.705679	0.0722542	0.608448	0.701668	0	-0.0960293	0.261168	0.297922	0.258842
P04066	FUCA1	Tissue alpha-L-fucosidase	0	-0.116913	-0.104296	0.0995064	0.037405	-0.00627899	0	-0.0439014	-0.362185	-0.161144	-0.181627	-0.214762	0	0.027256	0.220053	0.118505	0.203463	0.198524	0	0.0901279	-0.0475903	0.00762367	0.114107	0.0341549	0	-0.215773	-0.0953922	0.0107231	0.0411911	-0.0422249	0	0.246592	0.232502	0.201824	0.278765	0.0272884	0	0.0454903	0.0680962	0.196945	0.149349	0.278847	0	-0.439039	0.0348721	-0.357992	-0.245865
P04070	PROC	Vitamin K-dependent protein C	0	0.054594	-0.168211	-0.0511494	-0.0898895	-0.0927467	0	-0.12846	-0.461735	-0.13188	-0.433426	-0.0735302	0	0.134619	-0.041151	0.0159321	0.0950012	0.0358391	0	0.188694	0.0265026	0.0353584	0.0629082	0.0883656	0	0.0523376	0.066864	0.0681057	0.0893841	0.0215759	0	-0.0164032	-0.019413	-0.163988	-0.13125	-0.183022	0	0.000429153	-0.0389633	0.0475388	-0.0293884	-0.00971222	0	0.186504	0.293982	0.348646	0.292393
P04075	ALDOA	Fructose-bisphosphate aldolase A	0	0.104849	0.172314	-0.015398	-0.171673	0.26182	0	-0.0840549	-0.347181	-0.228661	-0.281868	-0.232786	0	-0.340782	-0.303196	-0.428308	-0.167631	-0.0161076	0	0.160263	-0.141436	0.266537	0.273108	0.0240116	0	0.139746	-0.00676727	-0.0748558	0.0519123	0.116753	0	0.454672	0.171032	-0.118193	0.0856514	0.144661	0	0.150173	0.26874	-0.0305099	0.0193768	0.213438	0	-0.0276852	-0.853975	-0.101038	-0.0411396
P04114	APOB	Apolipoprotein B-100	0	-0.289459	-0.285889	-0.297766	-0.365004	-0.336197	0	-0.149786	-0.178652	-0.162542	-0.208105	-0.199244	0	-0.0872135	-0.13768	-0.143169	-0.117201	-0.12071	0	-0.140297	-0.104448	-0.158005	-0.191818	-0.137472	0	-0.461088	-0.485832	-0.512503	-0.414682	-0.366081	0	0.112997	0.0896893	0.0627594	0.164246	0.0755787	0	-0.148235	-0.150558	-0.0941811	-0.11183	-0.149313	0	0.15498	0.0673981	0.0662231	0.0468597
P04180	LCAT	Phosphatidylcholine-sterol acyltransferase	0	0.152895	-0.173662	-0.139931	-0.285347	-0.240505	0	-0.139288	-0.15324	0.0738983	-0.0381489	-0.231367	0	0.118011	0.0769672	-0.0299339	0.0109997	0.167566	0	-0.0378246	0.152725	0.117655	-0.0469723	0.0712948	0	-0.0828037	-0.219194	-0.500731	-0.325048	-0.11064	0	0.0976276	0.0606422	0.0954113	0.126225	0.204353	0	-0.189041	-0.379379	-0.28441	-0.399357	-0.259663	0	0.0756931	0.0682659	0.141363	0.0325489
P04196	HRG	Histidine-rich glycoprotein	0	-0.0125866	0.0355949	0.0932064	0.0298138	-0.0144215	0	-0.05443	-0.055563	0.0032196	-0.0520382	-0.0403805	0	0.128162	0.0775394	-0.047821	0.0898361	0.0754986	0	-0.0250893	-0.0590973	-0.0288353	-0.0496197	-0.0379238	0	-0.0482788	0.117247	-0.0644855	0.0368996	0.102312	0	-0.0775051	-0.107424	-0.0636578	0.0169621	-0.015274	0	-0.17312	-0.134352	-0.133251	-0.212084	-0.214546	0	-0.0674686	0.0580406	0.00231743	-0.0965157
P04211	IGLV7-43	Immunoglobulin lambda variable 7-43	0	0.028677	0.124363	0.12467	0.128122	0.153067	0	0.0244274	0.13414	0.00544357	-0.00277138	0.0208721	0	0.00710869	-0.171213	0.0634632	-0.0379238	-0.294672	0	-0.220861	-1.00773	-0.2299	-0.252363	-0.376083	0	-0.637363	-0.135126	-0.0553532	0.0857849	-0.0324306	0	0.0514755	-0.0525093	0.00922585	0.0443459	-0.0765667	0	0.291759	0.155092	0.403738	0.436478	0.551525	0	0.325571	0.287069	0.404791	0.165274
P04217	A1BG	Alpha-1B-glycoprotein	0	-0.101162	-0.0786667	-0.0251331	0.0604553	0.101736	0	0.0436077	0.0954437	0.0260983	0.0246258	0.0125847	0	-0.00738907	-0.104551	0.0250797	-0.0518169	-0.0207558	0	0.208994	0.161896	0.140011	0.250481	0.137579	0	-0.00366783	-0.0562897	0.109615	0.162773	0.0143242	0	-0.0151253	-0.00831985	0.0457115	0.0227203	-0.00304794	0	-0.172001	-0.00566482	-0.12344	-0.113729	-0.125505	0	0.0148087	0.0300236	0.117725	0.0761414
P04264	KRT1	Keratin, type II cytoskeletal 1	0	-0.164267	-0.0500965	0.0138016	0.112015	0.0511227	0	0.0211163	0.0725594	0.0337067	0.0318413	0.00889587	0	-0.0832005	-0.159218	-0.140657	-0.0420895	-0.0406723	0	-0.130323	0.0915737	0.191204	0.124525	0.0836449	0	-0.386541	-0.0011673	0.0023098	-0.00255585	-0.087944	0	0.0944672	0.00556374	-0.0119877	-0.0820961	-0.0538826	0	-0.0653286	0.314457	0.0771561	0.113735	0.0681419	0	-0.0650425	0.0236969	-0.173269	0.249361
P04275	VWF	von Willebrand factor	0	-0.0183334	-0.079195	-0.0181522	-0.157999	-0.0986996	0	-0.211632	-0.176014	-0.160107	-0.198103	-0.0936394	0	-0.188856	-0.0842381	-0.222128	-0.0455284	-0.10973	0	-0.174986	-0.0691338	-0.0635052	-0.0938244	-0.0881252	0	0.00256157	0.0179996	0.0463696	0.113968	-0.00955772	0	0.028635	0.0214596	-0.0351982	0.00148201	-0.0679665	0	0.00494957	0.198895	0.125782	0.103985	0.108675	0	0.029789	-0.109636	0.01544	0.00742722
P04278	SHBG	Sex hormone-binding globulin	0	-0.098196	0.0869331	0.394829	-0.0752525	0.050024	0	0.394665	0.270475	0.0540123	0.289469	0.485477	0	0.115086	-0.184397	-0.587414	0.528296	0.0507469	0	0.225271	-0.113482	-0.939621	-0.662073	0.245165	0	-0.120602	0.0383091	0.590473	0.465452	0.792278	0	0.127232	0.0110168	0.193382	-0.708956	-0.719364	0	-0.31039	-0.124313	-0.251925	-0.0981674	-0.344622	0	-0.0797596	0.0871201	0.193703	0.245531
P04406	GAPDH	Glyceraldehyde-3-phosphate dehydrogenase	0	-0.0159874	-0.259792	0.204281	-1.22961	-1.02876	0	0.404184	-0.178482	0.0664577	0.413425	-0.15274	0	0.219507	-2.08919	0.221191	-0.0458679	0.828676	0	-0.566952	-0.266596	-1.41268	-0.588144	-0.494484	0	0.384052	0.480589	0.470848	0.591908	-0.0600491	0	0.16539	0.523796	0.453152	0.105059	0.0592651	0	0.12171	-0.0051918	-0.114838	-0.138529	0.0570316	0	0.00491142	0.230675	0.290009	0.290091
P04430	IGKV1-16	Immunoglobulin kappa variable 1-16	0	0.208475	0.339201	0.109598	0.0409451	0.125	0	0.263561	0.188221	0.225044	0.214439	0.133717	0	0.126638	-0.231951	0.0022316	0.144054	-0.0169945	0	0.314592	0.23612	-0.497959	0.366774	0.404924	0	0.419062	-0.702898	-0.14271	0.227175	0.340912	0	-0.173035	0.0168705	0.00676346	0.27384	-0.529762	0	0.432478	0.525894	0.240042	0.356497	0.465986	0	0.360023	0.366066	0.657425	0.183029
P04433	IGKV3-11	Immunoglobulin kappa variable 3-11	0	0.0387115	0.0658627	-0.00923347	0.00293922	-0.110556	0	-0.0781612	-0.182949	-0.140738	-0.0841885	-0.186226	0	0.239185	0.137571	0.0922546	0.21096	0.156885	0	-0.106926	-0.122149	-0.216599	-0.114073	-0.0980148	0	-0.0698547	-0.171103	-0.166124	-0.0615578	-0.0826912	0	-0.171801	-0.0169163	-0.00655174	0.0747375	-0.0616322	0	0.36894	0.427797	0.310505	0.4956	0.302191	0	-0.0668163	0.230745	0.233084	0.225117
P05062	ALDOB	Fructose-bisphosphate aldolase B	0	0.419359	0.328636	1.08337	-0.506279	-0.103401	0	0.997711	0.709251	0.842182	0.450468	0.636774	0	-0.443756	-0.875025	-0.652798	-0.595852	0.953838	0	-0.344746	0.123652	2.13007	-0.712423	1.65368	0	-0.79138	-2.3307	-1.89011	-0.891703	-0.439735	0	-0.360245	-0.649004	-0.0455608	-0.314953	0.272745	0	0.305984	-1.30716	-0.509312	0.549234	-0.61768	0	0.242138	-0.446764	-0.539406	0.199564
P05067	APP	Amyloid-beta precursor protein	0	0.491825	0.541019	0.22172	0.140524	0.160568	0	-0.285461	-0.131756	0.08922	0.0845032	0.0797539	0	0.472801	0.294849	0.267904	0.259668	-0.306862	0	0.180471	0.0853901	-0.27038	0.132221	-0.279228	0	-0.0978603	0.151505	0.0722408	-0.151007	-0.217278	0	-0.124468	-0.54883	-0.541203	-0.085598	-0.349537	0	-0.111279	-0.788939	-0.207935	-0.581181	-0.900749	0	-0.508896	0.0421486	0.0561504	-0.0513611
P05089	ARG1	Arginase-1	0	0.48225	0.235744	0.240366	0.25703	0.0253696	0	0.865265	0.762167	0.804482	0.760715	0.859871	0	0.0383568	0.0353088	-0.148169	-0.0517807	-0.0195656	0	0.0289497	-0.215353	-0.251272	-0.110146	-0.142517	0	-0.0141067	0.00480461	-0.103298	-0.00212669	0.0149899	0	-0.102568	-0.0176601	0.0293388	0.0790195	-0.0707436	0	-0.00334168	-0.111773	0.00865746	-0.0602207	0.0325565	0	-0.0360241	-0.388933	-0.323959	-0.0809841
P05090	APOD	Apolipoprotein D	0	-0.214663	0.0161667	-0.0330276	0.00504112	0.0131569	0	0.224182	0.180607	0.2281	0.0565891	0.13582	0	-0.0292702	-0.1373	0.148773	0.0779552	-0.0329208	0	0.371262	0.238426	0.310982	0.401766	0.283934	0	-0.343334	-0.229843	0.0367546	0.00271225	-0.239782	0	0.0084095	0.000282288	0.0999928	0.049551	0.0445747	0	-0.112114	0.180559	0.1129	0.0130062	0.0585155	0	0.281727	0.388372	0.377714	0.365171
P05109	S100A8	Protein S100-A8	0	-0.105471	-0.0508614	-0.258286	-0.207891	-0.305765	0	0.235489	0.141521	0.188723	0.0376663	0.289972	0	-0.0609226	0.04813	0.0550518	0.102846	0.0244942	0	0.0287647	0.127146	0.275431	0.186298	-0.0504227	0	-0.106861	-0.0095787	0.114618	0.214939	0.0719852	0	0.0393276	0.218409	0.0395374	0.0946789	0.188007	0	-0.119446	0.464823	0.410519	0.261295	-0.0275173	0	0.209312	0.465912	0.454018	0.2376
P05154	SERPINA5	Plasma serine protease inhibitor	0	0.0298843	0.0916119	0.0457439	0.0941219	0.200039	0	0.0150452	-0.0682068	-0.0729542	-0.0272121	-0.107862	0	0.0545692	-0.026659	-0.11935	0.0278378	0.0706444	0	-0.0353489	0.057148	0.0758419	-0.0674801	0.0741997	0	0.130396	-0.123272	-0.0382996	-0.0629501	-0.0878162	0	-0.496782	0.0685387	0.0586891	-0.302412	-0.270027	0	-0.143871	-0.418957	-0.342808	-0.395035	-0.564144	0	0.246954	0.0320911	0.0663242	0.160776
P05155	SERPING1	Plasma protease C1 inhibitor	0	-0.0131931	0.0399189	-0.00341034	0.00336266	0.017662	0	0.0605698	-0.0892181	-0.0321045	0.0247822	-0.00772095	0	-0.0223045	-0.132383	-0.17639	-0.0912037	-0.182779	0	0.104792	0.151588	0.114044	0.0863552	0.0327168	0	-0.156551	-0.838598	-0.0985966	-0.0605946	-0.650362	0	-0.251141	-0.120136	-0.213919	-0.115133	-0.759199	0	-0.133286	-0.140551	-0.0263996	-0.0947857	-0.0177479	0	0.0139542	-0.0217094	0.00224495	0.0632648
P05156	CFI	Complement factor I	0	-0.0284443	0.0503712	0.113995	0.103725	0.00670052	0	-0.0254402	-0.0641365	0.028862	-0.144468	-0.110264	0	0.0100079	-0.128605	-0.115732	0.00310135	-0.102591	0	-0.10232	-0.113876	-0.136618	-0.114614	-0.118023	0	-0.0274448	-0.0267925	-0.00543785	0.0413628	-0.0157509	0	0.0327187	0.0404263	0.0909195	0.108364	0.0613403	0	-0.0545845	-0.0433674	-0.0749416	-0.174158	-0.0172424	0	-0.087883	-0.0198326	0.0167465	-0.0731068
P05160	F13B	Coagulation factor XIII B chain	0	-0.0901623	-0.0870152	0.102528	0.00934982	0.0443478	0	0.109451	-0.00151444	0.0661354	-0.122635	-0.00686455	0	0.201912	0.23938	0.231291	0.277624	0.326412	0	0.0714283	-0.00905991	-0.0433254	0.0192566	0.0727615	0	-0.0427074	0.066988	0.128674	0.182417	0.220699	0	-0.0177689	0.0124226	-0.0455761	0.0238247	0.164387	0	-0.0105171	-0.0109692	0.187037	0.0596962	0.0630951	0	0.101324	0.14452	0.187275	0.0423737
P05362	ICAM1	Intercellular adhesion molecule 1	0	-0.0114727	0.0446167	0.0226688	0.111406	-0.142962	0	-0.109613	0.0281754	-0.134838	-0.225531	-0.231796	0	-0.230551	-0.699356	0.0667267	-0.197563	-0.130787	0	-0.508354	0.168413	-0.10858	0.210711	-0.186327	0	0.1868	0.286276	0.339653	-0.0616055	0.0525665	0	0.0933971	0.149702	-0.0486488	0.210844	0.0494537	0	0.321947	1.07602	1.32405	0.961794	1.06416	0	-0.220728	0.373968	0.218769	-0.212988
P05452	CLEC3B	Tetranectin	0	-0.00852776	0.113125	0.231022	0.0778255	0.033205	0	-0.0257015	-0.0565338	-0.05686	0.0140839	-0.195467	0	0.132507	0.115408	0.231655	0.281929	0.187136	0	-0.0795937	-0.10531	0.0210533	0.0358028	-0.192366	0	-0.00935173	0.0348606	0.00227547	0.0361233	-0.0446339	0	-0.097744	-0.140871	-0.132036	-0.126551	-0.114069	0	0.144484	0.33366	0.254572	0.162941	0.0826893	0	-0.0150871	0.0458431	0.142391	0.10088
P05543	SERPINA7	Thyroxine-binding globulin	0	-0.0813923	-0.107487	-0.0468922	-0.0870113	-0.0455456	0	0.013588	-0.169537	0.0185852	-0.0807896	-0.00257111	0	-0.174356	-0.0987873	-0.308975	-0.0359745	-0.162899	0	-0.00956726	-0.0719051	-0.184286	-0.0279751	-0.0447025	0	0.149021	0.0740032	0.0598907	0.147251	0.121943	0	-0.11158	-0.150108	-0.133221	-0.0575371	-0.121313	0	0.0475769	-0.0157471	0.130022	0.118895	0.18539	0	0.129723	0.106812	-0.00354576	0.15332
P05546	SERPIND1	Heparin cofactor 2	0	0.108698	0.135773	0.0520782	0.081934	0.106834	0	-0.0444546	-0.0654316	-0.0796108	-0.184139	-0.116415	0	-0.111105	-0.160189	-0.288773	-0.2026	-0.140894	0	0.0761414	0.0320015	-0.0149155	-0.0134201	0.029768	0	0.141546	-0.0104485	-0.043045	0.0534286	0.0287895	0	0.00268555	-0.021307	-0.00919533	0.12459	0.0821037	0	-0.507921	-0.548512	-0.482037	-0.416372	-0.479925	0	0.197433	0.0837803	0.143379	0.209576
P06276	BCHE	Cholinesterase	0	-0.126753	0.00666809	0.0329018	-0.0315609	0.0179596	0	-0.125961	-0.134392	-0.00325012	-0.153376	-0.153923	0	-0.135035	-0.189816	-0.366156	-0.230196	-0.190956	0	-0.0601425	0.017437	-0.0712776	-0.235777	-0.0665436	0	-0.166147	-0.118084	-0.141798	-0.220707	-0.360605	0	-0.110758	-0.106689	-0.179338	-0.224373	-0.123211	0	0.218954	0.157173	0.21014	0.2391	0.205946	0	0.309429	0.112341	0.239538	0.318285
P06310	IGKV2-30	Immunoglobulin kappa variable 2-30	0	-0.0124092	0.295233	0.342541	0.344852	0.391132	0	0.112505	-0.0827923	-0.00349808	0.00531006	-0.0244751	0	-0.112303	0.145588	0.0120487	0.118536	-0.156439	0	0.187607	0.15848	0.119522	-0.122961	0.316481	0	0.0209656	0.754971	0.685926	0.674	0.560307	0	-0.100973	-0.0741882	-0.111279	-0.120125	-0.0265141	0	0.971308	1.50139	1.23423	0.652367	0.866791	0	0.331209	1.5048	1.22451	0.555553
P06312	IGKV4-1	Immunoglobulin kappa variable 4-1	0	0.0105038	-0.0671997	-0.107285	-0.0999126	-0.127535	0	-0.00446701	-0.1451	-0.143641	-0.0238914	-0.123592	0	0.362589	0.438431	0.237581	0.341145	0.361507	0	-0.0825615	-0.150099	-0.192358	-0.164951	-0.19495	0	-0.0212002	-0.0916958	-0.248516	0.00322151	0.0802326	0	-0.104439	-0.192099	-0.194788	0.013134	-0.0911846	0	0.269951	0.168056	0.274496	0.276388	0.29067	0	0.19054	0.127129	0.12632	0.0936108
P06331	IGHV4-34	Immunoglobulin heavy variable 4-34	0	0.0145226	0.0454254	-0.00912857	-0.0945492	-0.180729	0	0.0658932	-0.14888	-0.0159702	0.0585213	-0.114046	0	0.174456	0.0912304	-0.188993	0.0391254	-0.0452576	0	-0.0229034	-0.0057621	-0.233086	-0.0930843	-0.0571365	0	0.131205	0.169048	-0.0974731	0.0101986	0.0226593	0	-0.403717	-0.132603	-0.113274	0.145321	0.174398	0	0.191833	-0.0081501	0.0672474	0.0666695	0.229946	0	0.438988	0.161354	0.24906	0.480654
P06396	GSN	Gelsolin	0	-0.169117	-0.0674324	-0.0996609	-0.107019	-0.13327	0	0.19249	0.218264	0.192198	0.176268	0.0694294	0	0.210423	0.12772	0.26618	0.184059	0.0908127	0	0.170921	0.184502	0.196222	0.1807	0.0606575	0	0.0169239	0.0907326	0.131397	0.218904	-0.0999088	0	-0.0493679	0.0447445	0.0468903	0.00028038	-0.0699596	0	0.146507	0.393068	0.390196	0.297903	0.243444	0	0.168844	0.243708	0.201946	0.183445
P06681	C2	Complement C2	0	-0.0408077	-0.116566	-0.0214005	-0.100609	-0.061161	0	0.00881195	-0.0343113	-0.00509453	0.00482178	0.017374	0	-0.154488	-0.267632	-0.279091	-0.275322	-0.287926	0	-0.0292645	-0.0246067	-0.105766	-0.0490704	-0.0111084	0	-0.162783	-0.133793	0.0212784	-0.0956726	-0.133398	0	-0.243557	-0.00725365	-0.120958	-0.0918388	-0.120981	0	-0.0508785	0.0537243	-0.039547	-0.0648556	-0.0534477	0	-0.102459	-0.0674553	-0.106394	0.00639534
P06702	S100A9	Protein S100-A9	0	-0.201035	-0.103512	-0.0253696	-0.240757	-0.353886	0	-0.150726	-0.303671	0.108887	-0.127134	0.021965	0	0.0348682	-0.0431633	0.0636215	0.218214	0.182995	0	0.14119	-0.430777	-0.285906	-0.129042	0.054657	0	-0.203152	0.0978851	0.22401	-0.0601883	0.118906	0	0.0426941	0.00352097	0.106256	0.193018	0.287848	0	0.192451	0.757627	0.629862	0.612782	0.0910358	0	0.0946579	0.642334	0.465576	0.178896
P06727	APOA4	Apolipoprotein A-IV	0	0.0667286	-0.144272	-0.230865	-0.0846214	0.301125	0	-0.116953	-0.411617	-0.461	-0.55106	-0.345901	0	0.521275	0.225798	0.327343	0.305582	0.39571	0	-0.0104542	-0.154776	-0.218584	-0.292191	-0.222988	0	0.271812	-0.011385	-0.0669193	0.0583572	-0.0238724	0	-0.0173798	-0.221951	-0.268616	-0.320175	-0.131393	0	-0.473269	-0.43185	-0.467966	-0.532358	-0.316673	0	-0.032299	-0.122538	-0.139	-0.185665
P06733	ENO1	Alpha-enolase	0	0.268454	-0.140192	0.161301	0.0504723	0.0112381	0	0.051548	0.0335655	0.154234	-0.209593	-0.21789	0	-0.00404739	0.488367	-0.343086	-0.34458	0.229076	0	-0.962374	-0.976437	-1.18078	-1.12426	-1.1576	0	-0.388454	1.13127	0.505455	0.203997	0.516045	0	-0.0149441	-0.0595188	-0.151243	0.0923481	0.177349	0	0.0273552	0.134113	0.329781	0.325336	0.600798	0	-0.716635	-0.806463	-0.615492	-0.8766
P06744	GPI	Glucose-6-phosphate isomerase	0	-0.0805931	0.0808926	0.591867	0.0470619	0.399223	0	-0.488834	-0.175888	-0.251129	0.120991	0.149687	0	0.0990582	-0.0356674	0.107382	0.333036	0.197786	0	-0.0670929	-0.125893	-0.24984	-0.0856476	-0.307076	0	0.350843	-0.00233459	0.146496	0.274551	-0.179369	0	-0.1217	-0.182451	-0.159073	-0.363016	-0.0980816	0	0.53166	0.756062	0.33461	0.335382	0.412632	0	-0.171589	0.0540142	-0.0536957	0.079628
P07148	FABP1	Fatty acid-binding protein, liver	0	0.0511436	0.0169811	-0.189861	0.0445137	-0.0901318	0	-0.038702	-0.144661	0.016407	-0.0385227	0.0565529	0	0.062294	0.121592	-0.0614223	0.0356121	-0.00326347	0	-0.23851	-0.306322	-0.256189	-0.521322	-0.428734	0	0.0179939	0.0446281	-0.0334225	0.0895462	-0.0401211	0	-0.306118	-0.0998573	-0.215921	-0.00629425	-0.14131	0	0.572149	0.39187	0.752584	0.529919	0.54541	0	0.192501	0.121027	-0.0739174	-0.116997
P07195	LDHB	L-lactate dehydrogenase B chain	0	-0.485752	-0.564148	-0.432421	-0.746553	-0.531599	0	0.0447769	-0.207642	-0.174919	-0.0136242	-0.0882092	0	0.275549	0.0100937	-0.291237	0.0563717	-0.0820045	0	-0.377581	-0.328447	-0.503992	-0.732756	-0.269651	0	-0.190474	-0.286739	-0.537983	-0.454853	-0.268631	0	0.3347	0.337843	0.238791	0.213783	-0.0376892	0	0.324667	0.204346	0.306702	0.216875	0.208469	0	-0.093153	-0.00583267	-0.151773	0.123705
P07225	PROS1	Vitamin K-dependent protein S	0	-0.0244961	0.0406227	0.0206699	0.0883904	-0.0340328	0	-0.0169067	-0.0345821	-0.151888	-0.0313339	-0.063385	0	0.0983715	0.563681	-0.0643864	-0.0237808	0.374525	0	-0.673988	-0.590971	-0.664049	-0.6737	-0.653997	0	-0.0601273	0.51507	-0.171032	-0.0539188	0.48797	0	-0.0088253	0.0217972	0.00530434	0.0755806	0.0237751	0	0.173029	0.0890274	0.070488	-0.00929832	-0.000465393	0	-0.708662	-0.689125	-0.66444	-0.805624
P07237	P4HB	Protein disulfide-isomerase	0	-0.0323925	-0.281414	-0.045332	-0.23621	0.0491581	0	0.107172	0.0888596	0.0418015	-0.0823708	0.180096	0	0.160189	0.339436	0.406757	-0.705223	0.391743	0	-0.00901794	-0.0229836	0.0336895	-0.167896	0.017971	0	-0.835838	-0.707863	-0.433357	-0.348511	-0.382355	0	0.240294	0.198713	-0.0440769	0.232241	-0.0708332	0	0.0401878	0.139759	0.0152378	0.0774803	0.11483	0	0.289156	0.455046	0.423946	0.272516
P07307	ASGR2	Asialoglycoprotein receptor 2	0	0.664015	0.806149	1.13456	0.578405	0.688454	0	0.155798	0.195858	0.270386	-0.148918	0.109358	0	-0.0292683	0.208162	-0.2047	-0.165316	-0.0496273	0	-0.744055	-0.655972	-0.883322	-0.769276	-1.24379	0	-1.30687	0.637104	0.187386	-0.581591	0.172174	0	-0.488077	0.0469055	-0.0150661	0.205202	0.2234	0	1.20544	1.21206	1.30086	0.85183	1.15143	0	-2.30947	-0.469223	-0.868704	-1.0649
P07333	CSF1R	Macrophage colony-stimulating factor 1 receptor	0	0.289619	0.264685	0.3738	0.343058	0.565748	0	0.822075	0.0481892	0.154648	0.55842	0.317816	0	0.326767	0.207745	0.28207	0.351131	0.577116	0	-0.1201	-0.191439	-0.151703	-0.218702	-0.256222	0	0.495045	-0.00434494	0.270317	-0.144884	0.603662	0	0.227148	-0.0588341	-0.230295	0.102119	-0.141413	0	0.163383	0.417961	0.462908	0.303513	0.562412	0	0.250416	0.463509	0.47834	0.0609398
P07339	CTSD	Cathepsin D	0	0.25684	0.312349	0.125324	0.219391	0.100845	0	0.191135	0.980707	0.592201	-0.0359592	-0.0306053	0	0.217863	0.0906067	-0.132618	-0.108164	0.0381107	0	0.0453091	0.0342751	0.143158	-0.00147057	0.015276	0	-0.205544	0.192427	0.0438137	-0.020401	-0.0416546	0	-0.23628	0.081831	-0.438288	-0.0870152	-0.159079	0	0.269682	-0.036438	0.0339642	-0.171444	-0.601397	0	-0.39217	0.157717	0.086235	-0.0217552
P07357	C8A	Complement component C8 alpha chain	0	-0.0808067	0.0703278	0.0849152	0.220585	0.227465	0	-0.0348854	0.0287991	-0.0420189	-0.117077	-0.0317211	0	-0.245262	-0.189682	-0.178144	-0.204229	-0.154434	0	-0.0661945	0.00840378	0.0168438	-0.00740814	-0.022234	0	-0.209387	-0.22707	-0.0851498	0.00550652	-0.177834	0	-0.120644	-0.118866	-0.0167885	0.00912285	-0.0127831	0	-0.125467	-0.0590057	-0.118998	-0.115526	-0.0262241	0	-0.117922	-0.00187874	0.0342941	-0.0325031
P07358	C8B	Complement component C8 beta chain	0	-0.0271816	-0.0146236	0.0510025	0.0659161	0.139961	0	-0.0484676	-0.0608082	-0.0291042	-0.0505543	0.0490761	0	-0.00665093	-0.0817814	-0.0143394	-0.0273933	0.00179672	0	-0.0304089	-0.154921	-0.139971	-0.0965405	-0.0657196	0	-0.0997715	-0.0678825	-0.0153828	0.0235844	0.00289345	0	0.026226	-0.0247993	0.0540314	0.0198231	0.0537834	0	-0.167089	-0.10762	-0.0572796	-0.0708771	-0.0269566	0	-0.069313	-0.152435	-0.0870895	-0.0669098
P07360	C8G	Complement component C8 gamma chain	0	-0.121515	-0.0419559	-0.13101	-0.202274	-0.115749	0	0.0208778	-0.0424767	-0.0596771	-0.0618515	0.150318	0	0.0911331	0.0253868	-0.48658	-0.301836	-0.0197449	0	-0.00581932	-0.00856972	-0.358154	0.0532913	0.00542831	0	-0.0318089	-0.0380535	-0.112148	-0.0127945	0.201864	0	-0.161505	-0.0702667	-0.306694	-0.0352783	-0.051897	0	-0.146996	-0.147985	-0.0922756	-0.0345249	0.0865154	0	0.0634232	-0.221977	-0.209955	0.0392151
P07858	CTSB	Cathepsin B	0	-0.117788	-0.360954	0.0143871	-0.290089	-0.500849	0	-0.161783	-0.245735	-0.11447	-0.0541744	-0.153669	0	-0.0307941	0.51516	-0.185341	-0.170195	0.351078	0	-1.11733	-1.1217	-1.01679	-0.937967	-0.857351	0	0.105236	1.02328	0.354931	0.135307	0.839121	0	-0.212561	-0.244097	-0.383339	-0.0523376	0.127449	0	-0.0249805	-1.10033	-0.570921	-0.210173	-0.475491	0	-0.817587	-1.3747	-1.32886	-0.859768
P07900	HSP90AA1	Heat shock protein HSP 90-alpha	0	-0.0805511	-0.208464	-0.19067	-0.31262	-0.527409	0	-0.354908	-1.91967	-1.69253	-0.287884	-0.164503	0	0.0626678	0.332336	-0.211241	-0.536177	-0.136927	0	-0.61548	-0.465183	-0.929955	-0.78566	-0.69973	0	0.17201	0.4629	0.0939159	0.130419	0.275883	0	0.0192337	-0.0565929	0.0923405	0.162603	0.137844	0	-0.0439739	-0.587761	-0.1359	-0.426662	-0.359077	0	-1.10522	-1.30398	-0.537451	-1.23647
P07911	UMOD	Uromodulin	0	-0.206623	-0.730989	-0.344133	-0.634878	-3.35527	0	-0.162025	0.675655	-0.13833	-0.30002	-0.202742	0	0.0328255	0.346369	-0.299978	-0.279987	-0.204473	0	-1.87948	0.236523	0.177565	-0.104252	-0.0221577	0	-1.10112	-0.0714436	-2.31099	-0.181421	0.100315	0	-2.1717	-0.232117	-0.973019	-0.1651	0.164946	0	-1.00107	-0.228636	-0.805883	0.236542	-0.208647	0	-0.37867	0.904408	-0.171978	0.136797
P07942	LAMB1	Laminin subunit beta-1	0	-0.211115	0.0577431	-0.427032	0.231796	0.451757	0	-0.230158	0.00144958	-0.0545769	-0.0897198	0.199574	0	-0.0327263	0.118982	0.0444469	0.0371284	0.366657	0	0.0396118	0.119392	0.155437	0.0682144	-0.330593	0	-0.0778408	-0.444857	0.161436	-0.0415478	-0.071806	0	-0.0440521	0.270987	-0.305912	-0.242081	0.0748062	0	0.193832	0.325542	0.40766	0.441582	0.186674	0	-0.384985	0.0828648	0.0206375	0.0367947
P07996	THBS1	Thrombospondin-1	0	-0.229145	-0.192591	-0.319254	-0.256762	-0.169226	0	0.0878277	-0.0202045	-0.105268	-0.0505505	-0.141867	0	-0.395641	-0.391811	-0.342388	-0.22188	-0.241455	0	-0.0358257	-0.159483	-0.28598	0.0524254	-0.0460396	0	0.188248	0.238867	0.359804	0.345314	0.281818	0	0.19853	0.0726357	0.0252857	-0.00242806	0.166098	0	0.0151157	0.144854	0.0281181	0.0618019	0.314707	0	-0.108196	-0.0271893	0.125544	0.0952816
P07998	RNASE1	Ribonuclease pancreatic	0	-0.0855408	-4.59261	-3.77141	0.208557	-3.78121	0	-4.07864	0.151424	0.118006	0.252071	-3.67404	0	4.02396	-0.793755	4.14767	4.12428	4.10559	0	-4.77792	-5.40285	-0.236582	0.0482254	-4.63975	0	4.23541	4.46049	-0.0742779	3.73626	-0.279507	0	-4.2125	-4.19081	-4.3349	-0.300571	-4.20423	0	-0.671579	-4.13928	0.435001	-0.184177	0.469406	0	0.256287	4.77862	1.72885	1.57867
P08185	SERPINA6	Corticosteroid-binding globulin	0	-0.119291	0.0408916	0.0384693	-0.0589371	-0.030201	0	0.00542259	0.02314	0.0869694	-0.0158119	0.0135727	0	0.0862617	0.0934887	0.197174	0.117529	0.181061	0	-0.0105782	0.142179	0.0869179	0.192495	0.0891151	0	-0.0842896	-0.164209	-0.222019	-0.0614071	-0.0480061	0	0.0518208	0.0658054	-0.053524	-0.160297	-0.0516624	0	-0.207293	-0.128119	-0.0385761	-0.0217419	-0.0355701	0	0.11614	0.0860023	0.181736	0.136995
P08253	MMP2	72 kDa type IV collagenase	0	0.366817	0.23946	-0.124819	-0.547153	0.172642	0	-0.0604305	0.12085	-0.818932	-0.165249	-0.0540237	0	-0.455286	-0.935726	-0.212337	-0.342257	0.294579	0	-1.18843	0.0104465	-0.601952	-0.635414	-0.619148	0	-0.0602627	0.142036	0.126575	0.102787	-0.625641	0	0.219385	-0.10508	-0.0427017	-0.133471	-0.00102997	0	0.115108	0.918106	0.729847	-0.411741	0.147278	0	-0.0102959	-0.630028	-0.0226212	-0.540169
P08519	LPA	Apolipoprotein(a)	0	0.224442	0.211359	0.039278	-0.172762	0.210905	0	-0.0809898	-0.129429	-0.0508518	-0.525181	-0.00363159	0	-0.150366	-0.0167885	-0.186846	-0.176691	-0.171041	0	-0.320339	-0.358932	-0.276951	-0.139067	-0.0745735	0	0.155142	0.160568	0.156637	0.117607	0.112299	0	0.28096	-0.00838661	-0.0570278	0.140696	0.0781937	0	-0.253645	-0.147062	0.0254993	0.0826263	-0.1964	0	-0.108475	-0.010294	-0.0927181	-0.132389
P08571	CD14	Monocyte differentiation antigen CD14	0	-0.303616	-0.112864	-0.000490189	0.0913391	0.365101	0	-0.154623	0.1698	0.206739	0.0903797	0.272438	0	-0.0395451	-0.131454	0.00636864	-0.0226784	0.00559616	0	0.112455	0.0953159	-0.058588	0.0353718	0.0191555	0	0.220879	0.16008	0.265518	0.447266	0.0433331	0	-0.155504	0.0742302	0.0223465	-0.0268726	0.0126534	0	-0.0880966	0.101835	0.0871792	0.0889454	0.171116	0	0.174053	0.0684242	0.122942	0.117224
P08581	MET	Hepatocyte growth factor receptor	0	-0.0536919	0.0175781	-0.104691	0.273699	0.167807	0	-0.822285	0.305391	-0.114666	-0.301228	-0.293125	0	-0.346687	0.0495777	0.301794	0.161987	0.214151	0	0.356068	0.308891	0.46336	0.430302	0.4582	0	0.203341	0.218931	-0.153021	0.153732	0.0210323	0	-0.113241	0.0205421	-0.0385227	-0.0864391	0.0125198	0	0.301031	0.781956	0.520126	0.443907	0.739145	0	-0.099041	0.297846	0.335762	-0.0837479
P08603	CFH	Complement factor H	0	0.0355072	0.0245304	-0.00556564	0.0641403	0.043211	0	-0.0829544	-0.120756	-0.0832195	-0.136305	-0.0893993	0	-0.0308609	-0.0346069	-0.0909805	-0.0768452	-0.0409317	0	-0.161572	-0.168837	-0.154427	-0.156614	-0.149479	0	-0.219761	0.115229	-0.0479889	-0.0237713	0.102736	0	-0.0599613	-0.0480442	-0.0502605	0.00264549	0.00421906	0	-0.00424004	-0.0797024	-0.0669022	-0.0841694	-0.0146389	0	-0.150606	-0.120855	-0.109171	-0.169127
P08697	SERPINF2	Alpha-2-antiplasmin	0	-0.209082	-0.102156	-0.287642	-0.16799	-0.176161	0	0.112864	-0.0981045	-0.0742111	-0.0295029	0.0222816	0	0.0278511	-0.0253448	-0.149082	-0.0810108	0.115322	0	-0.0338516	-0.12266	-0.0914192	-0.0337048	0.0566635	0	0.0151176	-0.2355	-0.246487	-0.0575809	0.0656376	0	-0.0131035	-0.0192871	-0.117271	-0.000486374	0.0447655	0	-0.404692	-0.350544	-0.248714	-0.300591	-0.150202	0	0.173445	0.0533638	0.0747013	0.149834
P08709	F7	Coagulation factor VII	0	-0.00566482	-0.198544	-0.0333958	-0.0942802	-0.0211182	0	0.0437489	0.512367	-0.0654392	0.109396	0.195974	0	0.00781822	0.0162926	-0.365547	-0.176752	-0.080061	0	0.147707	-0.291189	-0.19606	0.227682	-0.114529	0	-0.19418	-0.258852	-0.195292	-0.274475	0.00212479	0	0.215544	0.185259	0.177763	0.0711193	0.342703	0	-0.137211	-0.0881195	-0.228476	-0.229094	-0.213919	0	-0.0708752	-0.231266	-0.1098	0.0638485
P08758	ANXA5	Annexin A5	0	-0.00764847	0.0150795	0.237499	0.0259933	0.270473	0	-0.0544872	-0.0641823	0.0299301	-0.178204	-0.107735	0	0.130096	0.0432301	0.173624	0.0575199	-0.0546799	0	0.24518	0.286106	0.249813	0.339104	0.370367	0	0.318541	0.13345	0.103266	0.151377	-0.0180817	0	-0.155773	0.0766563	0.0735893	0.0341072	0.0463562	0	-2.98255	0.116192	-3.8413	0.140156	0.0151062	0	0.0855598	0.0994987	0.221998	-4.88333
P09172	DBH	Dopamine beta-hydroxylase	0	0.434624	-0.0932713	0.0717373	-0.361378	0.606373	0	-0.212023	-0.0938435	0.0344849	-0.103872	-0.286116	0	-0.482092	-0.426414	0.0738316	-0.530058	0.0638962	0	-0.423376	-0.342237	-0.463589	-0.304581	-0.396137	0	-0.57984	-0.494028	-0.412617	-0.479872	-0.696301	0	-0.168234	-0.0542316	-0.224051	-0.176777	-0.26667	0	-0.198849	-0.073925	-0.557936	0.0456562	0.182764	0	-0.176746	0.229113	-0.332821	-0.252481
P09211	GSTP1	Glutathione S-transferase P	0	0.739611	0.727634	0.71372	0.288267	0.494829	0	-0.0251389	-0.227686	0.283989	-0.117664	-0.133167	0	-0.0915051	-0.0750217	-0.824196	-0.311768	-0.458258	0	-0.120438	-0.172817	-0.125168	-0.218739	-0.121233	0	0.0401287	-0.0377445	-0.293997	-0.18437	0.463327	0	0.0604496	-0.014986	-0.0519524	0.186867	0.0264301	0	-0.00283813	-0.33695	-0.101046	0.0588341	-0.332853	0	0.0939369	-0.507065	-0.231089	0.0563068
P09486	SPARC	SPARC	0	-0.43116	-0.254354	0.0298824	-0.383844	-0.520887	0	0.04632	0.148876	0.103802	0.0321407	-0.430716	0	-0.15654	0.0442352	-0.0538559	-0.121538	-0.111979	0	-0.126837	-0.22315	-0.103912	-0.0321598	-0.0291729	0	-0.0725746	-0.0586491	0.109262	0.224176	-0.00619698	0	0.18734	0.142982	-0.0916672	0.160011	0.183174	0	0.268101	0.198114	0.327074	0.2801	-0.232536	0	0.0774803	-0.16119	-0.0897999	-0.0314827
P09668	CTSH	Pro-cathepsin H	0	-0.440756	-0.143036	-0.398315	-0.397343	0.121704	0	-0.338997	1.01144	0.346931	0.535053	0.879673	0	-0.455004	-0.429588	-0.0623379	0.255779	-0.113422	0	-0.365923	-0.716949	-1.02072	-0.747698	-0.365519	0	-0.417179	0.150827	0.898779	0.256086	0.0613804	0	0.553419	0.66588	0.395412	0.772493	0.679235	0	0.64838	0.574718	0.457504	-0.210428	0.769882	0	-0.33012	-0.154295	-0.499985	-0.147837
P09871	C1S	Complement C1s subcomponent	0	0.0260944	-0.00603867	-0.0621395	-0.0498447	0.0103416	0	-0.0145283	0.00683212	-0.00530624	-0.0757465	0.0256577	0	0.0513706	-0.0564404	-0.00539589	-0.0248833	0.0841274	0	0.0492344	-0.0695248	-0.013813	-0.0537281	0.0353889	0	-0.0762577	-0.222681	-0.0642433	0.0336246	-0.00229454	0	-0.0311298	-0.0952282	-0.0438118	-0.056263	-0.00806236	0	-0.0114536	-0.0293407	-0.0285149	-0.0566597	0.0816021	0	0.0831909	0.108324	-0.0196075	-0.0113449
P09960	LTA4H	Leukotriene A-4 hydrolase	0	-0.0783443	0.20528	0.336191	0.213964	0.190832	0	0.102858	0.229057	0.0642471	0.0739098	0.148106	0	-0.22327	-0.331739	-0.180969	0.158115	-0.307419	0	0.768457	0.69072	0.845531	0.73233	0.737099	0	-0.300489	0.139761	0.114441	0.0411663	0.0763073	0	0.520481	0.364285	0.319408	0.369019	0.357506	0	0.115097	0.720285	0.505014	0.297525	0.433102	0	0.510214	-0.0987301	0.22435	0.413872
P0C0L4	C4A	Complement C4-A	0	0.252905	0.216427	0.315451	0.177778	0.22406	0	-0.242641	-0.111254	-0.174072	-0.13096	0.0260868	0	-0.0343895	0.517416	-0.236481	-0.024601	0.213686	0	-0.441238	-0.36347	-0.290319	-0.518263	-0.4802	0	-0.182558	0.372541	-0.327639	-0.0912113	0.477551	0	-0.190159	-0.170467	-0.323881	-0.214104	-0.121922	0	0.456463	0.294329	0.424839	0.864925	0.637825	0	-1.0109	-0.90452	-1.09601	-1.07178
P0C0L5	C4B	Complement C4-B	0	-0.0127373	-0.0413952	-0.0835247	-0.0895214	-0.0351067	0	-0.0981998	-0.17791	-0.116909	-0.106527	-0.0659142	0	-0.213158	0.132092	-0.342842	-0.30411	-0.034153	0	-0.307417	-0.335155	-0.384964	-0.329098	-0.344057	0	-0.0795479	0.312889	-0.163336	0.0143089	0.353834	0	-0.0752125	-0.155527	-0.144444	-0.066185	-0.0861568	0	0.109467	-0.0810966	-0.0516586	0.00974083	0.0472221	0	-0.730005	-0.809486	-0.79425	-0.797152
P0CG47	RPS27A	Polyubiquitin-B	0	0.201265	-1.10175	0.210121	0.256527	0.900312	0	0.885727	1.49592	0.700632	1.42694	1.20921	0	-0.710749	-2.37664	-2.05191	-1.04257	-1.07434	0	-0.124559	-1	0.112932	1.79669	0.619413	0	0.0733547	0.173275	-0.277529	-0.256136	2.37773	0	-0.518745	-0.144255	1.41978	-0.00855255	-0.152588	0	2.25933	2.51358	2.30258	2.13275	1.18766	0	-0.51899	-1.09151	-1.39829	-1.70482
P0DJI8	SAA1	Serum amyloid A-1 protein	0	-1.2511	-1.27332	-0.99357	-0.607595	1.25394	0	-0.193569	-0.263268	-0.541742	-0.123625	1.35738	0	-1.0644	-1.12722	-1.36453	-1.22462	-1.19482	0	-0.480679	-0.527424	-0.272396	-0.426928	-0.0585499	0	0.762928	0.847296	0.709127	0.678825	0.967703	0	-0.888794	-1.19189	-0.829393	-1.10129	-0.781517	0	0.0065918	0.257484	0.154163	0.154694	0.793213	0	0.616959	0.662533	0.80723	0.402697
P0DMV8	HSPA1A	Heat shock 70 kDa protein 1A	0	-0.0242367	0.0397797	-1.02682	-1.05188	-1.37304	0	-0.325382	-0.0770607	-0.368507	-0.0856514	-0.240728	0	0.152895	0.0108395	-0.343657	-0.319191	-0.0428925	0	-3.15638	-3.67922	-3.72081	-3.44239	-3.14693	0	0.289835	-0.247923	0.172466	0.395689	0.437996	0	0.206148	-0.29339	-0.307909	0.178875	-0.0592766	0	0.0180473	-0.293863	0.0387974	0.278845	0.0440102	0	-0.626953	-0.685272	-0.659613	-0.390587
P0DOY3	IGLC3	Immunoglobulin lambda constant 3	0	-0.124973	0.0328693	0.0882282	-0.00285339	-0.161837	0	0.0281982	0.0576363	0.105938	0.0921955	0.110229	0	-0.18318	-0.160524	-0.119259	-0.144009	0.0273762	0	-0.0412407	0.0325375	-0.126213	-0.162752	0.013998	0	0.0802231	-0.0230141	-0.000558853	0.0197811	-0.0357723	0	0.128965	0.0437145	0.0143108	0.0550613	0.0432568	0	0.312176	0.435637	0.491661	0.402584	0.213758	0	0.071167	0.171177	0.156626	0.0961132
P0DP01	IGHV1-8	Immunoglobulin heavy variable 1-8	0	0.032856	-0.0543156	-0.183393	0.175171	0.0235348	0	0.336792	0.421463	0.377567	0.267223	-0.0418339	0	0.330172	0.678629	1.52609	0.860739	0.390644	0	-0.303204	-0.301548	-0.269751	-0.0616398	0.324362	0	-0.570604	-0.11969	-0.270258	0.041687	0.171871	0	-0.894922	-0.240166	-0.0989571	-0.105633	0.0251884	0	-0.161154	0.486668	0.52791	0.176849	0.385075	0	0.14003	0.166979	0.145655	0.144598
P0DP23	CALM1	Calmodulin-1	0	-0.544552	-0.346125	-0.621155	-1.85299	-0.219353	0	0.0160446	0.529539	0.0413513	0.428856	-0.0122337	0	-0.0363007	-1.09135	0.0516911	0.432219	-0.0157757	0	-0.448231	-0.314276	0.19578	0.0527229	0.410515	0	-0.377033	0.166513	0.111391	-0.0569439	-0.00964165	0	0.289614	0.230223	-0.186991	-0.244804	-0.137972	0	-0.610594	-0.177139	-0.185822	-0.117958	0.0410385	0	-0.357216	1.47958	0.313585	0.221163
P10586	PTPRF	Receptor-type tyrosine-protein phosphatase F	0	-0.773897	-0.100782	-0.458477	-0.183079	0.157742	0	0.0271168	0.117949	-0.0567837	-0.400637	-0.143711	0	-0.0180168	0.198795	0.0371304	-0.157932	0.199034	0	-0.00595856	-0.479204	-0.523701	-0.349489	-0.48093	0	-0.161812	0.234148	-0.231176	-0.219612	0.0372963	0	-0.317005	-0.070982	-0.0838604	-0.0618248	-0.128807	0	0.41515	0.0598049	0.219137	-0.232311	0.244795	0	-0.563173	-0.0704651	0.0448971	-0.0103683
P10643	C7	Complement component C7	0	0.00310516	0.013586	-0.0150566	-0.0298729	-0.0363579	0	-0.0228481	-0.0353165	0.0300751	-0.0212421	-0.0449142	0	-0.0465927	-0.130934	-0.00536537	-0.0344677	0.00932121	0	-0.0170193	-0.0693398	-0.100147	-0.00134277	-0.0136909	0	0.00456619	-0.0263615	0.0373783	0.100924	0.0133858	0	-0.0787773	-0.0042038	-0.0319309	0.0163193	-0.000408173	0	-0.0303249	-0.00917053	-0.0534897	-0.0524864	-0.0653	0	-0.0274124	-0.0297928	0.0339088	-0.00940514
P10721	KIT	Mast/stem cell growth factor receptor Kit	0	0.000835419	-0.153816	0.227524	-0.0125275	0.0314713	0	0.151157	-0.170374	-0.381922	-0.119307	-0.151836	0	0.258631	0.0416908	0.267231	0.293495	0.330715	0	0.220114	0.148474	0.403105	0.217581	-0.321993	0	0.0612621	-0.0621586	-0.0881557	-0.261763	-0.276779	0	0.219292	0.173578	0.00842094	0.223444	0.0143394	0	0.496979	0.946083	0.735554	0.231834	0.301895	0	-0.209318	-0.258373	-0.0292225	-0.318913
P10909	CLU	Clusterin	0	0.0327282	-0.0179443	-0.0468369	0.0389175	0.072094	0	0.0443382	0.153275	0.0607491	0.0964127	0.0444183	0	-0.0239067	0.00409126	-0.0418797	-0.00449943	0.154577	0	0.000501633	0.0111485	-0.0582104	-0.0149155	-0.00214577	0	-0.179661	-0.228073	-0.213867	-0.106699	0.0465794	0	0.0120068	0.0199356	0.00285149	0.0579128	0.169453	0	-0.0807934	0.000139236	0.0362511	0.0251675	-0.0577888	0	0.133041	0.0651417	0.0344734	0.089119
P11021	HSPA5	Endoplasmic reticulum chaperone BiP	0	-0.343544	0.0521812	-0.0700951	-0.187654	-0.107901	0	0.140327	0.000852585	-0.133532	-0.0380192	0.123711	0	-0.169779	-0.273279	-0.148535	-0.287893	-0.249863	0	-0.149887	0.216782	-0.0151844	-0.020113	0.112572	0	0.127113	-0.23558	-0.0885944	0.155779	-0.393745	0	0.110296	-0.0253925	0.032732	0.0430641	0.0364723	0	-0.119814	0.284193	-0.0290775	-0.0820847	-0.284788	0	-0.011797	-0.189697	-0.0554333	-0.0149555
P11047	LAMC1	Laminin subunit gamma-1	0	-0.245972	-0.495289	0.282223	0.192347	0.566072	0	0.327051	0.537575	-0.10462	-0.115492	0.165098	0	-0.194498	0.365576	0.253176	0.156412	0.438955	0	-0.274118	-0.49934	0.187172	-0.484383	0.313761	0	-0.0815945	0.587992	0.234726	-0.482475	-0.18462	0	-0.81802	-0.0448017	-0.131325	0.0603104	0.0967445	0	0.117052	0.39636	0.0147324	1.00169	0.106066	0	0.266796	0.646679	0.800064	0.263084
P11142	HSPA8	Heat shock cognate 71 kDa protein	0	0.0021534	-0.256365	-0.396942	-0.09305	-0.0879669	0	0.0540695	-0.167103	0.0385227	-0.0413647	-0.18309	0	-0.124237	-0.128742	-0.407019	-0.17762	0.138863	0	0.0770779	-0.0459862	-0.0389309	0.117247	0.0060997	0	0.0841179	0.0468254	0.00721741	0.164343	0.144354	0	-0.0939751	-0.0765572	-0.172712	0.0773106	0.124472	0	0.522512	0.473948	0.436417	0.379622	0.551762	0	0.0635891	0.0292168	0.0392532	-0.0698719
P11226	MBL2	Mannose-binding protein C	0	0.198952	0.119377	-0.0123768	0.229607	0.549309	0	-0.0915451	-0.39813	-0.269613	-0.231176	-0.33268	0	-0.326683	0.0440693	-0.746155	-0.587276	-0.226839	0	-0.100544	-0.310818	-0.486019	-0.0911064	-0.105713	0	0.357	0.790298	0.257376	0.290987	0.204515	0	-0.0875225	-0.0546322	-0.182777	-0.420717	-0.0161381	0	-0.297153	-0.301258	-0.270761	-0.0710888	0.172373	0	0.311445	0.17592	0.359861	0.561934
P11597	CETP	Cholesteryl ester transfer protein	0	-0.276272	-0.322367	-0.407951	-0.406708	-0.330093	0	-0.133484	-0.0679531	-0.0411377	0.00107193	-0.0481091	0	-0.523935	-0.740143	-0.301012	0.125751	-0.0385933	0	0.31834	0.962318	0.888472	0.325121	0.0267143	0	-0.293192	-0.287598	0.152201	0.226034	0.111609	0	0.0626144	0.101505	-0.0141029	0.117231	0.173027	0	-0.600569	-0.695841	-0.516241	-0.203011	1.10292	0	-0.257898	-0.60746	-0.195051	-0.687946
P11717	IGF2R	Cation-independent mannose-6-phosphate receptor	0	0.062006	0.0110512	0.114326	-0.156351	-0.282728	0	-0.145803	0.0156136	0.0566273	-0.0923443	0.0305691	0	-0.159512	0.265926	-0.0897522	0.0109806	0.0214024	0	-0.211687	-0.613533	-0.370205	-0.503328	-0.462755	0	0.11692	0.0694275	0.124016	0.0179176	0.171883	0	0.0820217	0.105906	0.157352	0.10578	-0.0328293	0	-0.173609	0.0130272	-0.011179	-0.093153	-0.474154	0	0.109549	-0.12447	0.0461044	0.175795
P12109	COL6A1	Collagen alpha-1(VI) chain	0	-0.535271	0.00346756	-0.312883	0.424095	-0.095232	0	-0.130304	0.236319	-0.208784	-0.0960026	-0.0254688	0	0.28146	0.389206	0.366796	0.475512	0.808931	0	0.358065	0.148674	0.130756	0.120478	0.0300407	0	-0.417744	-0.317242	-0.516304	-0.479895	-1.28057	0	0.0177746	0.339588	0.123724	-0.0599861	-0.245993	0	-0.493771	-0.503422	-0.360649	-0.678949	-0.761696	0	0.436522	0.429184	0.180075	0.123516
P12111	COL6A3	Collagen alpha-3(VI) chain	0	0.207275	-0.137283	-0.128014	-0.126694	0.00290299	0	0.0534744	-0.058094	-0.0282307	-0.0371647	0.103045	0	-0.0626316	-0.113403	-0.00735474	-0.168875	-0.131701	0	-0.0231647	0.147236	0.0534306	0.232681	-0.00892639	0	-0.254257	-0.210348	-0.16243	-0.103725	-0.0912819	0	0.0381851	0.108719	-0.0352173	0.0833092	0.00332069	0	-0.0382023	0.0459805	0.300152	-0.138939	0.299809	0	-0.0366898	0.433409	0.0731182	0.00130272
P12259	F5	Coagulation factor V	0	0.119724	0.0758476	0.179121	0.0940113	0.0905933	0	-0.0210705	0.0882187	-0.049284	0.0341034	-0.00368881	0	-0.0791454	0.0212574	-0.0147781	0.0151768	0.151907	0	-0.102018	-0.314657	-0.162436	-0.0190601	-0.0977325	0	-0.146818	0.0831738	0.00886345	0.045166	-0.0710163	0	-0.0727921	-0.0192108	-0.0161037	-0.00425148	0.0522423	0	-0.0241756	0.0403404	0.0553493	-0.0192451	0.0666428	0	0.0623589	0.103001	0.108358	0.0451145
P12814	ACTN1	Alpha-actinin-1	0	-0.0257874	-0.153219	-0.0321846	-0.238476	-0.163683	0	-0.0966854	-0.117496	0.027874	-0.0616875	-0.0753269	0	-0.0720711	-0.0934296	-0.0384808	-0.0430813	0.0131855	0	-0.152004	-0.110851	-0.111286	-0.0755882	-0.0739441	0	0.0494308	-0.0100822	-0.106272	-0.00168419	0.0126438	0	-0.119181	0.00909615	-0.0220947	0.05653	0.0274792	0	0.178345	0.0952377	0.203445	0.304813	0.250177	0	0.0150547	-0.00440788	-0.0235806	-0.035368
P12821	ACE	Angiotensin-converting enzyme	0	0.0077343	0.0293846	0.110445	-0.164906	-0.0159435	0	-0.191589	-0.499205	-0.406797	-0.0893803	-0.0973587	0	-0.20682	-0.1534	-0.16576	-0.11389	-0.195168	0	-0.193567	-0.312458	-0.283079	-0.447105	-0.176636	0	-0.436485	-0.0468025	-0.0816727	0.0485954	-0.267584	0	-0.212612	0.0375385	-0.145905	-0.0033493	0.0532417	0	0.228361	-0.140331	0.126221	0.132206	0.337765	0	0.183678	0.0902634	-0.10383	-0.234562
P12830	CDH1	Cadherin-1	0	-0.450886	0.145626	-0.0380135	0.00122833	0.085844	0	-0.0638542	-0.0336418	-0.0402203	-0.0939198	-0.398626	0	0.158852	-0.31632	-0.158373	0.00626755	-0.429195	0	-0.192047	-0.0122776	-0.207754	-0.303249	-0.315348	0	-0.0931225	-0.34326	0.011179	-0.0178318	-0.169333	0	-0.00351143	-0.116114	-0.0451393	-0.493288	-0.175198	0	-0.0206852	0.0600986	0.0552063	0.0253391	-0.0120926	0	-0.0370293	0.16247	0.0444412	-0.671356
P12955	PEPD	Xaa-Pro dipeptidase	0	0.0365486	0.0603104	-0.0188408	-0.0915222	0.123241	0	-0.0144787	0.024601	0.0154476	-0.018259	0.0216732	0	0.142742	0.0226669	0.0931587	0.140707	0.00423622	0	0.232227	0.267099	0.19079	0.204609	0.176867	0	-0.20472	-0.197681	-0.0663147	0.0330944	-0.191326	0	-0.122528	-0.154921	-0.183338	-0.0733471	-0.0944309	0	-0.0796852	0.115965	0.000675201	-0.107557	0.0477695	0	0.289751	0.277924	0.242046	0.279022
P13489	RNH1	Ribonuclease inhibitor	0	0.185007	-0.368574	-0.176619	-0.66856	-0.785963	0	-0.29372	-0.514339	-0.146931	-0.428144	-0.496801	0	0.60759	0.966022	-0.526442	-0.179358	0.240835	0	-1.18212	-1.31809	-1.51482	-1.38139	-1.34957	0	0.81321	1.17758	0.081068	-0.148827	0.6884	0	0.26363	-0.0341282	-0.129564	0.341778	0.315823	0	-0.119835	-1.42848	-0.95565	-0.682823	-1.03694	0	-0.779354	-1.77505	-1.64445	-0.925362
P13591	NCAM1	Neural cell adhesion molecule 1	0	0.120602	0.268801	0.342941	0.258551	-0.0373993	0	0.169331	0.154215	0.279928	0.311777	0.0914001	0	0.117369	0.121021	-0.292011	-0.0533276	-0.263212	0	-0.122057	-0.358721	0.0257835	0.0429859	0.0477142	0	0.220205	0.0288696	0.260483	0.194244	0.0555325	0	0.171698	0.326052	0.28463	0.112997	0.255285	0	0.0560722	-0.473965	-0.299503	-0.0660858	-0.0930538	0	0.0377388	-0.143274	-0.194374	-0.0510406
P13645	KRT10	Keratin, type I cytoskeletal 10	0	0.0629463	0.0527134	0.0626812	0.0882626	0.0887241	0	0.0970383	0.136496	0.011076	-0.0234489	0.00658226	0	0.151751	-0.175152	-0.0957489	0.0415516	-0.163105	0	0.0992203	0.206795	0.0748692	-0.0556965	0.00283432	0	0.0854111	0.236792	0.0458508	0.226643	-0.140896	0	-0.104624	-0.32873	-0.0324039	-0.0154247	-0.0500565	0	0.397312	0.474289	0.377203	0.495916	0.51786	0	0.204355	0.258884	0.360785	0.270977
P13647	KRT5	Keratin, type II cytoskeletal 5	0	0.109831	0.06003	0.0394707	0.003479	0.0130196	0	-0.0598412	-0.154232	-0.223881	-0.07901	-0.0837135	0	0.133917	-0.0316143	-0.0177917	0.039402	-0.00956154	0	0.0530586	0.085743	-0.00528717	0.12995	-0.0539494	0	-0.00860214	-0.0717907	0.0255165	-0.063303	0.110712	0	0.0117188	-0.0474243	-0.0436325	0.00387383	-0.100698	0	0.203941	0.103367	0.159958	0.205948	0.118155	0	-0.180025	-0.00199699	-0.161676	-0.236311
P13671	C6	Complement component C6	0	0.11076	0.188782	0.187414	0.111704	0.230713	0	-0.102634	-0.0948982	-0.0896988	-0.0787811	-0.0553608	0	0.0365276	-0.044611	-0.0344868	0.0296803	0.0599136	0	-0.00104332	-0.0351887	-0.0350266	-0.0302238	-0.00878143	0	-0.150833	-0.121223	-0.113235	-0.0411148	-0.0173206	0	-0.0576744	-0.118435	-0.113783	-0.021534	0.0115585	0	-0.0251961	-0.00976372	-0.0568047	-0.106703	0.0248184	0	0.0500946	0.0513763	0.013216	-0.0149403
P13727	PRG2	Bone marrow proteoglycan	0	-0.608049	-0.105558	-0.550423	-0.833069	0.292828	0	-0.0520554	0.234716	0.0484238	-0.085289	0.0490913	0	-0.210033	0.873966	0.0960197	0.305019	0.080328	0	0.210329	0.292183	0.38331	-0.588783	-0.104691	0	-0.315113	-0.176544	-0.150105	0.113764	-0.113611	0	0.206572	0.0650215	0.040308	-0.177805	-0.13603	0	-0.486177	0.0342007	-0.0835018	-0.0810261	-0.662373	0	-0.392097	-0.354712	-0.728804	-0.446054
P13796	LCP1	Plastin-2	0	0.0194721	-0.0581741	-0.0592537	-0.23958	0.12388	0	-0.0329189	-0.187593	-0.0298595	-0.148041	-0.1604	0	0.0296135	0.0138512	0.149065	-0.0381889	0.220844	0	0.19356	0.381855	0.239056	0.280092	0.31955	0	0.137228	0.112026	0.146736	0.276476	0.109966	0	-0.258024	0.100872	-0.155935	-0.674103	-0.076395	0	-0.124142	-0.0851536	-0.076973	-0.0365543	-0.225813	0	-0.248037	-0.474415	-0.293331	-0.110191
P14151	SELL	L-selectin	0	0.164021	0.0778294	0.104399	-0.0547409	-0.182486	0	-0.0127659	0.0302105	-0.143219	-0.0389919	0.124208	0	0.0906315	0.15744	0.078764	0.259491	0.178795	0	0.164717	-0.0172997	0.149307	0.0736694	-0.0886326	0	-0.32811	-0.226711	-0.0971107	-0.329332	-0.125385	0	-0.420101	-0.35174	-0.192938	-0.0212345	-0.188231	0	0.0382633	0.0269394	0.0346985	-0.268517	-0.0251961	0	-0.301205	-0.063345	-0.213417	-0.162855
P14618	PKM	Pyruvate kinase PKM	0	0.275223	0.105511	0.307995	0.104364	0.202288	0	-0.232878	-0.199633	-0.103455	-0.152424	-0.204599	0	0.6654	0.47156	0.363729	0.337973	0.694979	0	0.12151	0.0554085	-0.267672	0.130995	0.110668	0	0.273699	0.20278	-0.0468159	0.229647	0.132078	0	0.55934	0.546074	0.18878	0.605686	0.630898	0	-0.150997	-0.143478	-0.0978622	-0.185112	-0.315161	0	0.739136	0.793283	-0.00826454	0.657593
P14625	HSP90B1	Endoplasmin	0	-0.123259	-0.20764	0.200541	-0.0121574	-0.045311	0	0.116249	0.192225	0.0503769	0.136864	0.239586	0	0.155321	0.237953	0.0739517	-0.00215912	0.2281	0	-0.420633	-0.271851	-0.230488	-0.148129	-0.204197	0	0.140657	0.17766	0.0333958	0.416002	-0.0395699	0	-0.155359	-0.0214043	0.110556	0.0182457	0.0153294	0	0.0639267	-0.0470104	0.0992393	-0.174234	0.210691	0	0.0645523	0.136707	0.234201	0.13608
P14923	JUP	Junction plakoglobin	0	1.51533	-0.546547	-1.1839	-0.204496	-0.201275	0	-0.914824	-0.20224	-0.0524673	0.286484	0.781988	0	-0.983303	-1.09456	-0.845947	0.181093	-0.828087	0	0.451868	0.241159	0.453451	1.12725	0.258364	0	-0.553923	0.887379	0.410404	-0.466881	0.617718	0	0.163717	0.186735	-1.05808	-0.74427	0.122492	0	-0.152447	-0.359646	0.154793	0.0759735	-0.893734	0	0.158438	-0.739063	-0.722496	0.0488052
P15144	ANPEP	Aminopeptidase N	0	-0.16518	-0.13369	-0.0575657	-0.247627	0.0261192	0	0.0644588	0.258577	0.0587082	0.056139	-0.0294971	0	0.204889	0.215263	0.0911942	0.220085	0.237429	0	-0.176376	-0.446301	-0.0820198	-0.0477619	-0.271255	0	0.0613136	0.0533581	0.125422	-0.142624	-0.110168	0	-0.0769196	0.204361	-0.124964	-0.0851517	-0.0310192	0	0.316326	0.100103	0.300505	0.167709	0.103798	0	0.12306	-0.112522	0.117559	0.0210915
P15151	PVR	Poliovirus receptor	0	0.020689	0.0735989	0.176125	0.0522423	0.0389957	0	0.00855446	-0.17688	-0.0400848	0.00995255	-0.0828381	0	-0.151621	-0.267855	-0.0773125	-0.167604	-0.0431633	0	0.116568	0.266809	0.283978	0.251768	0.118023	0	-0.720137	-0.0623207	0.0470791	0.0756931	-0.000705719	0	-0.0589619	0.0713196	-0.0191708	0.0337811	0.0147419	0	-0.859125	0.435556	0.555878	0.44483	0.402346	0	-0.0336323	0.114807	-0.770109	0.114296
P15169	CPN1	Carboxypeptidase N catalytic chain	0	0.248865	-0.187214	-0.129076	0.185677	0.47307	0	-0.548182	-0.258209	0.0935478	-0.20771	0.111172	0	-0.423672	-0.36981	-0.324274	-0.577238	-0.860136	0	-0.134602	0.228083	-0.0540981	-0.171629	0.31493	0	0.0981903	-0.526037	-0.194967	-0.0619717	0.144869	0	0.208878	0.230145	0.090292	0.34083	0.473417	0	0.215248	-0.0192585	0.315765	-0.153908	0.0722313	0	-0.0635929	-0.114782	-0.0229855	-0.0432739
P15531	NME1	Nucleoside diphosphate kinase A	0	0.531786	-0.0259933	0.07897	0.26063	0.228041	0	0.0554581	0.0327225	0.663336	-0.209393	-0.216789	0	0.142506	0.438433	-0.674562	-0.346264	-0.103262	0	-0.768778	-0.672022	-1.13407	-0.902697	-0.620153	0	-0.0114803	1.12569	0.502575	0.198009	-0.235573	0	1.0341	0.992134	0.602173	1.02077	0.885532	0	-0.398134	-0.366394	-0.329966	0.0233727	-0.2962	0	-0.793623	-0.532122	-0.483032	-0.908262
P15814	IGLL1	Immunoglobulin lambda-like polypeptide 1	0	-0.057991	0.00798607	0.0883617	0.0260735	0.102299	0	0.114632	0.108702	0.156063	0.0188026	0.10461	0	-0.0442619	-0.0310516	0.146423	0.0543613	-0.000265121	0	-0.0920544	-0.0132751	-0.0417805	-0.0493279	-0.125301	0	-0.148972	-0.00196266	0.0973167	0.117422	0.0916195	0	-0.00564766	0.0308819	-0.0120125	0.0145435	0.0156326	0	0.209278	0.774206	0.550421	0.453327	0.297977	0	-0.0325031	0.0960999	0.104662	0.0854034
P16070	CD44	CD44 antigen	0	-0.190758	-0.196077	-0.539848	-0.099123	-0.313162	0	0.0426216	0.0418739	-0.0997601	-0.106781	-0.153429	0	-0.0454273	-0.459681	-0.102125	-0.288454	-0.242065	0	0.23745	-0.177727	-0.109446	0.208685	0.0281658	0	-0.0819111	-0.560181	-0.312325	-0.0946445	-0.225515	0	0.0678253	-0.399162	0.00197601	-0.48526	-0.172531	0	-0.0267124	0.0571537	0.0575924	-0.0174637	0.030489	0	-0.263075	0.0850372	0.0296688	-0.238291
P16930	FAH	Fumarylacetoacetase	0	0.173403	-0.0770817	0.366861	0.0439167	-0.0789795	0	-0.443359	0.0872726	-0.352108	-0.232351	0.000829697	0	-0.35269	0.280115	-0.038105	-0.002285	-0.14612	0	0.0639725	-0.245304	-0.251612	-0.106575	-0.326674	0	0.3792	0.196421	-0.0339947	-0.0320282	-0.069809	0	0.313751	0.00191307	0.0979691	-0.181787	0.0175781	0	-0.0330105	0.414513	0.320404	0.281111	0.160809	0	-0.64703	-0.640137	-0.142944	-0.515471
P17174	GOT1	Aspartate aminotransferase, cytoplasmic	0	-0.0800514	-0.0785732	0.299246	0.263721	0.281918	0	-0.103802	-0.661009	0.0292625	-0.429342	-0.036047	0	-0.274635	-0.464073	0.121708	0.121145	0.36117	0	0.106476	0.148714	0.189957	0.127165	0.116714	0	-0.470945	0.0146427	-0.470785	0.0297489	-0.065197	0	-0.0367966	-0.345003	-0.57163	-0.228542	-0.692326	0	-0.185894	0.147804	-0.220547	0.176325	-0.178314	0	0.605164	0.569962	0.368826	0.284761
P17813	ENG	Endoglin	0	0.194637	0.363245	-0.0340557	0.0452347	0.180889	0	-0.113276	-0.187916	-1.07018	-0.338219	-0.0474644	0	0.266729	0.399731	0.306889	0.398523	0.353006	0	0.484903	0.416784	0.282345	0.417387	-0.00754738	0	0.196404	0.410604	0.273067	0.426741	0.282507	0	-0.0463104	-0.0481224	-0.166744	-0.0104866	0.153858	0	0.411905	-0.00977135	0.397541	0.44199	0.411716	0	-0.363499	0.412577	0.294558	0.343645
P17900	GM2A	Ganglioside GM2 activator	0	-0.187368	-0.322557	-0.360481	-0.252823	-0.346521	0	2.0349	2.01074	1.998	2.16563	1.98389	0	-0.176594	-0.0175323	0.162649	-0.294491	0.0293427	0	-0.618982	0.0413895	0.0828552	-2.14401	0.567345	0	-0.408398	-0.353191	-0.717075	-0.374901	-0.233982	0	-0.602791	-0.0872269	-0.216011	-0.0860977	0.00730324	0	-0.166218	-0.0343895	-0.0679855	-0.0730057	-0.268644	0	-0.180393	-0.717569	0.155422	0.391487
P17936	IGFBP3	Insulin-like growth factor-binding protein 3	0	-0.238926	0.280106	-0.421232	-0.349606	-0.391548	0	-0.138865	0.187496	0.288246	-0.0890408	0.215586	0	0.0700855	-0.34918	-0.049757	-0.131649	-0.0748177	0	0.0243969	0.209778	0.271425	0.0763645	0.113136	0	-0.00722313	-0.689192	0.0726128	-0.437952	-0.166458	0	0.191805	0.115183	0.289955	-0.0758076	-0.269386	0	-0.470858	-0.562212	-0.965586	-0.406509	-0.718832	0	0.695789	0.262045	0.241005	0.0558796
P18065	IGFBP2	Insulin-like growth factor-binding protein 2	0	-0.0631371	0.574512	0.582102	0.401676	0.727299	0	0.12517	0.116091	-0.138426	-0.478672	-0.604389	0	-0.643867	0.532883	-0.00247955	0.188786	0.27845	0	-0.621647	-0.421087	-0.262108	-0.477182	-0.340467	0	0.328323	-0.0642223	-0.0888176	-0.221203	-0.0407944	0	0.28701	-0.0205479	0.0111885	0.0190468	0.0623436	0	-0.479666	-1.72207	-0.957035	-0.404535	-0.798998	0	-0.603176	-0.499399	-0.299366	-0.117952
P18206	VCL	Vinculin	0	-0.0201607	0.0749397	0.140518	0.0999584	0.0192966	0	0.132019	0.0702839	0.106714	0.149767	0.0969143	0	0.035347	0.055582	0.0717182	-0.018013	-0.00596046	0	-0.00617599	0.150917	0.0689507	0.102135	-0.0356331	0	0.125326	-0.0693913	-0.0194798	0.0981159	0.00288582	0	0.116976	0.146769	0.103727	0.0250626	0.0566101	0	0.158184	0.222868	0.242985	0.0667477	0.10577	0	-0.0149422	0.148853	0.143122	0.00193977
P18428	LBP	Lipopolysaccharide-binding protein	0	-0.356956	-0.495047	-0.279398	-0.197914	0.398167	0	0.0548992	-0.0345554	-0.0642624	0.126593	0.373774	0	-0.231972	-0.380247	-0.622185	-0.365492	-0.0464687	0	-0.247837	-0.186161	-0.190538	-0.0836201	0.0146561	0	0.113733	0.124428	0.177425	0.303019	0.214157	0	-0.0244141	-0.142328	-0.166721	-0.0644436	0.0253048	0	-0.0486355	-0.0463829	0.2054	0.237988	0.720623	0	0.113058	0.241251	0.0893192	0.109295
P18669	PGAM1	Phosphoglycerate mutase 1	0	0.181425	0.127399	0.109529	-0.132946	0.000392914	0	-0.0442581	0.00849152	0.101433	-0.153618	-0.0814819	0	0.0284805	0.251842	-0.32515	-0.222048	0.00768661	0	-0.187653	-0.0155945	-0.210905	-0.0645351	-0.153273	0	0.0762558	0.337969	0.0428753	-0.153019	0.0872536	0	-0.148493	-0.0487957	-0.388557	0.0322876	0.132168	0	0.0854549	-0.176458	0.114717	0.0405426	0.0709171	0	-0.315571	-0.331968	-0.222832	-0.501915
P19021	PAM	Peptidyl-glycine alpha-amidating monooxygenase	0	-0.185875	-0.510078	-0.656008	-0.395487	0.0696545	0	1.27872	0.748838	0.772436	0.359123	0.0602474	0	-0.705326	-0.947466	-0.467869	-0.841618	-0.213326	0	0.134995	0.187555	0.197798	0.855558	0.259808	0	-0.501448	-0.0752468	-0.0966873	-0.222544	-0.00740242	0	0.169786	0.0774727	-0.0871372	0.23317	0.213842	0	-0.0636692	-0.171993	-0.450176	-0.74579	-0.269388	0	0.47847	0.552414	0.535048	0.56748
P19320	VCAM1	Vascular cell adhesion protein 1	0	0.0628796	0.262817	-0.108425	0.106346	0.230877	0	0.123232	0.187206	0.319618	0.215021	0.205341	0	0.0415382	-0.0629406	-0.145493	-0.0896931	-0.0542679	0	0.216536	0.121454	0.181227	0.0147667	0.177916	0	-0.230076	-0.0903378	-0.0509205	0.0163574	-0.0728512	0	0.0697422	-0.061142	0.0328369	0.0861416	-0.00844955	0	-0.304111	0.176548	0.130033	0.0643349	0.140577	0	-0.0338154	-0.110916	0.06814	0.0624523
P19652	ORM2	Alpha-1-acid glycoprotein 2	0	-0.0698624	0.0614986	0.0368423	-0.0561581	-0.0576878	0	-0.14176	-0.0505276	-0.087204	-0.0468616	-0.0228481	0	-0.0932293	-0.217495	-0.156284	-0.0353775	-0.180157	0	0.00761986	0.154739	0.0364418	0.0822201	0.0154095	0	0.0452232	0.0659084	-0.0409718	0.0274696	-0.00705147	0	-0.0107498	-0.0698223	-0.164326	-0.0893269	-0.135401	0	0.215595	0.496342	0.505783	0.386488	0.6448	0	-0.0343914	0.181404	0.12966	0.0202923
P19823	ITIH2	Inter-alpha-trypsin inhibitor heavy chain H2	0	-0.0692177	-0.0312767	-0.0435467	-0.0625839	-0.0546169	0	0.0311565	0.0669136	0.0506706	-0.0197144	0.0667343	0	0.143032	0.0194874	0.0310459	0.0532169	0.0648975	0	0.200773	0.170267	0.198984	0.175255	0.235775	0	-0.115225	-0.301258	-0.195839	-0.114376	-0.185776	0	0.023241	-0.021059	-0.0148602	0.0161095	0.00495338	0	0.0130615	0.136063	0.0826206	0.0265312	0.0168037	0	0.0843601	0.140095	0.171354	0.0926781
P19827	ITIH1	Inter-alpha-trypsin inhibitor heavy chain H1	0	-0.0655499	-0.0652332	-0.095665	-0.092823	0.00852203	0	0.0164986	-0.0370598	-0.0189571	-0.0363255	-0.0253887	0	0.0352669	-0.0575867	0.00374603	-0.00595093	-0.032156	0	0.133701	0.150179	0.0825768	0.12048	0.148628	0	-0.124447	-0.26437	-0.162365	-0.0696945	-0.094553	0	0.0166492	0.0213032	0.0231476	0.0785122	0.0499516	0	-0.0397434	0.0140743	-0.0162392	-0.0698795	-0.0231915	0	0.0644627	0.0729179	0.113684	0.0616283
P20742	PZP	Pregnancy zone protein	0	0.0126686	0.0624523	0.0796947	-0.0129299	0.0986443	0	0.00492859	-0.0784779	-0.0884991	-0.098505	-0.141029	0	-0.10445	-0.0555229	-0.265804	-0.0899868	0.0480442	0	-0.145229	0.068718	0.047533	0.045393	-0.0413208	0	-0.023428	-0.143793	-0.0940437	-0.13685	-0.229094	0	-0.0721836	-0.0875645	-0.0651188	0.0108604	0.0475349	0	0.0747166	0.113998	-0.0592976	-0.0531654	0.183531	0	-0.0103703	0.018261	0.0430775	0.17415
P20851	C4BPB	C4b-binding protein beta chain	0	-0.115997	-0.0702591	-0.0476971	0.0342541	-0.00352478	0	-0.0538998	0.0780602	0.0201912	0.125937	0.0823746	0	0.0105457	0.342031	-0.248224	-0.31007	0.0875416	0	-0.544268	-0.572145	-0.66094	-0.566198	-0.541832	0	-0.0419312	0.585594	0.00706863	-0.173311	0.55035	0	-0.0509167	-0.0423183	0.0268116	0.0245247	-0.0480804	0	0.246305	0.103504	0.104229	0.015501	0.0399475	0	-0.798157	-0.717113	-0.680752	-0.748493
P21333	FLNA	Filamin-A	0	0.036747	-0.000778198	0.0616894	0.0784473	-0.0205479	0	0.0332718	0.121794	0.0519066	0.103775	0.131184	0	-0.0378437	-0.0671253	0.0314274	0.0395069	0.0168896	0	0.0246506	0.0833359	0.067894	-0.0185108	0.0294075	0	-0.128788	-0.092123	-0.053215	0.0176258	-0.11249	0	0.0148735	0.133612	0.144157	0.0515823	-0.00224495	0	-0.0206089	0.244287	0.284906	0.0972786	0.124556	0	0.174711	0.208418	0.218065	0.215538
P22105	TNXB	Tenascin-X	0	0.0697842	0.115898	0.0696411	0.0727367	0.244347	0	0.0174713	0.0180187	-0.0824051	-0.110048	-0.0215836	0	0.0848923	-0.238634	0.00778389	-0.0218105	-0.08494	0	0.0289326	0.00158882	-0.0687294	0.0603218	0.0182762	0	0.173	-0.0574741	0.0685501	-0.0535698	-0.110853	0	0.146347	0.141886	-0.0575104	0.0366898	0.0559731	0	0.190643	0.376455	0.197414	0.247236	-0.0250187	0	-0.0412693	0.148792	0.0481892	0.0585899
P22352	GPX3	Glutathione peroxidase 3	0	0.139	0.12348	0.0385227	0.0529366	0.0991611	0	-0.0345745	-0.198612	-0.0851974	-0.0862141	-0.0612698	0	-0.247856	-0.312269	-0.296902	-0.218801	-0.271606	0	-0.195993	-0.136332	-0.0170422	-0.0639381	-0.098299	0	-0.0170918	-0.00779533	-0.0309505	0.139612	-0.100515	0	-0.0998764	-0.011404	-0.0251045	0.0143929	-0.114494	0	-0.201897	-0.385027	-0.264359	-0.232948	-0.410452	0	0.137402	0.315136	0.157049	0.293304
P22692	IGFBP4	Insulin-like growth factor-binding protein 4	0	-1.16835	-1.55319	-1.41521	-1.55032	-1.58047	0	-0.0664005	-0.00113869	0.0538692	-0.444567	-0.202066	0	-0.0597954	0.40589	-0.472404	-0.0803604	0.243265	0	-0.525728	-0.227753	-0.300785	-0.47703	-0.403311	0	0.0586624	0.058176	-0.213903	-0.170624	0.103584	0	0.30616	0.0277367	-0.318338	-0.111462	-0.218756	0	0.116381	0.0461044	0.512789	-0.117908	-0.0557384	0	-0.59428	-0.644152	-0.198656	0.1989
P22792	CPN2	Carboxypeptidase N subunit 2	0	-0.0895615	-0.0806236	-0.0687008	-0.240717	-0.100039	0	0.0468521	-0.0278225	-0.0368347	-0.00312805	-0.0020237	0	-0.0828552	-0.208679	-0.284378	-0.172012	-0.303282	0	0.058094	0.0813522	-0.0231304	0.0267048	0.0120163	0	0.0737839	-0.0284576	-0.049387	-0.0322495	-0.0957012	0	-0.0550327	-0.0844059	-0.124142	-0.0140553	-0.0309353	0	-0.0318584	-0.0760155	-0.0392513	-0.0555439	0.00117683	0	0.171892	0.113283	0.078249	0.147179
P22891	PROZ	Vitamin K-dependent protein Z	0	-0.71031	-0.623453	-0.674585	0.00345612	0.115393	0	0.231583	0.248728	-0.129826	-0.0333576	0.295498	0	-0.164772	-0.147873	-0.0505219	-0.0330887	-0.152679	0	0.208008	0.329817	0.415518	0.377371	0.29253	0	-0.486675	-0.404375	-0.371881	-0.280521	-0.365269	0	-0.123901	0.0436211	0.143829	-0.0663033	0.0809441	0	-0.228777	0.0276012	-0.0267544	-0.367323	-0.309191	0	0.260359	0.205856	0.169714	0.111834
P22897	MRC1	Macrophage mannose receptor 1	0	-0.190872	0.220938	-0.174183	0.135374	0.132183	0	0.383736	0.608892	0.277998	0.528902	0.571815	0	0.259035	0.179676	0.525131	0.0790138	0.402979	0	-0.341599	-0.00890923	0.217571	-0.200924	0.0658188	0	-0.284681	-0.776754	-0.331438	-0.0640106	-0.0811539	0	-0.13319	0.159521	0.168173	0.123024	0.154819	0	0.194973	0.412773	0.56201	-0.0230503	0.297915	0	-0.158194	0.0372887	0.0298252	0.0238476
P23083	IGHV1-2	Immunoglobulin heavy variable 1-2	0	-0.0870209	-0.276926	-0.117195	-0.359364	-0.231327	0	0.00907516	-0.0367203	-0.0560436	0.0365524	-0.106287	0	0.221739	0.198994	0.0727501	0.284088	0.508982	0	-0.401442	0.00852013	-0.218956	0.135981	-0.391911	0	-0.00296974	-0.0166683	-0.120747	-0.0639858	-0.0384216	0	-0.0375633	-0.0670567	-0.0911827	0.0101032	-0.0368023	0	0.365683	0.250179	0.403023	0.290991	0.280422	0	0.03549	0.0660744	0.000480652	0.131643
P23142	FBLN1	Fibulin-1	0	-0.056818	-0.110216	0.0492935	-0.0920563	-0.0280075	0	0.0138683	-0.0415649	0.00288391	0.0173721	-0.158541	0	0.207022	0.105923	0.195181	0.170614	0.142487	0	-0.0162487	0.0541344	0.00500107	-0.0225563	-0.0864029	0	0.0811405	0.220013	0.19088	0.155857	0.105154	0	-0.0827389	-0.0393829	-0.0703487	0.00910187	-0.000658035	0	0.0558033	0.0995731	0.109266	0.130716	0.0652676	0	-0.0580101	-0.11742	-0.122124	-0.108566
P23284	PPIB	Peptidyl-prolyl cis-trans isomerase B	0	0.173203	-0.0141964	0.303272	0.232664	-0.0969658	0	-0.0335331	0.324837	-0.0927467	-0.0129604	0.0587387	0	-0.393501	0.142664	0.0100307	-0.00970078	0.123039	0	-0.531591	-0.190878	-0.343597	-0.307623	-0.495697	0	-0.0997086	0.127998	0.363499	0.345726	-0.716797	0	-0.4284	0.284288	0.154593	0.141479	-0.424835	0	0.238018	0.759686	1.76059	0.435646	0.77364	0	0.231865	1.60831	0.831139	0.410166
P23528	CFL1	Cofilin-1	0	0.0500584	0.105019	-0.0461102	-0.225748	-0.127148	0	0.393944	0.170631	0.427048	-0.502222	-0.250572	0	0.159698	0.121567	0.175488	-0.13802	0.185638	0	0.164244	0.0131264	0.182884	0.0797482	-0.00248718	0	-0.900421	0.134295	0.165157	-0.315796	-0.360853	0	0.338533	0.272573	0.47768	0.450571	0.44142	0	-1.06985	-0.935419	-0.859646	-0.228695	-1.30361	0	0.641565	-0.0680904	-0.134069	-0.727211
P24821	TNC	Tenascin	0	0.032444	-0.0763264	-0.119314	-0.133808	0.107365	0	0.0767727	0.0578098	0.129698	0.0202198	0.0167141	0	-0.103165	-0.0286713	-0.168705	-0.230185	-0.0883427	0	0.0370979	-0.0434685	-0.112915	0.0180531	-0.177017	0	0.0622139	0.0622902	-0.128576	0.119921	-0.0964375	0	-0.00891495	-0.0268269	0.00710487	-0.0880833	-0.00044632	0	-0.336084	0.0157642	0.0135708	-0.0196247	0.0410557	0	0.0713406	0.198902	0.114763	0.0927715
P25311	AZGP1	Zinc-alpha-2-glycoprotein	0	0.0386238	0.0454979	0.0255222	-0.0114098	0.0240421	0	0.0313244	0.0565338	0.0084362	-0.0289307	0.0338211	0	0.207632	0.12326	0.2174	0.194487	0.233988	0	0.0960846	0.102758	0.0726395	0.0461845	0.151585	0	-0.0560646	-0.0356674	-0.0387955	-0.0257854	0.0564613	0	-0.00179863	-0.0239887	-0.155848	-0.0795097	0.00624466	0	-0.14097	-0.186419	-0.167313	-0.205044	-0.147491	0	0.117861	0.263256	0.256567	0.134531
P26038	MSN	Moesin	0	0.0177288	0.152042	-0.177168	-0.448236	-0.121262	0	-0.0339355	-0.0279102	-0.147427	0.202322	-0.140547	0	0.175266	0.361252	0.237467	0.109653	0.276381	0	-0.0705376	0.109989	-0.143454	-0.218019	-0.296844	0	-0.225496	-0.115536	0.10594	-0.0678539	-0.128004	0	0.198128	0.102795	0.012476	-0.0759182	-0.0721569	0	-0.0889111	0.202663	0.233498	-0.0917854	0.28038	0	0.0924072	0.32135	0.234741	0.241997
P26927	MST1	Hepatocyte growth factor-like protein	0	0.162735	0.0530968	-0.153872	0.0490456	0.146078	0	-0.031559	-0.37645	0.04035	-0.0618534	-0.0368519	0	0.249378	0.505486	-0.00764275	-0.0370903	0.472914	0	-0.46673	-0.62797	-0.958422	-0.902325	-0.575169	0	-0.18951	0.872494	0.387203	0.0805035	0.479994	0	-0.140024	-0.0933914	0.0167007	0.000656128	-0.299988	0	0.0958042	-0.126711	-0.0644302	-0.341597	-0.770126	0	-0.492733	-0.774366	-0.862608	-1.09003
P27169	PON1	Serum paraoxonase/arylesterase 1	0	-0.0901699	-0.0167484	0.00995255	0.0118561	-0.012022	0	0.0147476	0.0335369	0.0450745	0.0503235	-0.00447273	0	0.104145	-0.082201	0.039341	0.031929	-0.0474777	0	0.000522614	0.141869	0.157963	0.179775	0.147541	0	-0.0255775	-0.0908184	-0.0608063	0.00165176	-0.10594	0	0.146736	0.0177917	-0.00926971	-0.0363522	0.0253563	0	0.0743599	0.27887	0.252222	0.161024	0.156424	0	0.112698	0.14957	0.160042	0.0572376
P27487	DPP4	Dipeptidyl peptidase 4	0	0.00693893	-0.536453	0.419455	0.548523	0.00605393	0	-0.136551	0.0340405	0.00875473	-0.408195	-0.338028	0	-0.714111	-0.753025	-0.886145	-1.12543	-1.03432	0	-0.489323	-0.229288	-0.495186	-0.523626	-0.602282	0	0.368572	1.02176	0.390778	0.704039	0.788673	0	0.446377	0.113777	0.0694122	0.245041	0.190969	0	-0.483971	-0.313473	-0.599157	-0.136694	-0.528244	0	-0.264891	-0.17296	-0.612585	-0.335608
P27797	CALR	Calreticulin	0	0.390976	-0.00968933	0.393887	-0.229548	0.317135	0	0.27334	0.310907	0.308256	0.352797	0.16802	0	-0.00322914	0.0303421	-0.458523	-0.502171	-0.229118	0	-0.77301	-0.765362	-0.495749	-1.32344	-0.760229	0	-0.434977	0.420456	0.678303	0.371252	0.400209	0	-0.0235653	0.239527	0.442375	0.350134	0.653595	0	0.0743637	0.152843	0.242304	0.813335	0.510927	0	0.269249	-0.412333	0.22533	-0.0644798
P27918	CFP	Properdin	0	-0.148144	0.0458584	0.0359077	0.0982647	-0.114368	0	-0.0954895	-0.0820637	-0.0129108	0.0356808	0.0563908	0	-0.0530071	-0.108223	0.0963116	-0.0907574	-0.173687	0	0.137716	-0.0225201	-0.042244	0.0943871	-0.0794392	0	-0.127827	0.0709896	-0.0353146	-0.0484352	0.0580254	0	-0.166334	-0.101315	-0.121178	-0.112143	0.0664024	0	0.0458908	-0.0617733	-0.168867	-0.0684776	-0.293407	0	-0.164406	-0.188862	-0.187073	-0.237354
P28827	PTPRM	Receptor-type tyrosine-protein phosphatase mu	0	-0.539503	-0.409603	0.207569	0.337902	0.298363	0	-0.457718	0.00868988	0.196211	-0.783957	0.0797195	0	0.352839	0.43751	0.410622	0.546007	0.293066	0	-1.07635	0.0575676	-0.217636	-0.756721	0.0295353	0	0.12076	0.0925446	0.194195	0.208971	0.0434799	0	0.011507	-0.108301	-0.211096	-0.131508	0.177912	0	-0.0524864	-0.0528049	0.0773144	-0.666458	-0.679062	0	-0.304861	0.573025	0.282345	0.0959988
P29401	TKT	Transketolase	0	0.244583	0.0634613	0.131208	-0.00176239	0.0234909	0	0.355602	0.19412	0.174467	0.106451	0.0548897	0	0.0462933	-0.218102	-0.0925407	0.11305	-0.0687904	0	0.0702114	0.149887	-0.147581	-0.0994034	-0.355232	0	0.266943	0.029192	0.11475	0.273882	-0.120728	0	-0.126377	-0.00961113	0.00394058	-0.0294838	-0.0867882	0	0.0840378	0.348572	0.287844	0.223797	0.214769	0	0.182232	0.0823135	0.111881	0.0510044
P29508	SERPINB3	Serpin B3	0	0.193073	0.258959	0.278315	0.236341	0.175737	0	0.124439	0.189093	-0.0743294	0.102182	0.104328	0	-0.211676	-0.27623	-0.301115	-0.0770531	-0.157459	0	0.192863	0.377615	0.203114	0.290796	0.20195	0	-0.0310974	-0.0375748	-0.0103836	0.0461273	-0.133896	0	-0.181162	-0.17766	0.0987091	-0.0786037	-0.205486	0	-0.135403	0.203136	0.0927639	0.111828	0.0672512	0	0.224483	0.472027	0.268614	0.268614
P29622	SERPINA4	Kallistatin	0	0.193361	0.00512886	-0.00930214	-0.138939	-0.211073	0	-0.0475273	-0.341352	-0.0607567	-0.184896	-0.149029	0	0.0740795	0.119192	-0.123533	0.0985832	0.135752	0	0.221188	0.0837536	-0.0568657	0.032177	0.0550613	0	-0.0208416	0.0681629	-0.00908852	-0.0748482	0.10388	0	-0.205025	-0.126095	-0.288307	-0.0868378	-0.118126	0	-0.136753	-0.357584	-0.142683	-0.0418625	-0.133358	0	0.28688	0.00656891	0.0647182	0.167366
P30086	PEBP1	Phosphatidylethanolamine-binding protein 1	0	1.36774	1.31215	1.30369	1.33396	0.956888	0	-0.197428	-0.436993	-0.312006	-0.19326	-0.178471	0	0.159107	-0.325203	-0.0690041	0.147015	-0.302481	0	-0.418062	0.114113	0.0695057	-0.162447	0.234011	0	0.369473	0.250544	-0.168013	0.416971	0.477556	0	-1.46719	-0.204231	-0.682928	-0.24332	-0.106131	0	-2.2892	-1.15531	-1.27771	-2.07238	-0.0432301	0	1.32095	0.645256	1.24779	1.34648
P30101	PDIA3	Protein disulfide-isomerase A3	0	-0.0365467	0.0232964	0.218678	0.0529194	-0.155161	0	-0.0203552	-0.282646	-0.0437126	-0.192728	-0.129091	0	0.0528641	0.00336266	-0.0555058	-0.0505867	0.0104713	0	-0.31974	-0.144434	-0.122017	-0.186174	-0.029314	0	-0.204407	-0.0281563	-0.0449486	0.115116	0.0988846	0	-0.0953026	0.0732212	-0.0595608	-0.0500374	0.00208855	0	-0.0977879	0.247517	0.32427	0.261154	0.0083065	0	0.164663	0.156935	0.21261	0.242937
P30740	SERPINB1	Leukocyte elastase inhibitor	0	0.17029	0.0789032	0.167164	-0.0368824	0.0977097	0	-0.0524101	-0.0134888	-0.0306549	-0.0296059	-0.853508	0	0.277658	0.369387	0.382788	0.295197	0.315695	0	0.029562	0.0760307	0.0402508	0.0581436	-0.0267754	0	-0.248022	0.017643	0.0488758	0.0328407	-0.161978	0	-0.200203	0.0445442	0.0559464	0.0817184	-0.0639	0	0.173464	0.108711	0.138069	0.29822	0.325108	0	0.122442	0.176691	0.207651	0.0762615
P31025	LCN1	Lipocalin-1	0	-0.132471	-0.125509	-0.212105	-0.485304	-0.308947	0	-0.30298	-0.397469	-0.08218	-0.334446	-0.254602	0	0.0891571	-0.0670033	-0.00244522	0.248447	-0.143312	0	0.162552	-0.0199013	-0.026783	-0.104536	-0.154398	0	-0.365158	-0.364576	-0.459286	-0.298351	-0.398712	0	0.0021534	0.0909748	0.0198231	0.120197	0.159985	0	-0.0187912	-0.361687	0.0147495	-0.592474	-0.337122	0	0.0174923	0.0859222	0.326843	0.016571
P31146	CORO1A	Coronin-1A	0	-0.346241	-0.526196	-0.641848	-0.601814	-0.810787	0	-0.143501	0.0177898	-0.238703	-0.0241623	0.263632	0	-0.573374	-0.759609	-0.254198	-0.266405	-0.184885	0	-0.308205	-0.14031	-0.253466	-0.144833	-0.199631	0	0.146927	-0.152294	-0.712042	-0.0857525	0.0488644	0	0.211483	0.333487	0.120163	-0.159721	0.1675	0	1.68649	1.31085	1.58583	1.72987	1.60515	0	-0.178797	0.181055	-0.129124	-0.623259
P31944	CASP14	Caspase-14	0	-0.738283	-0.122709	-0.0293427	0.135134	0.058876	0	0.0315933	-0.770887	-0.210489	0.573872	0.62282	0	-0.137175	-0.868263	-0.402334	0.090353	-1.16108	0	0.0191021	0.632633	0.570469	0.642921	0.294596	0	-0.317183	-0.403833	-0.186789	0.0386181	-0.499681	0	0.212963	0.183931	0.429272	0.343136	0.231701	0	0.845446	1.30177	1.30187	1.40533	1.0151	0	0.947136	1.42135	1.05444	1.215
P32004	L1CAM	Neural cell adhesion molecule L1	0	-0.103527	0.139284	0.198858	1.21928	-1.35405	0	0.201004	0.476389	0.433584	0.229498	0.0904331	0	0.581129	0.574947	0.784994	0.397293	0.39115	0	0.428581	0.576439	0.44994	0.633114	0.143925	0	0.425611	-0.143539	0.23727	-0.323452	0.460665	0	1.10022	0.14868	0.0958424	-0.641306	0.0459423	0	-1.59094	0.336733	0.166851	0.381275	0.230536	0	-0.154711	-0.464285	-0.611216	-0.01581
P32119	PRDX2	Peroxiredoxin-2	0	-1.17881	-1.03704	-1.11938	-0.988531	-0.98588	0	-0.104465	0.857407	-0.109173	0.201639	0.860727	0	-0.260542	0.10198	0.122625	-0.158888	0.0620327	0	-0.695095	-0.262594	-0.256933	-0.126848	-0.21769	0	0.00222015	-0.0549984	0.232166	0.275854	0.0602226	0	0.133759	0.610456	0.291727	0.0348644	0.0138988	0	0.0515995	0.143669	0.178547	0.366817	-0.0387745	0	-0.220417	1.4398	-0.0372372	-0.307501
P33151	CDH5	Cadherin-5	0	-0.258291	0.0677013	-0.0143967	-0.0599117	0.0193691	0	-0.052742	-0.0601101	0.0279236	0.156593	-0.344412	0	0.345055	0.0397015	0.273386	0.400675	0.452021	0	-0.0792236	-0.0414963	0.00358009	-0.298813	-0.410915	0	0.0283356	-0.0691414	-0.0117741	0.403427	0.0096302	0	-0.0450897	-0.00600052	0.0831146	0.0547276	-0.111475	0	0.0773602	0.549025	0.569071	0.381739	-0.445684	0	-0.229181	0.0656185	0.110313	0.51
P35527	KRT9	Keratin, type I cytoskeletal 9	0	0.187906	0.169886	0.365929	0.0827751	0.450336	0	0.00522804	-0.0547447	-0.0996876	-0.125677	-0.304235	0	-0.0640144	-0.0558815	0.0191631	-0.0624485	0.0257359	0	0.0227013	0.0323257	0.142992	0.130276	0.182545	0	-0.182333	-0.117014	-0.108595	-0.126965	-0.249886	0	-0.0293179	0.00148201	0.0430679	-0.012146	-0.0422554	0	-0.0645676	0.0373154	0.169212	0.135597	0.0800362	0	-0.0931835	-0.0820656	-0.18371	-0.202221
P35542	SAA4	Serum amyloid A-4 protein	0	0.0349426	0.152458	0.183746	0.0292873	0.0350914	0	0.053894	-0.0106869	0.0340443	-0.0583344	-0.00872612	0	-0.253721	-0.32757	-0.203077	-0.357546	-0.388571	0	-0.0562363	-0.0546589	-0.0229492	-0.0626183	-0.103367	0	0.2913	0.210289	0.227873	0.205572	0.00988579	0	0.0675068	0.144445	-0.0248127	-0.0877304	0.046896	0	0.235857	0.254726	0.286304	0.197989	0.29003	0	0.158136	0.343401	0.460829	0.256224
P35555	FBN1	Fibrillin-1	0	-0.0798473	-0.131935	-0.088459	-0.0312138	0.317814	0	0.383171	-0.304621	-0.532185	-0.111809	0.0427017	0	0.281084	0.526205	-0.16564	0.132223	0.133135	0	-1.04613	-0.708345	-1.20203	-1.1487	-1.12719	0	-0.0471821	-0.184515	-0.0216541	-0.290319	-0.12854	0	0.235697	0.0648289	-0.0821056	0.137939	-0.0938377	0	-0.562897	-0.106443	-0.400349	-0.364758	-0.370277	0	0.159901	0.137642	0.329836	-0.354008
P35579	MYH9	Myosin-9	0	0.0248566	-0.00546837	0.0630684	0.00229073	-0.0196934	0	0.0744438	-0.00545883	0.0412769	0.0818233	0.0668602	0	0.0155602	0.0039978	0.0717812	-0.0293255	0.0383434	0	0.0229034	0.00961685	0.0921993	-0.0398045	-0.0709152	0	-0.00726509	-0.0304794	0.020607	0.156919	0.0416775	0	-0.0615501	0.0109558	-0.162003	-0.137571	-0.0254383	0	-0.0174694	0.125124	0.0748158	0.0308495	-0.0674057	0	-0.153723	-0.0272484	-0.102652	-0.0508232
P35858	IGFALS	Insulin-like growth factor-binding protein complex acid labile subunit	0	0.057972	0.0218372	0.0486031	-0.120714	0.0145721	0	0.0631962	-0.179245	-0.06147	-0.0828571	-0.0537796	0	0.250921	0.211271	-0.0482864	0.128489	0.143789	0	0.138643	0.0326252	0.0253391	-0.00125885	0.121529	0	-0.0400448	-0.225121	-0.296938	-0.150551	-0.073864	0	0.0695114	0.00351524	-0.0487957	0.133957	0.0887985	0	-0.117956	-0.197956	-0.100405	-0.104254	-0.107088	0	0.307878	0.216906	0.204714	0.154324
P35908	KRT2	Keratin, type II cytoskeletal 2 epidermal	0	0.0403957	0.101667	0.176975	0.19776	0.238659	0	-0.111443	-0.159561	-0.0289421	0.0164089	-0.256363	0	0.0315228	0.239391	0.239744	0.197569	0.277473	0	-0.519882	-0.234058	-0.336857	-0.44714	-0.346066	0	-0.139544	0.555605	0.186653	0.0723019	0.13195	0	-0.0796394	0.0761642	0.0131321	0.0389709	-0.159906	0	-0.182459	-0.0984669	-0.147009	-0.167448	-0.222897	0	-0.366478	-0.296066	-0.324846	-0.0594311
P35916	FLT4	Vascular endothelial growth factor receptor 3	0	-0.031435	0.0880833	0.0801849	-0.20306	0.11655	0	-0.286316	-0.148483	-0.167173	-0.0723152	-0.253323	0	-0.108509	-0.681061	-0.218349	-0.172771	-0.0953712	0	-0.156185	-0.25676	-0.15855	-0.821524	-0.0781174	0	0.22414	-0.115919	-0.120487	-0.0694332	-0.498299	0	0.0274811	0.138596	0.148951	-0.000787735	0.155897	0	-0.0184536	0.245806	-0.00937843	0.105654	0.744045	0	-0.201242	0.0468616	0.199732	0.0784912
P36955	SERPINF1	Pigment epithelium-derived factor	0	-0.103971	-0.115021	-0.19408	-0.198338	0.0431843	0	0.0811749	-0.0272331	-0.0221119	0.00995255	0.139528	0	0.193968	-0.0482311	0.0663395	0.258144	0.11771	0	0.21249	0.285629	0.187157	0.193666	0.204796	0	0.0053215	0.105936	0.198729	0.159782	0.0749359	0	-0.0294952	-0.045063	-0.0574989	-0.00591087	-0.0395412	0	-0.115126	-0.0371418	-0.02318	-0.0369835	-0.012722	0	-0.0046196	-0.0154152	0.141281	0.0485859
P36980	CFHR2	Complement factor H-related protein 2	0	-0.112148	-0.159817	-0.118786	-0.123623	-0.188957	0	0.155235	0.187824	-0.00434875	0.226322	-0.0270214	0	0.0597172	-0.00251961	0.0856686	-0.342051	0.0887737	0	-0.0805302	-0.184099	-0.178682	-0.12372	-0.114969	0	-0.35305	0.00297737	-0.0143509	-0.0653191	0.131712	0	-0.0902462	-0.2679	-0.0406399	-0.0924015	-0.0232487	0	-0.175318	-0.258667	-0.17202	-0.265144	-0.187609	0	-0.144749	-0.0854187	-0.10552	-0.113646
P37802	TAGLN2	Transgelin-2	0	0.0145588	-0.321045	0.0347385	0.0642052	-0.0328159	0	-0.329742	-0.429707	-0.348478	-0.617792	-0.485121	0	-0.0285358	-0.0534077	-0.304268	-0.16707	0.294666	0	-0.0187912	0.169052	-1.10403	0.388849	0.0416241	0	-0.0816326	0.121716	-0.268864	0.0430412	0.022562	0	-0.218246	-0.170429	-0.147917	0.263964	-0.808102	0	1.11911	-1.34427	-0.373514	0.545315	0.170715	0	0.843567	1.30191	1.0824	0.113527
P39060	COL18A1	Collagen alpha-1(XVIII) chain	0	-0.161629	-0.0408535	-0.332521	-0.176302	0.135725	0	0.332247	0.332937	0.311737	-0.0105324	0.25202	0	0.627981	1.0097	1.16883	0.0938721	0.810276	0	0.154984	0.313156	0.551329	0.148623	-0.11536	0	-0.426413	0.0356178	-0.115339	-0.188993	-0.574621	0	-0.396566	-1.04994	-1.31749	-0.716476	-1.75252	0	-0.297274	-0.278225	-0.346144	0.017601	0.114706	0	0.121468	-0.0617809	-0.908236	0.021349
P40197	GP5	Platelet glycoprotein V	0	-0.883768	-1.11835	-0.627563	-0.733246	-1.60994	0	-0.256428	-0.572493	-0.076973	-0.2353	-0.324724	0	0.615839	0.621038	0.335749	0.503714	0.52211	0	0.474396	0.432558	0.574419	-0.563766	0.530752	0	-0.576609	-1.48647	-1.91916	-1.29377	-1.97621	0	-0.179142	-0.113832	-0.430592	-0.168522	-0.38851	0	-0.0257034	0.663469	0.332428	-0.0267239	0.774143	0	0.696714	0.306883	0.170927	-0.43778
P40925	MDH1	Malate dehydrogenase, cytoplasmic	0	0.00928688	0.0184689	0.181875	-0.0224819	0.0919094	0	0.123806	0.259281	0.194386	0.142508	0.179031	0	0.28326	0.418938	-0.187757	-0.113537	0.361437	0	-0.398397	-0.360451	-0.370701	-0.3587	-0.354441	0	-0.0131969	0.767597	0.181215	0.29283	0.370855	0	0.141527	0.554548	0.186035	0.254557	0.253658	0	0.018589	-0.0996342	0.128351	-1.63614	0.376545	0	-0.33218	-0.416695	-0.44269	-0.483187
P41222	PTGDS	Prostaglandin-H2 D-isomerase	0	-0.0621567	0.0894833	-0.0156708	-0.168222	0.112324	0	-0.174213	-0.115082	-0.138155	-0.196497	0.0171661	0	-0.0977001	-0.0805092	-0.052187	-0.154697	0.0763245	0	0.337791	0.233892	0.303885	0.309378	0.358889	0	-1.31759	0.0115242	-0.143963	-0.275908	-0.0801029	0	-0.298428	-0.0380383	-0.110491	-0.00821495	0.167665	0	-0.372698	0.0555191	0.109056	-0.140749	-0.101299	0	0.101913	0.286539	0.230417	0.0896931
P43121	MCAM	Cell surface glycoprotein MUC18	0	0.0300579	-0.00609589	0.0168457	-0.122843	-0.168808	0	-0.0803356	-0.172665	0.191603	-0.215044	-0.166573	0	-0.425095	-0.424774	-0.200701	-0.477283	-0.711773	0	0.0769482	0.111286	-0.778135	0.140186	-0.0161152	0	0.098875	-0.158468	0.260807	0.118521	-0.0811806	0	-0.0499763	-0.150946	-0.461159	0.0612621	-0.146582	0	-0.069582	0.262703	0.543282	0.828651	-0.226576	0	1.42649	-0.112932	0.511667	0.75178
P43251	BTD	Biotinidase	0	-0.0914955	0.0198975	0.0117035	-0.262772	-0.118141	0	-0.13319	0.0730209	-0.252907	-0.17992	-0.182243	0	0.0457611	-0.140417	0.17968	0.391989	0.177614	0	0.075531	-0.0952301	0.0619106	0.101915	0.149282	0	0.194595	0.0891666	0.172457	0.132498	0.296961	0	-0.198469	-0.339317	-0.134195	-0.252594	-0.223064	0	-0.36874	-0.136595	-0.140541	-0.0309753	-0.0503616	0	0.158792	0.0539761	0.039011	0.128643
P43652	AFM	Afamin	0	-0.121628	-0.0829773	-0.0862446	-0.166601	-0.174019	0	0.0525837	-0.0201988	0.0524673	0.0139046	-0.0127602	0	0.0560951	0.0238857	0.0108795	-0.0289726	0.0242729	0	0.0939732	0.0899315	0.0889168	0.0984535	0.0856152	0	-0.00996208	-0.054678	-0.0677738	0.12405	-0.00548935	0	0.0195694	0.0387001	0.0590515	0.0815163	0.0724125	0	-0.205791	-0.234592	-0.156157	-0.186638	-0.238314	0	0.142559	0.120567	0.116999	0.116594
P48637	GSS	Glutathione synthetase	0	-0.148291	-0.0925598	0.14296	0.0352211	-0.0276985	0	-0.0699558	0.346481	1.45399	0.0669937	1.05876	0	0.133408	-0.0313911	0.31008	0.408436	0.214346	0	-0.500757	-0.36965	0.442806	-0.868322	-0.833717	0	-0.407782	-0.642752	0.0325699	-0.325178	-0.786242	0	-0.0564365	-0.144388	-0.0368576	0.0576096	-0.228586	0	0.275557	0.0730228	0.104462	0.12549	0.104677	0	-0.0500717	0.150513	0.0946808	0.023222
P48740	MASP1	Mannan-binding lectin serine protease 1	0	-0.154194	-0.00739098	0.0972061	0.180273	-0.108217	0	0.0974064	-0.0211926	-0.140783	-0.203686	-0.0949459	0	-0.144848	-0.030941	-0.152403	-0.300648	-0.0554981	0	-0.113506	-0.135935	-0.309851	-0.0496922	-0.15591	0	-0.209261	-0.0246868	0.0810814	0.176661	0.0567436	0	0.00407791	0.21513	0.056778	0.0350475	0.0704327	0	-0.0256386	0.0252991	0.017868	0.199884	0.0848637	0	0.17499	-0.152719	-0.0837631	0.162422
P49747	COMP	Cartilage oligomeric matrix protein	0	0.0141983	0.0253277	0.0121193	0.179571	0.521091	0	0.243904	0.244244	0.383076	0.317636	0.268736	0	0.161619	-0.213732	0.155172	0.0864677	0.353926	0	-0.0998955	-0.00578499	0.179625	-0.103424	-0.123571	0	-0.135178	-0.0657883	-0.0113544	-0.0117264	-0.316181	0	0.357016	0.135691	-0.0823879	0.189943	0.210333	0	0.00487328	0.313213	0.132179	-0.104479	-0.236898	0	-0.172094	0.179281	0.304356	0.0916653
P49908	SELENOP	Selenoprotein P	0	0.0285454	0.0486317	0.00267029	-0.0971432	-0.0143642	0	-0.0515728	-0.309866	-0.0591679	-0.0334873	-0.165728	0	0.139528	0.0800247	-0.0518665	0.0664368	0.115253	0	-0.0911102	-0.0579662	-0.0655022	0.0171089	-0.064373	0	0	0.000471115	-0.30666	-0.0150738	-0.0951042	0	0.0538063	-0.120913	0.000459671	-0.120449	-0.0239048	0	-0.0568752	0.0181904	-0.127192	-0.060339	0.0479107	0	0.190508	0.0592003	0.15683	0.12229
P51153	RAB10	Ras-related protein Rab-13	0	2.0299	1.57848	1.80334	1.73613	-0.330475	0	-0.103245	-0.405512	-0.288174	0.0332336	-0.00768852	0	0.751688	0.68564	0.406858	0.745356	0.906429	0	1.13928	1.02843	1.07062	-0.238327	1.11184	0	2.48593	1.9765	1.9806	2.16384	2.02939	0	-1.39877	-1.00101	-1.97491	0.288952	0.295876	0	-2.45839	-0.927618	0.22023	0.288725	-0.953556	0	2.1967	-0.0774364	2.16217	0.439569
P51884	LUM	Lumican	0	-0.102896	0.0470867	-0.018961	-0.0486603	0.00295639	0	0.151733	0.10713	0.097126	0.0704269	-0.0211811	0	0.199457	0.113649	0.251366	0.165432	0.160395	0	0.216995	0.106588	0.0703316	0.0683098	-0.00578308	0	0.0245171	0.115734	0.182276	0.140219	-0.0265789	0	-0.152592	0.0117912	0.0152931	-0.0327663	-0.0932961	0	-0.130148	-0.101444	-0.0709133	-0.0660477	-0.0808105	0	-0.0255222	-0.0833035	-0.0553322	-0.0657482
P52907	CAPZA1	F-actin-capping protein subunit alpha-1	0	0.145178	0.144463	0.06674	-0.0215225	0.140938	0	-0.189619	-0.170944	-0.00955391	-0.0689411	-0.170885	0	0.0190468	0.0209141	0.133677	-0.028059	-0.0447559	0	0.155216	-0.09758	-0.00703239	-0.027916	0.0113754	0	0.161669	-0.103085	-0.00763512	-0.08568	-0.0784512	0	0.131399	-0.039257	0.133137	-0.00311852	-0.00382805	0	-0.177114	-0.235239	-0.274542	-0.0833015	-0.0840263	0	0.0642433	0.100359	0.119678	0.181509
P54108	CRISP3	Cysteine-rich secretory protein 3	0	0.165766	-0.325569	0.042841	-0.116182	-0.243807	0	0.0689754	-0.0589867	-0.114231	0.112967	-0.0216465	0	0.34252	0.405434	0.439735	0.605574	0.57527	0	-0.215967	-0.352577	0.00837898	0.670809	-0.106827	0	0.0262985	0.135975	-0.0209599	-0.161036	-0.15432	0	-0.382012	-0.404014	-0.371999	-0.247993	-0.0228024	0	-0.317743	0.10187	-0.290323	0.144402	-0.177746	0	-0.147799	0.282036	-0.132488	-0.358047
P54289	CACNA2D1	Voltage-dependent calcium channel subunit alpha-2/delta-1	0	-0.0390797	-0.0469608	0.231382	0.17684	0.896145	0	0.0964622	0.316246	0.171421	-0.0770664	0.14407	0	0.043232	-0.154554	0.0781345	-0.181885	-0.031374	0	-0.41028	-0.0902977	-0.00749779	-0.147581	0.168297	0	-0.290306	0.451199	0.278711	-0.113384	0.295168	0	-0.194134	-0.171637	0.128805	0.0180206	-0.102856	0	0.0256195	0.00494576	0.276272	-0.427942	0.475876	0	-0.231611	0.149374	0.06744	-0.295805
P55056	APOC4	Apolipoprotein C-IV	0	-0.476835	-0.712269	-1.11501	-1.46841	-1.25121	0	0.0162277	-0.0218105	-0.0236759	-0.2199	-0.103727	0	0.125038	0.193516	-0.614126	-0.447056	-0.283878	0	-0.0773201	-0.128386	-0.280823	-0.333927	-0.389069	0	-0.514074	-0.388367	-0.716919	-1.00803	-1.99347	0	-0.0910149	0.0717869	0.038166	-1.44351	-0.235695	0	-0.254015	0.32407	0.514091	-0.147142	0.360838	0	0.419744	0.833729	0.789553	0.0393143
P55058	PLTP	Phospholipid transfer protein	0	-0.278055	-0.359493	-0.153656	-0.410391	-0.353624	0	-0.115522	-0.302931	-0.334421	-0.173954	-0.218111	0	0.188074	-0.11709	-0.127419	0.112911	-0.0193729	0	0.287996	0.218851	0.0035572	0.037199	0.00111961	0	0.072628	-0.339273	-0.297813	-0.181135	-0.287472	0	0.0867577	0.178465	0.201859	0.509161	0.179777	0	-0.105453	-0.394707	-0.238161	-0.146549	-0.255169	0	0.187258	-0.0136337	0.00894356	0.194132
P55072	VCP	Transitional endoplasmic reticulum ATPase	0	-0.074707	-0.178963	0.0732861	-0.249666	-0.122103	0	0.118765	0.199903	0.316238	0.237864	0.391823	0	-0.105381	-0.139448	-0.206667	-0.135197	0.00302696	0	-0.458633	-0.132607	-0.445545	-0.269222	-0.362062	0	-0.178143	0.056963	0.0985947	0.238935	-0.0540199	0	-0.180838	-0.118923	0.099329	-0.0327682	-0.0510807	0	-0.405626	0.133438	0.269304	0.224783	-0.272429	0	0.35428	0.475054	0.369146	0.0878925
P55285	CDH6	Cadherin-6	0	0.210075	-0.110003	0.203197	-1.48036	0.110094	0	-0.0216446	-0.218918	0.146006	-0.306099	-0.0759029	0	0.261633	0.910189	0.091114	0.193407	0.629072	0	-0.694237	-0.474178	-0.760578	-0.388601	-0.596663	0	-1.29298	0.736162	0.238331	0.0469933	0.0865822	0	-0.0282288	0.614613	0.14535	-0.428488	0.618223	0	-0.424295	-0.424477	-1.16301	-0.774385	-0.438181	0	0.0729504	0.363047	0.17181	-0.231853
P55290	CDH13	Cadherin-13	0	-0.167963	0.0443192	-0.0870285	-0.235493	-0.324175	0	0.0642967	0.132538	0.103683	0.0793667	-0.0268707	0	-0.0955696	-0.423624	-0.227375	-0.258657	-0.26758	0	0.185856	0.112494	0.211506	0.11257	0.00541878	0	0.0584507	-0.0609703	-0.115191	-0.0336056	-0.0990963	0	-0.133629	-0.0831547	0.014822	0.00529671	0.0187016	0	0.100958	-0.10194	0.191179	0.336689	0.0160389	0	-0.120554	-0.145767	0.0779915	0.0928669
P60174	TPI1	Triosephosphate isomerase	0	-0.0169849	-0.050642	-0.0452671	0.0753174	0.103466	0	-0.0370674	-0.0462284	-0.0149746	-0.102064	-0.090107	0	0.0980587	0.0758495	0.104305	0.126919	0.174316	0	0.0743351	0.221209	0.339954	0.116365	0.398275	0	-0.476803	-0.0828228	0.0892143	0.0856571	-0.117188	0	-0.0905437	-0.0767536	-0.128654	-0.185522	-0.166067	0	-0.177706	0.200445	-0.112413	-0.176491	-0.0328465	0	0.518143	0.651487	0.548183	0.502489
P60709	ACTB	Actin, cytoplasmic 1	0	-0.970745	-1.28261	-0.515799	-0.304108	-0.707968	0	0.664846	0.87048	0.732817	0.255154	0.443739	0	0.366137	0.463511	-0.346638	-0.098444	0.426834	0	-0.764727	-0.82622	-0.683239	-0.550261	-0.379911	0	0.0171185	0.205193	0.171034	0.308279	-0.107203	0	0.856216	0.156448	0.0965843	-0.128677	-0.139919	0	0.596359	0.48908	0.152079	-0.222385	1.45009	0	-1.02306	-0.541599	-0.807489	-0.324284
P61158	ACTR3	Actin-related protein 3	0	0.337446	0.194286	-0.228367	-0.254324	-0.596834	0	-0.130367	-0.509205	-0.0627613	0.0691032	0.0962334	0	0.466688	0.248934	-0.586597	0.0858154	0.533236	0	-1.29213	-0.490746	-0.970682	-0.592854	-0.514618	0	-0.487455	0.608896	0.184702	-0.201487	0.367857	0	0.688627	0.37833	0.679434	0.544903	0.131308	0	-0.202963	-0.800877	-1.20907	-1.07331	-0.405691	0	-1.14915	-1.05163	-0.522537	-0.964314
P61224	RAP1B	Ras-related protein Rap-1b	0	0.476065	-0.649059	-0.740257	0.6464	4.6349	0	0.110577	0.595015	-0.115786	-0.148952	0.219006	0	0.643478	-0.446739	-0.346224	-0.00600433	-0.0154953	0	-0.783857	-0.943926	0.0157242	-0.33906	-0.113434	0	0.872686	0.940416	1.04549	1.51535	1.72397	0	0.223396	-0.0958042	-0.0599804	-0.468885	-0.413033	0	0.885775	0.958843	0.37332	0.521498	1.05266	0	0.168346	-1.01499	-0.275944	-0.39529
P61626	LYZ	Lysozyme C	0	0.713673	0.567293	0.174019	0.654833	0.679609	0	0.089098	-0.215422	-0.0748062	-0.245041	-0.297577	0	-0.0925331	0.0506516	-0.210299	-0.0938492	0.0743256	0	-0.329329	-0.87804	-0.685705	-0.355846	-0.731665	0	-0.0614891	-0.030653	0.199781	-0.280916	-0.0694885	0	-0.21697	0.0499859	-0.227318	-0.366884	-0.367588	0	0.108728	-0.221228	-0.264359	-1.3009	-0.685738	0	-1.74919	-1.04702	-2.86728	-1.39821
P61769	B2M	Beta-2-microglobulin	0	0.265095	0.7745	0.572433	0.511021	0.799725	0	-0.346251	0.179874	0.170914	0.448622	-0.0577087	0	0.215843	-0.0202007	0.178558	0.0435619	0.24814	0	0.0963783	0.0529842	0.24156	0.160656	0.287416	0	0.0873737	0.219404	-0.422859	-0.00900269	-0.071661	0	-0.306356	-0.165377	-0.412931	-0.0851231	-0.375547	0	0.235855	0.730785	0.404352	0.608868	0.439339	0	-0.372297	0.0349503	-0.146284	-0.0759335
P61916	NPC2	NPC intracellular cholesterol transporter 2	0	-1.02125	-1.18771	-1.72458	-2.32729	-2.02768	0	-0.839857	-1.15659	-1.09214	-0.584028	-1.26188	0	-1.20054	-1.06325	-1.38082	-1.91278	-0.315159	0	0.987074	0.342779	0.365307	-0.400635	1.15739	0	-0.332632	-0.423468	-0.218597	0.620266	0.602154	0	-0.731432	0.333878	-0.0227642	0.0580235	0.641277	0	-0.243656	-0.939381	-1.17227	-0.601851	0.0253658	0	0.631144	0.618885	0.0996189	0.55529
P62937	PPIA	Peptidyl-prolyl cis-trans isomerase A	0	-0.280945	-0.828939	-0.333055	-0.0964718	-0.237158	0	-0.36006	-0.296225	-0.508652	-0.604509	-0.533657	0	-0.191223	-0.450186	-0.152	-0.0781384	0.0456371	0	-0.532322	-0.218132	-0.763353	-0.727173	-0.257141	0	-0.42573	-0.133944	-0.303688	-0.229874	-1.01747	0	0.448719	0.676373	0.602722	0.417881	0.0745258	0	0.833666	0.416107	0.604435	0.436716	0.872881	0	-0.927868	-0.0966015	-0.590866	-0.10582
P67936	TPM4	Tropomyosin alpha-4 chain	0	-0.272539	-0.194345	-0.431662	-0.215734	-0.682623	0	0.0990906	0.0133972	-0.0863934	-0.137987	0.163424	0	-0.0350075	-0.0860558	-0.238392	0.0141983	-0.102072	0	-0.0167542	0.113375	0.218826	0.155621	0.256046	0	-0.247303	-0.149967	-0.0600224	-0.1196	-0.0546188	0	0.275234	-0.00469017	-0.226101	-0.113508	-0.221294	0	0.29604	0.162256	0.369017	0.352093	0.340351	0	0.0974979	0.0187302	-0.0387802	0.0342979
P68871	HBB	Hemoglobin subunit beta	0	-1.64259	-1.75966	-1.84359	-1.68044	-1.98153	0	-0.240034	1.11587	-0.108599	0.36977	1.25454	0	-0.41921	-0.169203	0.0783424	-0.0679493	-0.180147	0	-0.666527	0.104815	-0.0384998	0.252914	-0.121557	0	0.331545	-0.323202	0.246159	0.427588	0.312656	0	0.22229	0.935747	0.385206	0.0558205	0.111528	0	0.240543	0.482201	0.456657	0.458773	-0.19832	0	-0.280436	1.91168	0.0247688	-0.405048
P69905	HBA1	Hemoglobin subunit alpha	0	-1.65261	-1.90353	-1.9385	-1.87818	-2.07773	0	-0.21529	1.22641	0.0176964	0.438351	1.38456	0	-0.436806	-0.28923	0.0397701	-0.133245	-0.246689	0	-0.717873	0.162666	0.0263062	0.328596	-0.0633659	0	0.246168	-0.378168	0.129276	0.291447	0.266779	0	0.19916	0.964508	0.488865	0.14477	0.15518	0	0.323383	0.486824	0.479801	0.570498	-0.0723248	0	-0.376247	1.83528	-0.0503674	-0.562824
P78417	GSTO1	Glutathione S-transferase omega-1	0	0.121077	-0.158852	-0.116976	0.0331745	-0.285187	0	0.0223598	0.260519	0.308708	0.234108	0.370495	0	0.42782	0.291464	-0.0926743	0.0804691	0.181723	0	0.146034	0.0194378	-0.0912018	-0.169447	-0.1626	0	0.0686512	0.0451221	-0.208181	-0.132835	-0.0979061	0	0.0647697	-0.0670452	-0.0776901	0.165707	0.0233116	0	-0.348881	0.154373	0.169239	-0.0199032	-0.230814	0	-0.163168	0.1066	-0.293427	-0.387379
P78509	RELN	Reelin	0	0.208176	0.243759	0.150385	-0.0286922	0.121984	0	-0.049839	-0.0428543	-0.0554066	0.103888	-0.123512	0	0.247725	0.366932	0.122644	0.10878	0.250376	0	-0.176159	-0.658514	-0.314243	-0.437387	-0.607588	0	-0.0142021	0.18405	-0.101191	0.0827827	0.100433	0	0.013092	0.0694656	-0.121593	-0.0460606	-0.0131931	0	0.105795	-0.489603	0.0799675	0.286243	0.0541821	0	-0.1998	-0.291964	-0.257013	-0.163923
P80108	GPLD1	Phosphatidylinositol-glycan-specific phospholipase D	0	-0.0981636	-0.0593376	-0.0559788	-0.120909	-0.04105	0	-0.134487	-0.180368	-0.270346	-0.228411	-0.16964	0	-0.0394516	-0.0889473	-0.0849476	-0.121872	-0.0984077	0	0.170588	0.255894	0.163254	0.249971	0.136829	0	-0.28701	-0.115028	-0.0921402	-0.0419292	-0.0979347	0	-0.12883	0.0454502	-0.0958309	0.0239735	0.0136204	0	-0.0257912	-0.0161839	-0.0267105	-0.00235367	0.00535202	0	0.190704	0.285212	0.276291	0.23061
P80748	IGLV3-21	Immunoglobulin lambda variable 3-21	0	-0.168539	-0.0130196	-0.267267	-0.396143	-0.386425	0	0.156822	-0.010643	-0.0619774	-0.0156555	-0.00728607	0	0.108631	0.0506897	-0.224134	-0.20138	-0.184439	0	-0.0443535	-0.0515633	-0.031599	-0.0402946	-0.0863647	0	-0.146318	-0.0995674	-0.232288	-0.179396	-0.0223789	0	0.0548477	-0.0219784	-0.000236511	0.139091	0.173086	0	0.256887	0.0669632	0.0370808	0.404606	0.15819	0	0.227892	0.191036	0.206339	0.118734
P84085	ARF5	ADP-ribosylation factor 5	0	-0.0533047	-0.319679	-0.0651836	0.0880547	0.0452328	0	1.05949	0.439156	0.0757809	0.548096	0.305178	0	-0.13648	-0.697111	-0.237127	-0.368492	0.0178699	0	-0.537457	-0.565365	-0.0190907	-0.598276	-0.297312	0	-0.0262413	-0.307287	0.0230923	0.253088	-0.0401974	0	-0.21455	-0.891706	-0.596367	-0.281883	-0.747162	0	0.0582275	0.522984	0.293941	0.0404205	0.0413017	0	-0.336107	0.217394	-0.0762062	0.175531
P98160	HSPG2	Basement membrane-specific heparan sulfate proteoglycan core protein	0	0.00737762	0.293486	-0.0494213	-0.195801	0.139299	0	-0.132528	-0.0385742	-0.250681	-0.283712	-0.293121	0	0.0512085	0.0101471	-0.0809097	-0.00047493	0.0726719	0	0.133371	0.0733509	0.0953579	0.298077	0.249941	0	0.159739	0.145435	-0.183962	0.0931129	0.197144	0	-0.00917053	-0.251032	0.00967979	0.0513687	-0.0584431	0	-0.130728	0.249447	-0.131725	0.136286	0.045866	0	-0.0373135	-0.0636902	0.0646534	-0.168989
Q00610	CLTC	Clathrin heavy chain 1	0	-0.268408	-0.501286	-0.220636	-0.685764	-0.562855	0	-0.120808	-0.104748	-0.0749474	-0.0668678	-0.183825	0	-0.239208	-0.26161	-0.511864	-0.470036	-0.541342	0	-0.20632	-0.296495	-0.294231	-0.133289	-0.0989418	0	-0.184475	-0.263292	-0.372978	-0.33477	-0.510523	0	0.168594	0.182964	-0.114002	0.210421	0.153662	0	-0.164169	-0.292294	-0.0874538	-0.364367	-0.290289	0	-0.129667	0.464811	-0.00560188	0.259623
Q01459	CTBS	Di-N-acetylchitobiase	0	0.275375	0.283297	0.212938	-0.6681	0.0602417	0	0.453909	0.375551	0.213421	0.350212	0.264517	0	0.335213	-0.120733	-1.00061	0.484766	0.274296	0	0.141546	-0.0227146	0.138449	0.183155	-0.0400143	0	0.272621	-0.643648	-0.95961	-0.768551	-0.29574	0	0.393696	-0.0342045	-0.360634	0.442495	0.531471	0	0.213913	0.0688877	0.404274	0.404366	0.378485	0	-0.121996	-0.3689	-0.653315	-0.198557
Q01518	CAP1	Adenylyl cyclase-associated protein 1	0	0.101559	-0.0798779	0.0542698	0.236267	-0.186304	0	-0.0430145	-0.0688858	-0.127563	-0.236027	-0.227251	0	0.0343151	0.133236	-0.0290737	-0.392523	0.0471058	0	-0.244181	-0.192299	-0.435154	-0.331045	-0.199772	0	0.0951805	0.410776	0.229048	0.162195	0.266714	0	0.00838661	-0.0168037	-0.0477562	0.0150509	-0.0641804	0	-0.0811539	0.0499191	0.081543	-0.147316	-0.0788975	0	-0.154289	-0.177298	-0.166136	-0.124231
Q02413	DSG1	Desmoglein-1	0	0.0423336	0.181185	0.360678	-0.132706	0.352783	0	0.0994396	-0.424318	-0.0381908	-0.0126095	-0.137115	0	-0.130438	-0.295927	-0.0790272	-0.118277	-0.34145	0	0.426224	-0.0207901	0.242167	0.119919	0.192076	0	-0.116987	-0.202423	0.0950394	-0.239992	-0.241405	0	0.0188599	-0.102396	0.234821	0.0195179	0.102312	0	-0.119465	0.102226	0.163588	0.21908	0.23749	0	0.133398	0.0664291	0.200459	0.116453
Q03181	PPARD	Peroxisome proliferator-activated receptor delta	0	-0.301905	0.149897	0.0873947	0.199459	0.255968	0	0.10807	0.0824203	0.173424	0.108288	0.0040741	0	0.133747	0.197489	0.144709	0.149069	0.00236893	0	-0.168079	-0.0113983	-0.1401	-0.103262	-0.070549	0	0.163076	0.0071888	0.0995941	0.0888557	-2.32949	0	-0.146942	-0.0940456	-0.0817223	-0.226578	-0.135244	0	-0.647018	-0.199873	-0.185156	-0.186899	-0.0274982	0	0.24704	0.131617	-0.130831	0.0226269
Q03591	CFHR1	Complement factor H-related protein 1	0	0.00477219	-0.0522671	-0.0504932	0.165583	-0.151119	0	-0.0619259	-0.123312	0.0133114	-0.118	-0.114344	0	0.163019	0.263853	0.0676003	0.118116	0.266151	0	-0.290762	-0.315655	-0.293245	-0.264809	-0.307749	0	-0.173052	0.247093	0.00543404	-0.10498	0.33503	0	-0.0941811	-0.149162	-0.0606537	-0.070343	-0.0562515	0	-0.00437546	-0.151922	-0.0952663	-0.132315	-0.0379677	0	-0.293451	-0.244043	-0.191725	-0.239862
Q04756	HGFAC	Hepatocyte growth factor activator	0	0.00265503	0.0832043	-0.0290489	-0.20916	-0.196228	0	-0.260658	-0.0747318	-0.0174274	-0.132389	0.00527573	0	0.349201	0.472286	0.267118	0.34692	0.444286	0	-0.235334	0.034544	-0.238777	-0.0360985	-0.140081	0	0.23052	-0.032486	0.152016	0.0525875	0.116232	0	-0.146502	-0.103565	-0.310966	0.0225143	-0.276247	0	0.14179	0.0852909	-0.031868	-0.0686455	-0.176962	0	-0.104343	-0.096405	-0.151752	-0.199188
Q05682	CALD1	Caldesmon	0	0.0641041	0.305668	0.259306	0.413166	0.43037	0	-0.137173	0.119925	-0.0312977	0.04772	0.0491333	0	0.206974	0.0537949	0.467297	0.351496	0.293844	0	-0.0680046	-0.193579	0.139727	0.168753	0.150099	0	-0.0808849	-0.201815	-0.192898	0.123854	-0.500843	0	0.0407238	-0.17437	0.101803	0.0286331	0.0379543	0	-0.551077	0.498417	0.367813	0.38448	0.313162	0	-0.69137	0.177372	-0.0460396	-0.121092
Q06033	ITIH3	Inter-alpha-trypsin inhibitor heavy chain H3	0	-0.127958	-0.149702	-0.224461	-0.117048	-0.0792599	0	-0.105677	-0.163275	-0.0841522	-0.0850277	0.0629826	0	-0.294252	-0.294062	-0.316782	-0.330824	-0.354136	0	0.128204	0.0903664	0.212168	0.273727	0.248438	0	0.104992	-0.0287113	0.0783691	0.0644741	0.143774	0	-0.234158	-0.240948	-0.173098	-0.205877	-0.260096	0	-0.289673	-0.177227	-0.328566	-0.276562	-0.300304	0	-0.234289	-0.365931	-0.272358	-0.257885
Q06830	PRDX1	Peroxiredoxin-1	0	0.517433	0.00330162	0.222673	0.209021	0.374214	0	-0.567322	-0.647671	-0.567234	-0.73838	-0.438025	0	0.244783	-0.102684	0.0335655	0.430557	0.117077	0	-0.197943	0.200632	0.234121	-0.546795	-0.166466	0	-0.318172	-0.207817	0.171658	-0.0584221	0.288603	0	0.287281	0.0655155	-0.550974	0.0996532	0.163635	0	0.0744534	0.0772114	0.119251	0.0719776	0.0809231	0	0.197149	0.292469	0.406004	0.218254
Q07075	ENPEP	Glutamyl aminopeptidase	0	0.0769768	0.0844002	-0.0447826	-0.0152931	1.7532	0	0.666536	0.800625	0.853359	0.863838	0.446587	0	0.0929356	-0.0869961	-0.162121	-0.167372	-0.0777092	0	0.0308113	-0.524677	-0.288742	-0.409918	-0.0442333	0	-0.375849	0.0204926	0.154329	-0.187214	0.135231	0	0.196812	0.0792236	-0.264463	0.139015	-0.00288773	0	0.25013	-0.0910721	-0.191309	0.156618	-0.118874	0	-0.137754	-0.935194	-0.285774	-0.281433
Q07954	LRP1	Prolow-density lipoprotein receptor-related protein 1	0	-0.139385	0.0835056	0.0740814	0.145992	0.139297	0	0.0910282	-0.0254955	-0.0999508	0.130695	0.069706	0	0.137665	0.0946388	0.0956421	0.000631332	0.143484	0	-0.123421	-0.0604668	-0.235813	-0.194204	-0.123394	0	-0.0891953	0.101816	0.158781	0.0339184	0.0561352	0	-0.00306511	0.079977	0.0734158	0.0516243	0.103996	0	0.0460091	0.0798626	0.152742	0.0857754	0.106205	0	-0.199486	-0.179028	-0.161976	-0.124025
Q08188	TGM3	Protein-glutamine gamma-glutamyltransferase E	0	-0.138721	0.215673	0.223331	0.189913	-0.0262394	0	-0.0940189	-0.182058	0.246786	-0.225399	0.0584564	0	0.0968189	0.113083	0.26087	0.264349	0.191151	0	0.204445	-0.0290604	0.0600739	0.299562	-0.0562801	0	0.421463	0.140942	-0.201683	0.126965	0.148399	0	-0.146904	-0.450682	-0.284458	-0.1513	-0.18619	0	-0.299454	0.101685	-0.0228691	0.194578	0.0716457	0	-0.0448074	-0.151539	-0.101887	0.136396
Q08380	LGALS3BP	Galectin-3-binding protein	0	-0.379538	0.0378056	-0.0425816	-0.128157	-0.0381203	0	0.0773125	0.178755	0.245256	0.120884	-0.173571	0	0.102745	0.182816	0.182661	0.0777397	-0.04533	0	-0.0751858	0.000385284	-0.106426	-0.0229549	-0.1168	0	-0.15477	-0.204128	-0.45385	-0.158262	-0.172045	0	-0.0996132	-0.0213337	-0.00343895	-0.125692	-0.0586948	0	-0.200434	-0.0494499	-0.296284	-0.0243111	-0.634642	0	0.2745	0.254152	0.367823	0.144686
Q08830	FGL1	Fibrinogen-like protein 1	0	0.344202	0.347078	0.157864	0.393404	0.458712	0	0.0998306	-0.27235	0.260059	0.234955	-0.0820618	0	-0.0788822	0.0649414	-0.161148	-0.0348225	-0.0810909	0	-0.252949	-0.460878	-0.383537	-0.0123749	-0.576145	0	-0.0843639	0.335363	0.165466	0.0750351	-0.0329075	0	-0.0867958	0.0619564	0.0459709	-0.151571	0.0867462	0	-0.0143566	0.880301	0.140339	-0.00169563	0.368145	0	-0.388697	-0.431898	-0.16053	-0.221756
Q10588	BST1	ADP-ribosyl cyclase/cyclic ADP-ribose hydrolase 2	0	0.434706	-0.0296783	0.103455	0.0935402	0.168955	0	0.131041	0.160418	0.136866	0.0230827	0.0204201	0	-0.266567	0.310741	-0.416815	-0.0869274	0.14172	0	-1.08253	-0.921923	-1.21454	-0.925459	-0.91181	0	-0.0814247	0.899769	0.388298	0.110744	0.328695	0	0.121042	0.00934219	0.0218124	0.0229816	0.195353	0	0.0661621	-0.231552	-0.0998173	-0.191132	-0.0754719	0	-0.615507	-0.686306	-0.54583	-0.868946
[truncated: 95 more rows]
[truncated: 253 more columns]
